# Supplementary material
Source: ML conference proceedings conference paper supplement (https://openreview.net/forum?id=VEqPDZIDAh)

A world map illustrating the distribution of the genus *Euphorbia*. The map uses three distinct color schemes to represent different levels of species presence:

- Yellow:** Represents the native range of the genus, covering most of North America, South America, Europe, Africa, and Australia.
- Orange:** Represents the introduced range, primarily located in the Mediterranean basin, Central Asia, and parts of South America and Africa.
- Red with diagonal lines:** Represents the invasive range, which is concentrated in North America (particularly the western and central regions), Europe (including the British Isles and the Mediterranean), and Asia (including China and India).

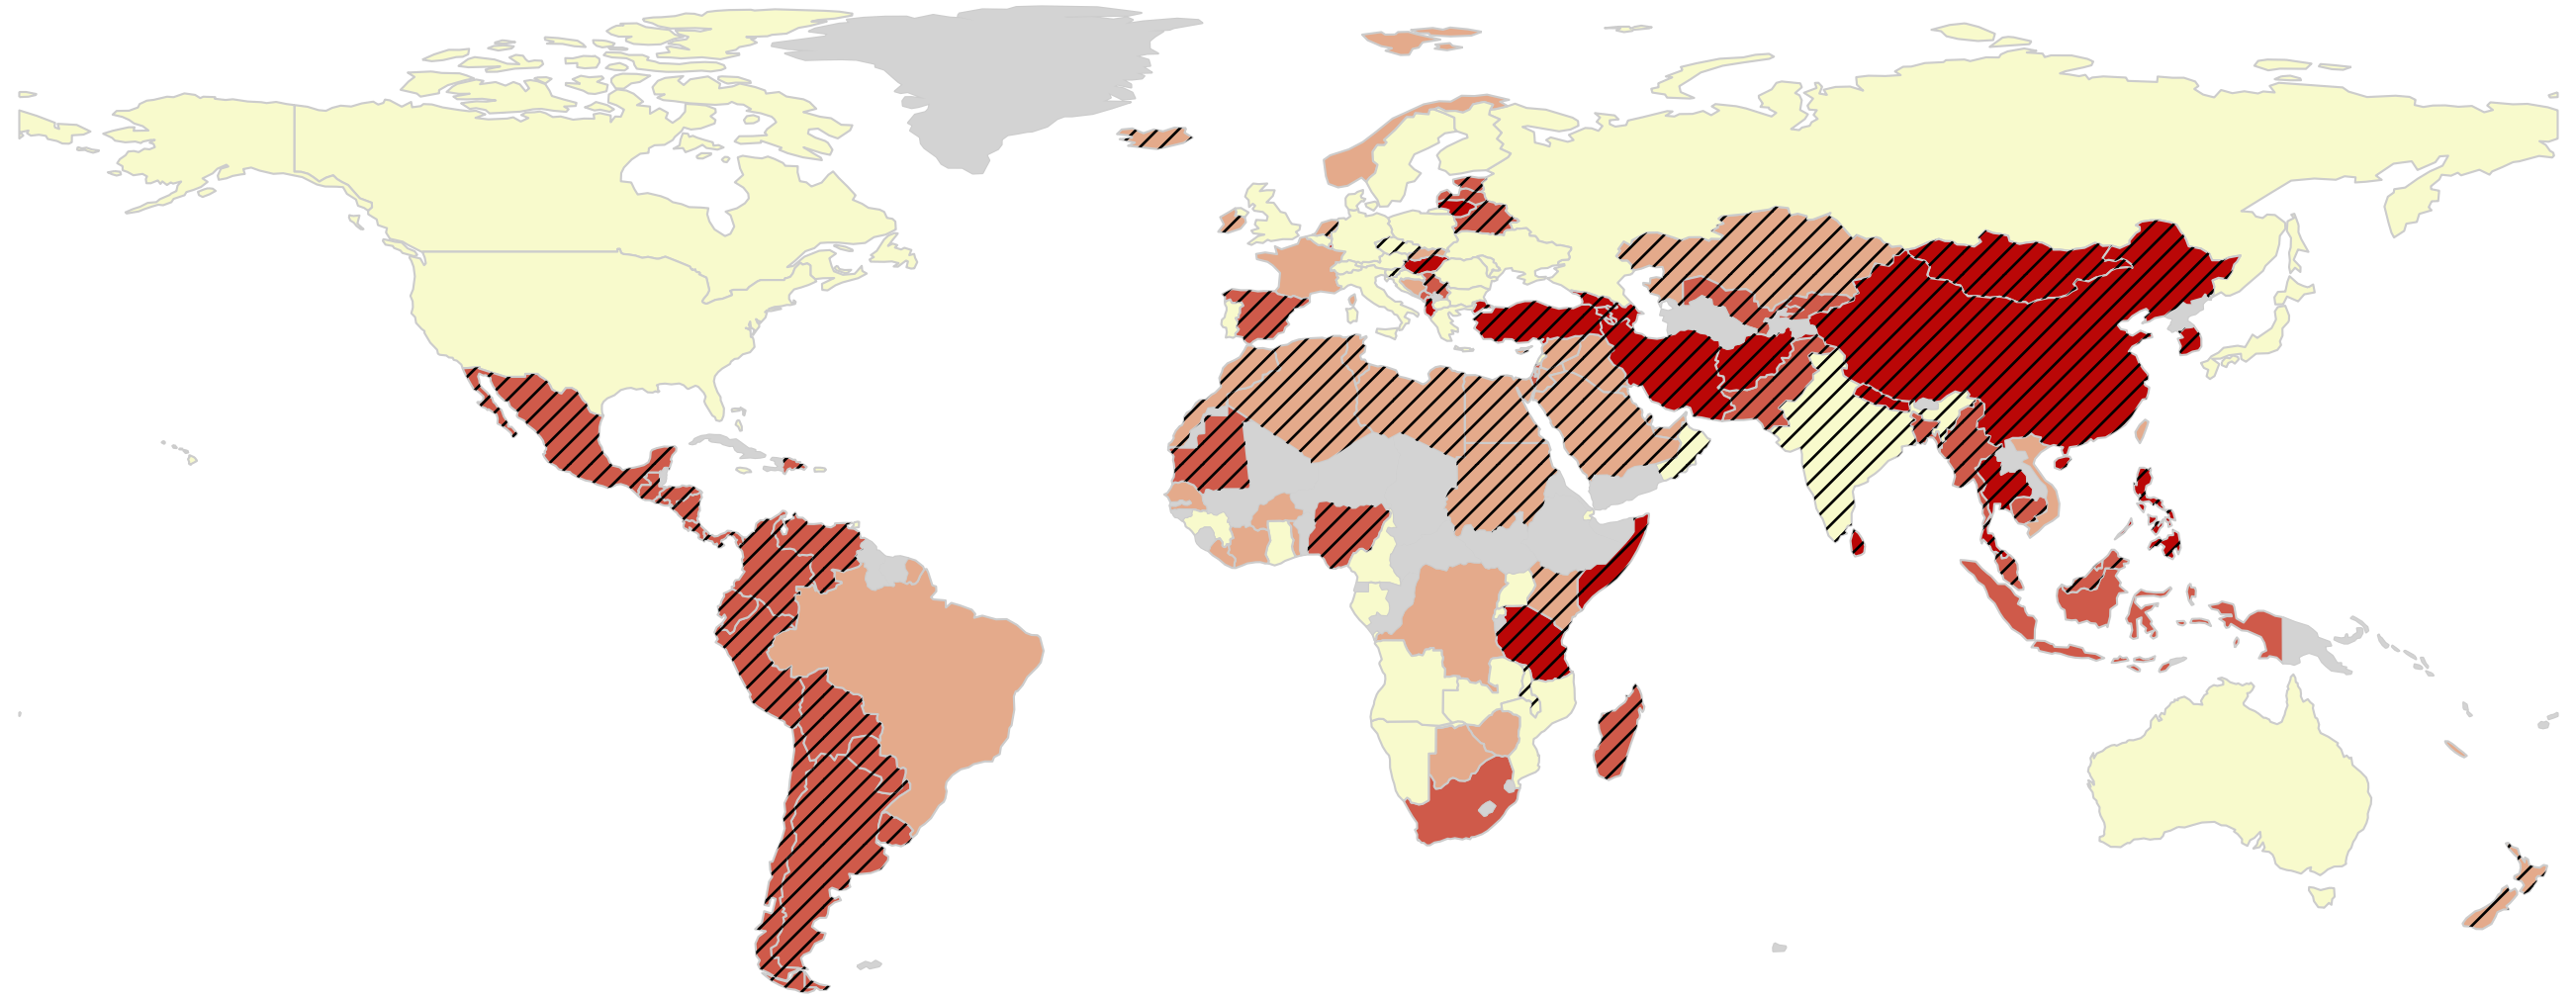

Supplement: supplementary_material [file attachment]
