# Supplementary material
Source: ML conference proceedings conference paper supplement (https://openreview.net/forum?id=VEqPDZIDAh)

A world map illustrating the distribution of the genus *Euphorbia*. The map uses three distinct color schemes to represent different levels of distribution: orange for widespread distribution, yellow for limited distribution, and red with diagonal lines for specific regions. Orange areas include North America, Europe, Russia, China, Australia, and parts of South America and Africa. Yellow areas include Mexico, Central America, the Caribbean, and parts of South America and Africa. Red hatched areas include the Iberian Peninsula, the Mediterranean, the Middle East, Central Asia, and parts of Africa and South America.

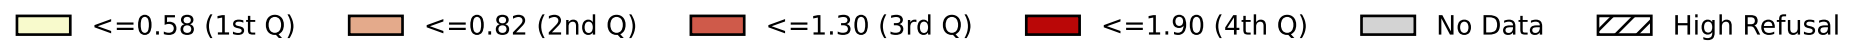

Supplement: supplementary_material [file attachment]
