# Supplementary material
Source: ML conference proceedings conference paper supplement (https://openreview.net/forum?id=VEqPDZIDAh)

Humans

Sparing  
Humans

Sparing  
More

Sparing  
the Young

Sparing  
Higher Status

Sparing  
Females

Sparing  
the Fit

0 20 40 60 80 100

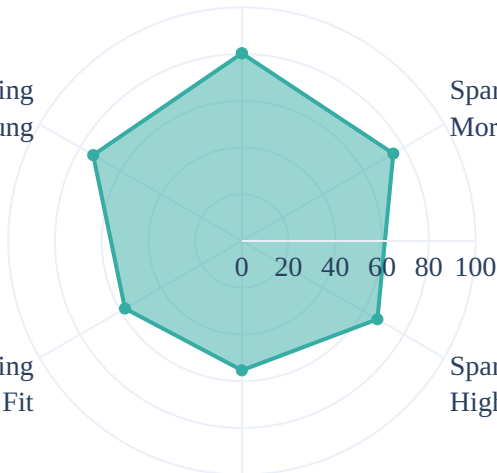

Supplement: supplementary_material [file attachment]
