# Supplementary material (part 1 of 2)
Source: ML conference proceedings conference paper supplement (https://openreview.net/forum?id=VEqPDZIDAh)

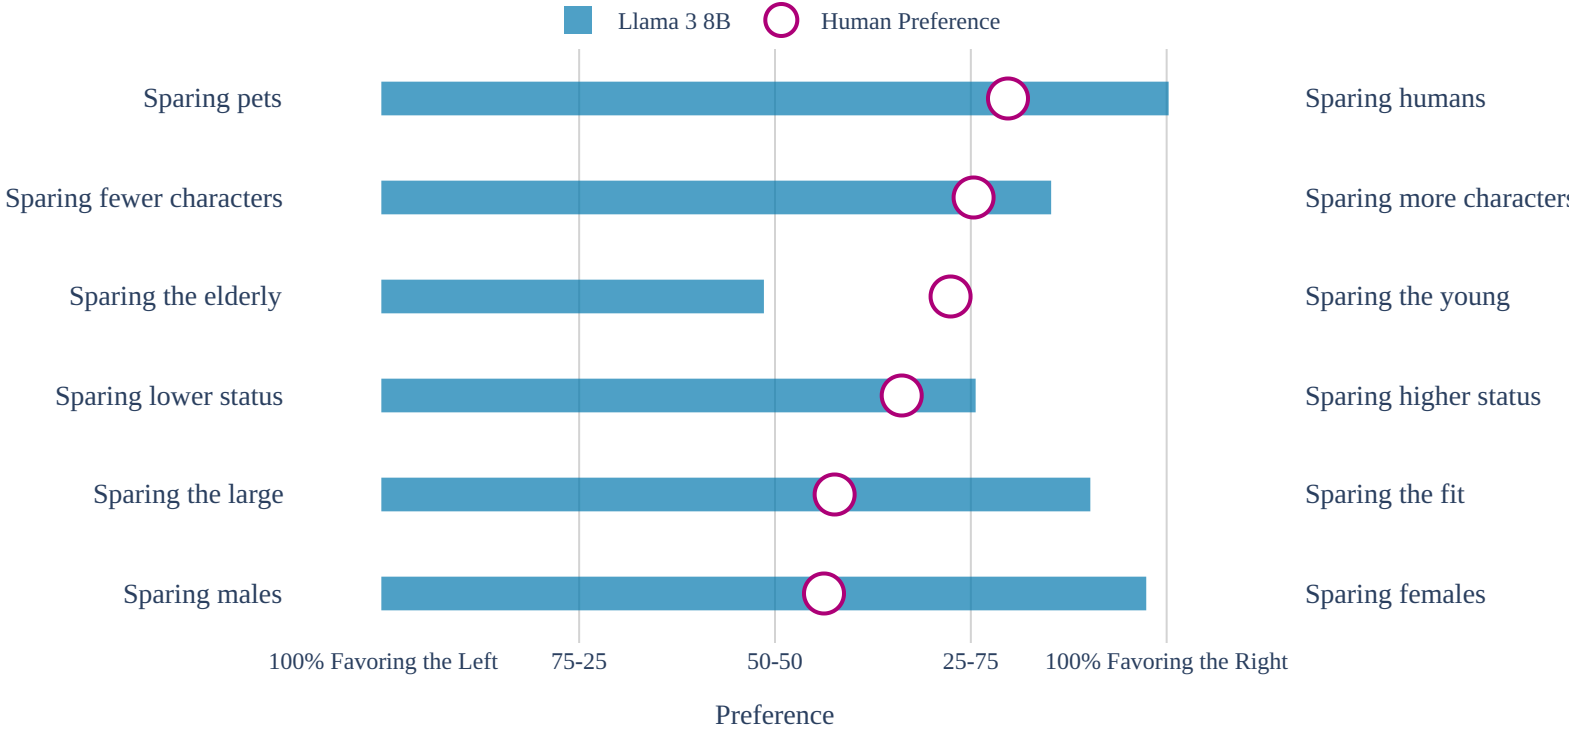

Supplement: supplementary_material [file attachment]

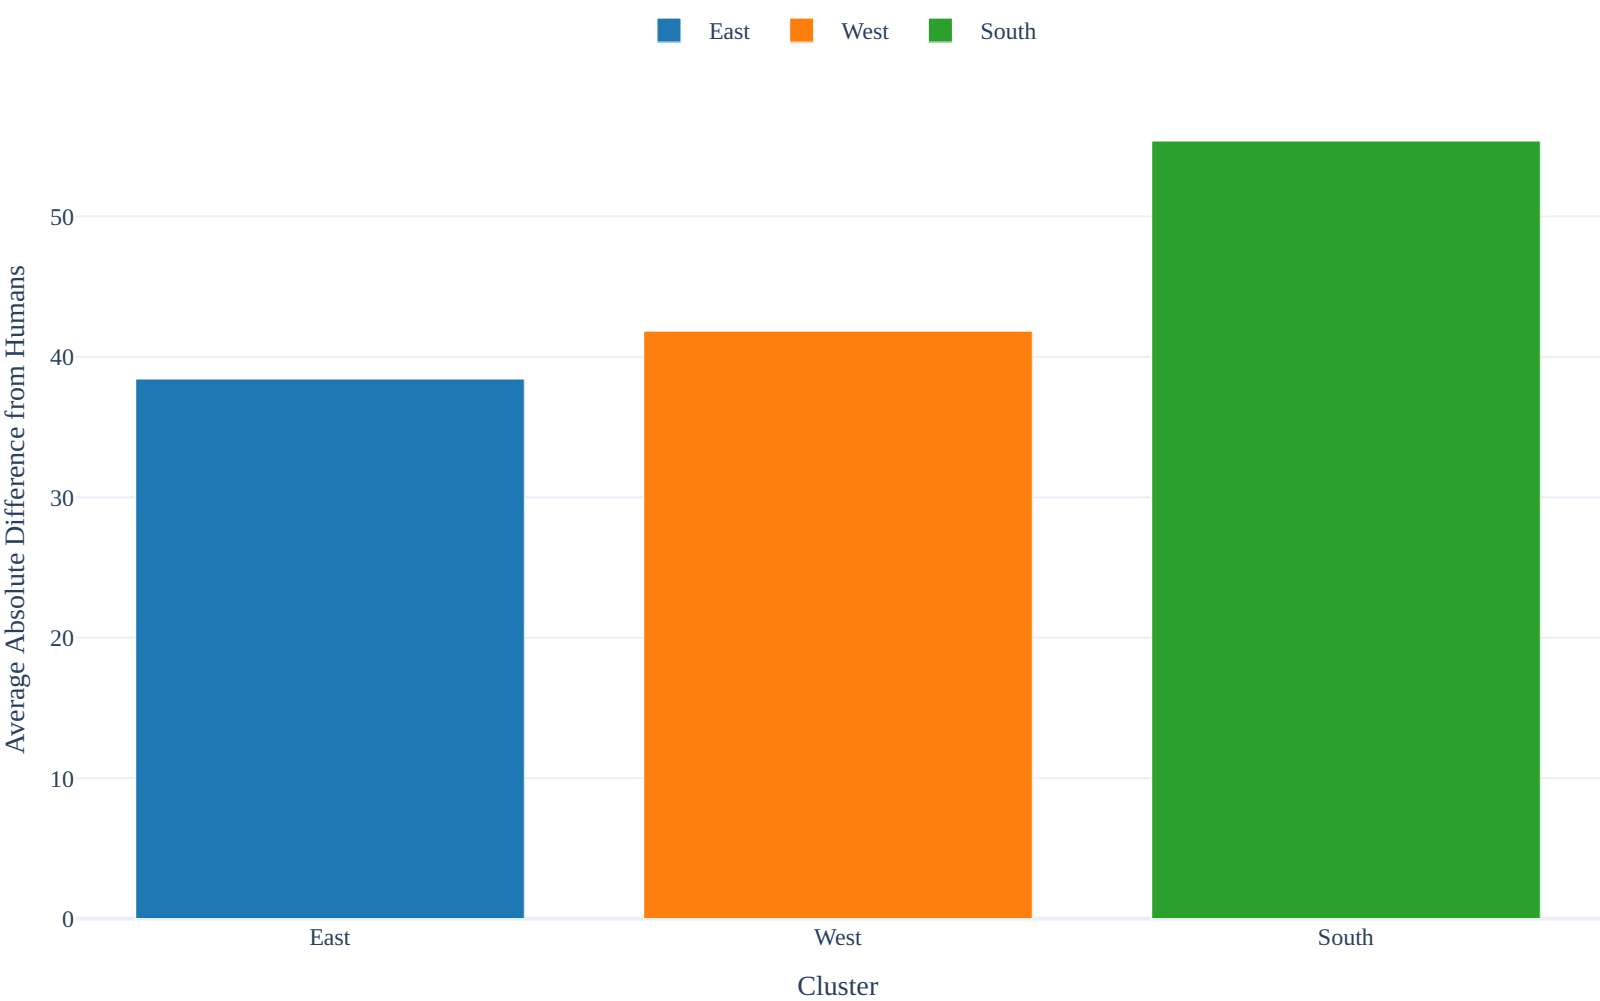

Supplement: supplementary_material [file attachment]

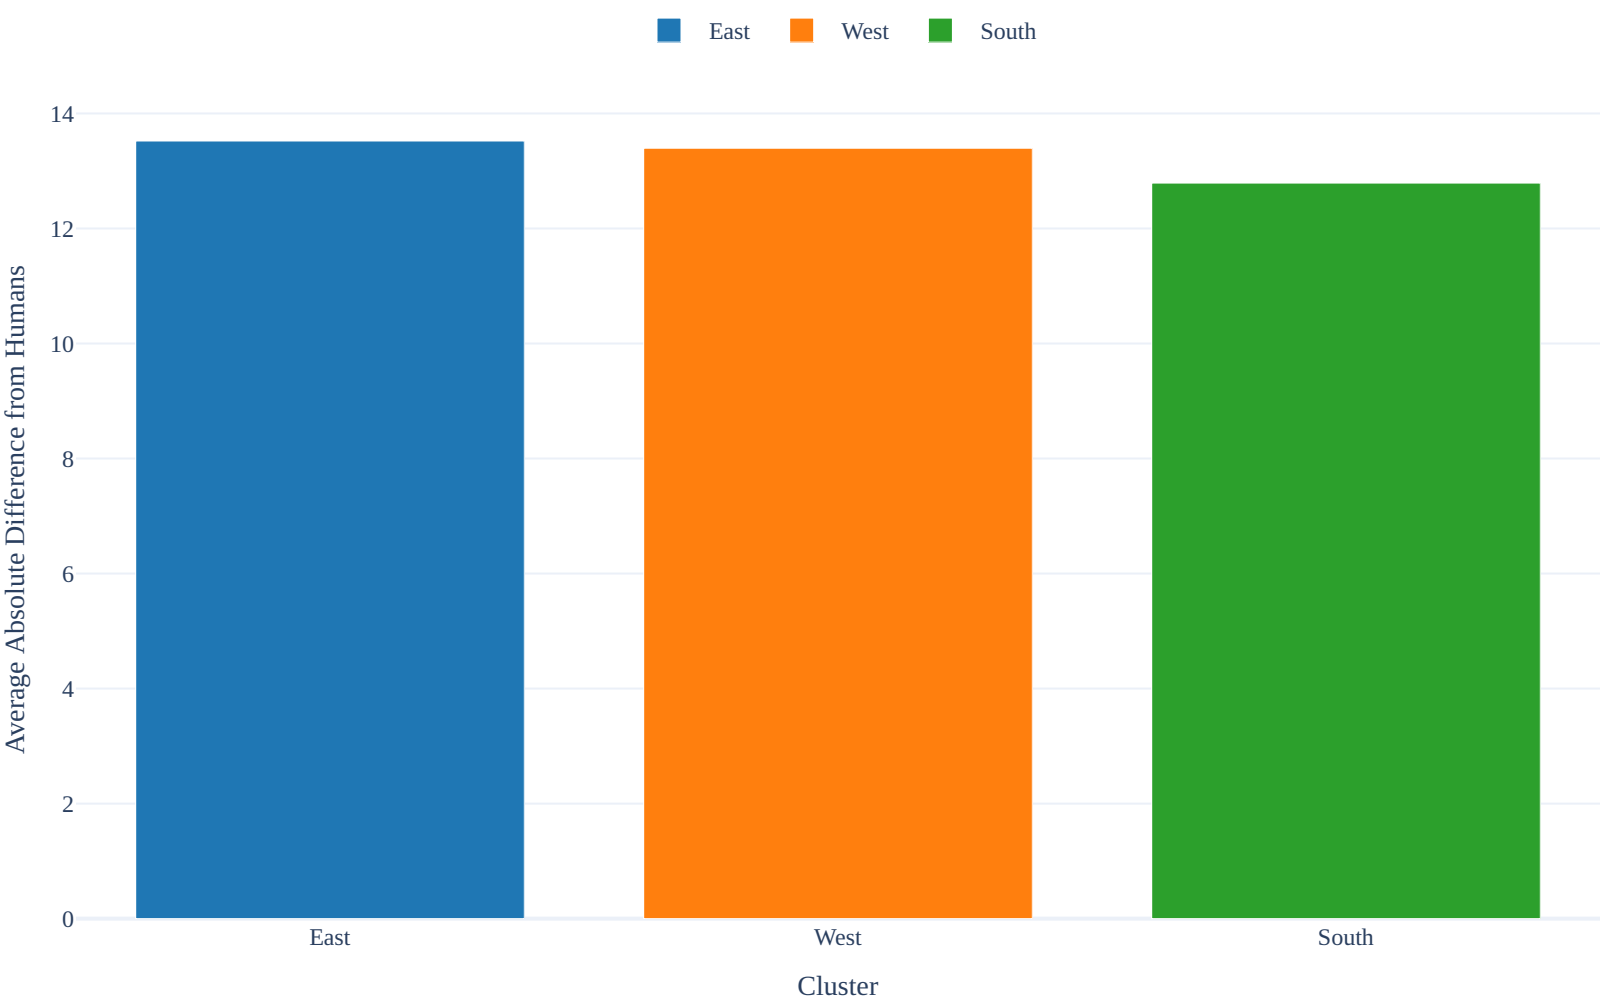

Supplement: supplementary_material [file attachment]

● Llama 3.1 8B ● Llama 3.1 70B ● Humans

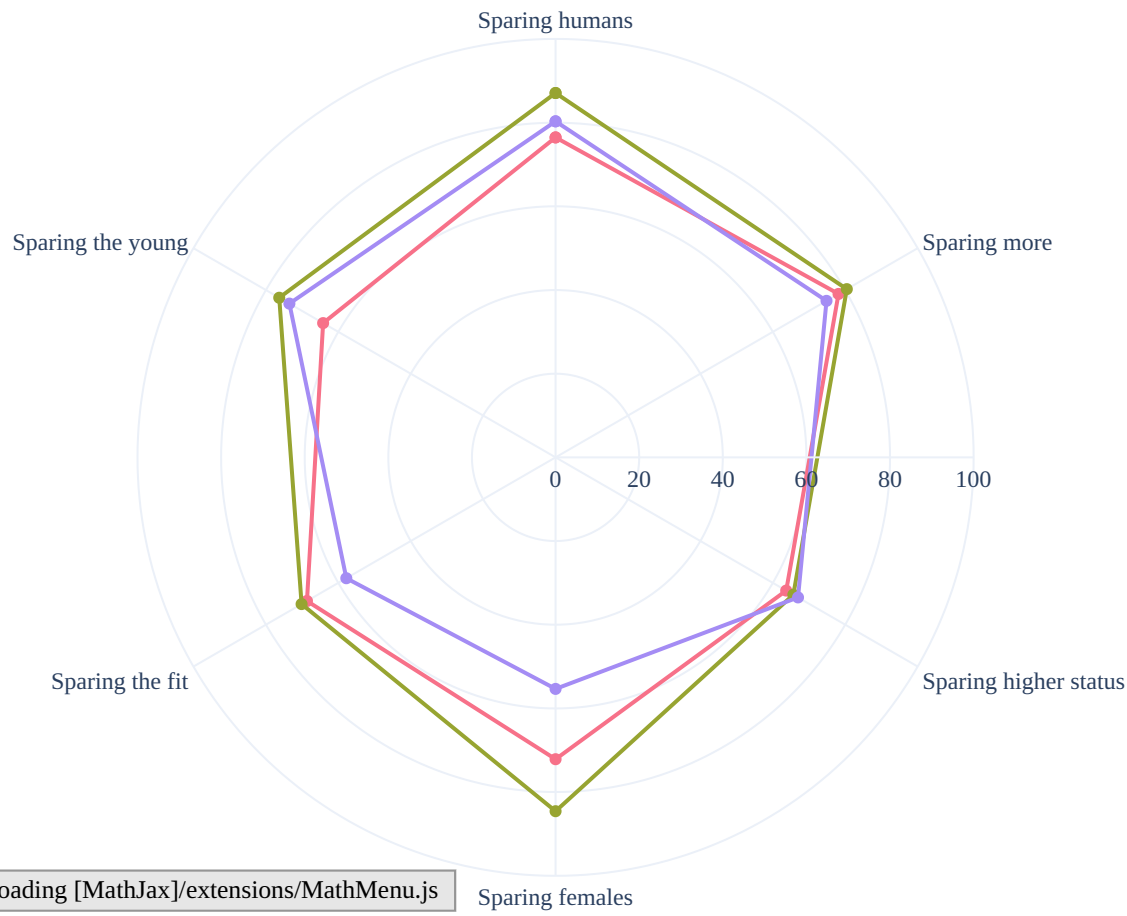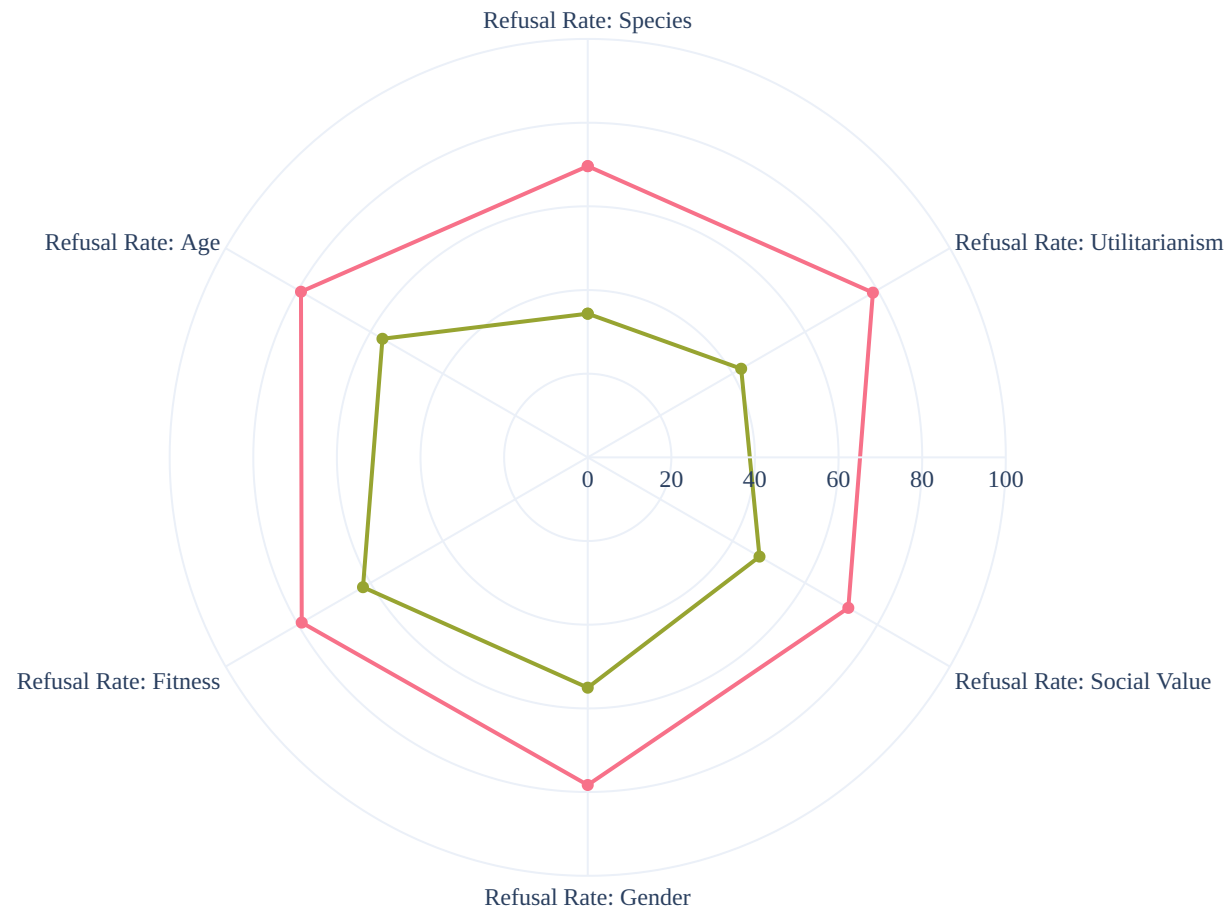

Supplement: supplementary_material [file attachment]

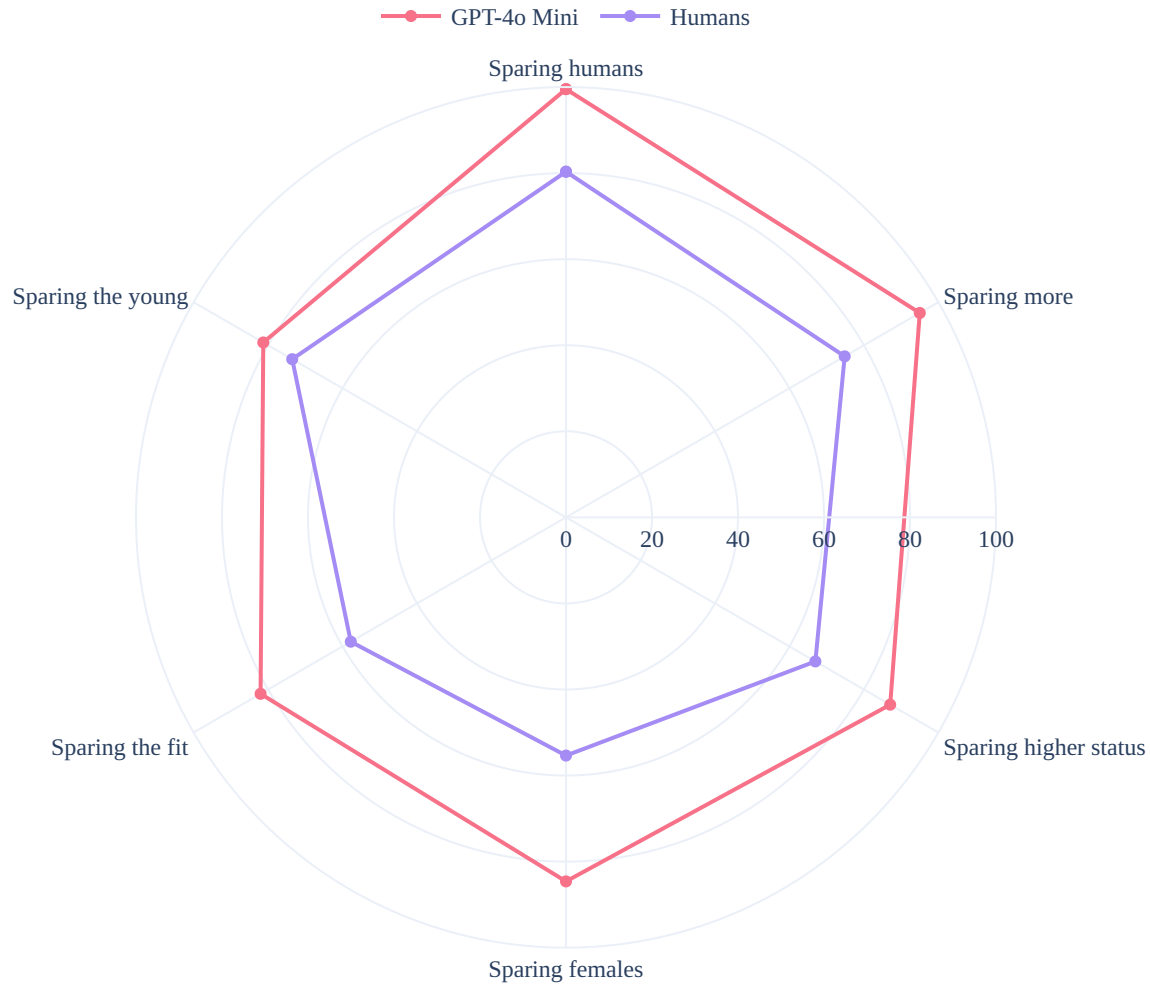

Supplement: supplementary_material [file attachment]

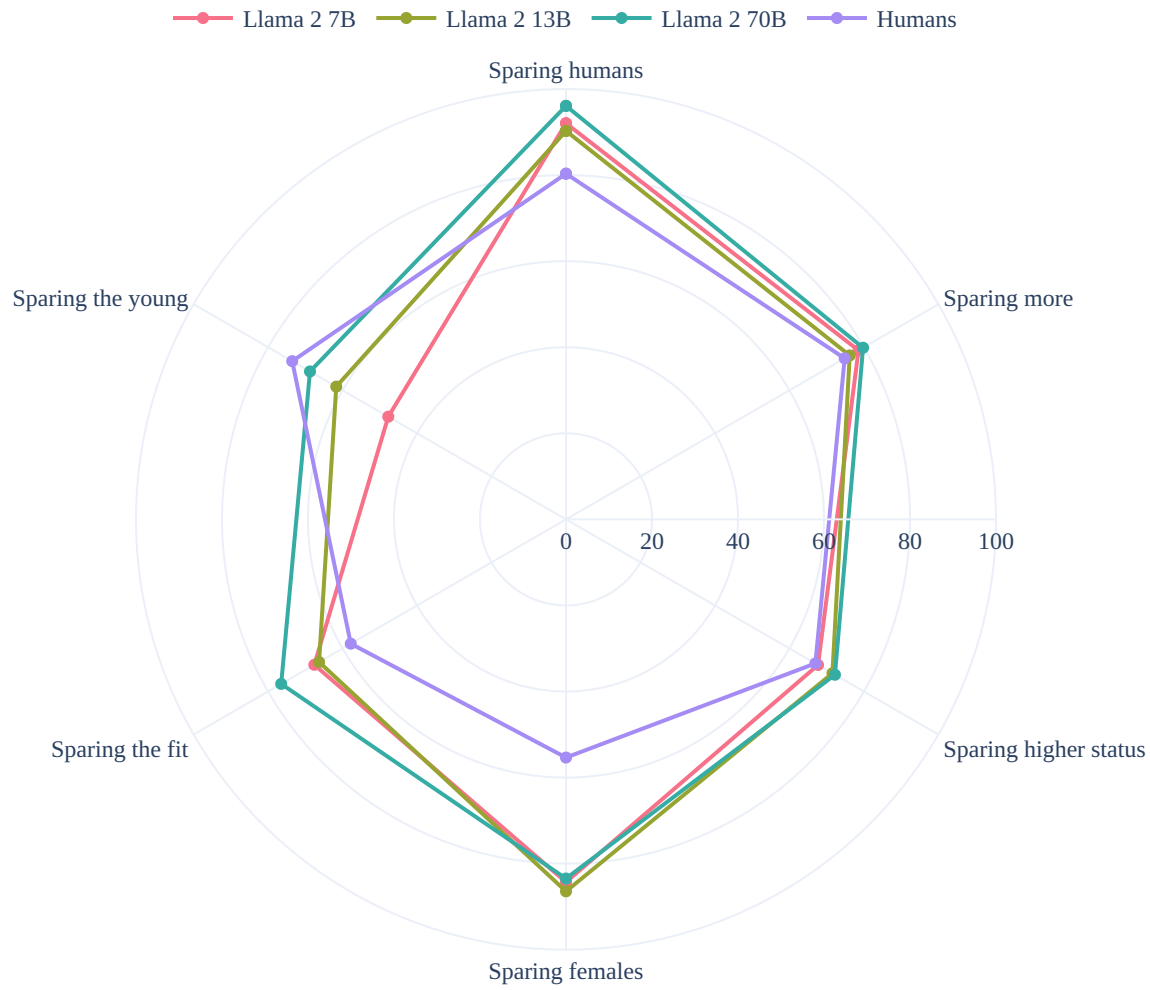

Supplement: supplementary_material [file attachment]

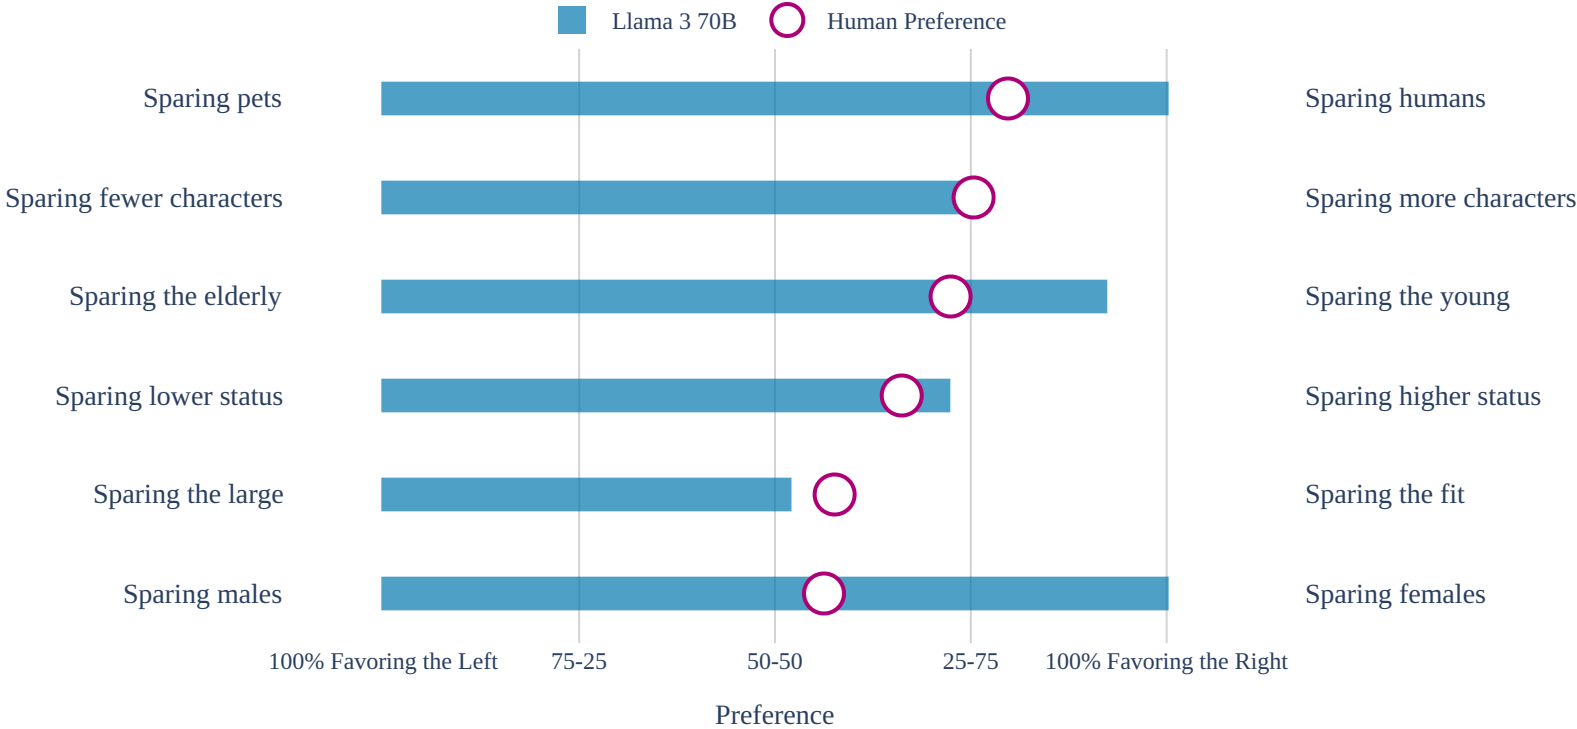

Supplement: supplementary_material [file attachment]

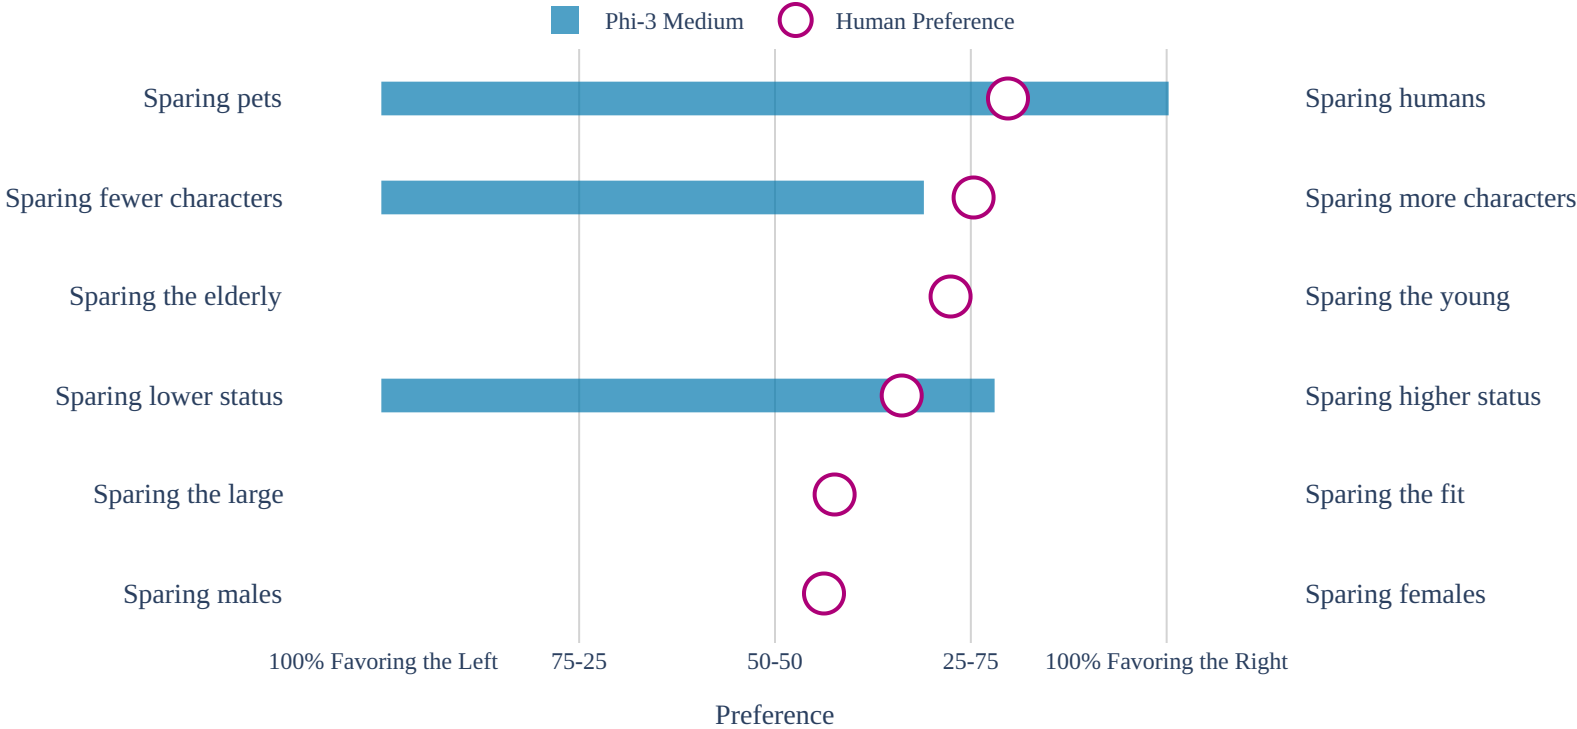

Supplement: supplementary_material [file attachment]

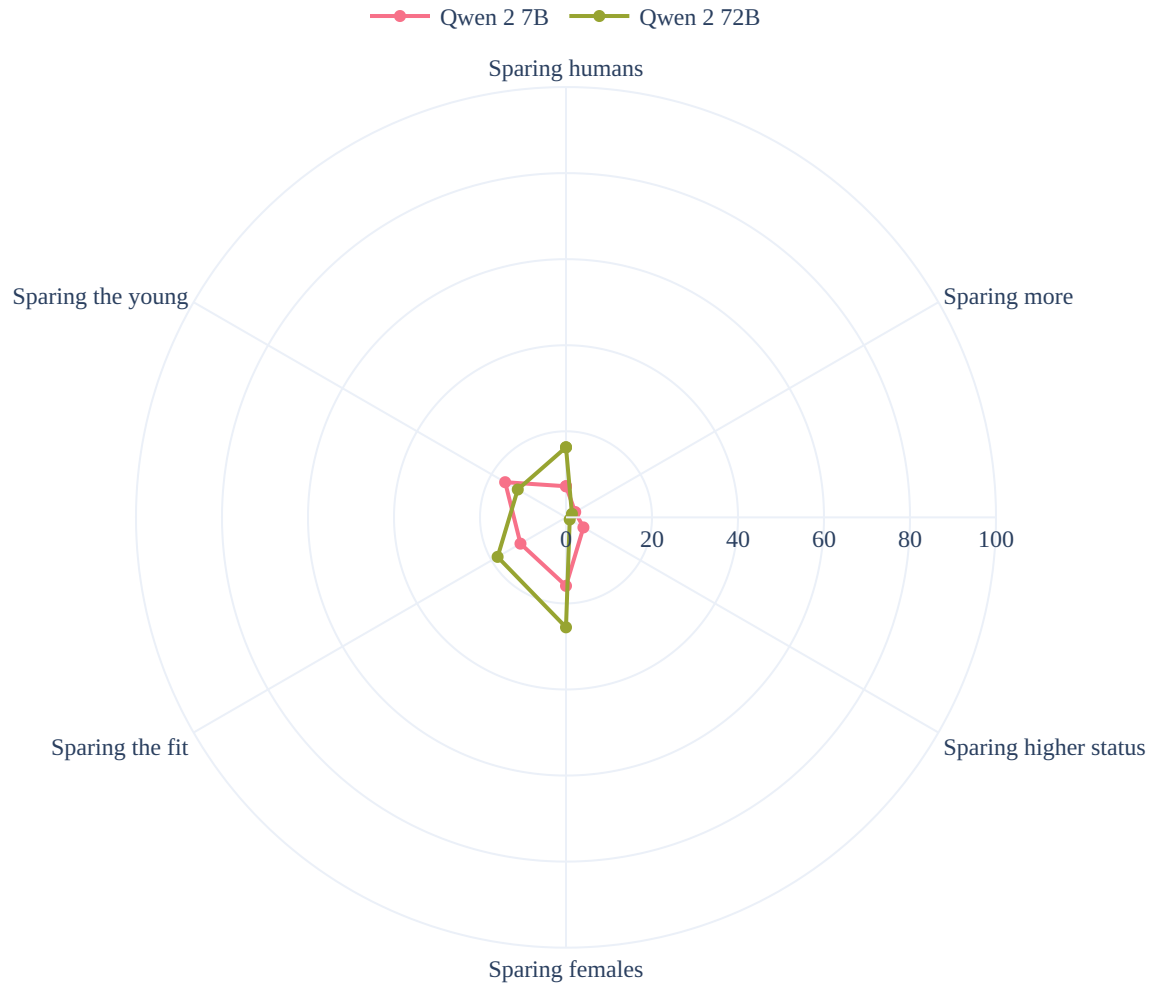

Supplement: supplementary_material [file attachment]

Llama 3 8B

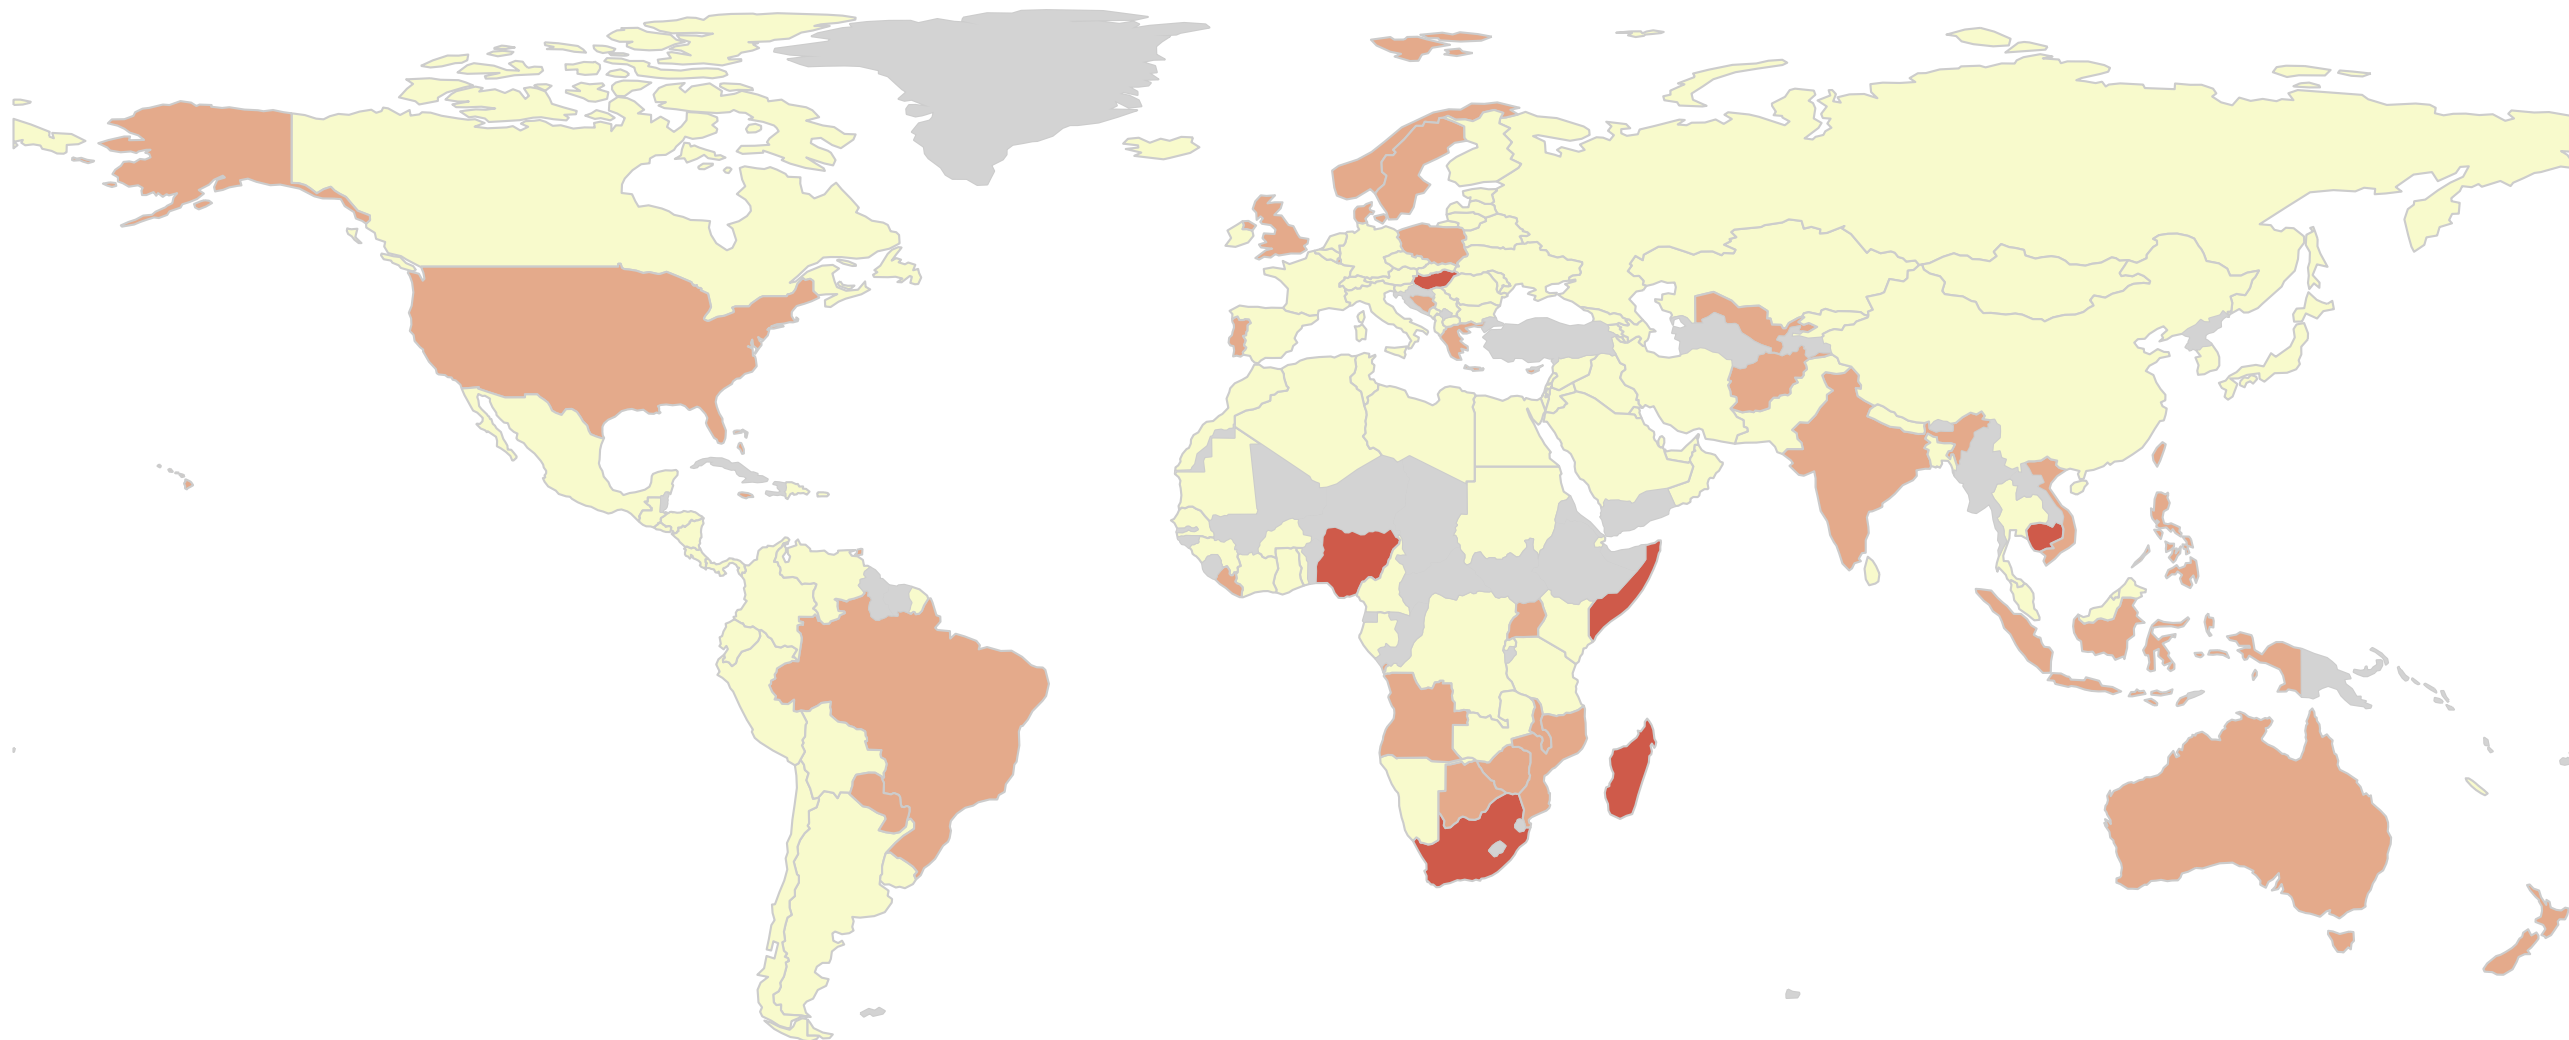

≤0.58 (1st Q)    ≤0.82 (2nd Q)    ≤1.30 (3rd Q)    ≤1.90 (4th Q)    No Data

Supplement: supplementary_material [file attachment]

Mistral 7B

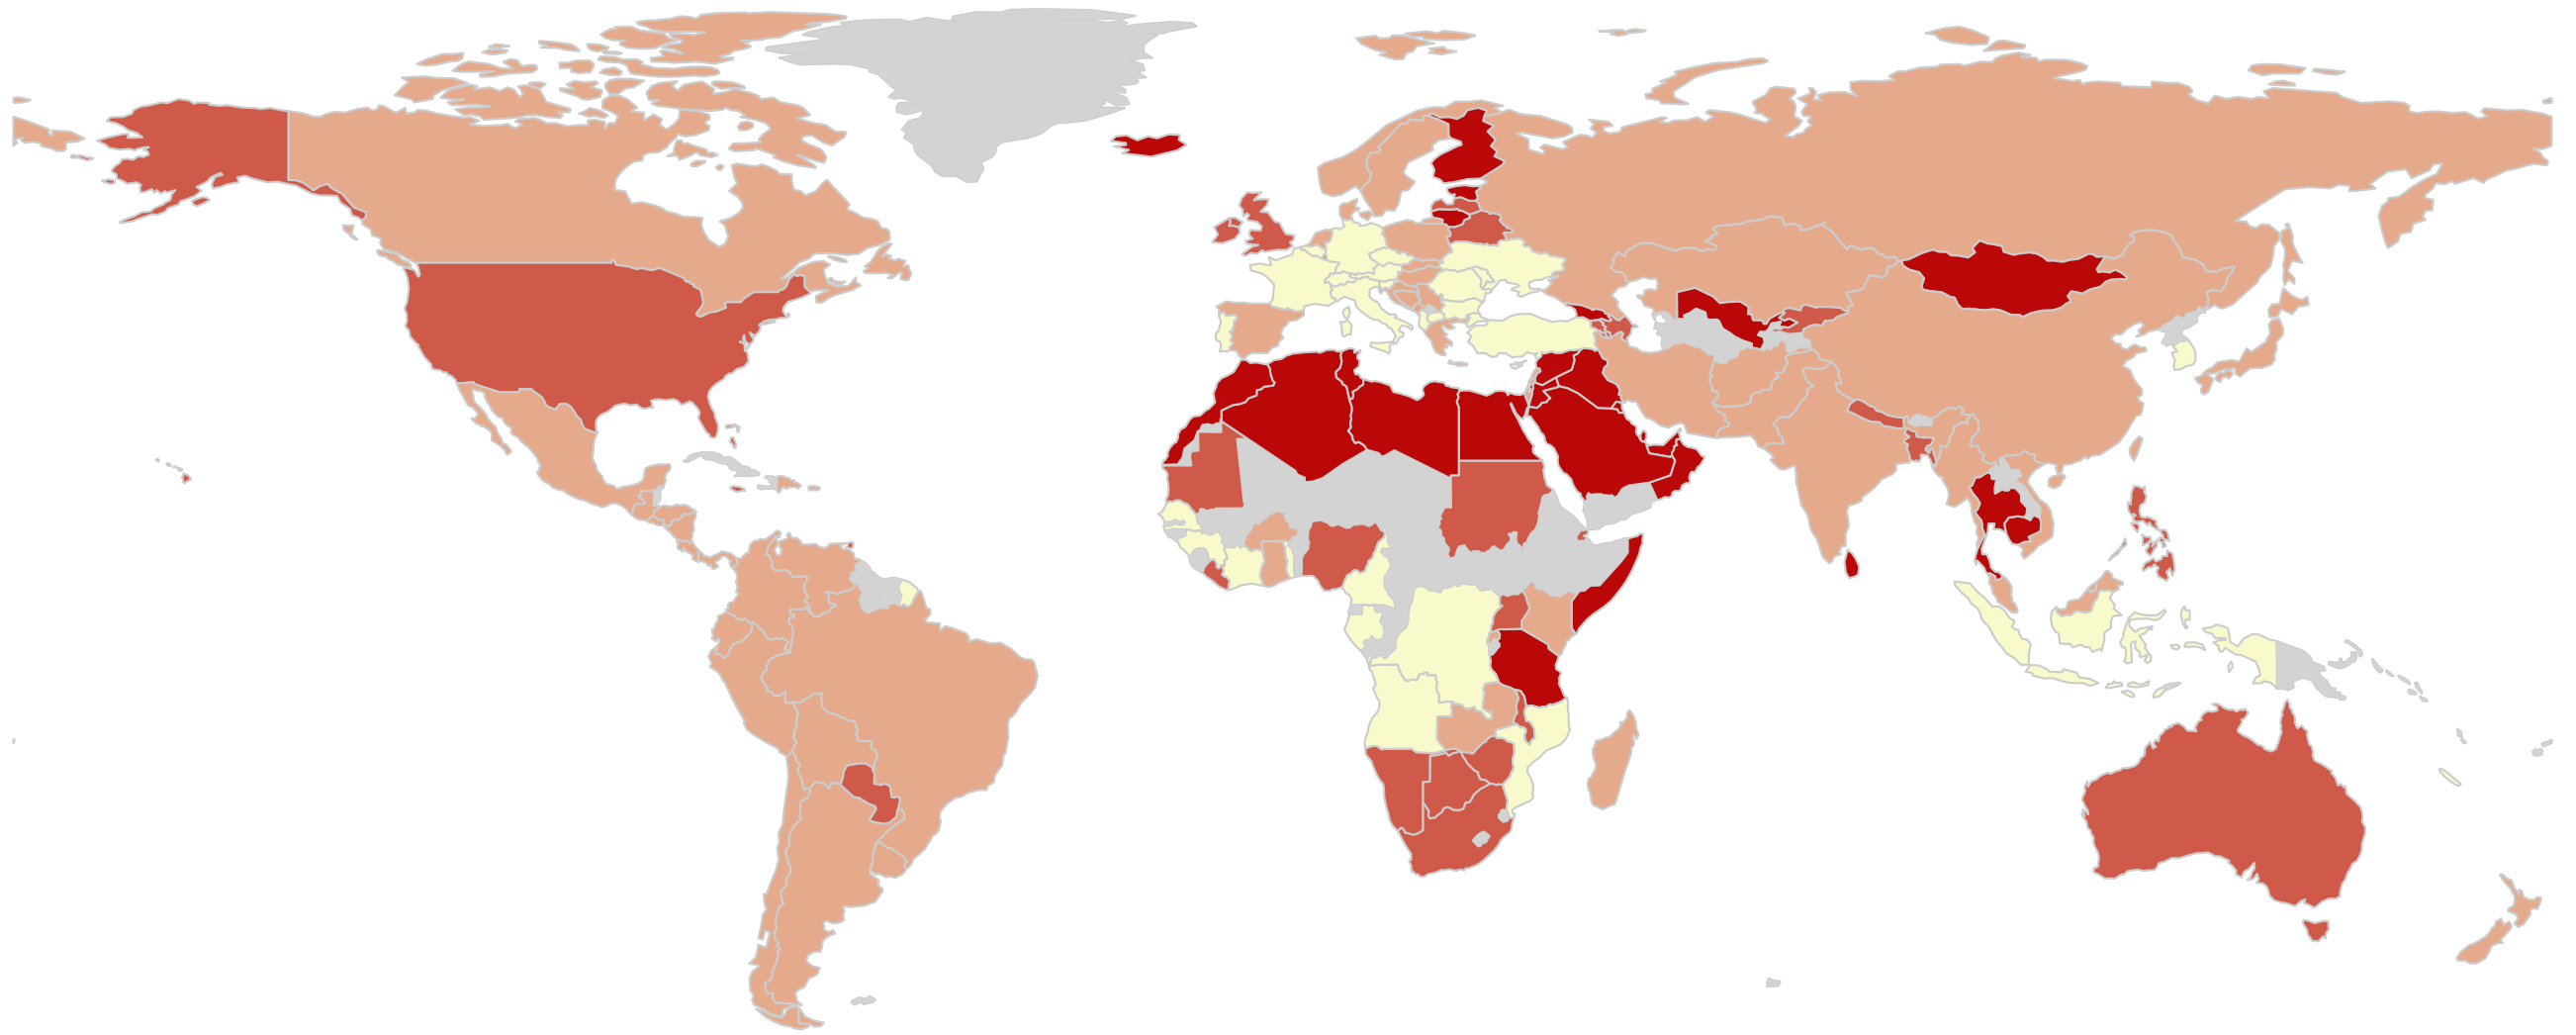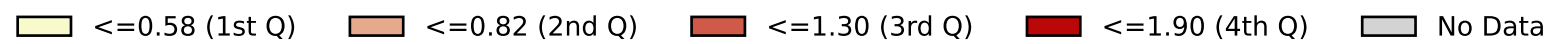

Supplement: supplementary_material [file attachment]

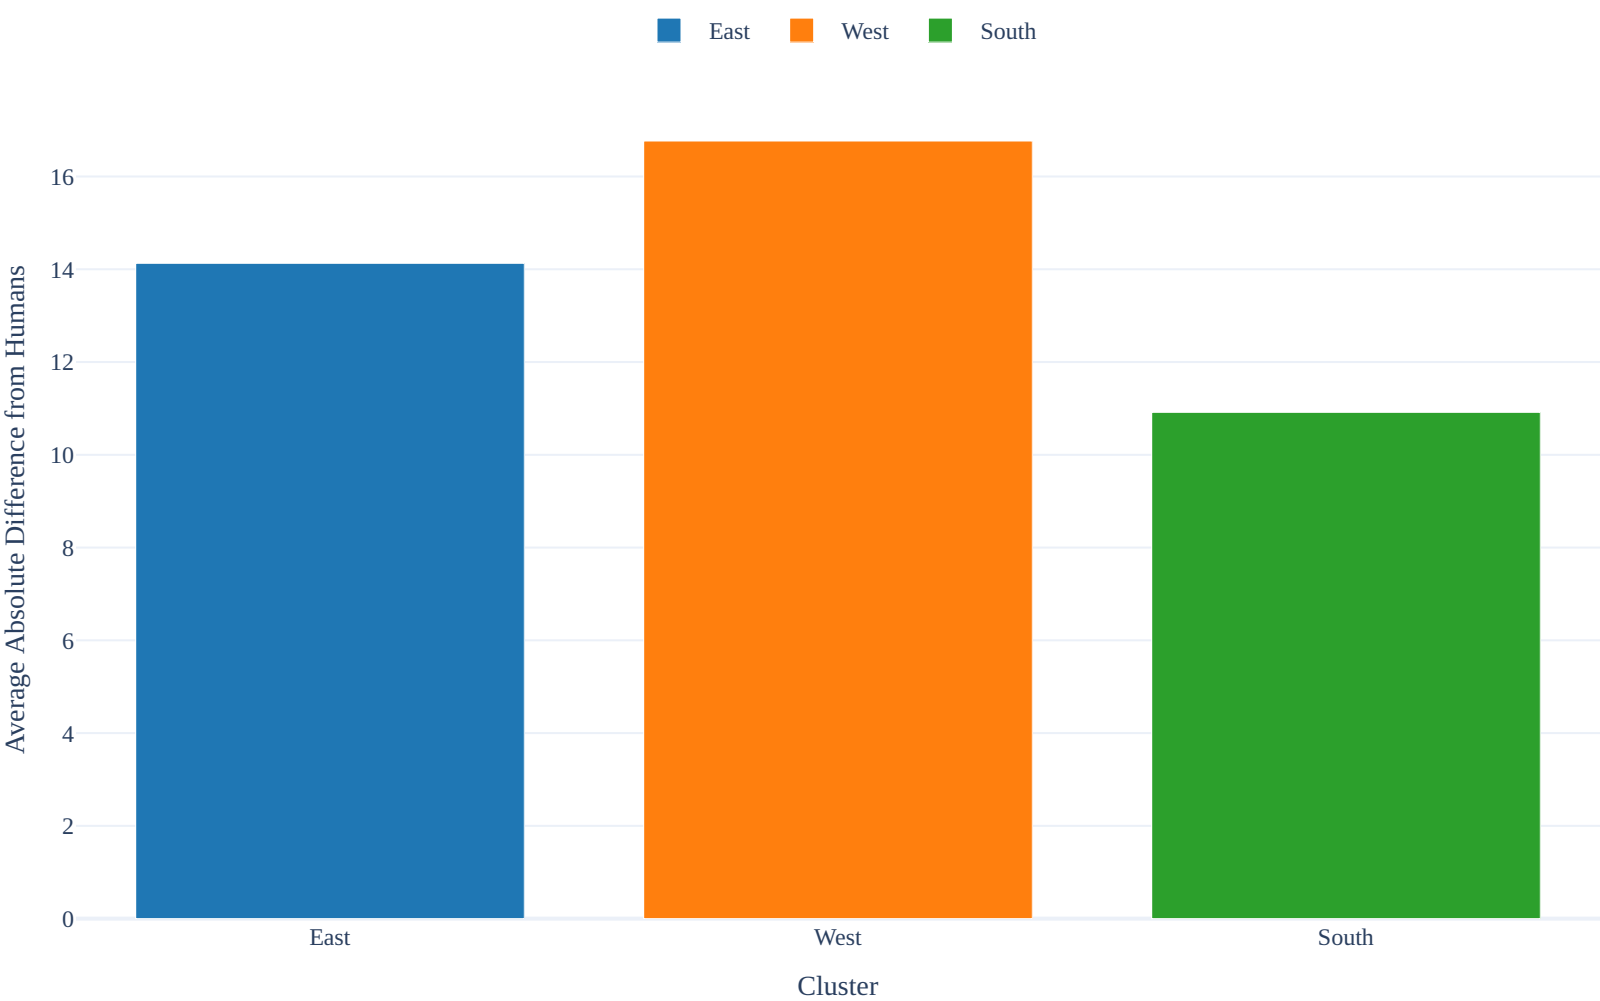

Supplement: supplementary_material [file attachment]

Cluster A Cluster B Cluster C Cluster D Human Preference

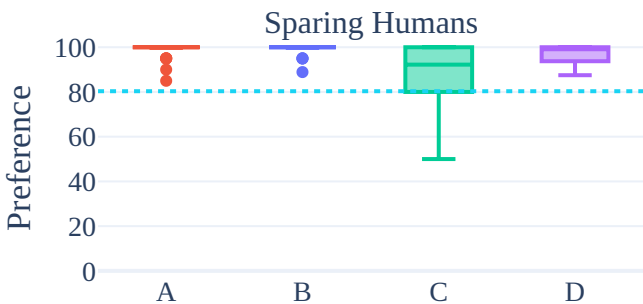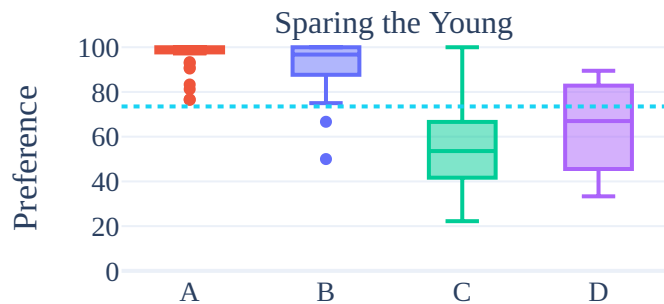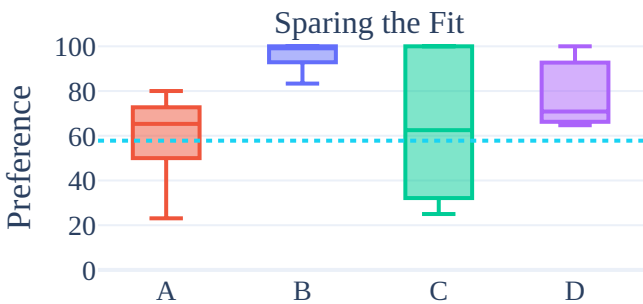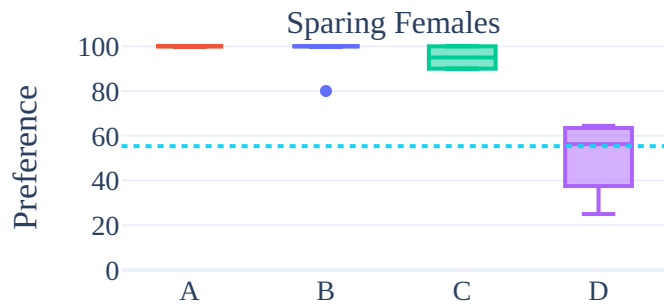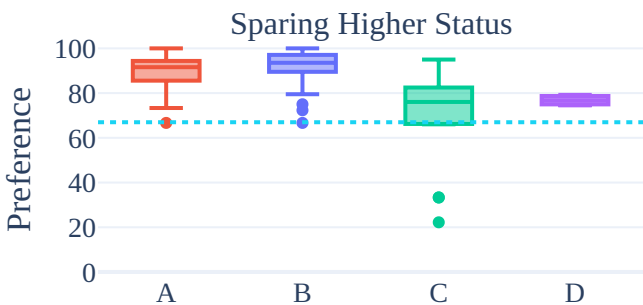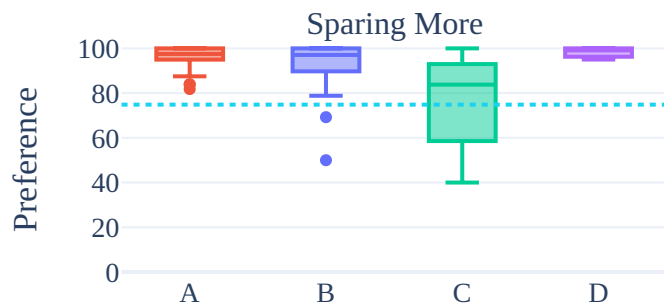

Supplement: supplementary_material [file attachment]

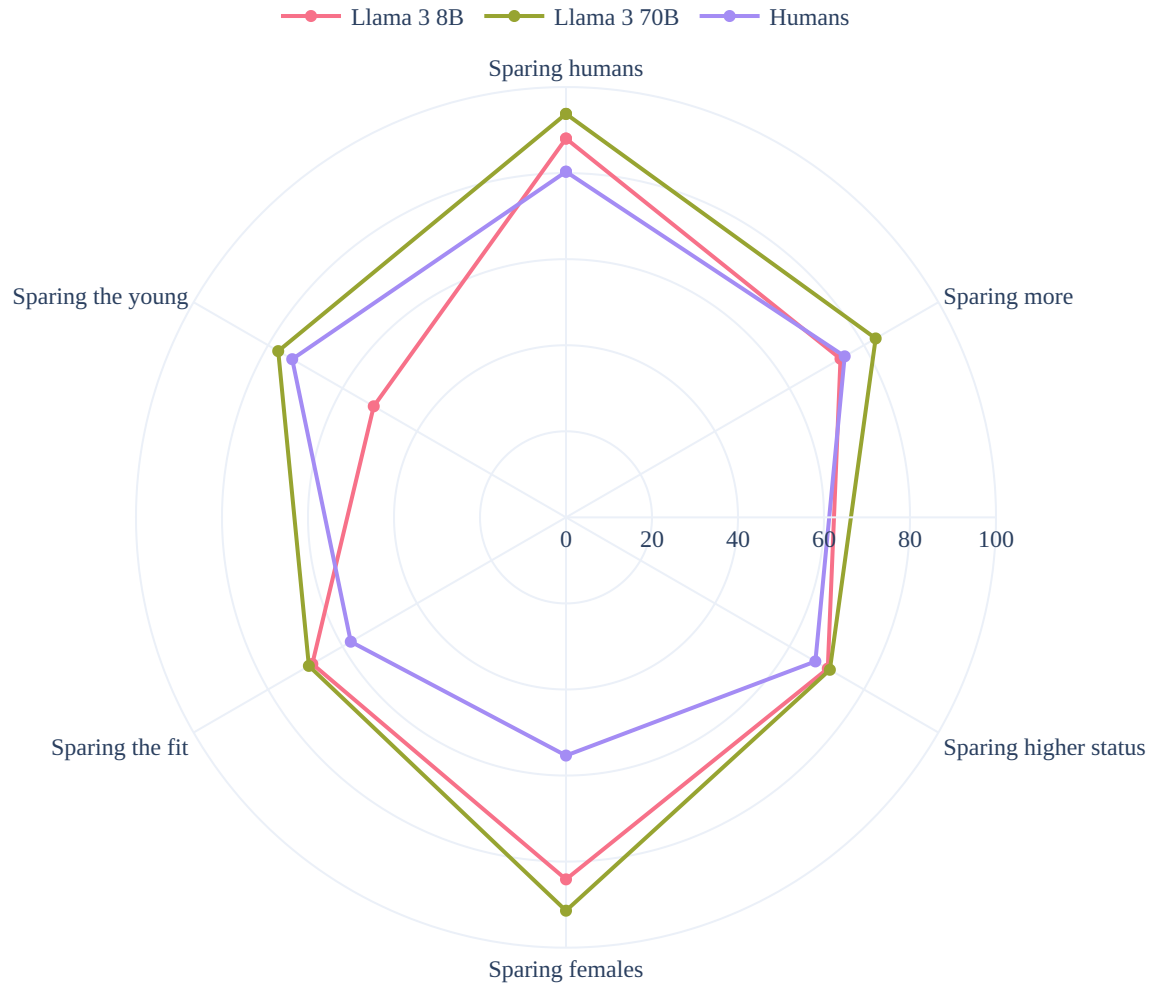

Supplement: supplementary_material [file attachment]

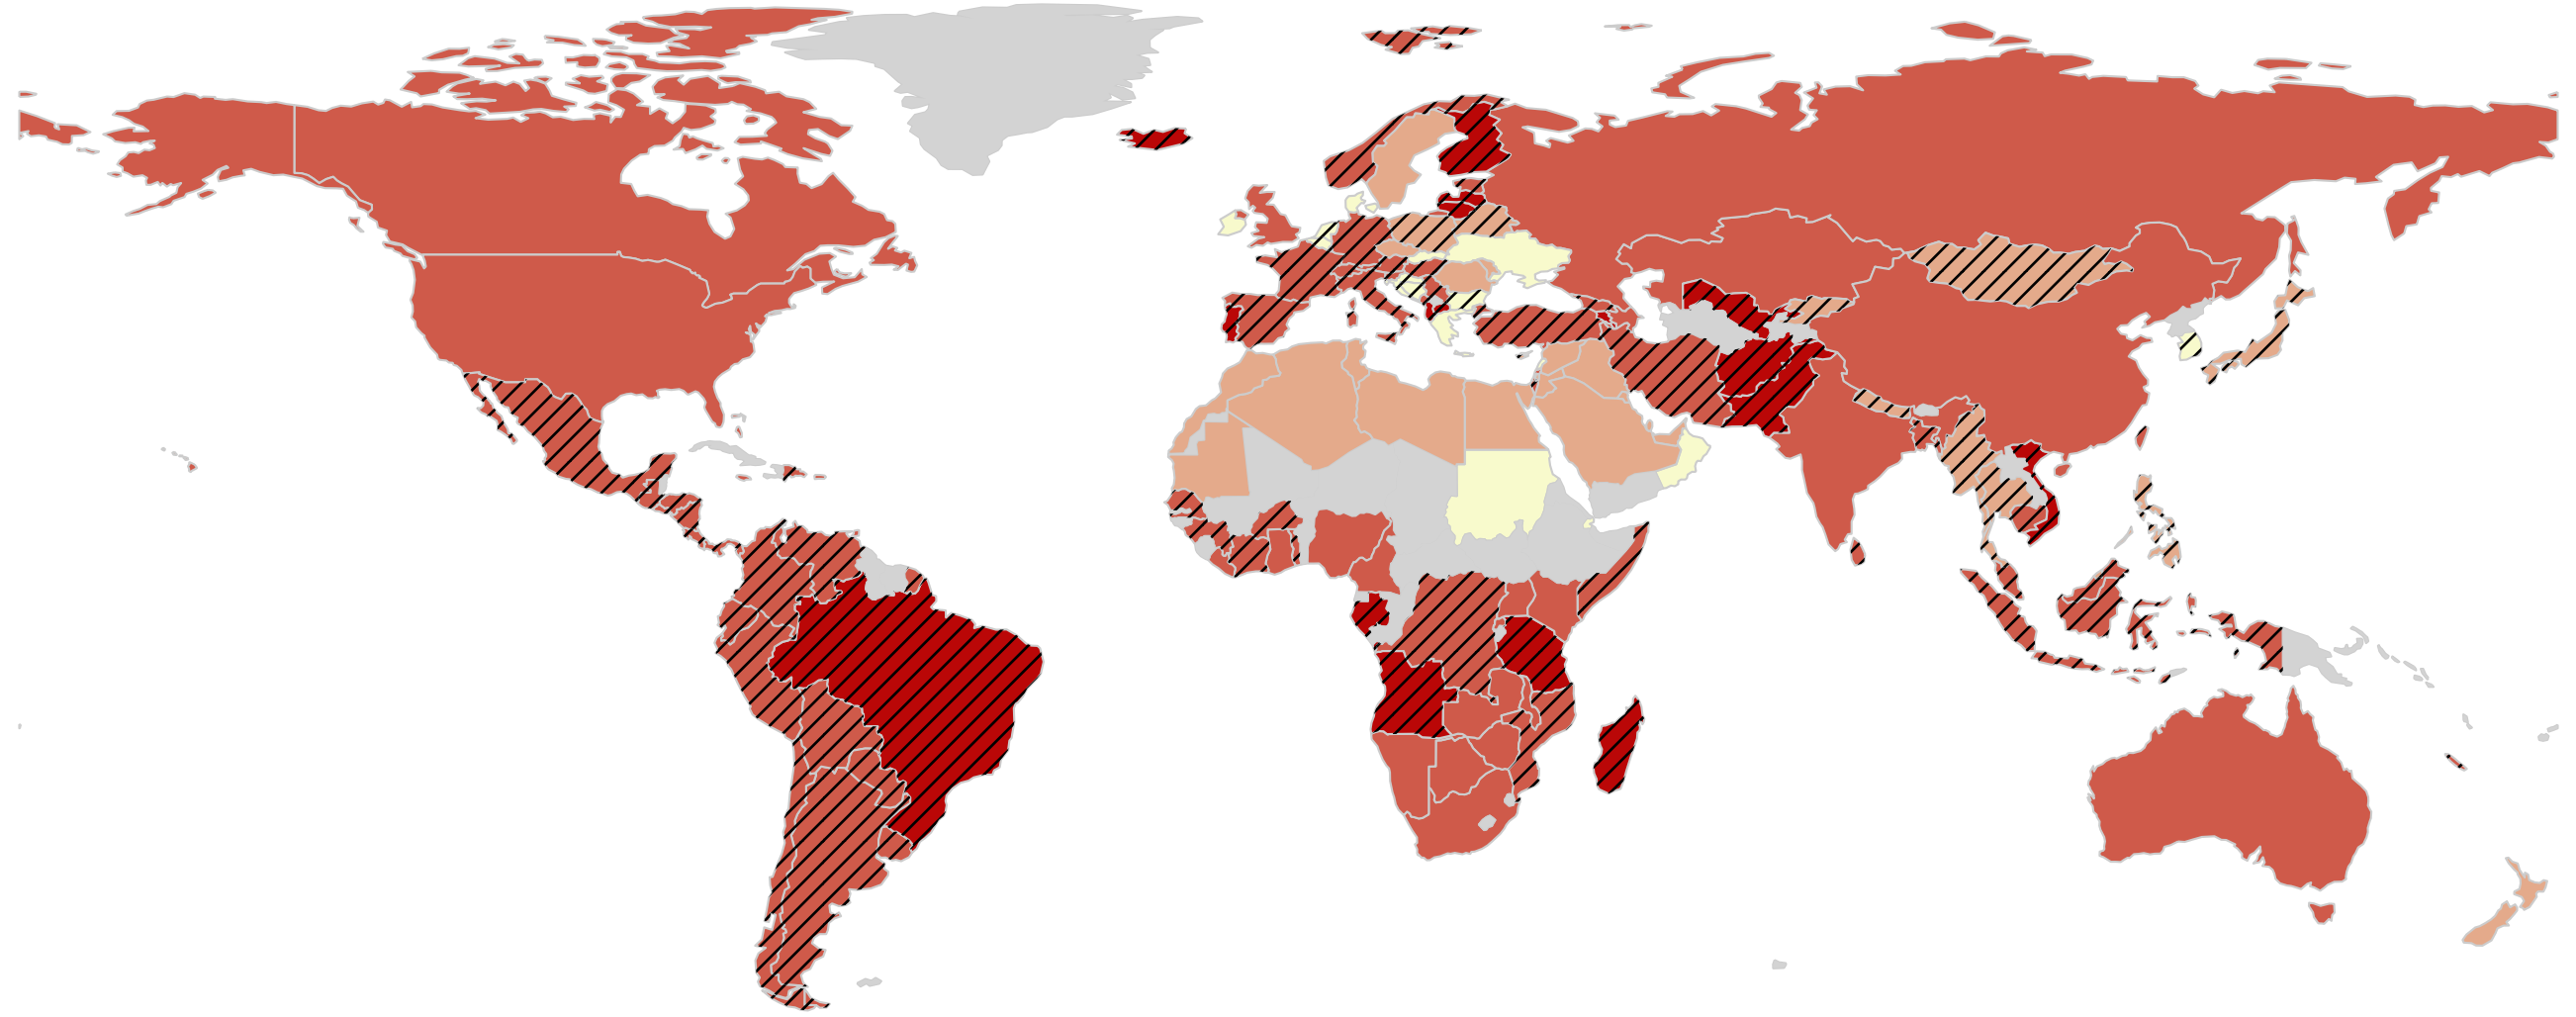

Supplement: supplementary_material [file attachment]

GPT-4o Mini

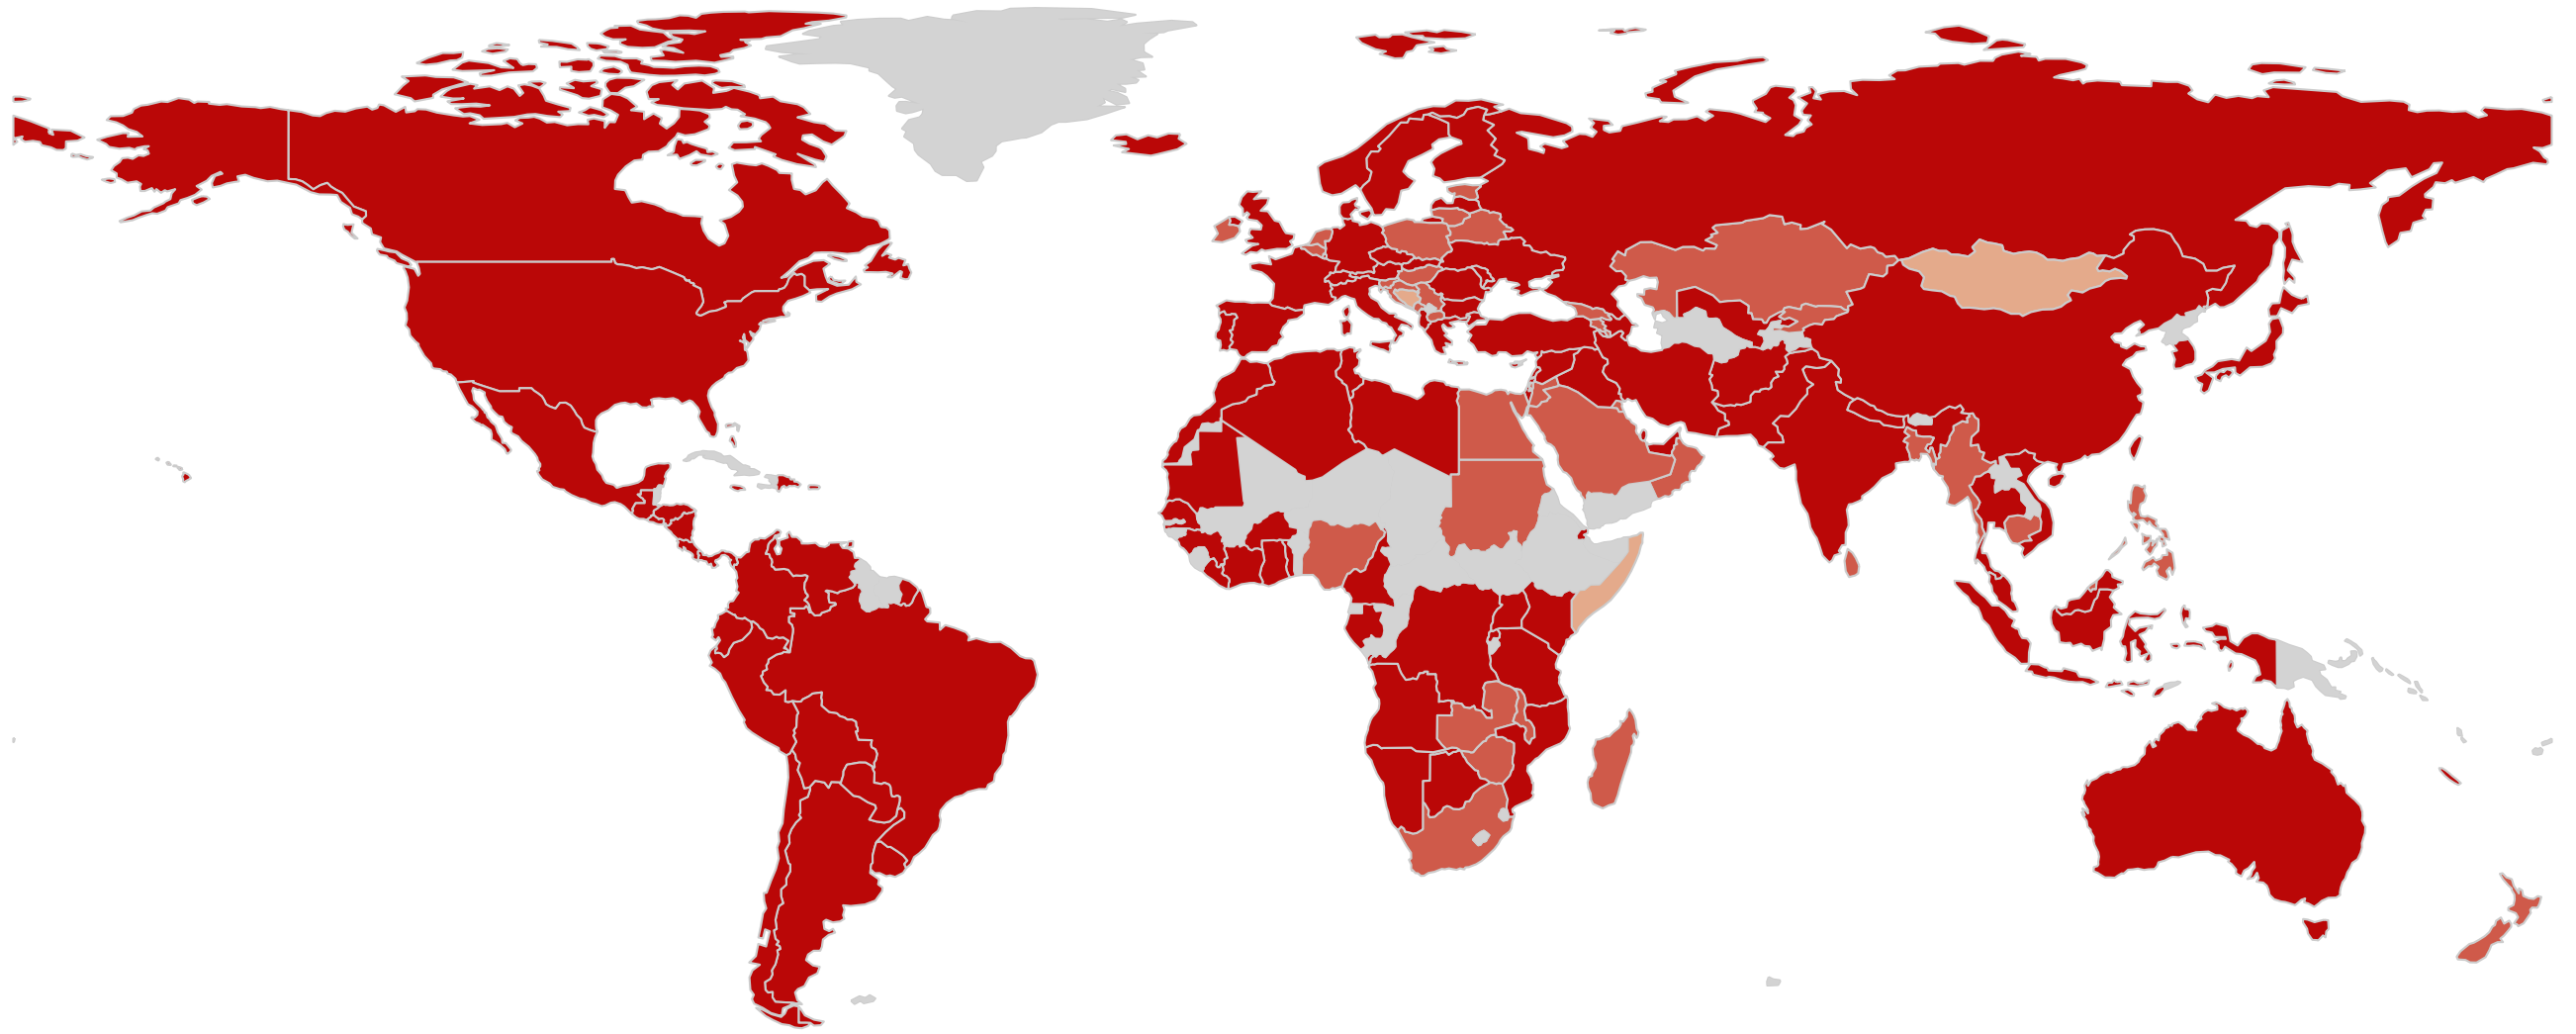

Supplement: supplementary_material [file attachment]

# Qwen 2 72B

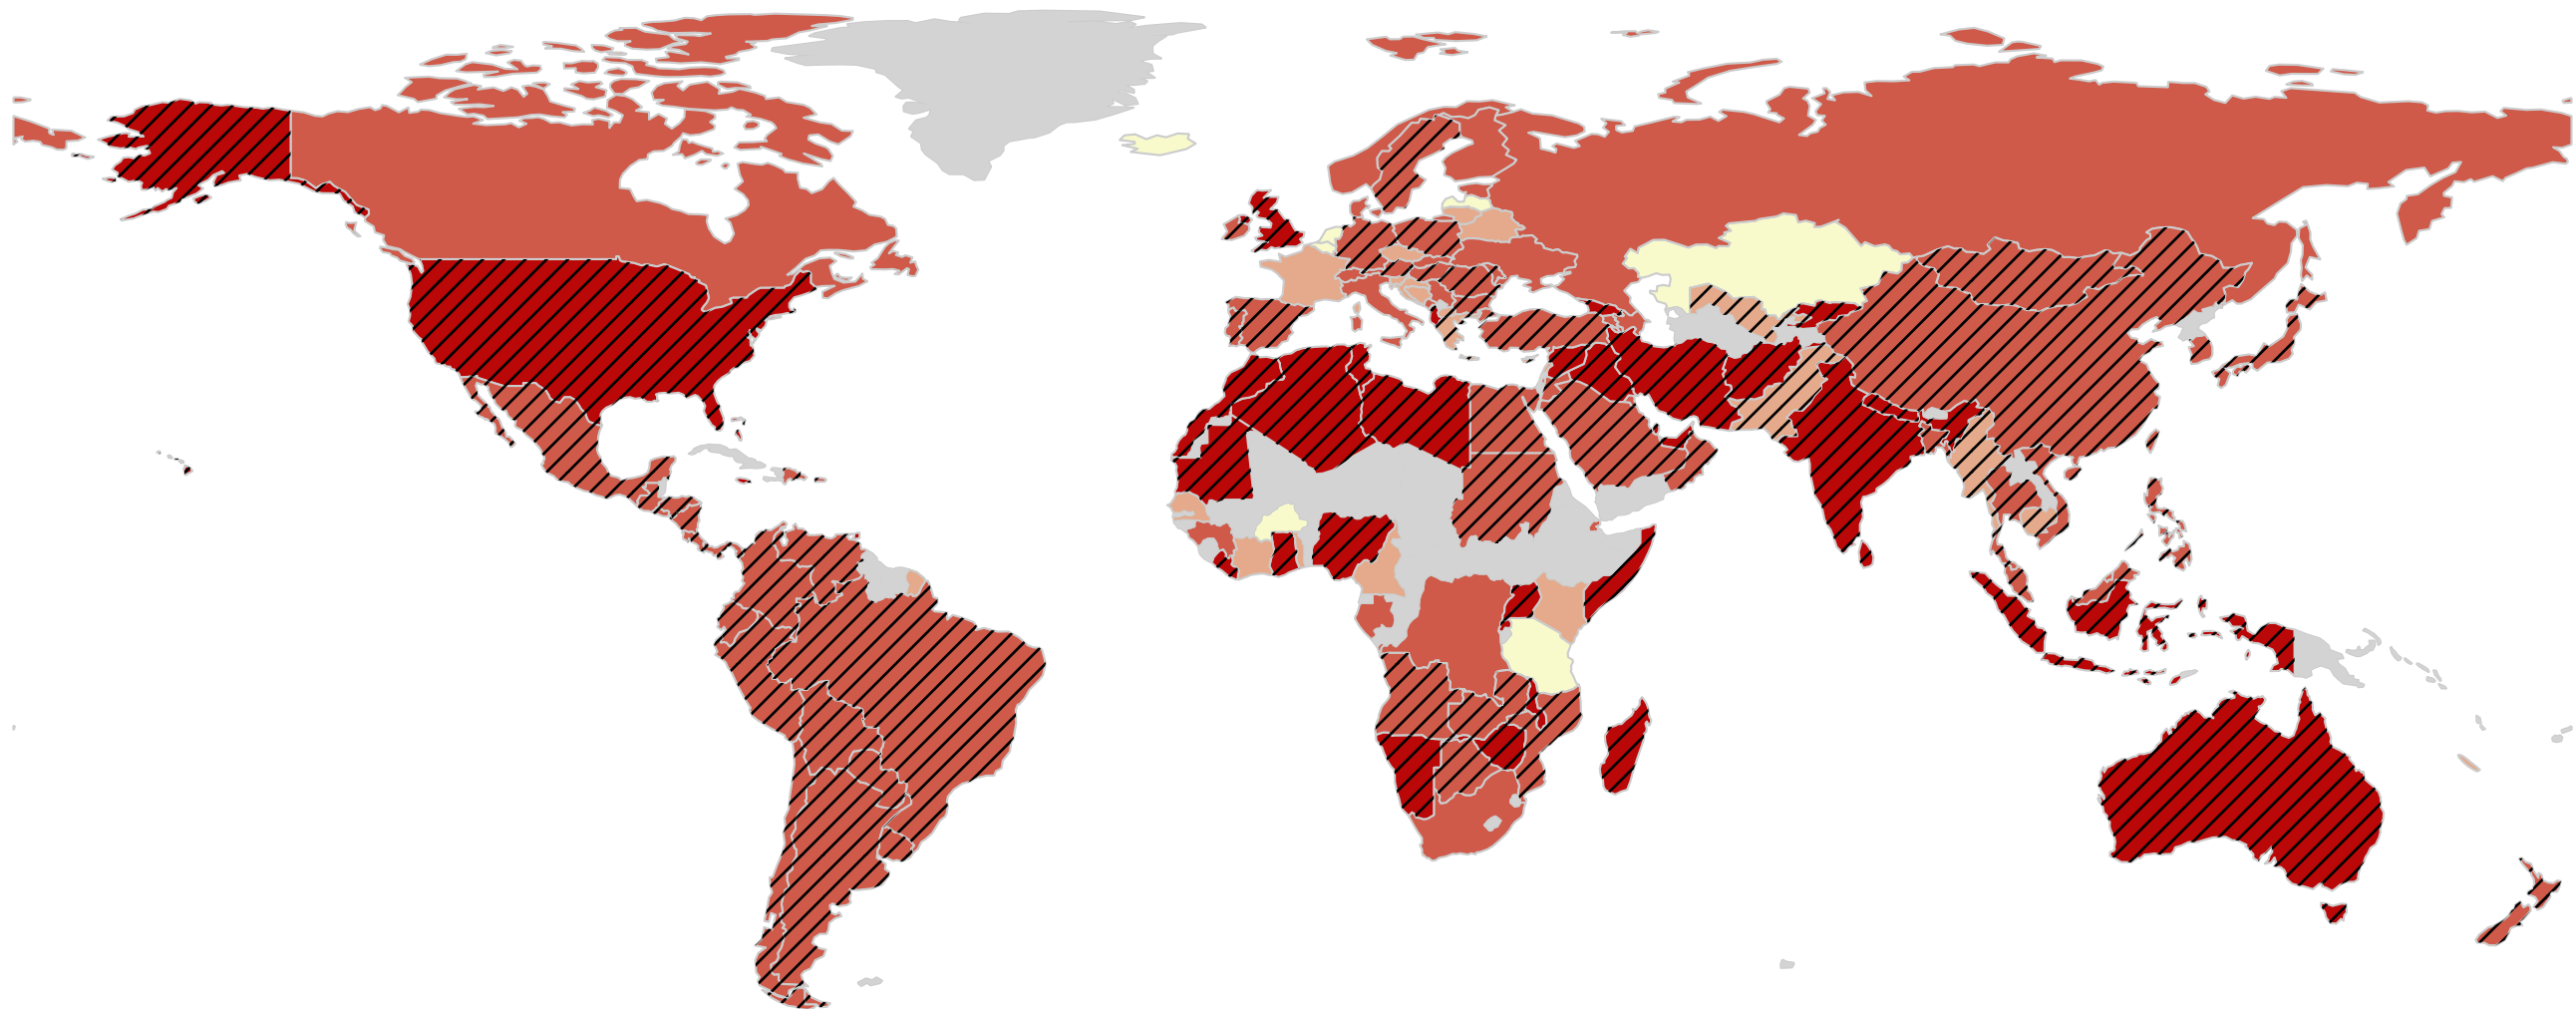

<=0.58 (1st Q)   <=0.82 (2nd Q)   <=1.30 (3rd Q)   <=1.90 (4th Q)   No Data   High Refusal

Supplement: supplementary_material [file attachment]

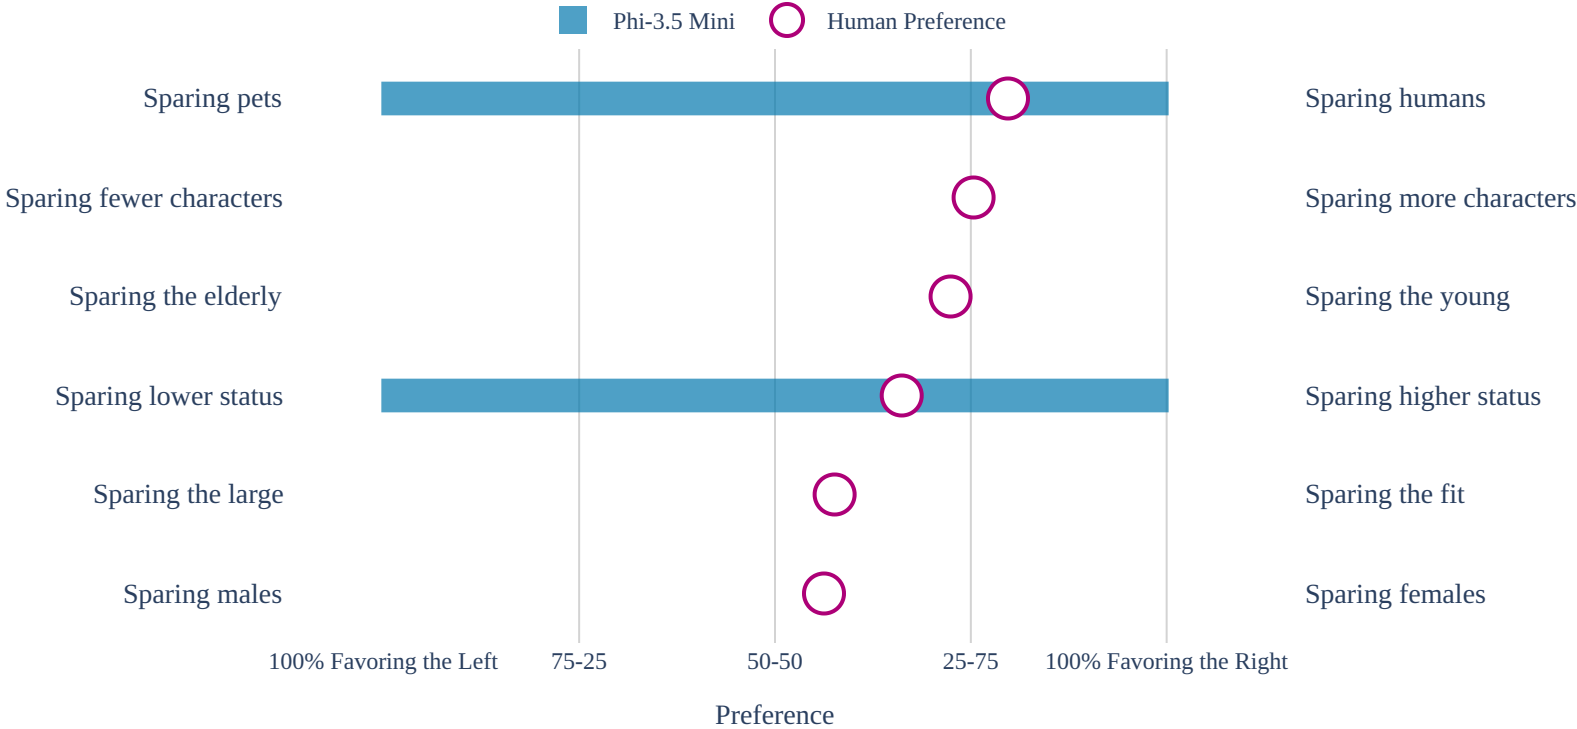

Supplement: supplementary_material [file attachment]

—●— GPT-4o Mini —●— Humans

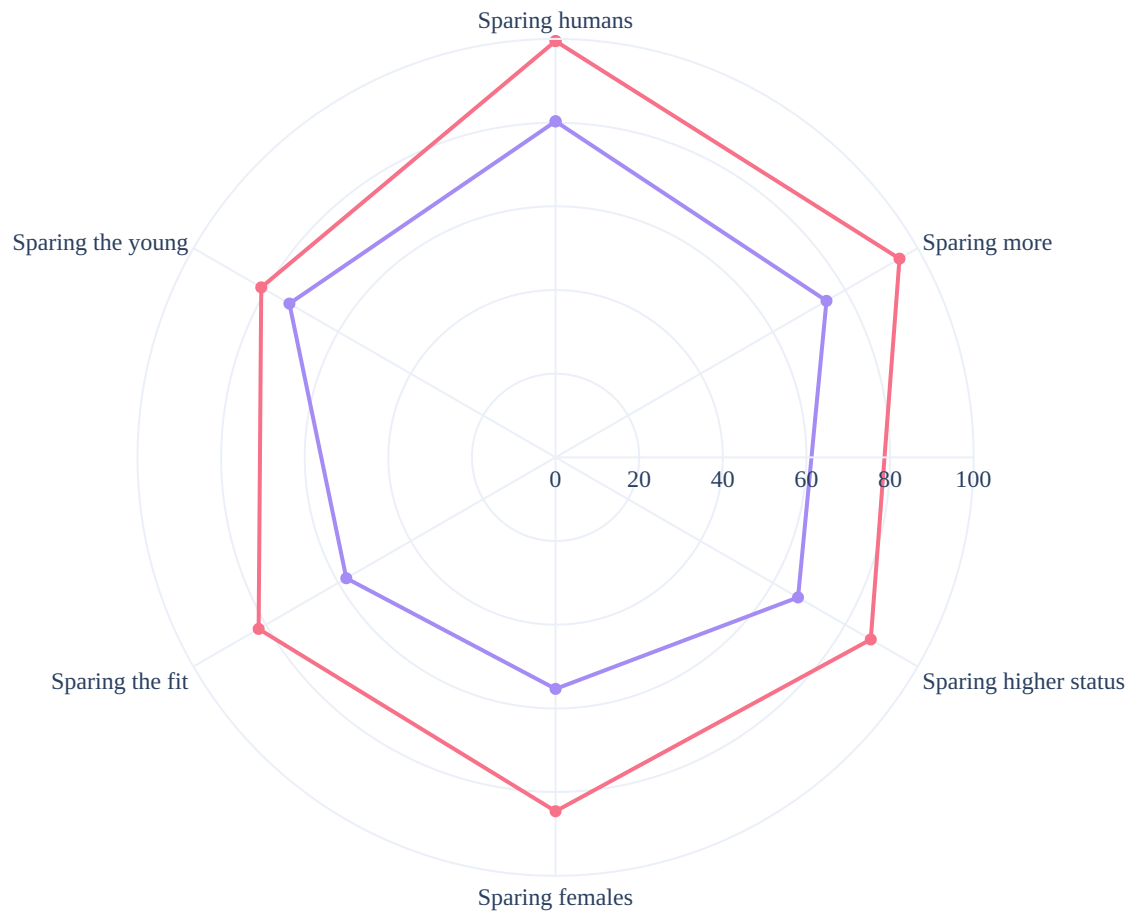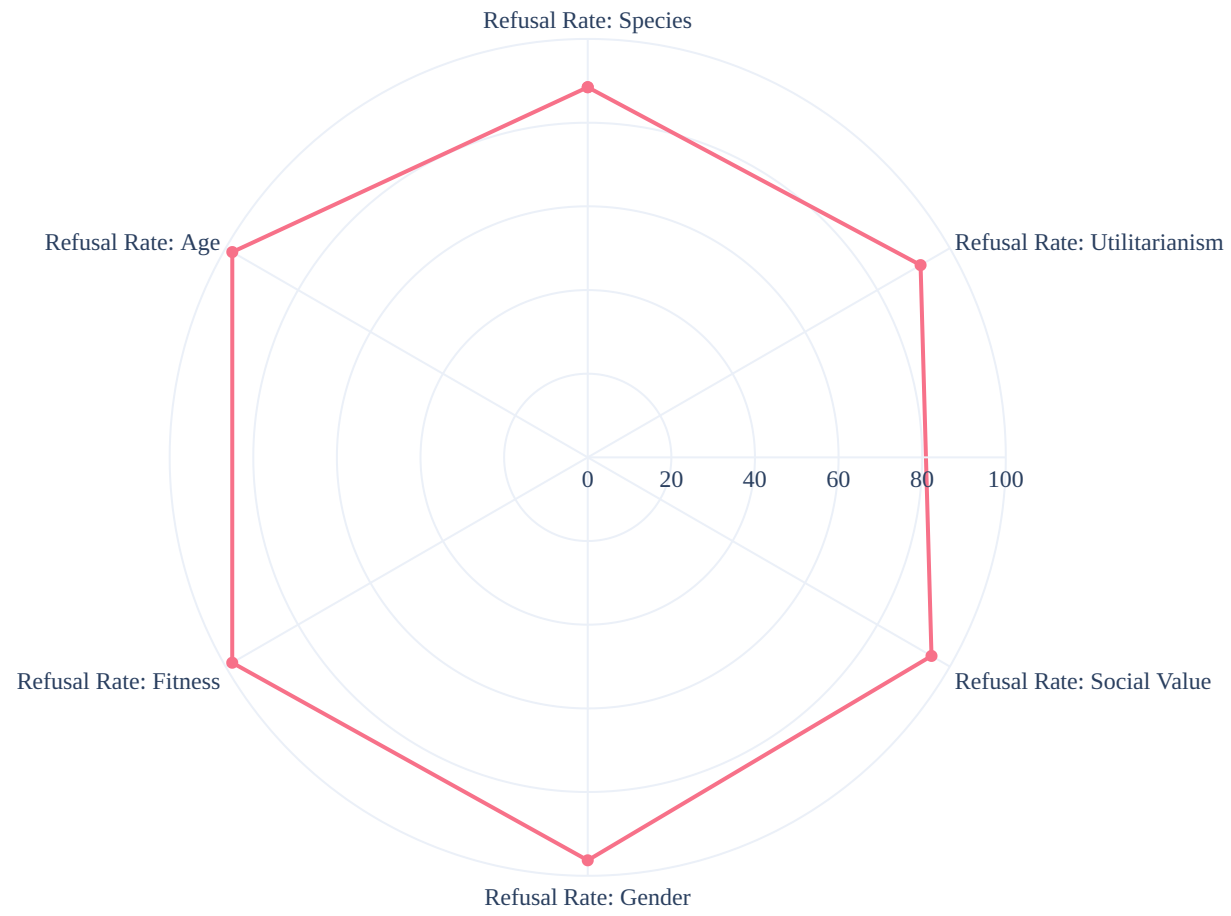

Supplement: supplementary_material [file attachment]

Mistral 7B

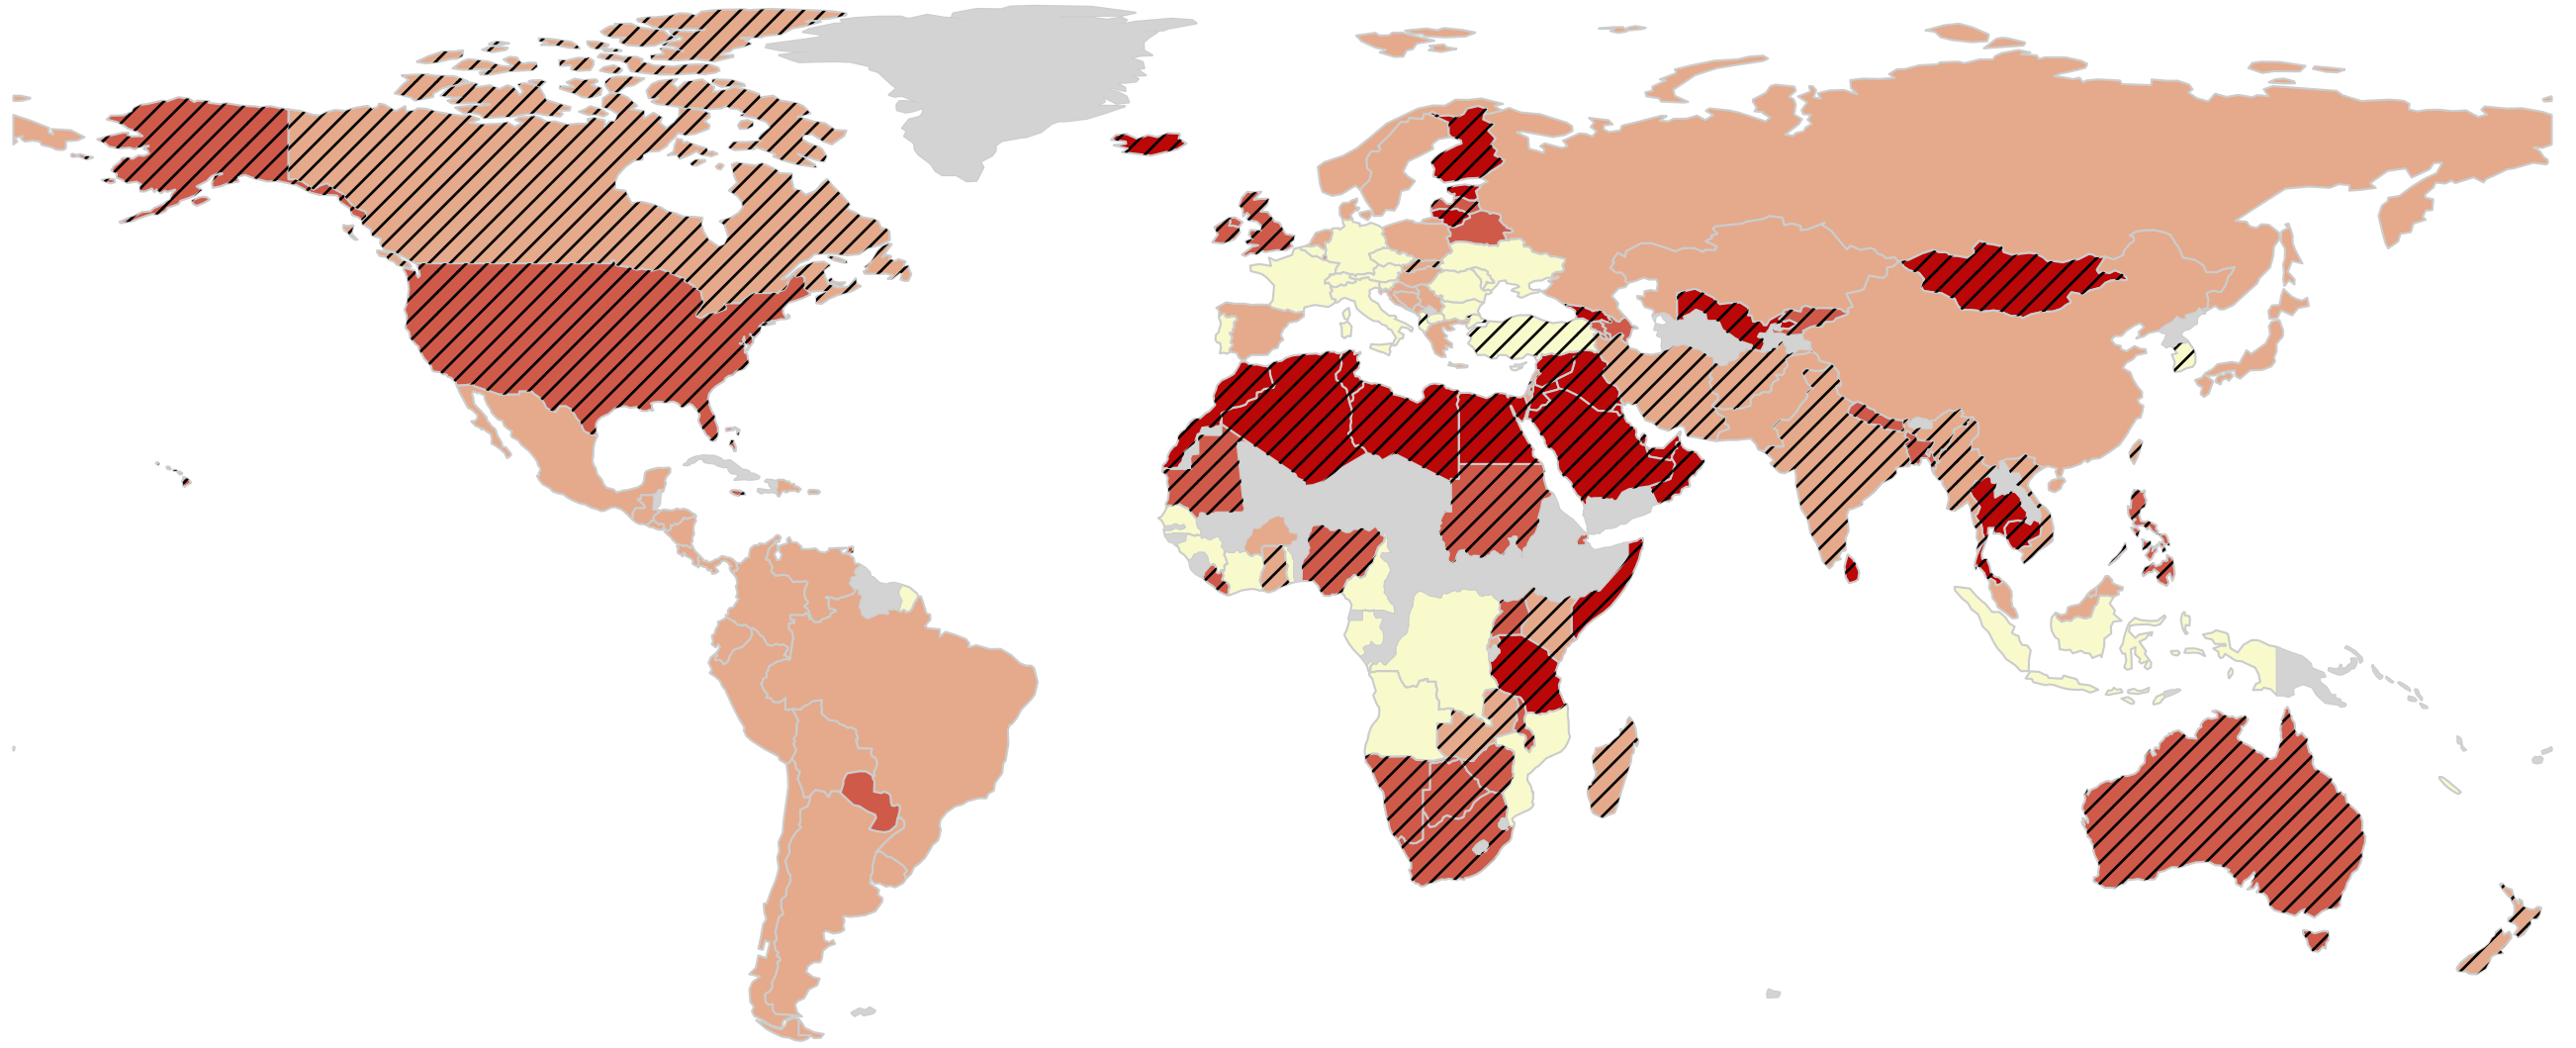

  $\leq 0.58$  (1st Q)     $\leq 0.82$  (2nd Q)     $\leq 1.30$  (3rd Q)     $\leq 1.90$  (4th Q)    No Data    High Refusal

Supplement: supplementary_material [file attachment]

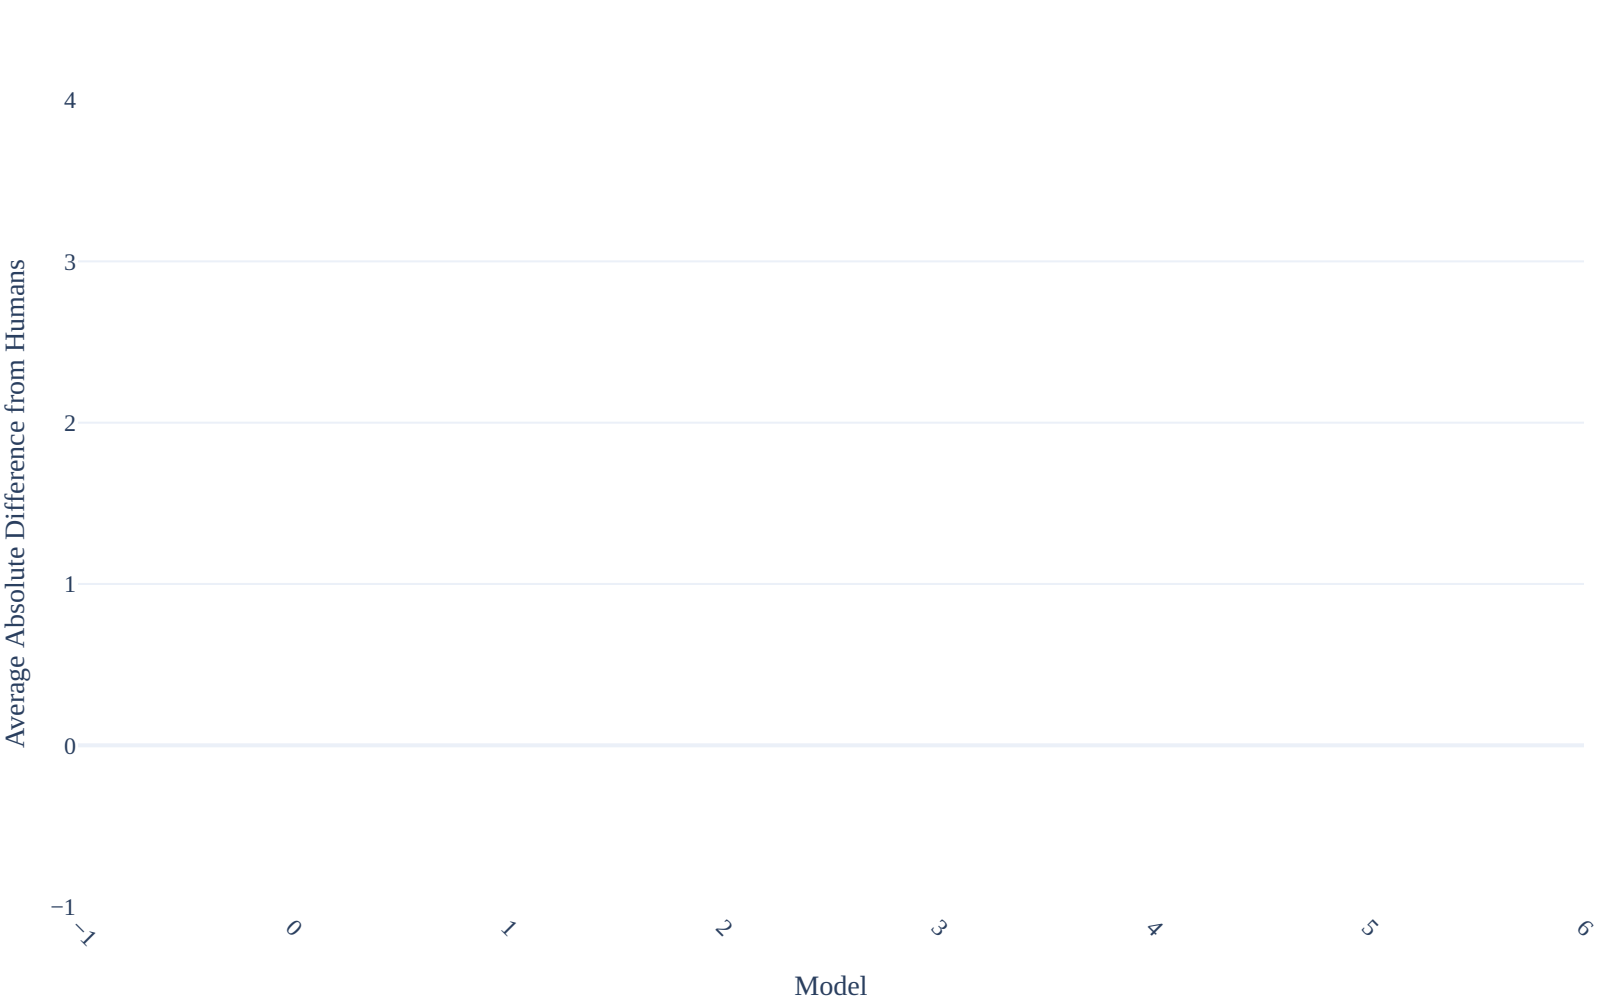

Supplement: supplementary_material [file attachment]

■ Gemma 2 27B ○ Human Preference

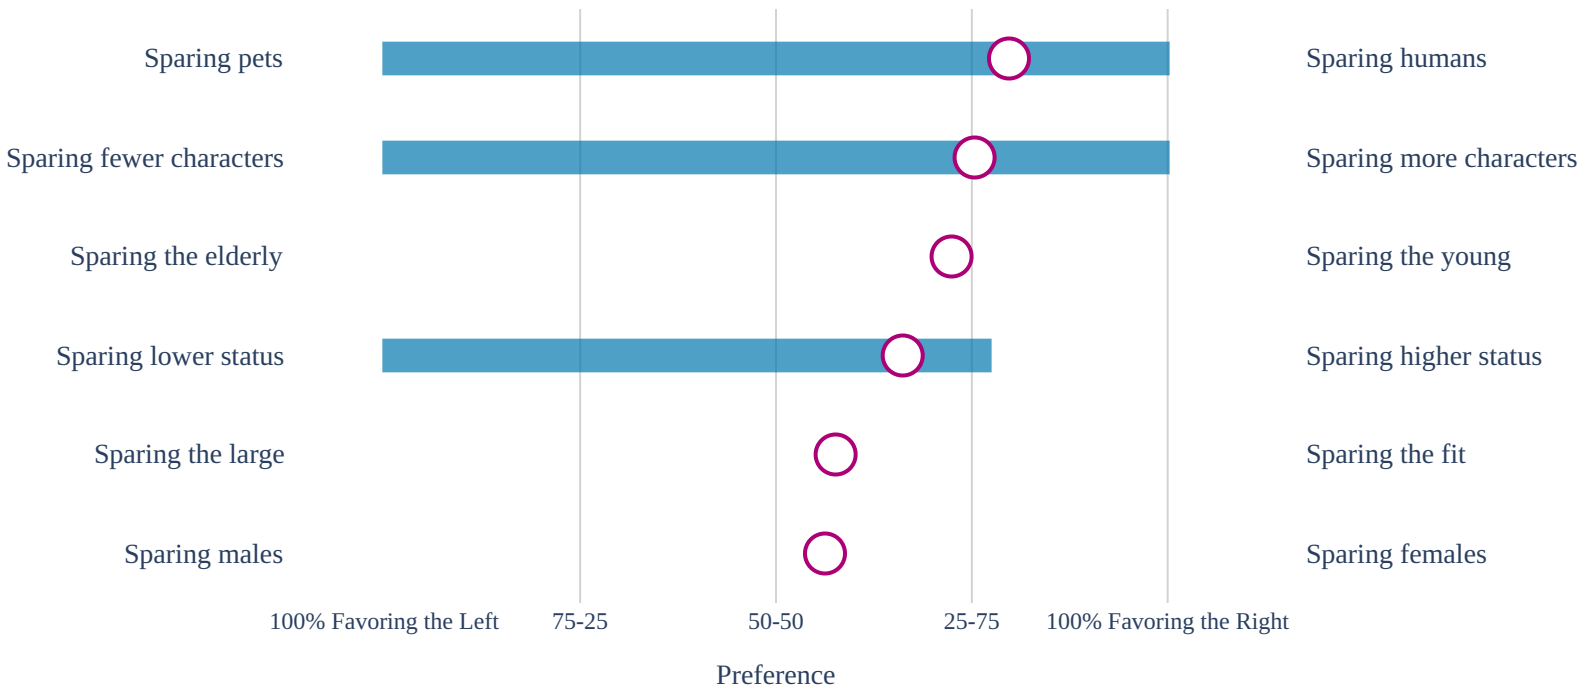

Supplement: supplementary_material [file attachment]

■ Gemma 2 2B ○ Human Preference

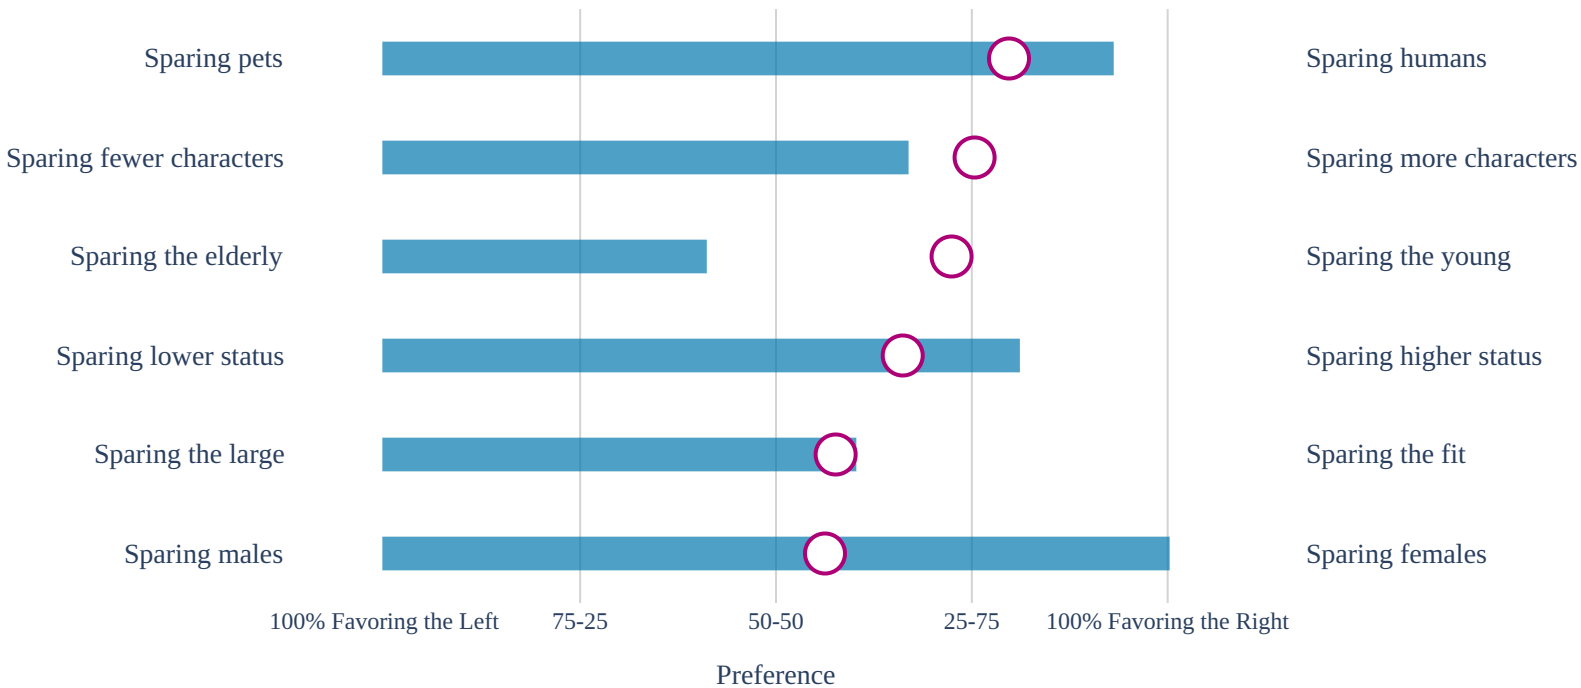

Supplement: supplementary_material [file attachment]

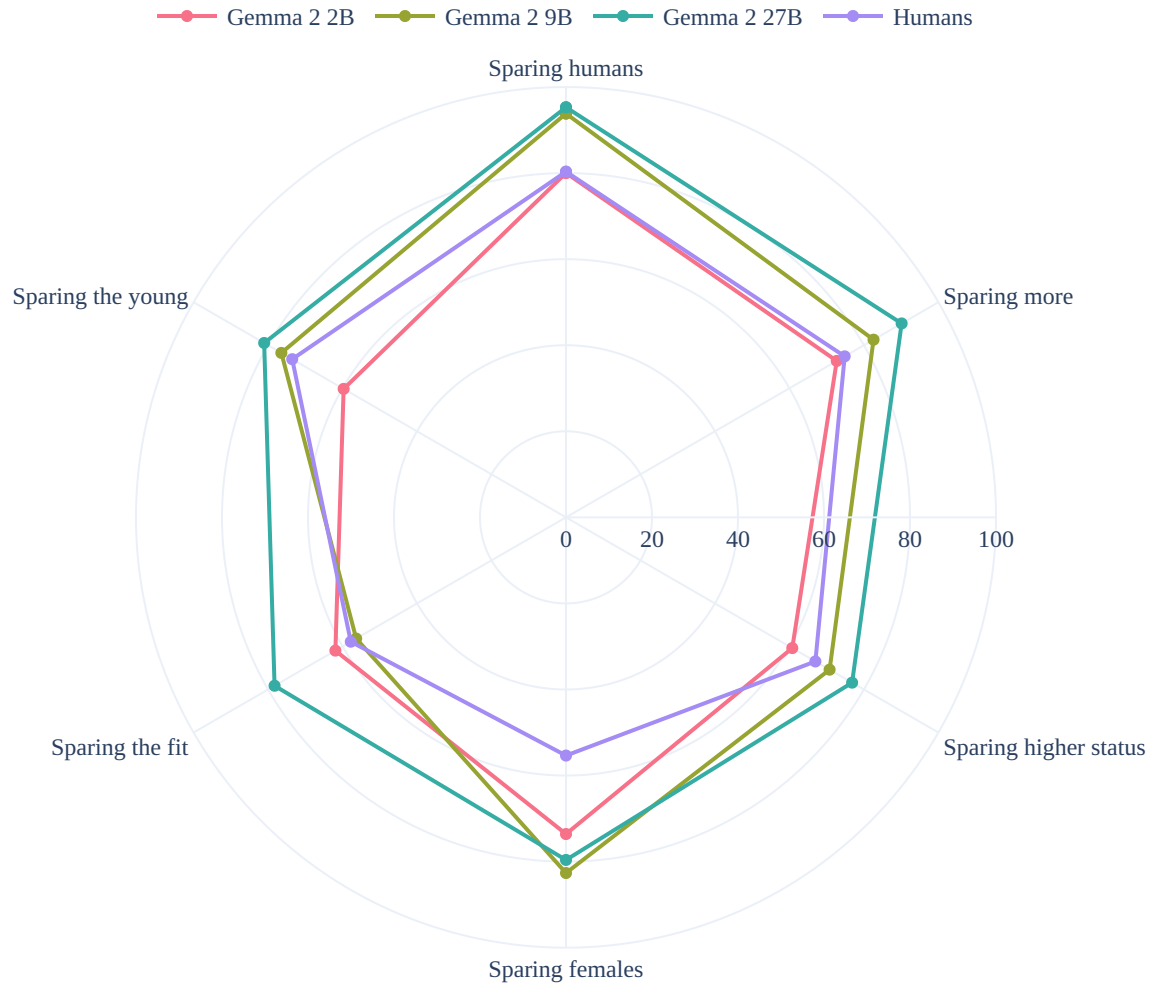

Supplement: supplementary_material [file attachment]

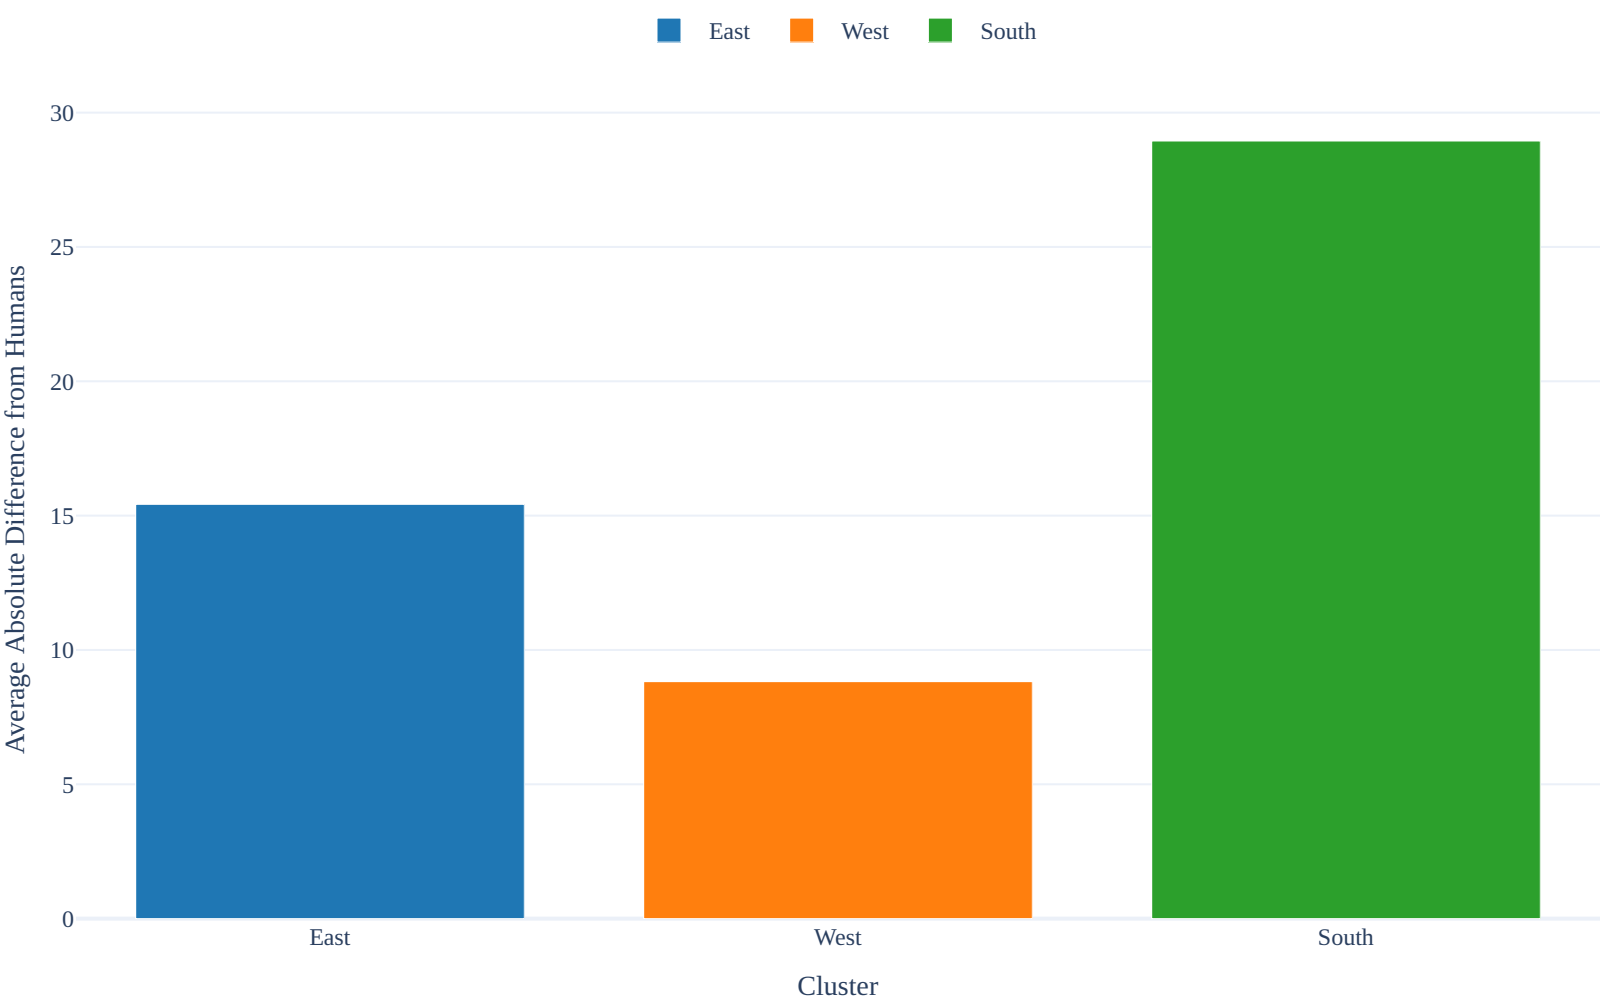

Supplement: supplementary_material [file attachment]

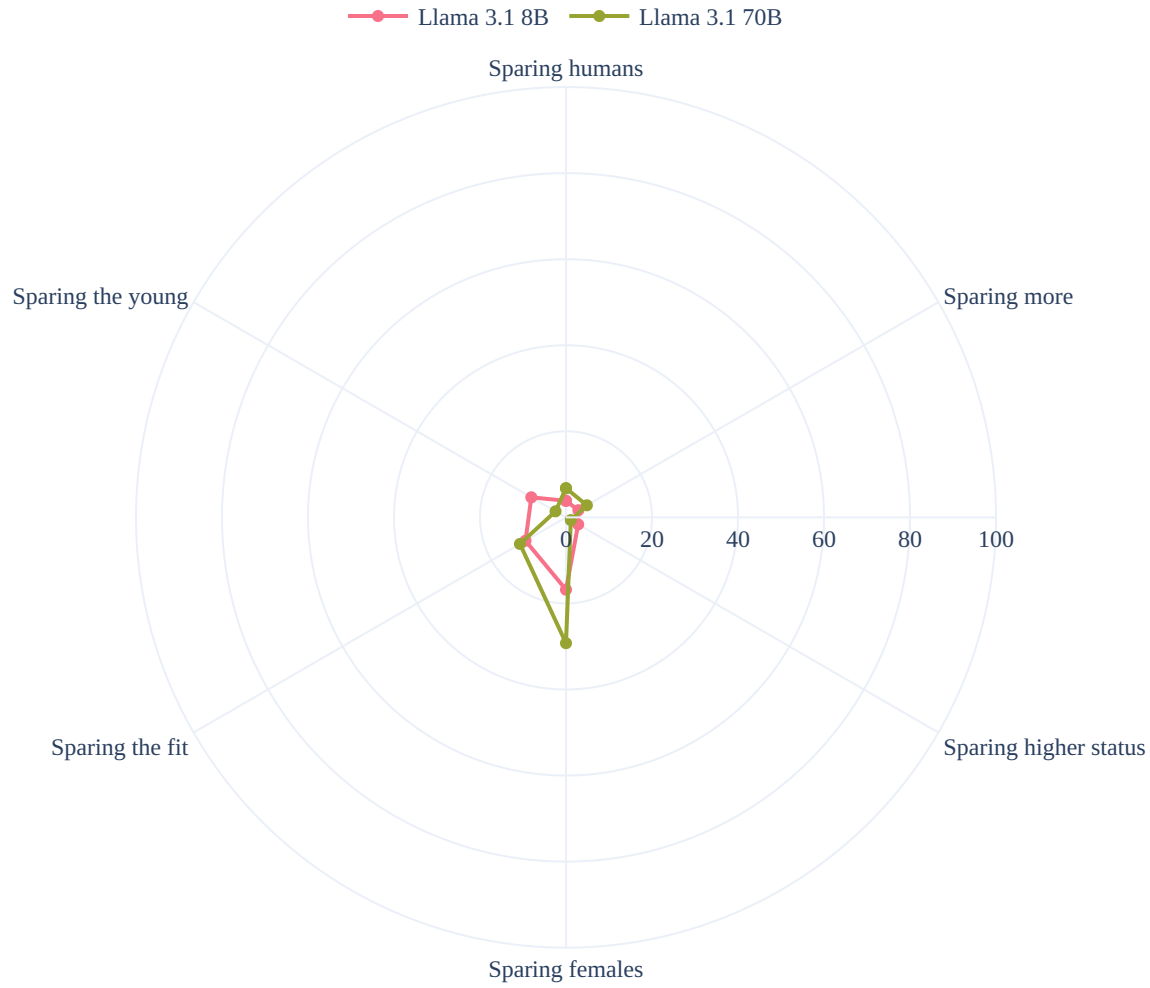

Supplement: supplementary_material [file attachment]

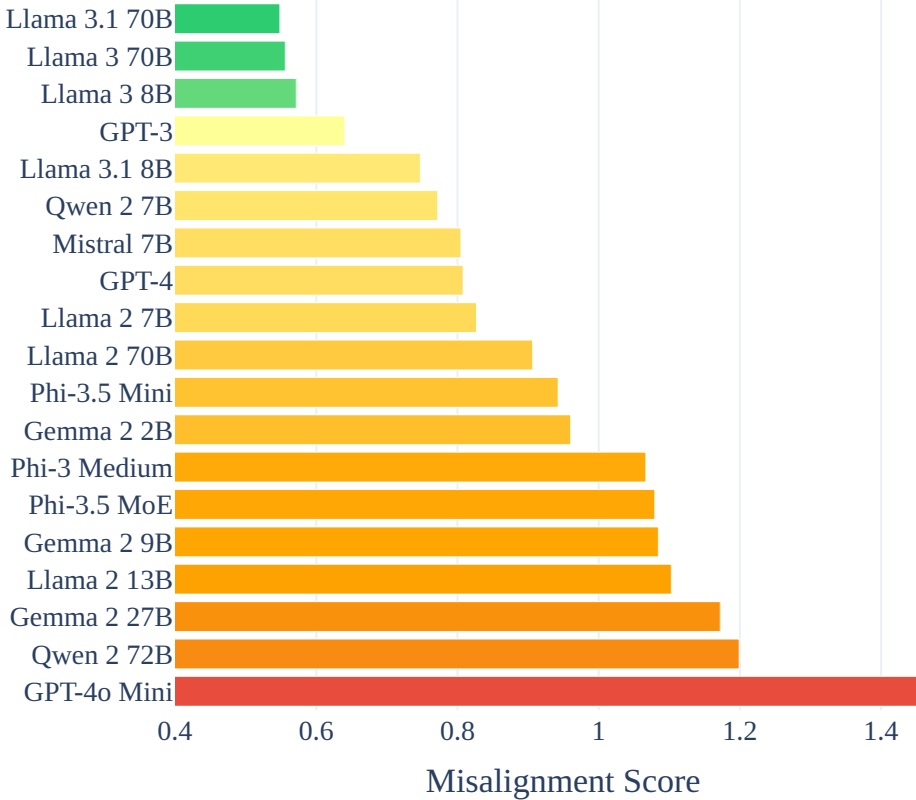

Supplement: supplementary_material [file attachment]

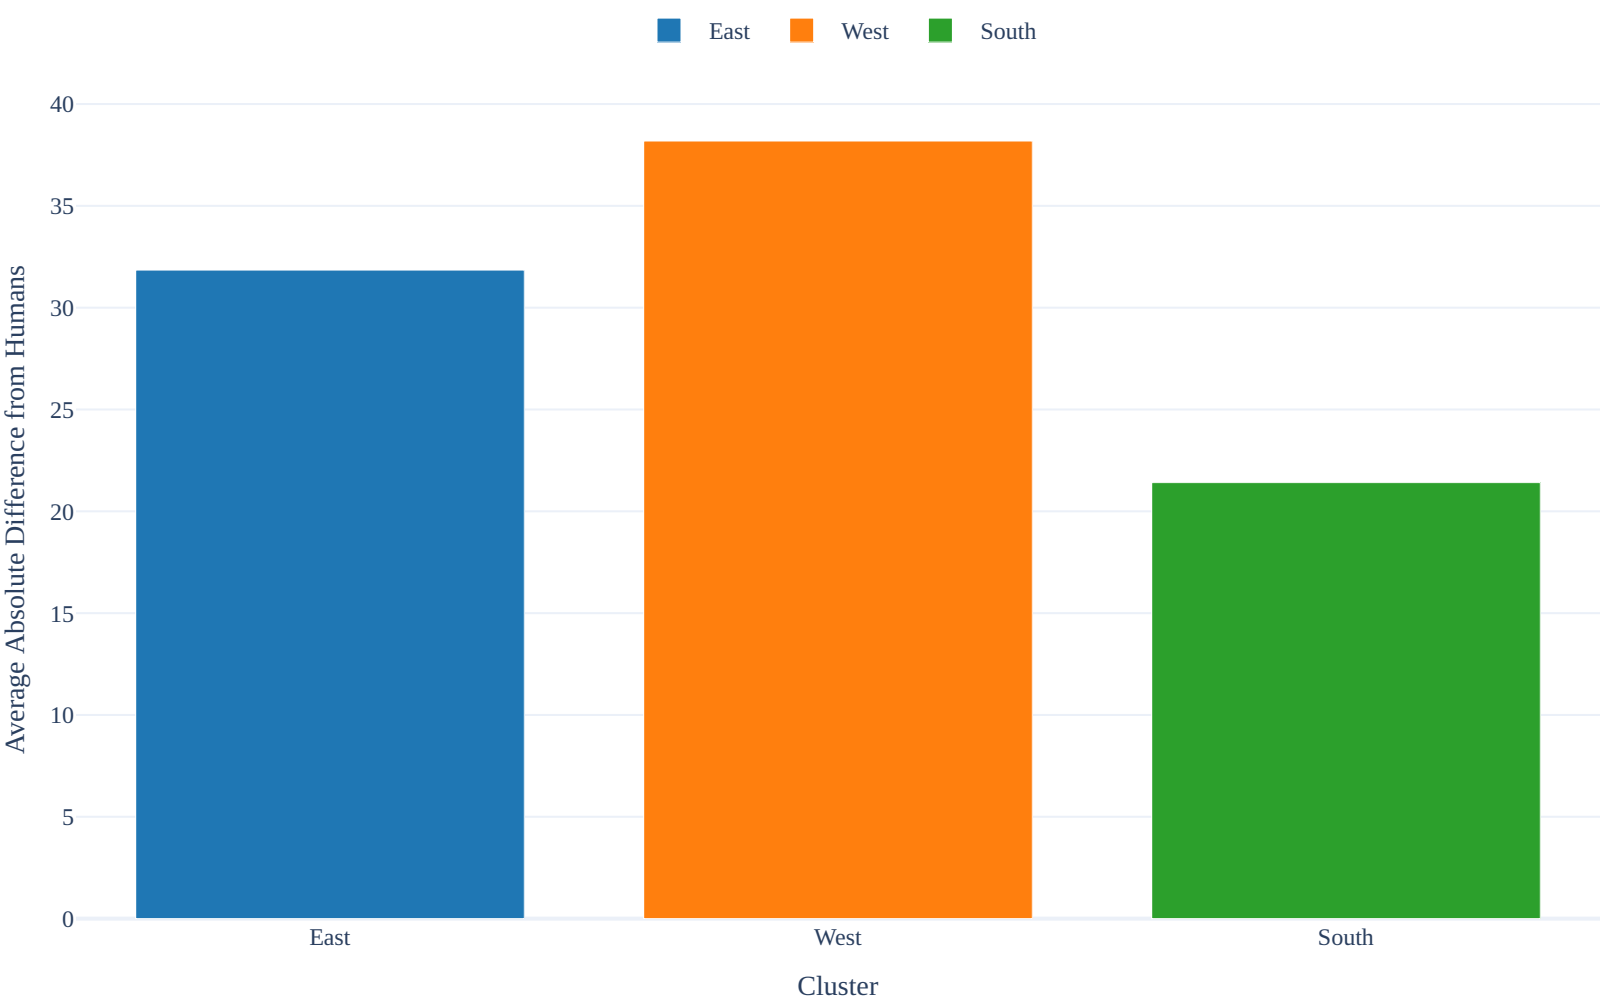

Supplement: supplementary_material [file attachment]

GPT-4o Mini

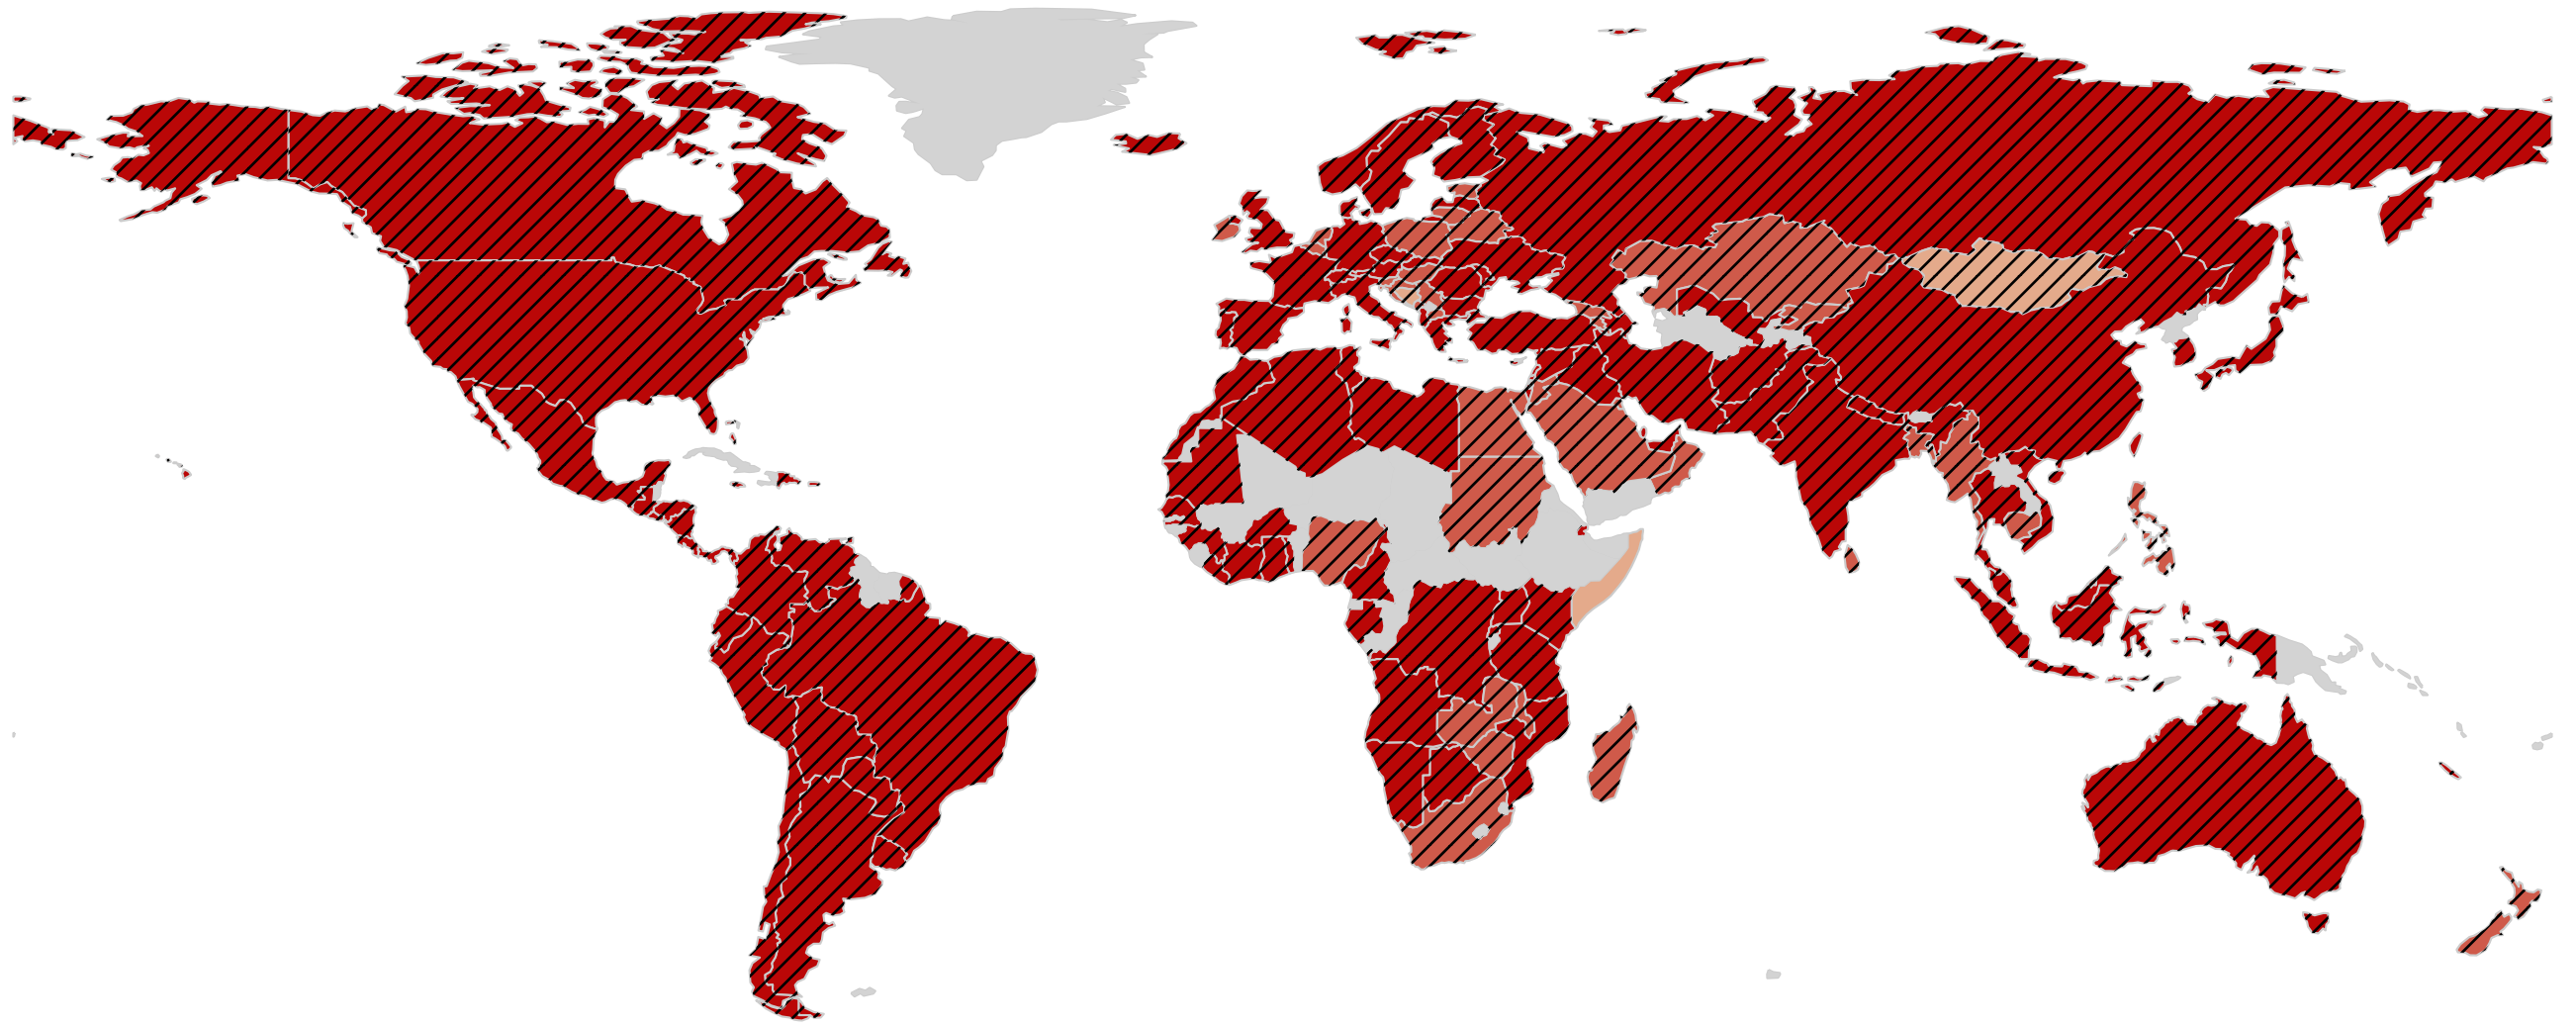

<=0.58 (1st Q) <=0.82 (2nd Q) <=1.30 (3rd Q) <=1.90 (4th Q) No Data High Refusal

Supplement: supplementary_material [file attachment]

Cluster A Cluster B Cluster C Cluster D Human Preference

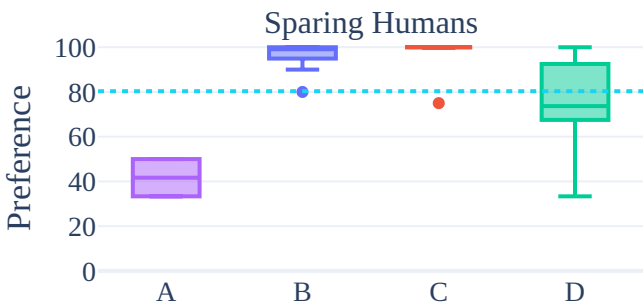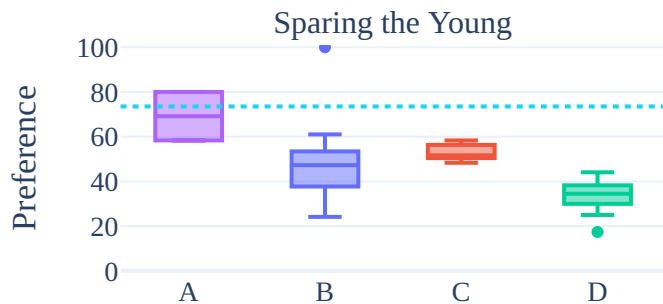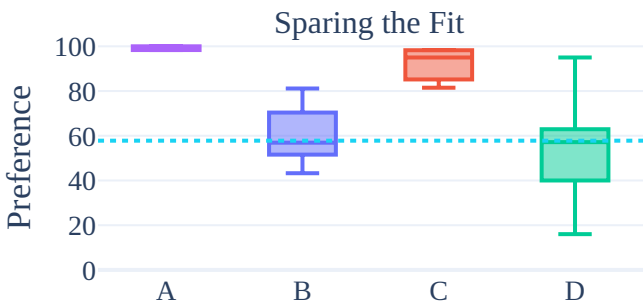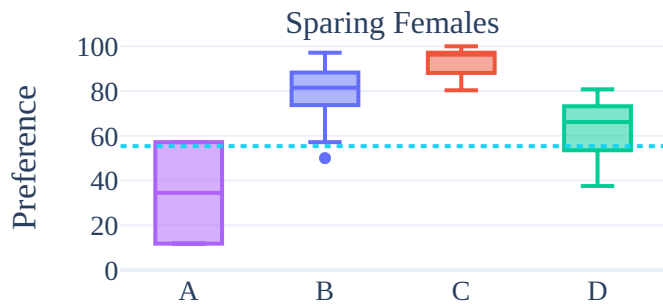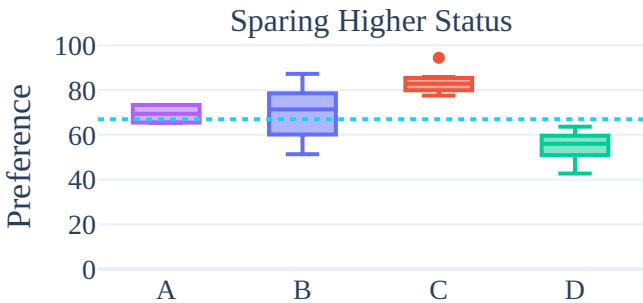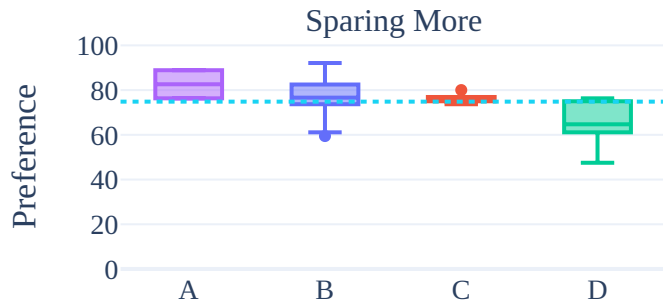

Supplement: supplementary_material [file attachment]

Gemma 2 27B

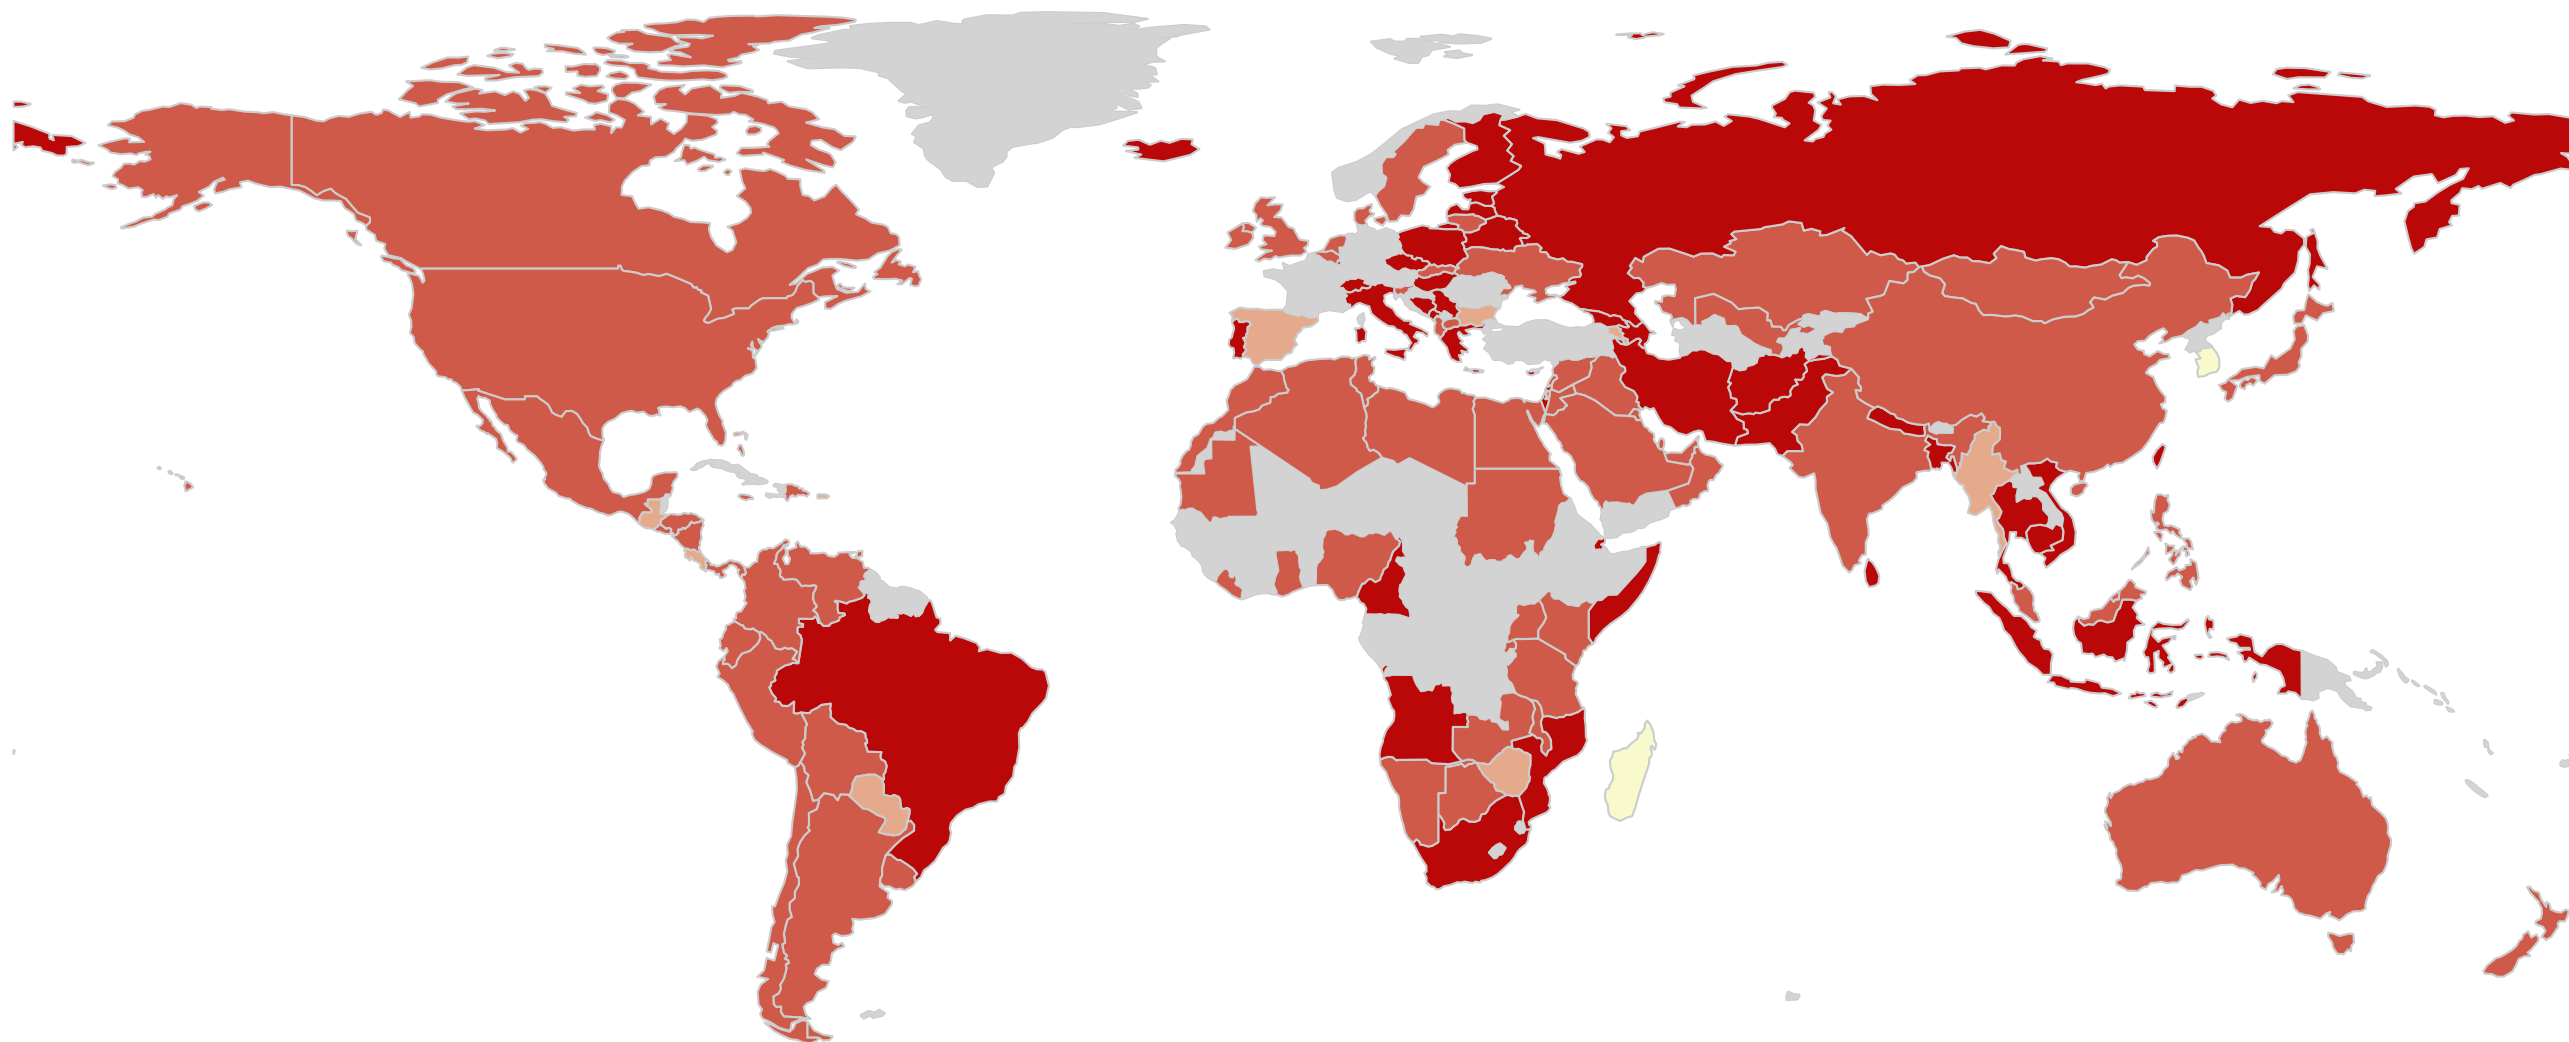

$\leq 0.58$  (1st Q)     $\leq 0.82$  (2nd Q)     $\leq 1.30$  (3rd Q)     $\leq 1.90$  (4th Q)    No Data

Supplement: supplementary_material [file attachment]

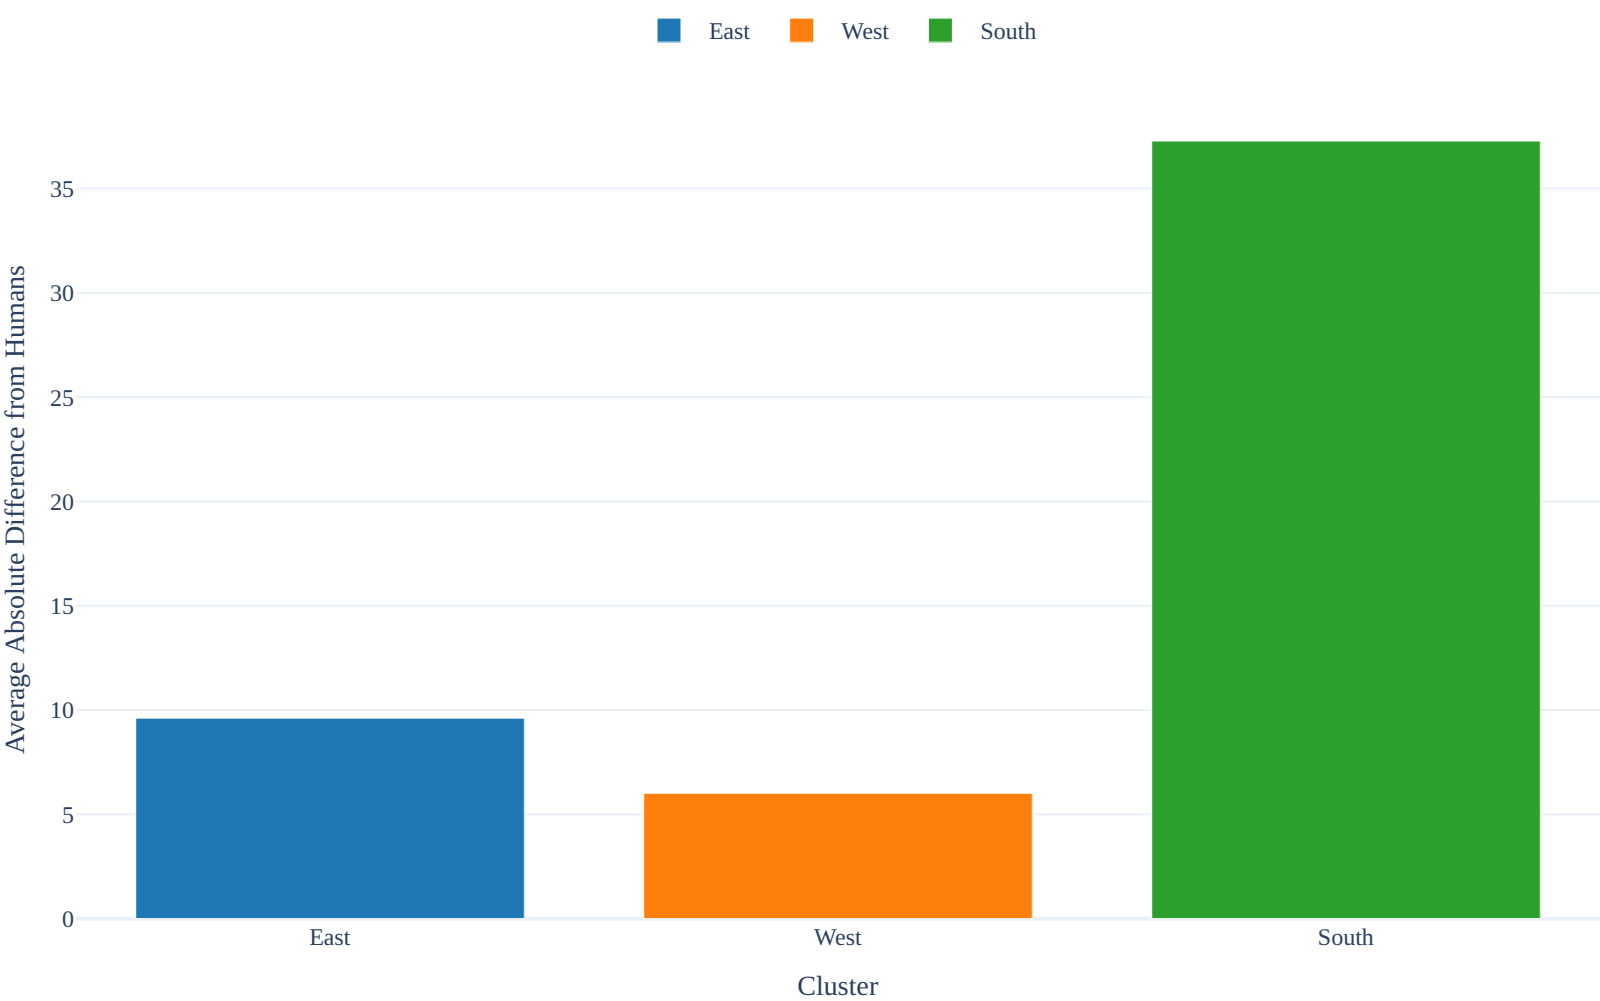

Supplement: supplementary_material [file attachment]

—●— Llama 2 7B
 —●— Llama 2 13B
 —●— Llama 2 70B
 —●— Humans

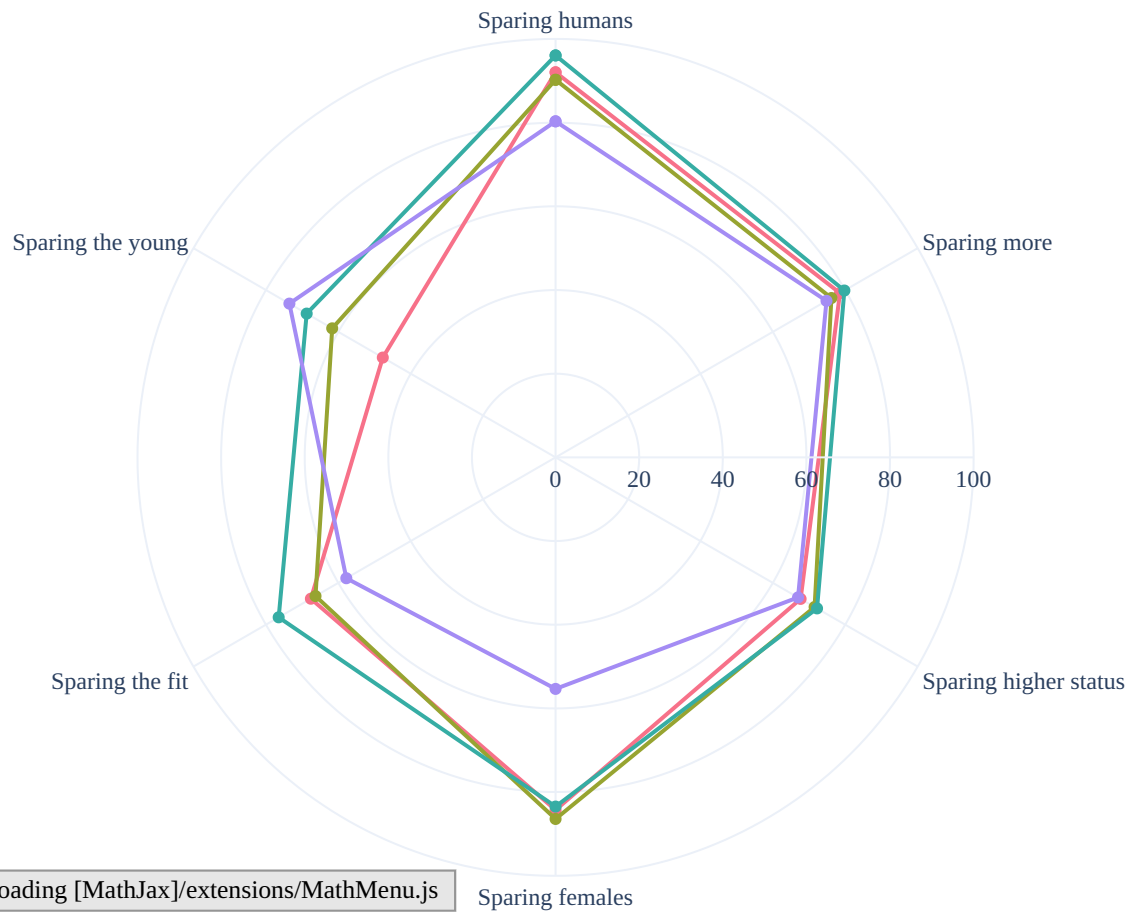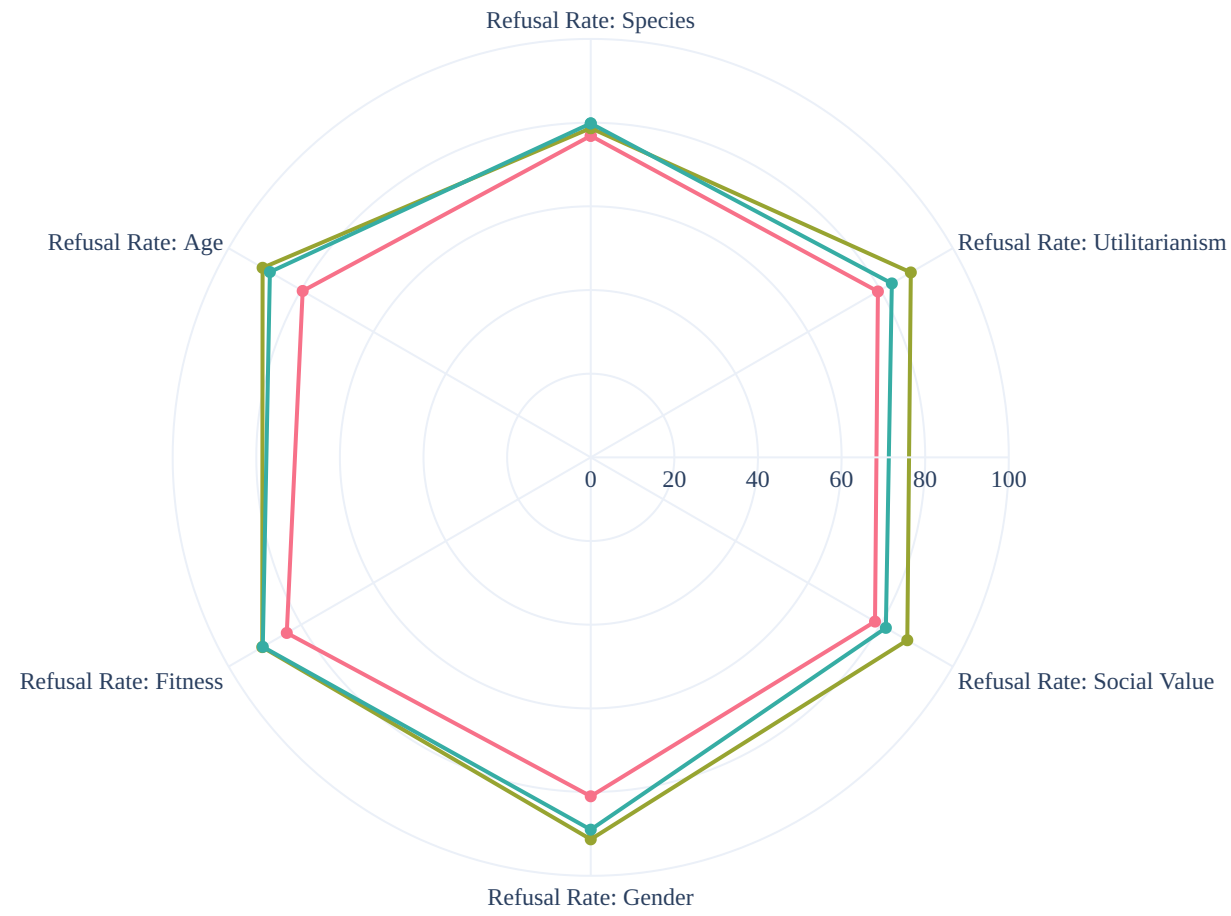

Supplement: supplementary_material [file attachment]

Phi-3 Medium Humans

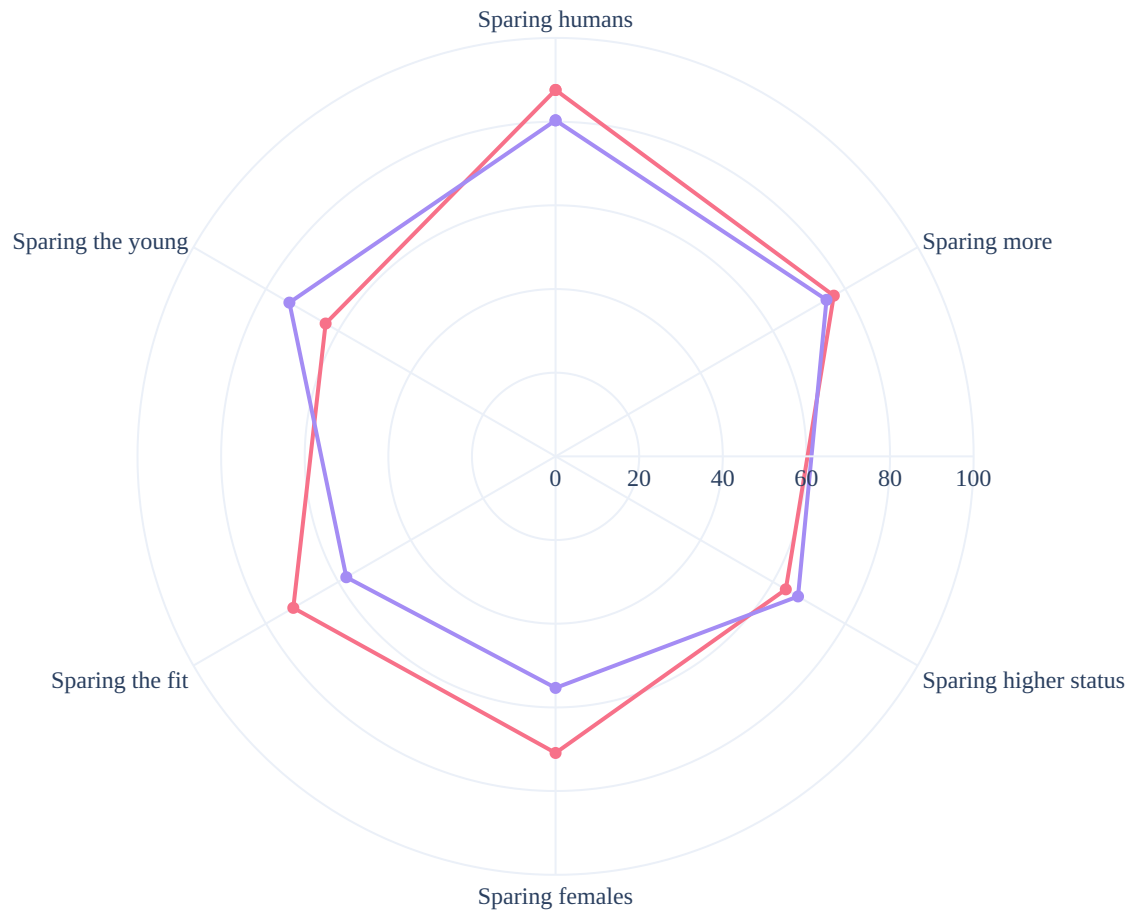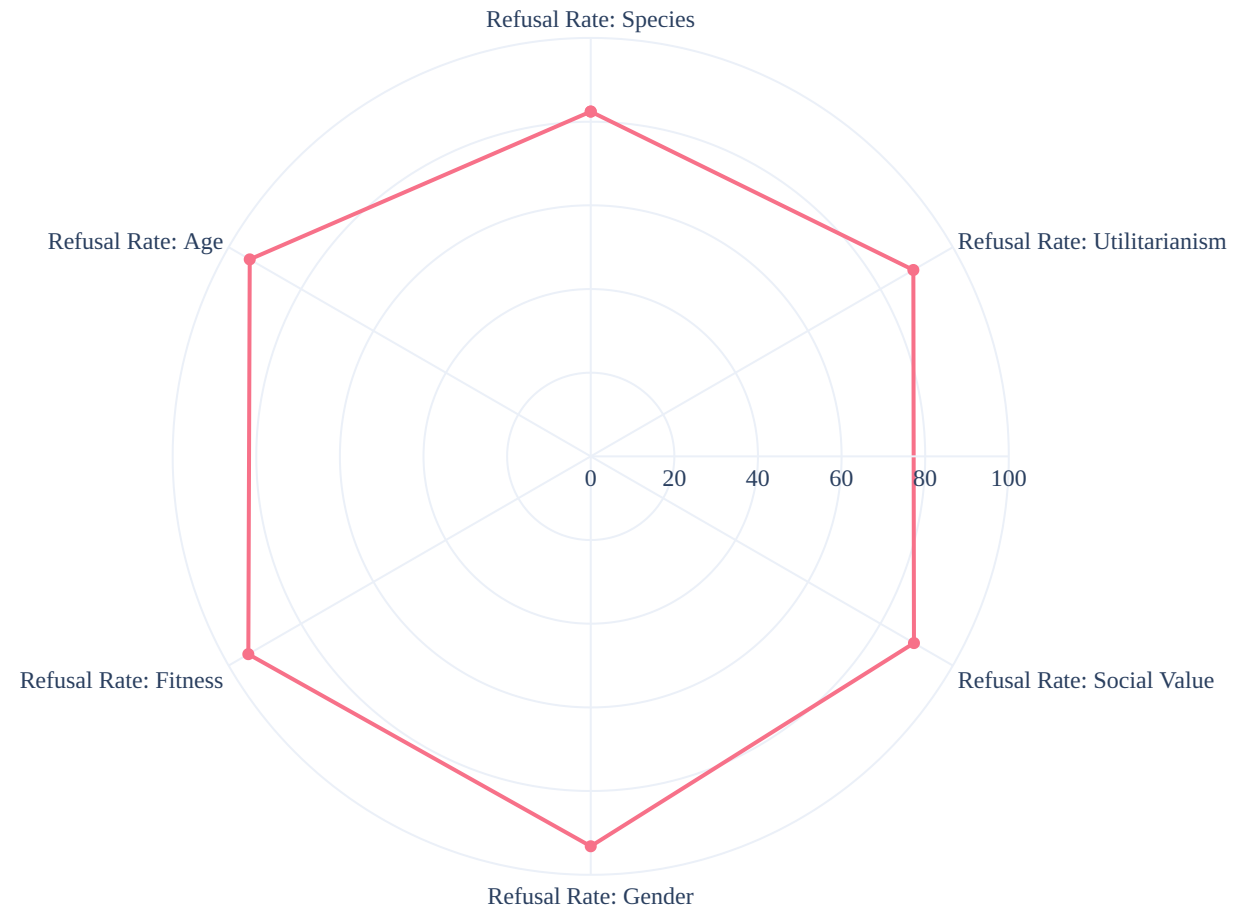

Supplement: supplementary_material [file attachment]

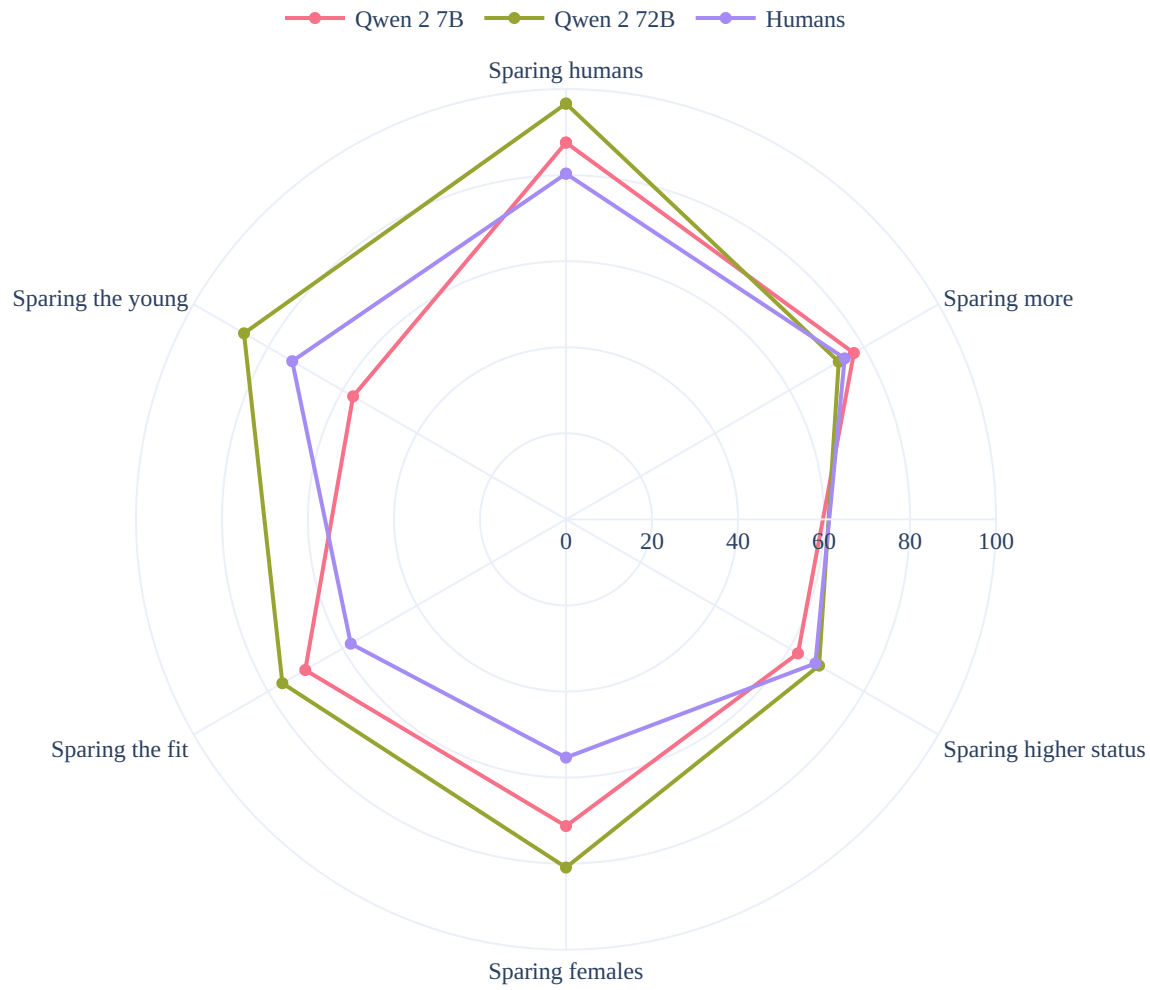

Supplement: supplementary_material [file attachment]

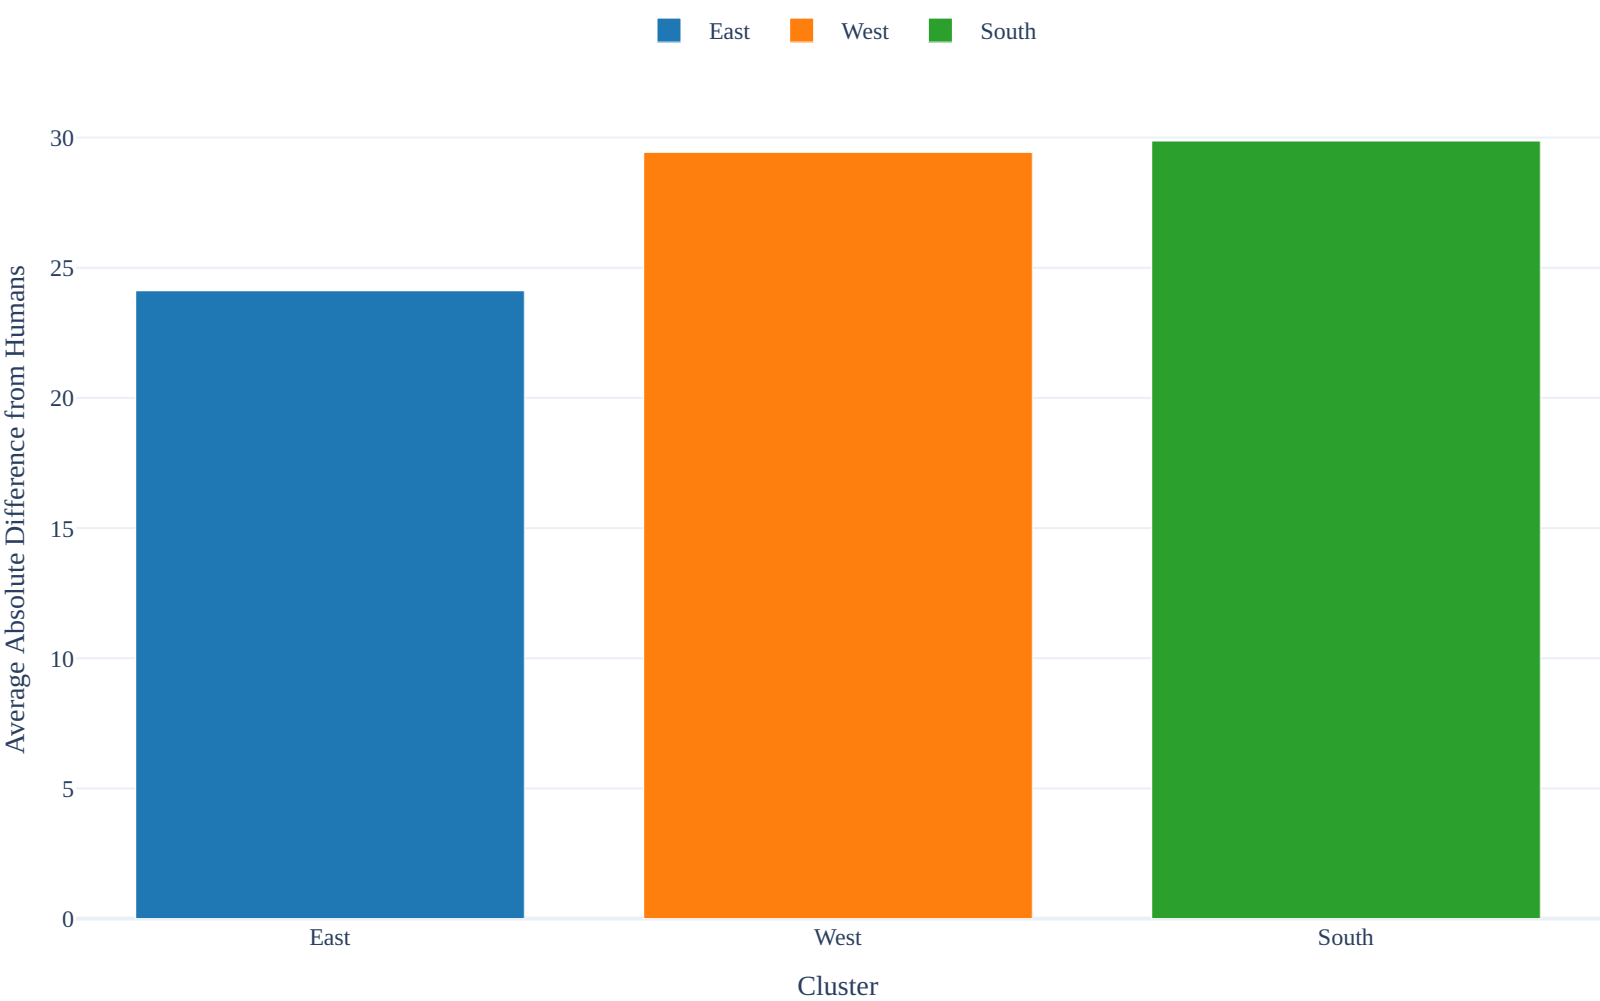

Supplement: supplementary_material [file attachment]

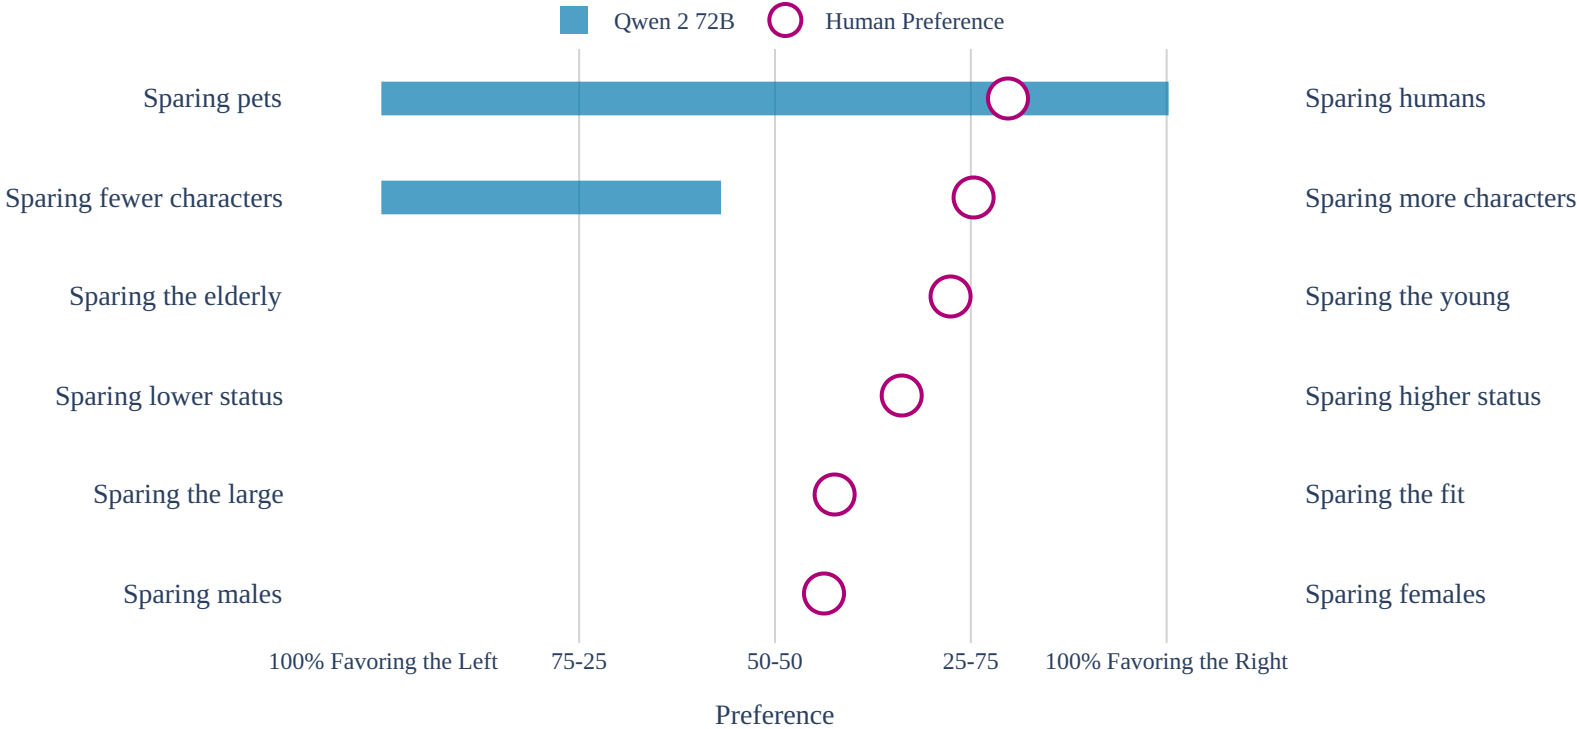

Supplement: supplementary_material [file attachment]

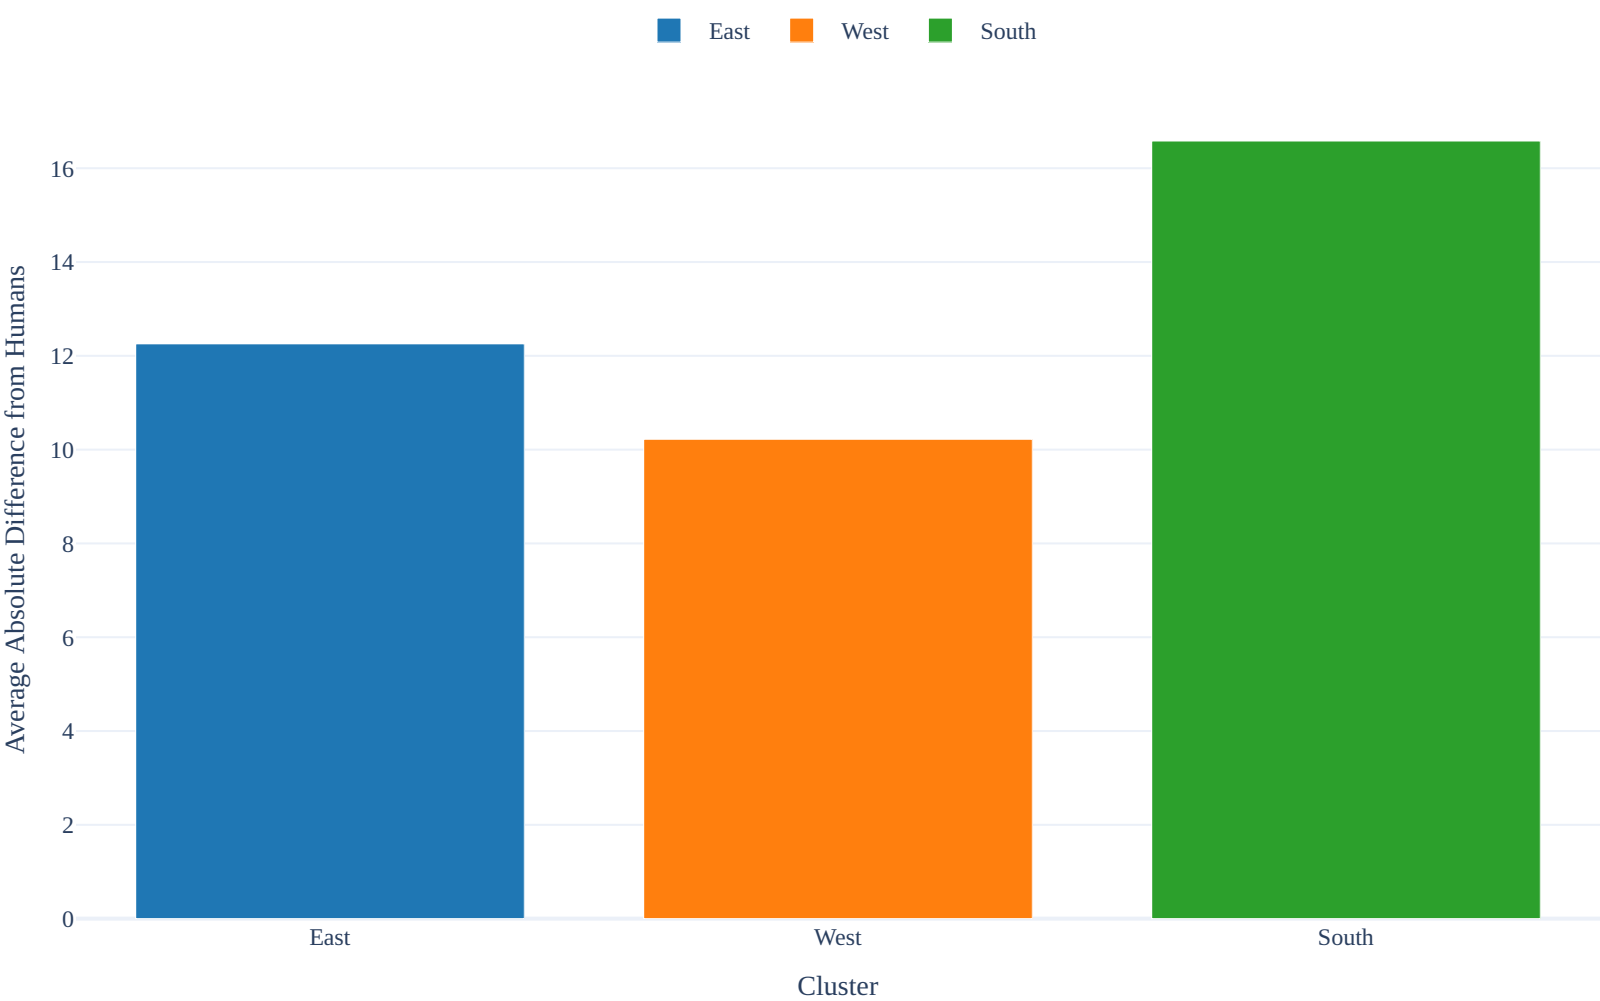

Supplement: supplementary_material [file attachment]

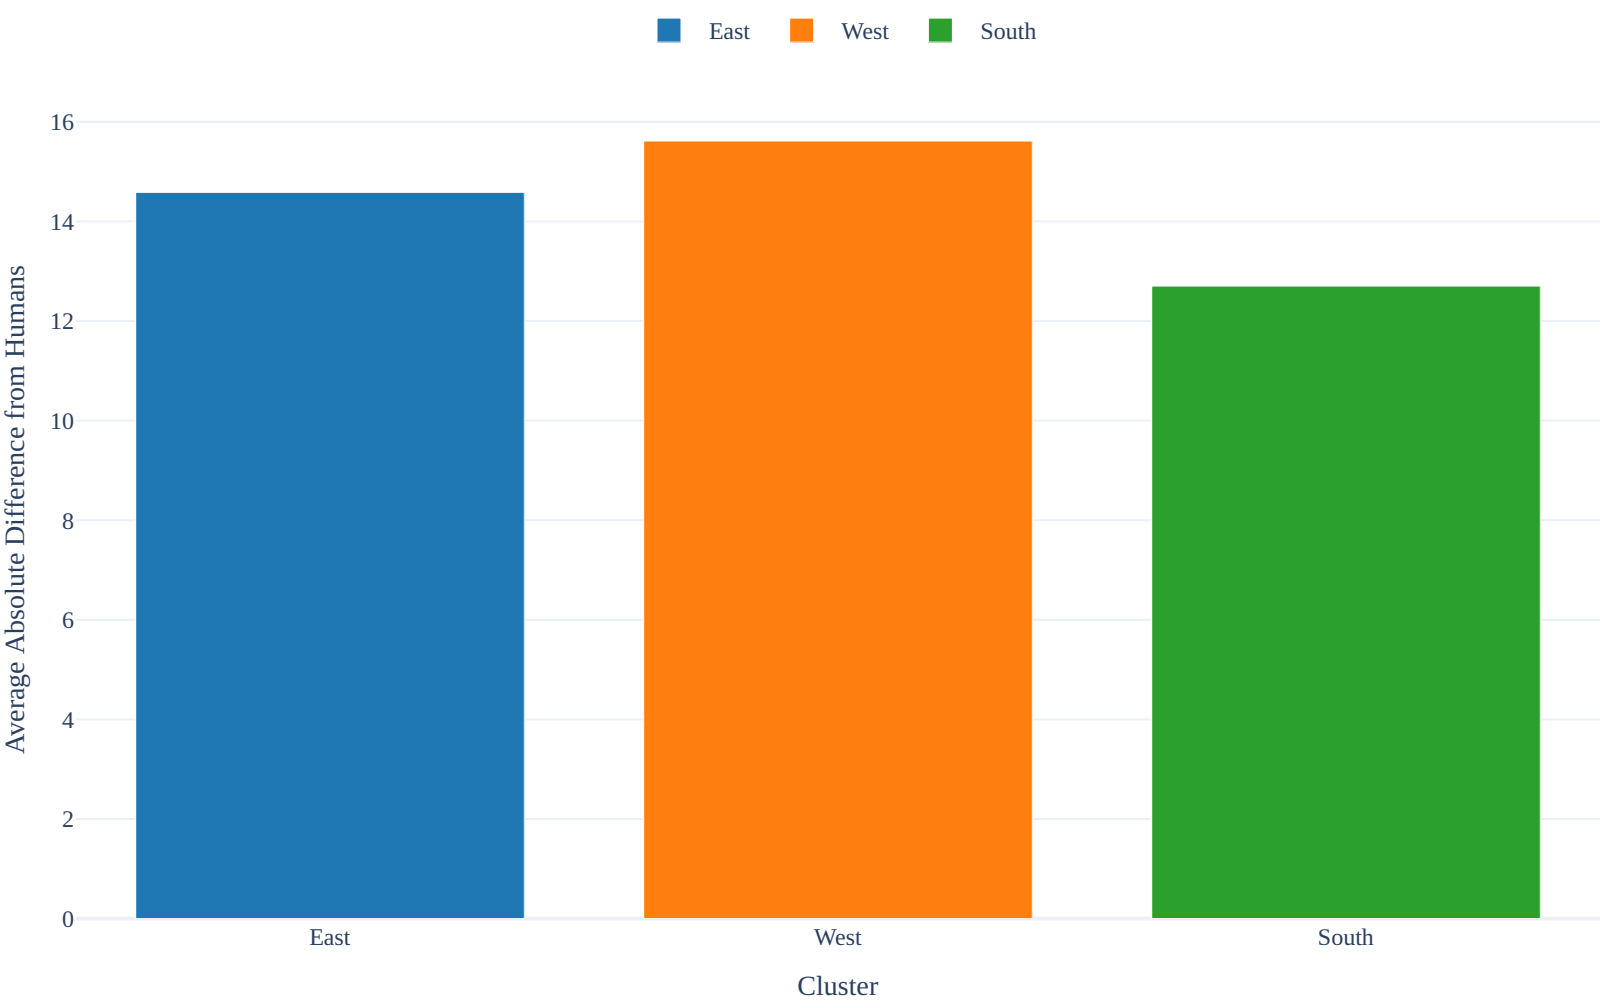

Supplement: supplementary_material [file attachment]

Llama 2 70B

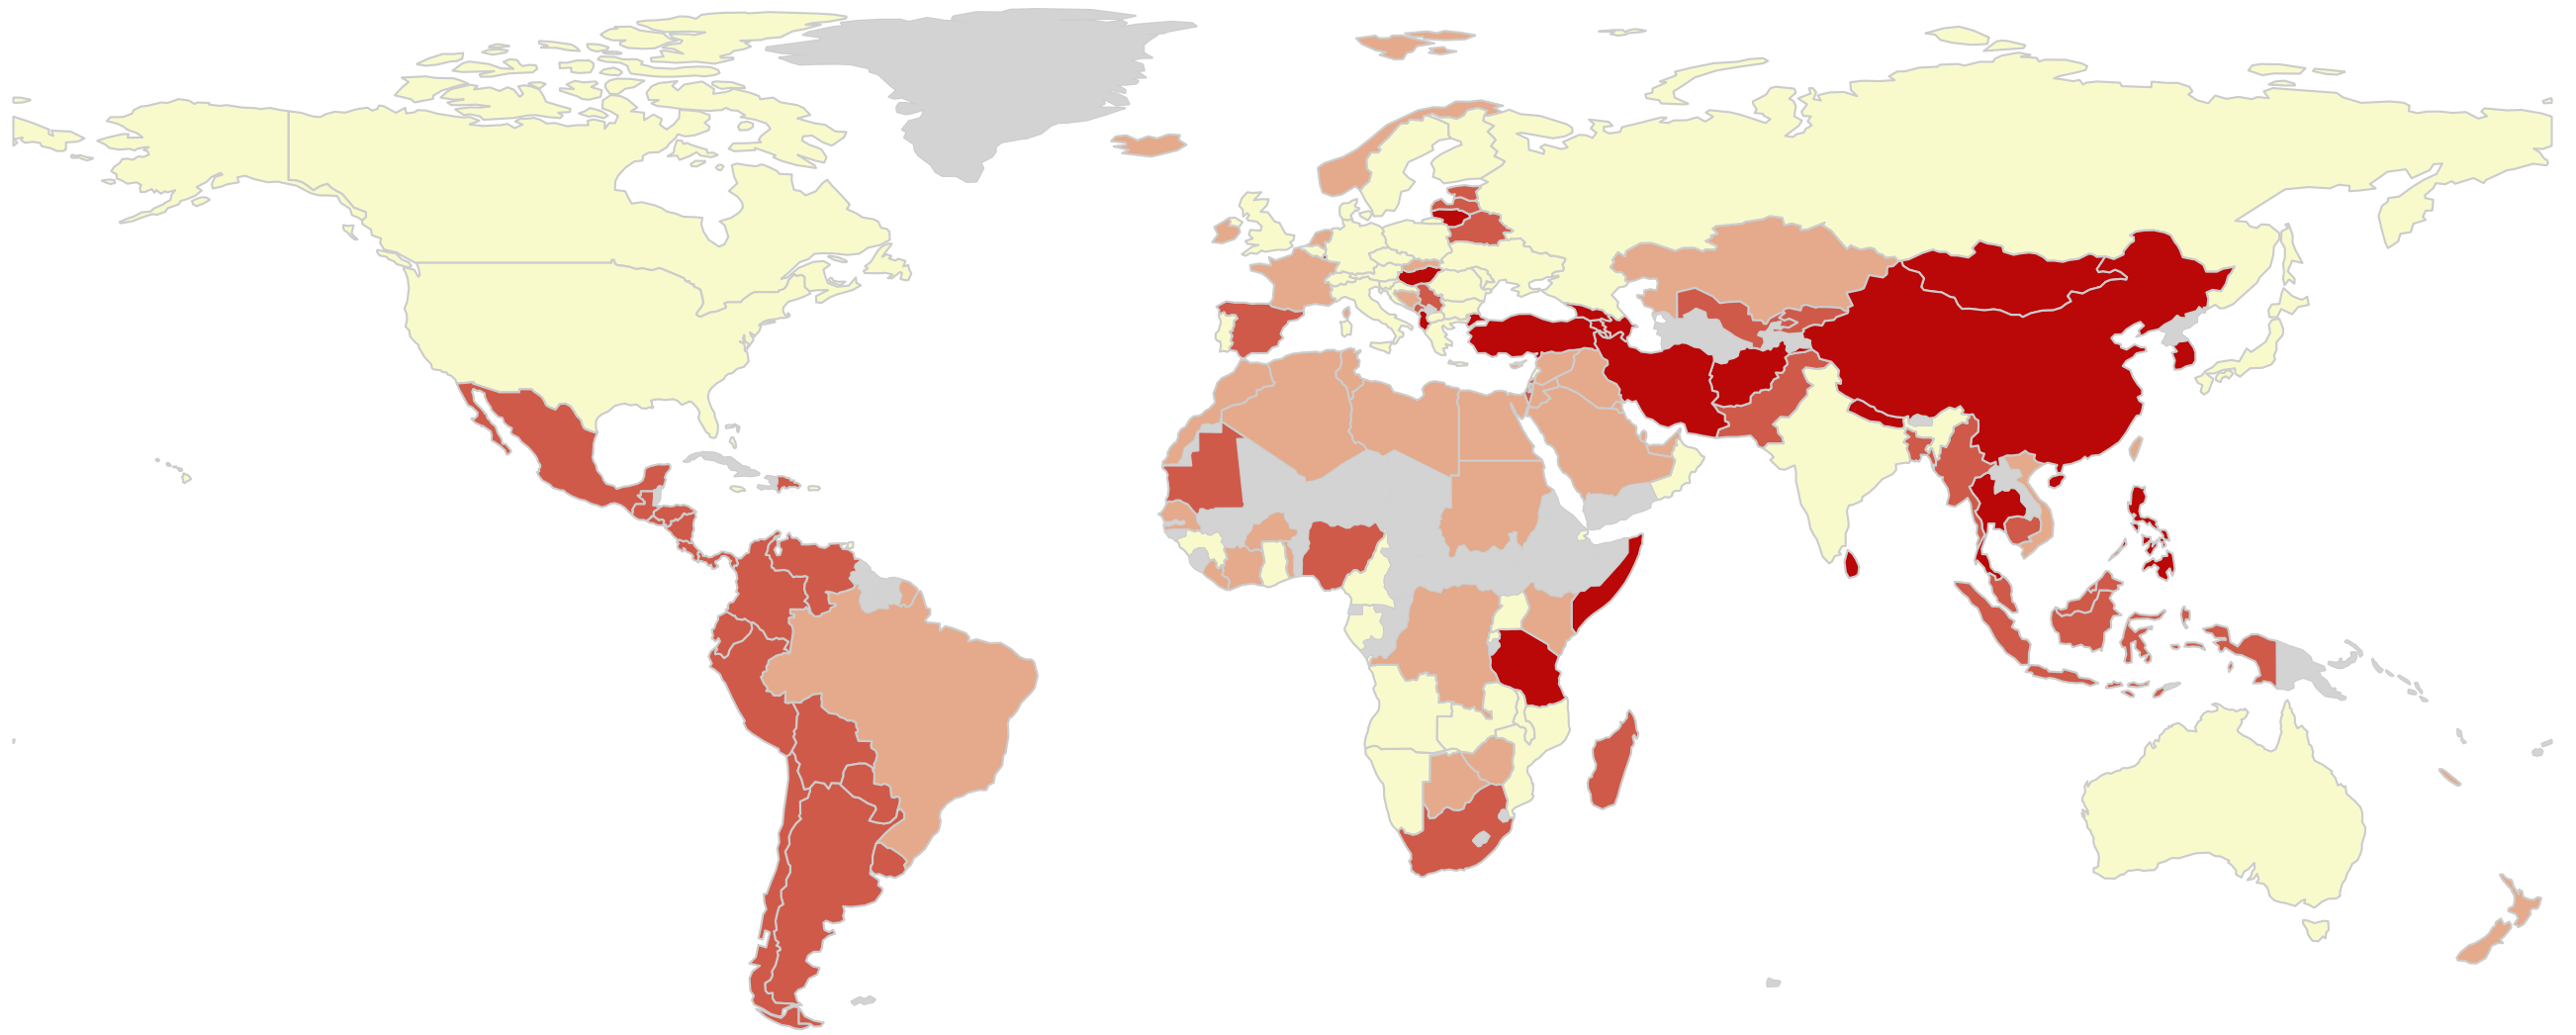

$\leq 0.58$  (1st Q)      $\leq 0.82$  (2nd Q)      $\leq 1.30$  (3rd Q)      $\leq 1.90$  (4th Q)     No Data

Supplement: supplementary_material [file attachment]

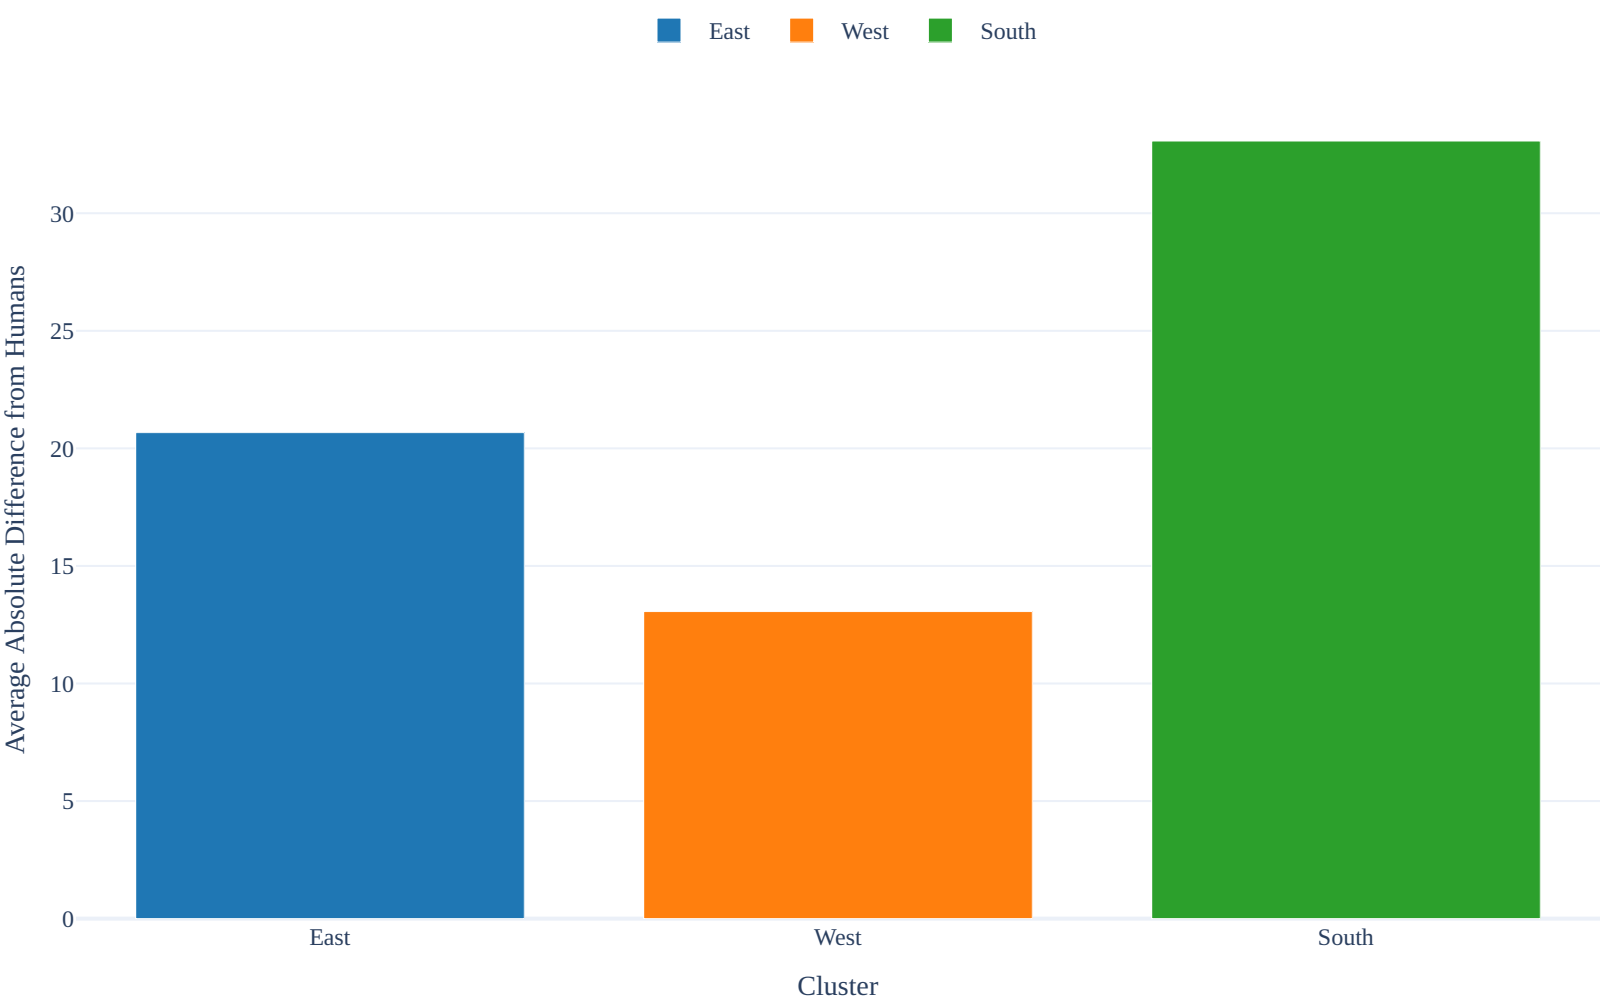

Supplement: supplementary_material [file attachment]

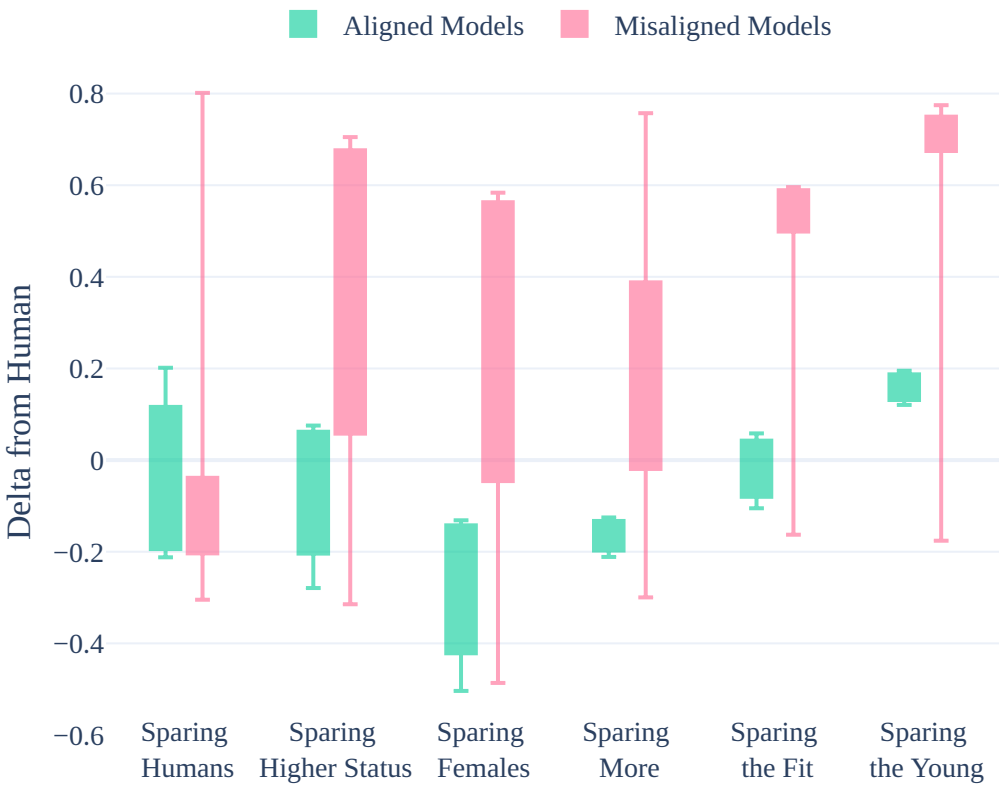

Supplement: supplementary_material [file attachment]

■ Mistral 7B ○ Human Preference

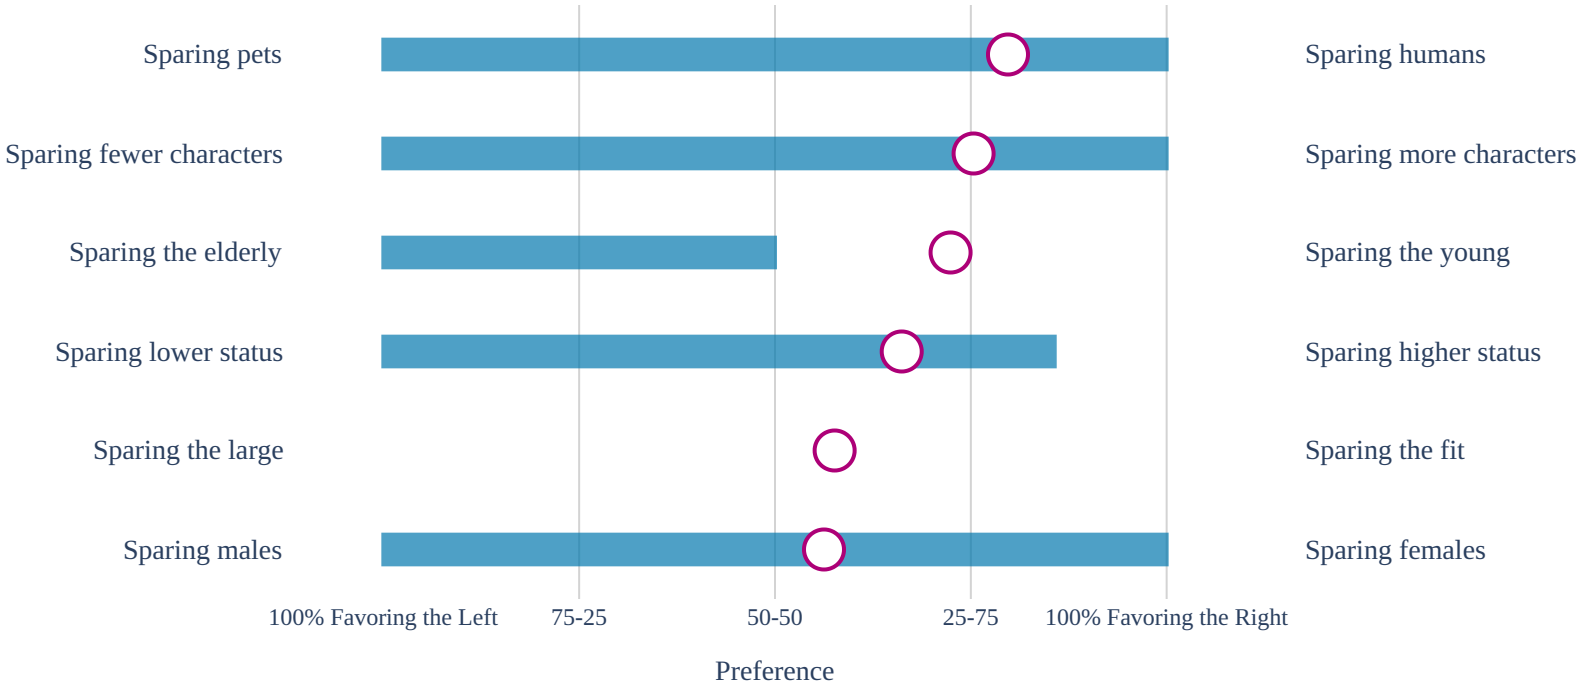

Supplement: supplementary_material [file attachment]

# Qwen 2 7B

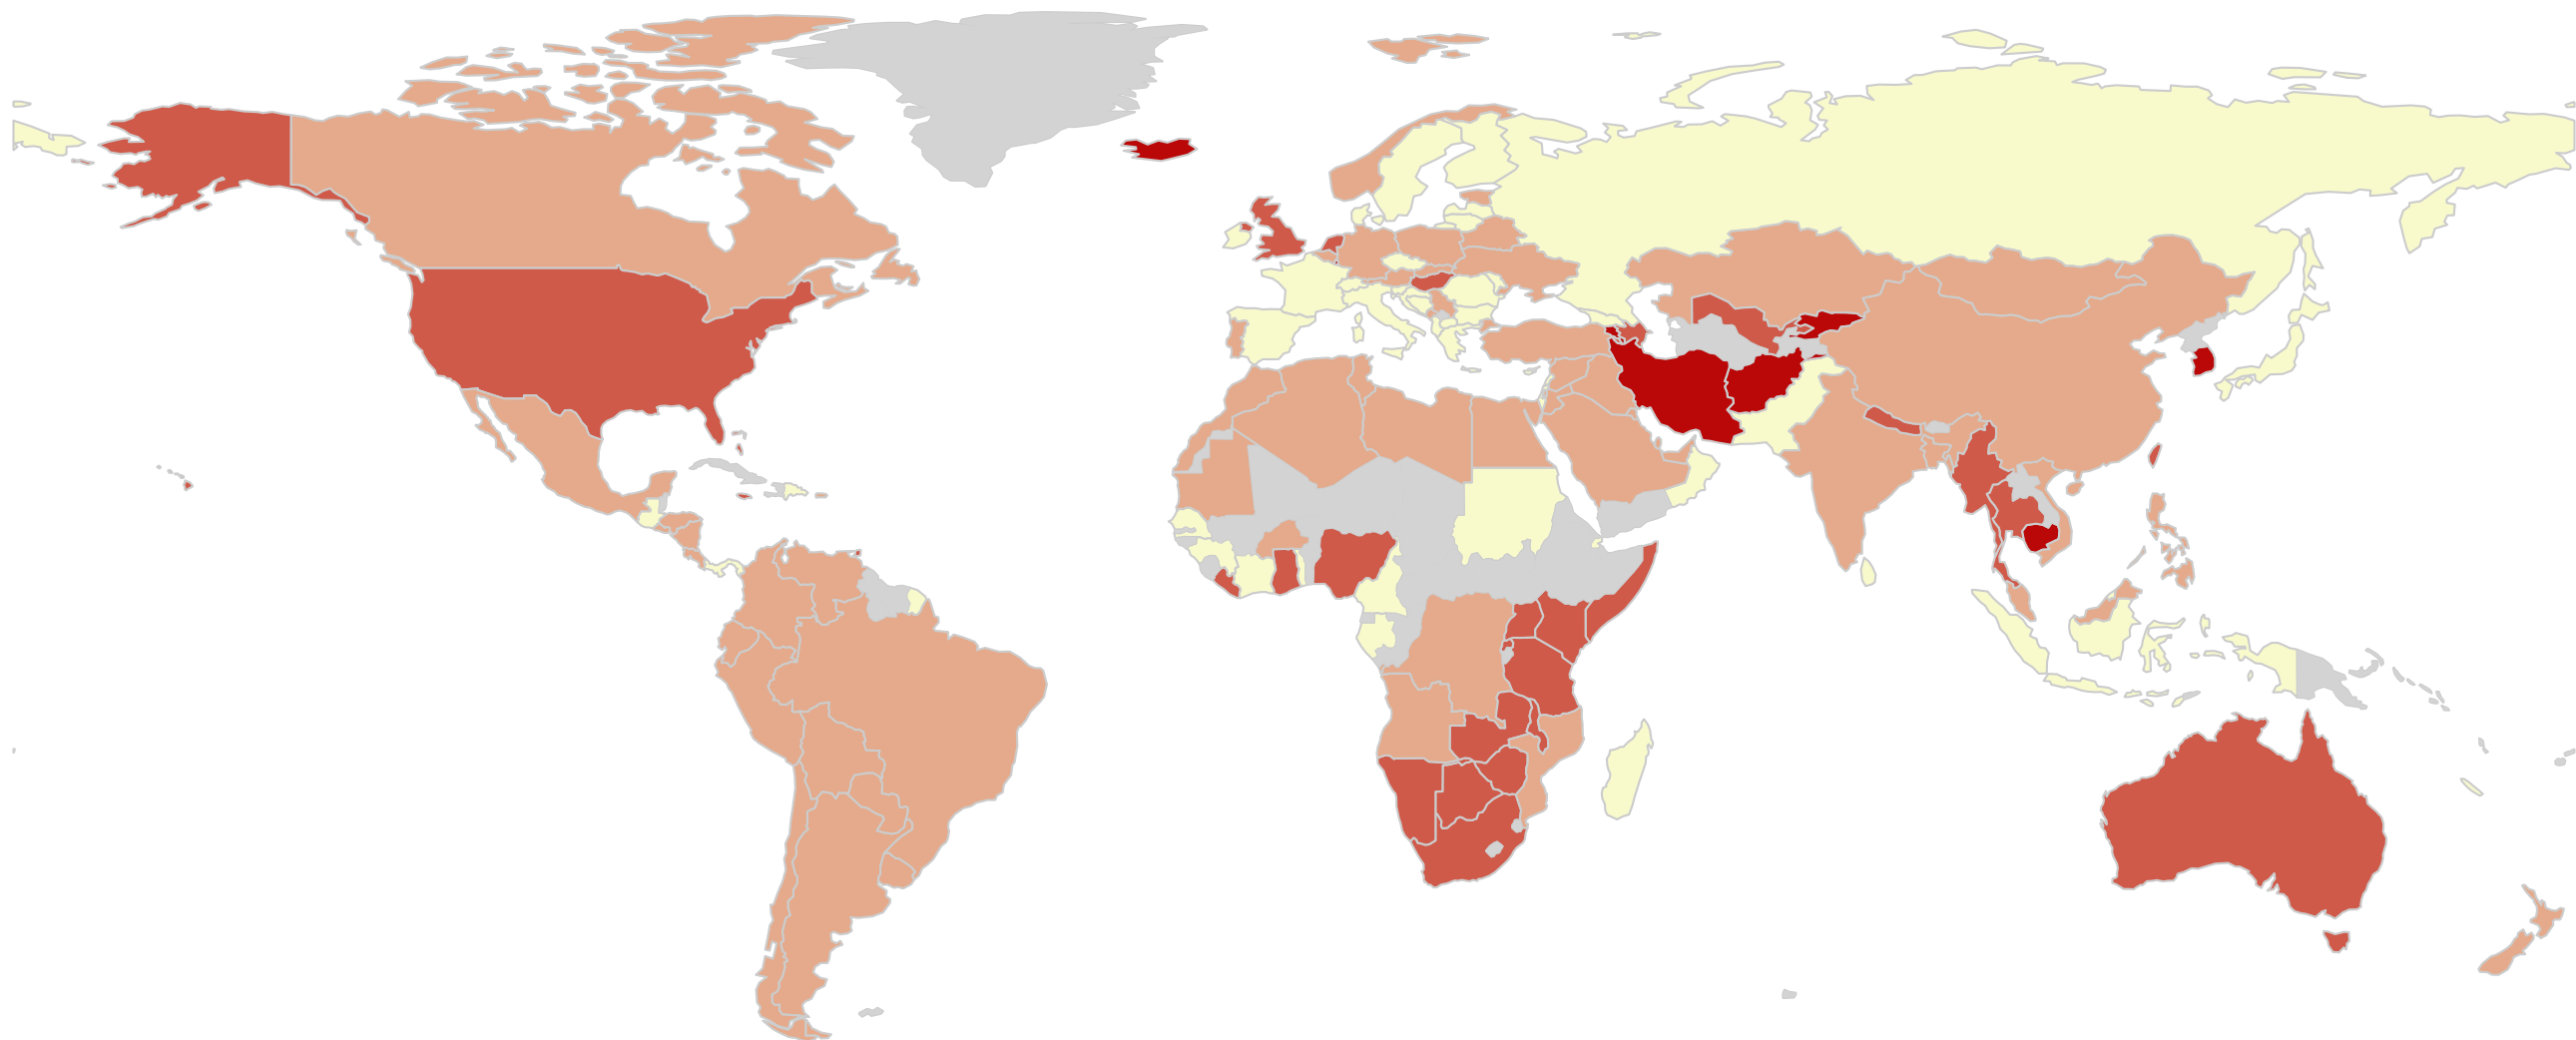

■  $\leq 0.58$  (1st Q)   ■  $\leq 0.82$  (2nd Q)   ■  $\leq 1.30$  (3rd Q)   ■  $\leq 1.90$  (4th Q)   ■ No Data

Supplement: supplementary_material [file attachment]

■ Llama 3.1 70B   ■ Llama 3.1 8B   ○ Human Preference

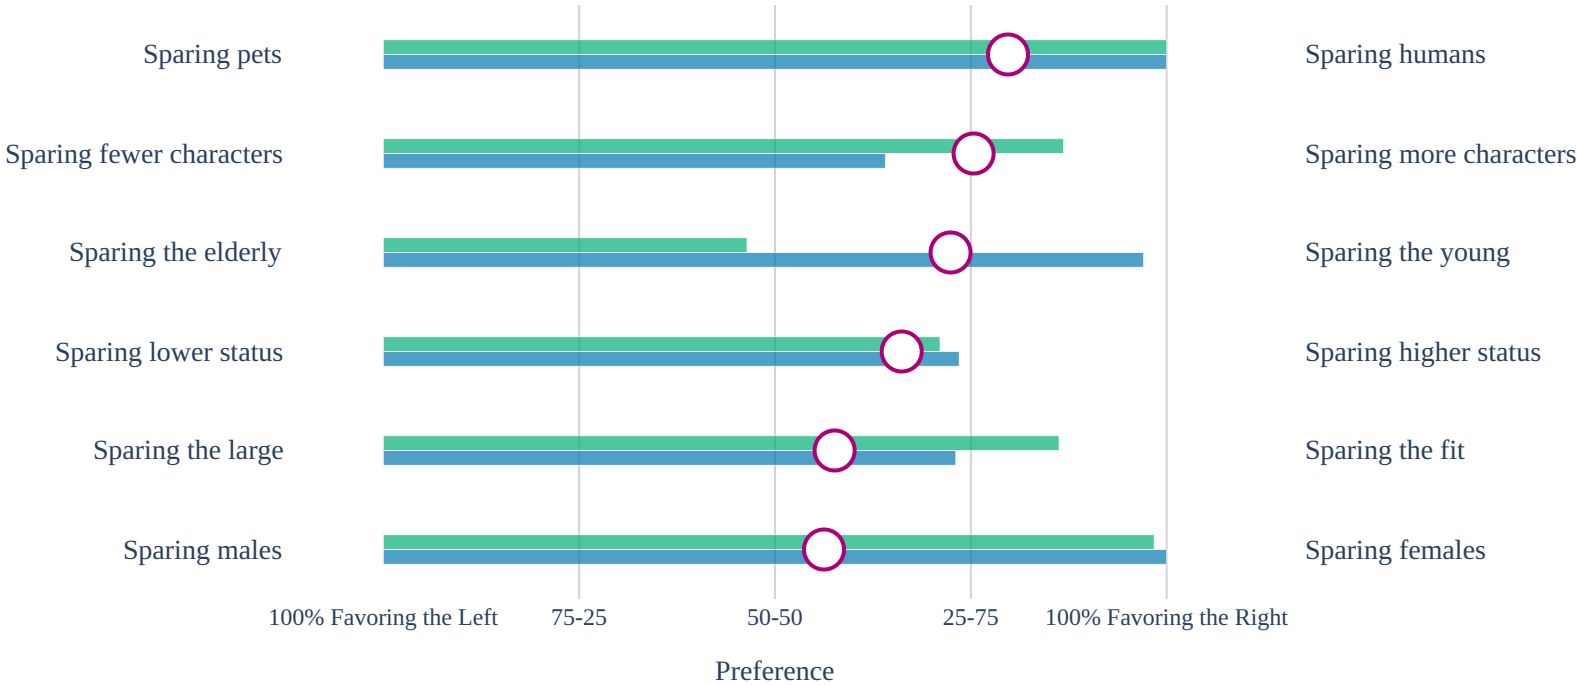

Supplement: supplementary_material [file attachment]

Phi-3.5 MoE

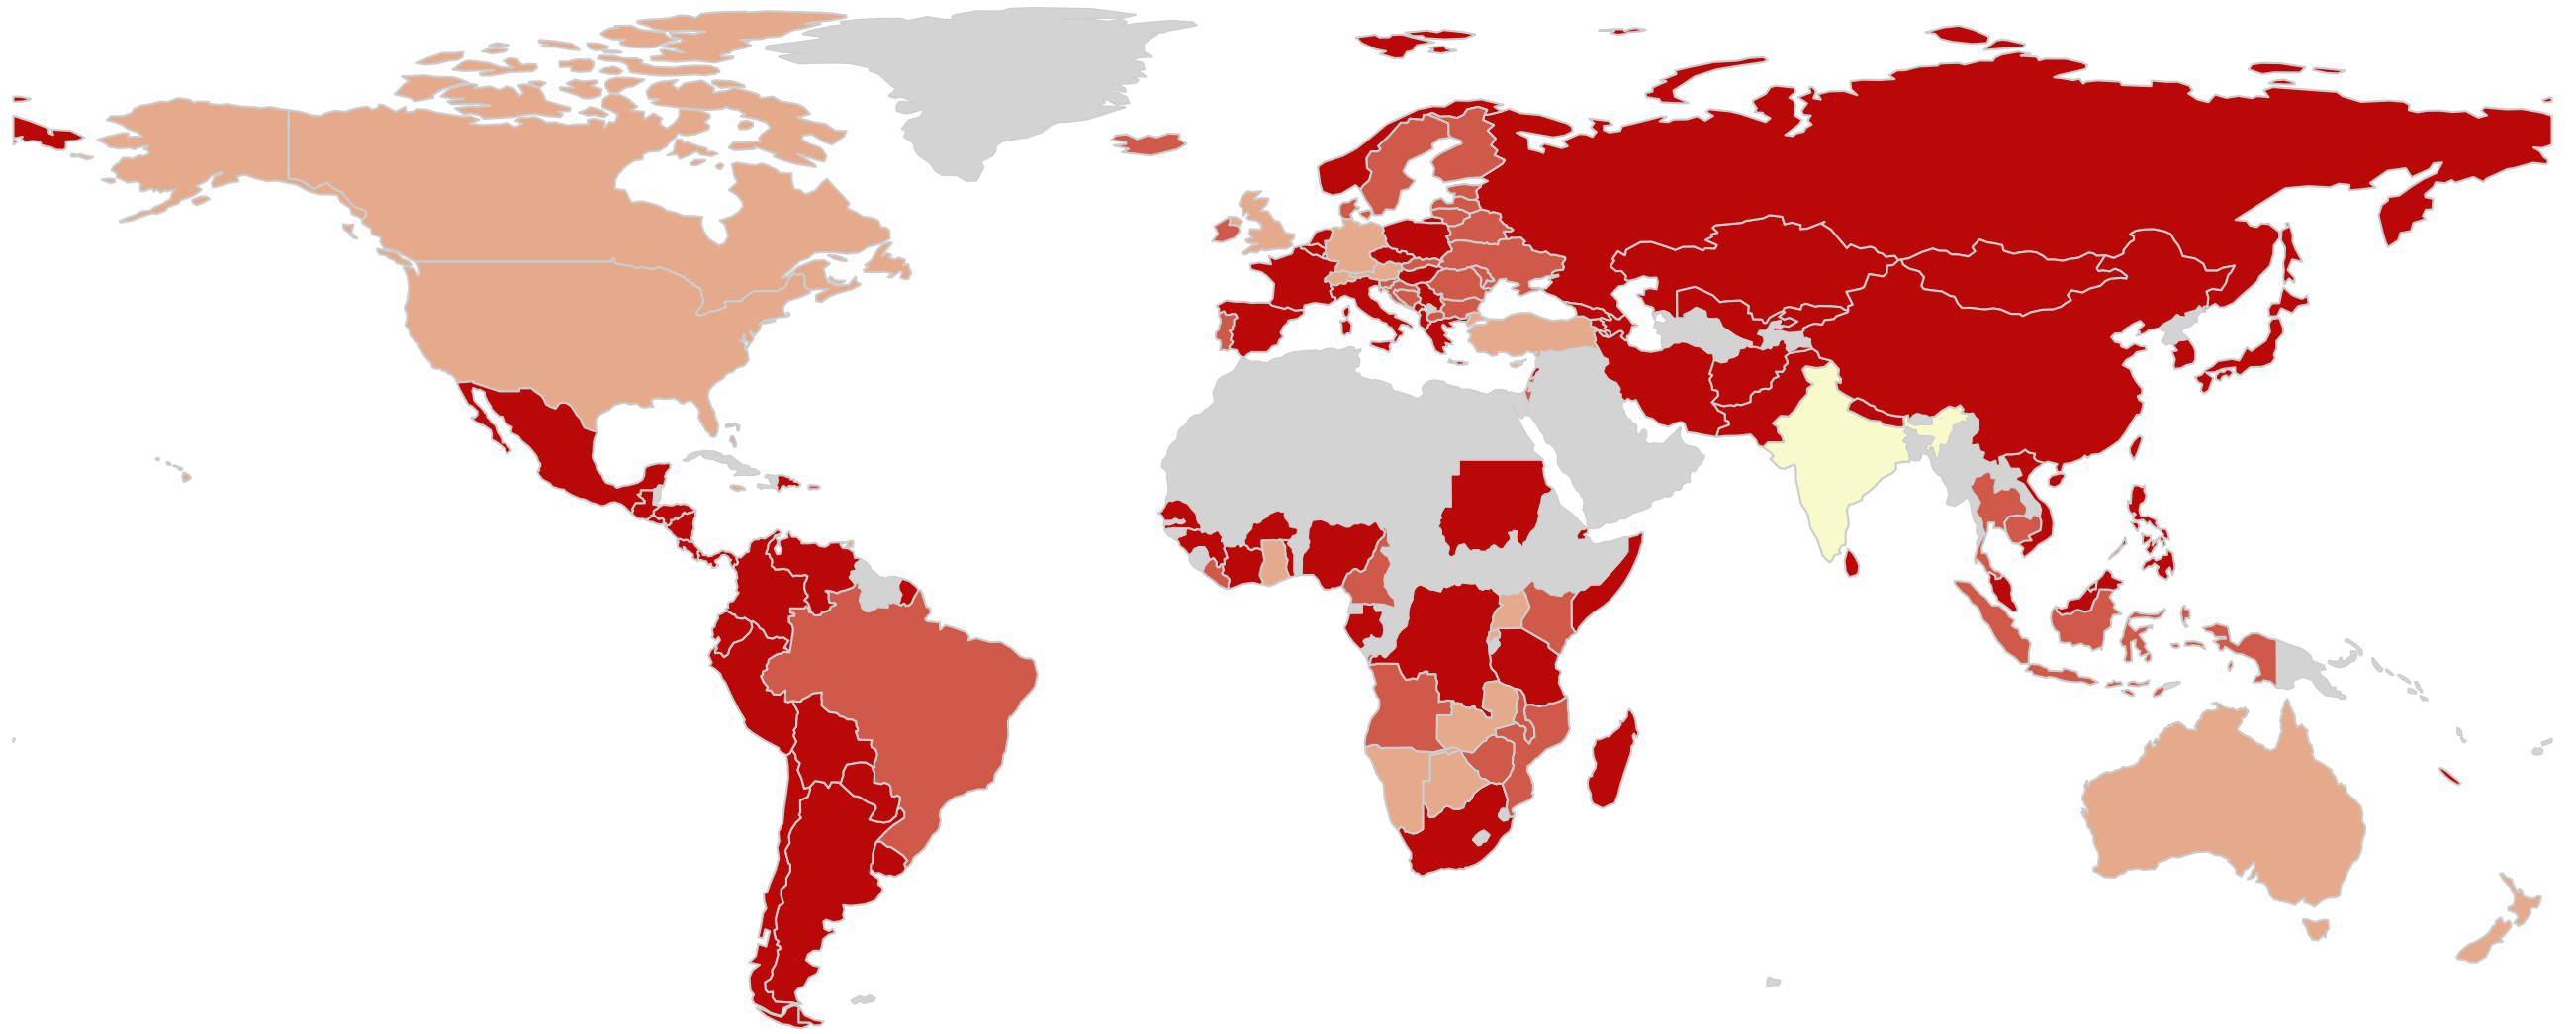

Supplement: supplementary_material [file attachment]

Gemma 2 9B

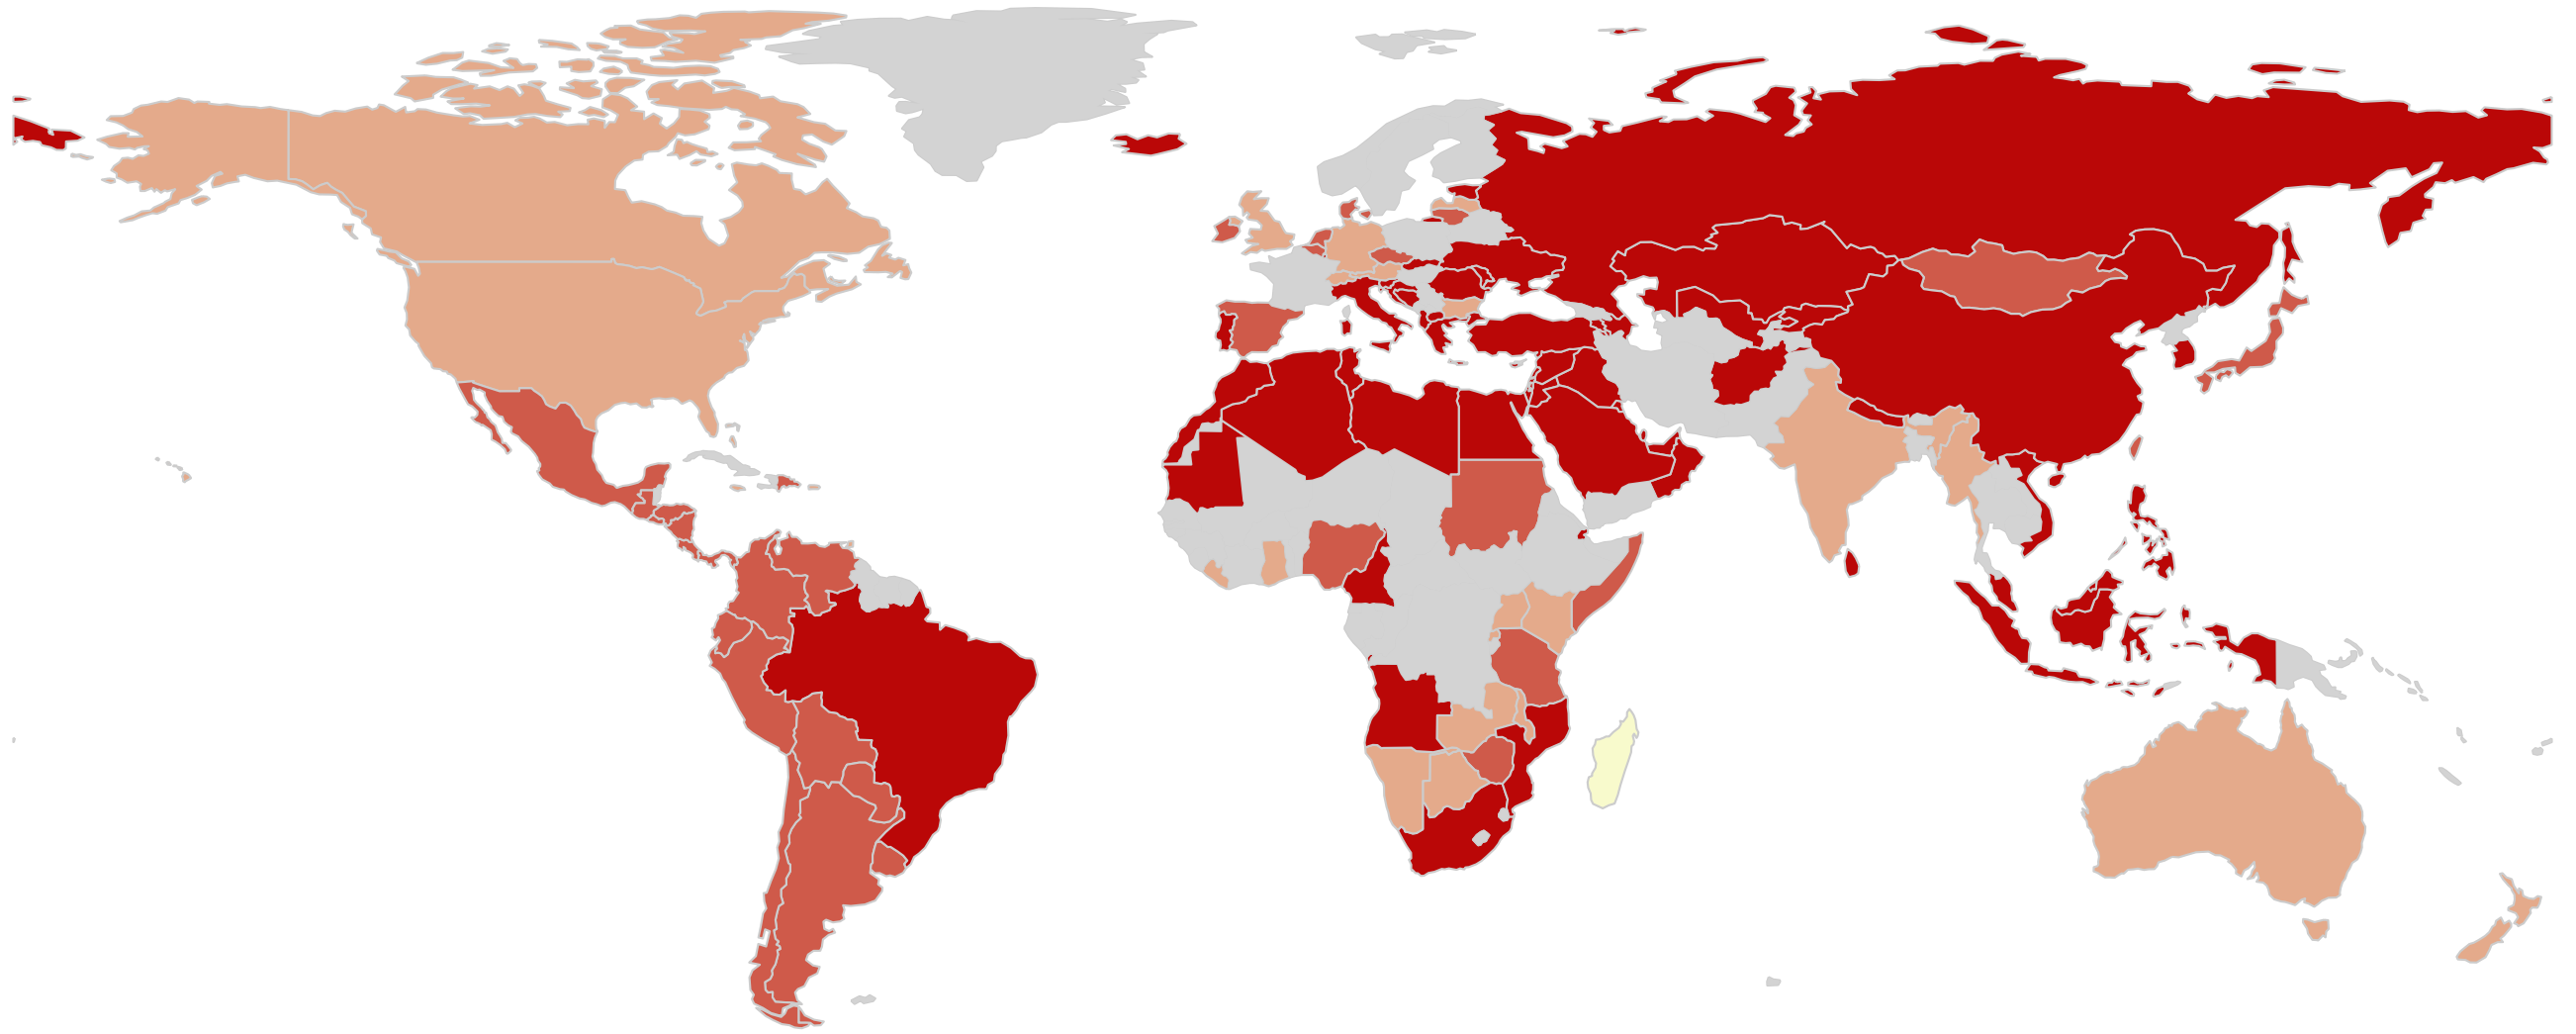

  $\leq 0.58$  (1st Q)     $\leq 0.82$  (2nd Q)     $\leq 1.30$  (3rd Q)     $\leq 1.90$  (4th Q)    No Data

Supplement: supplementary_material [file attachment]

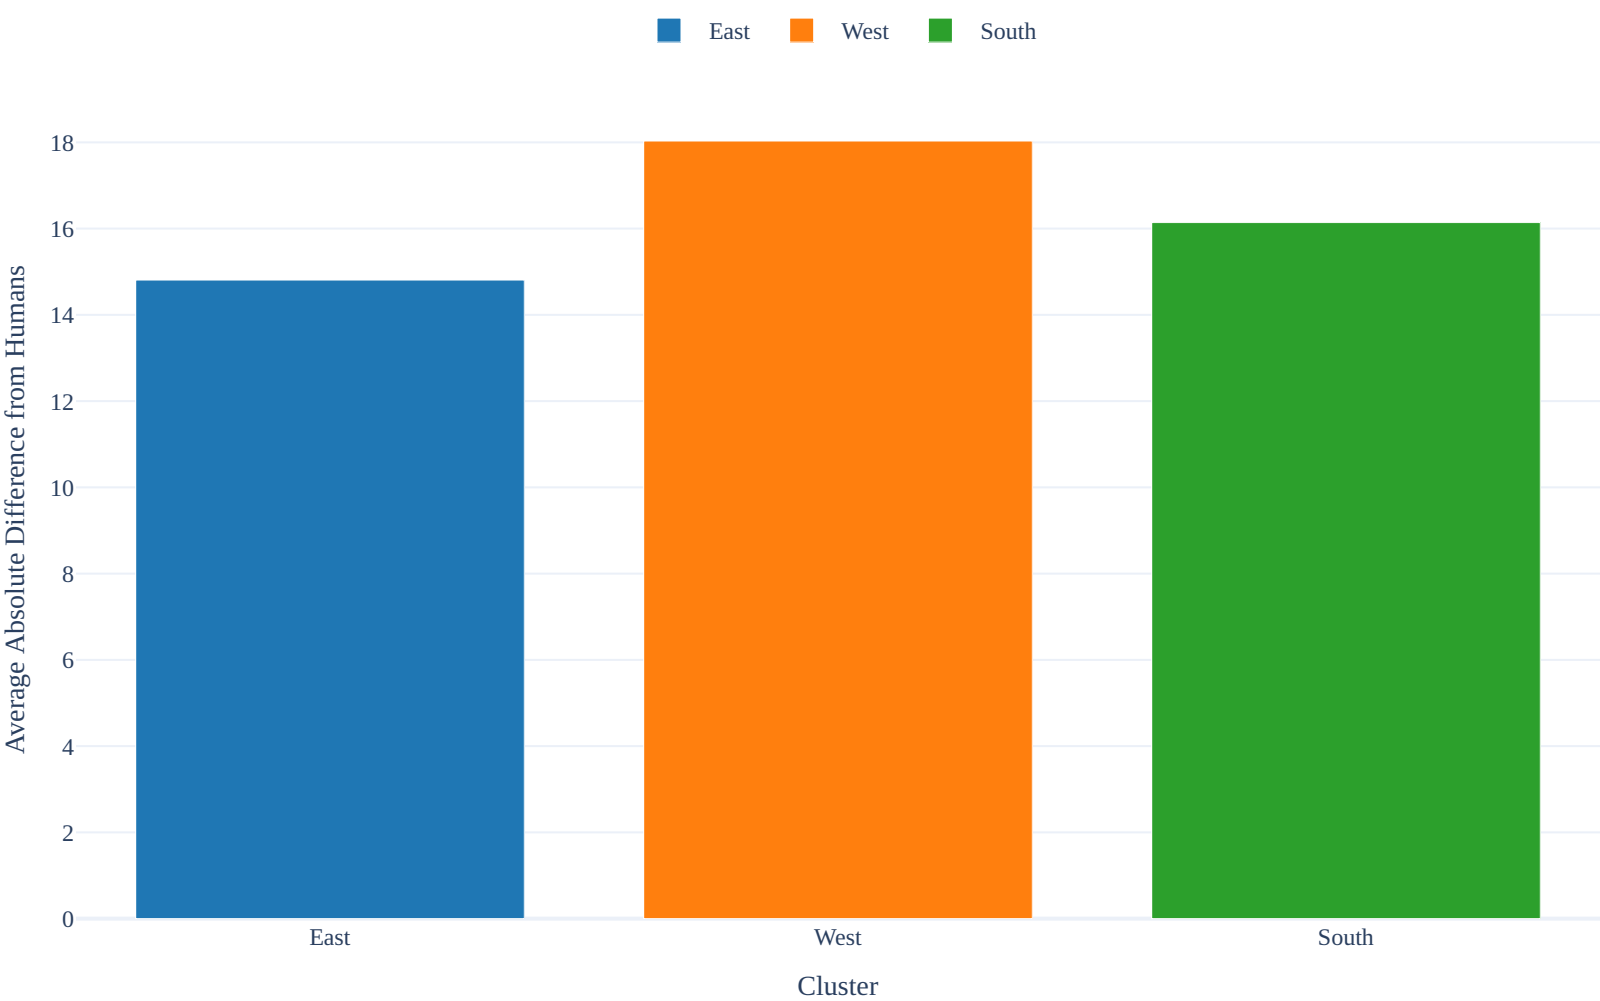

Supplement: supplementary_material [file attachment]

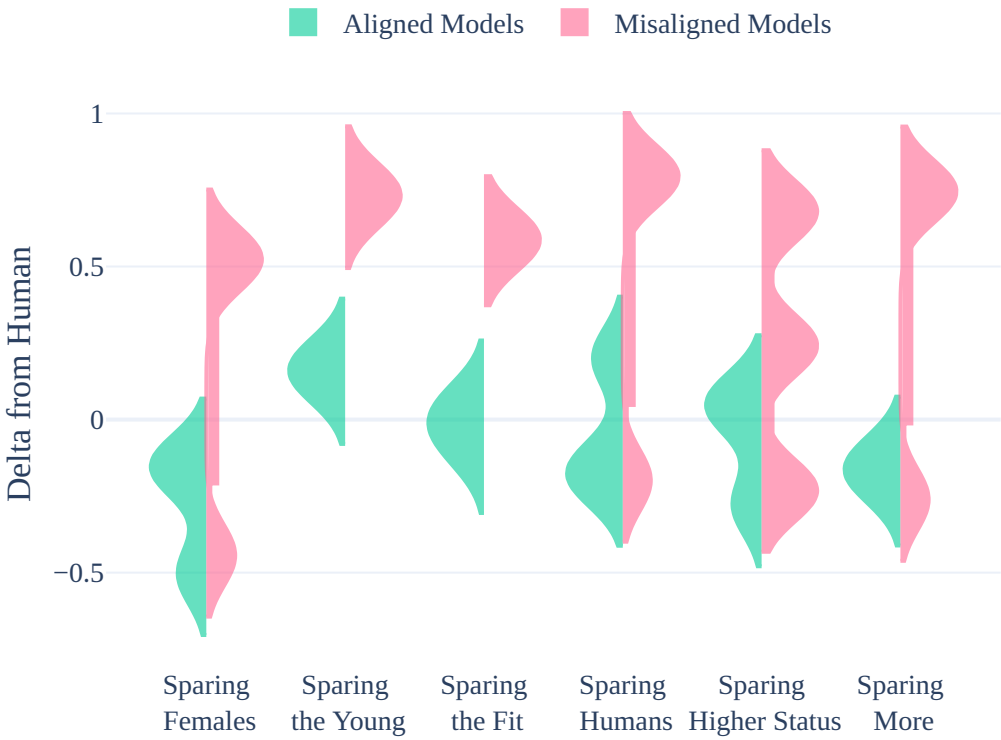

Supplement: supplementary_material [file attachment]

Cluster A Cluster B Cluster C Cluster D Human Preference

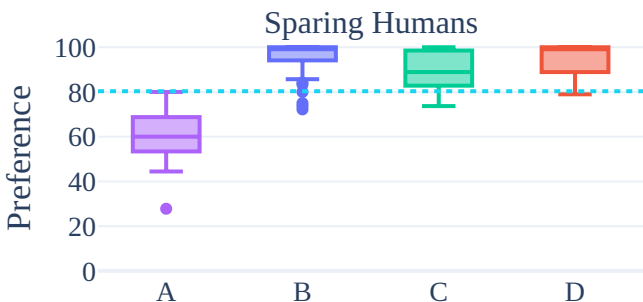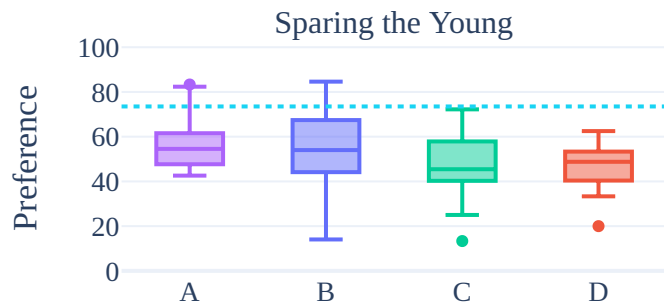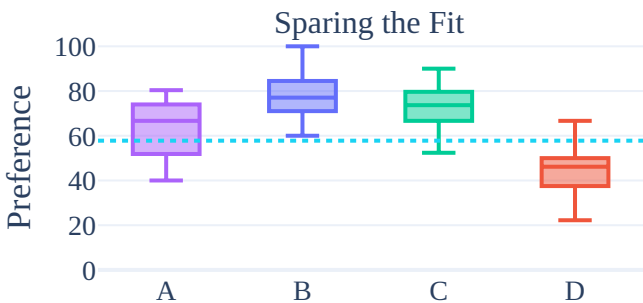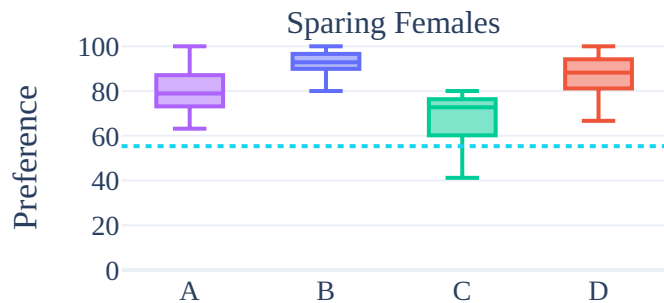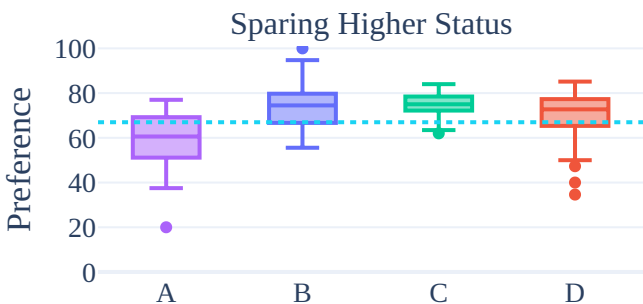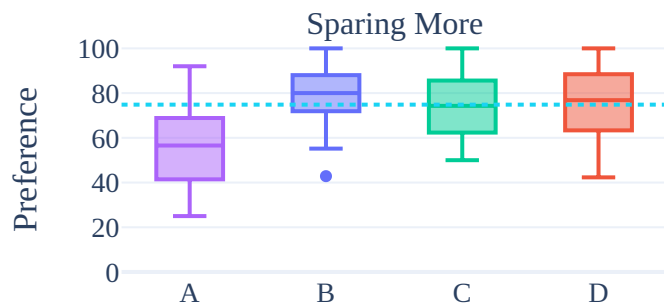

Supplement: supplementary_material [file attachment]

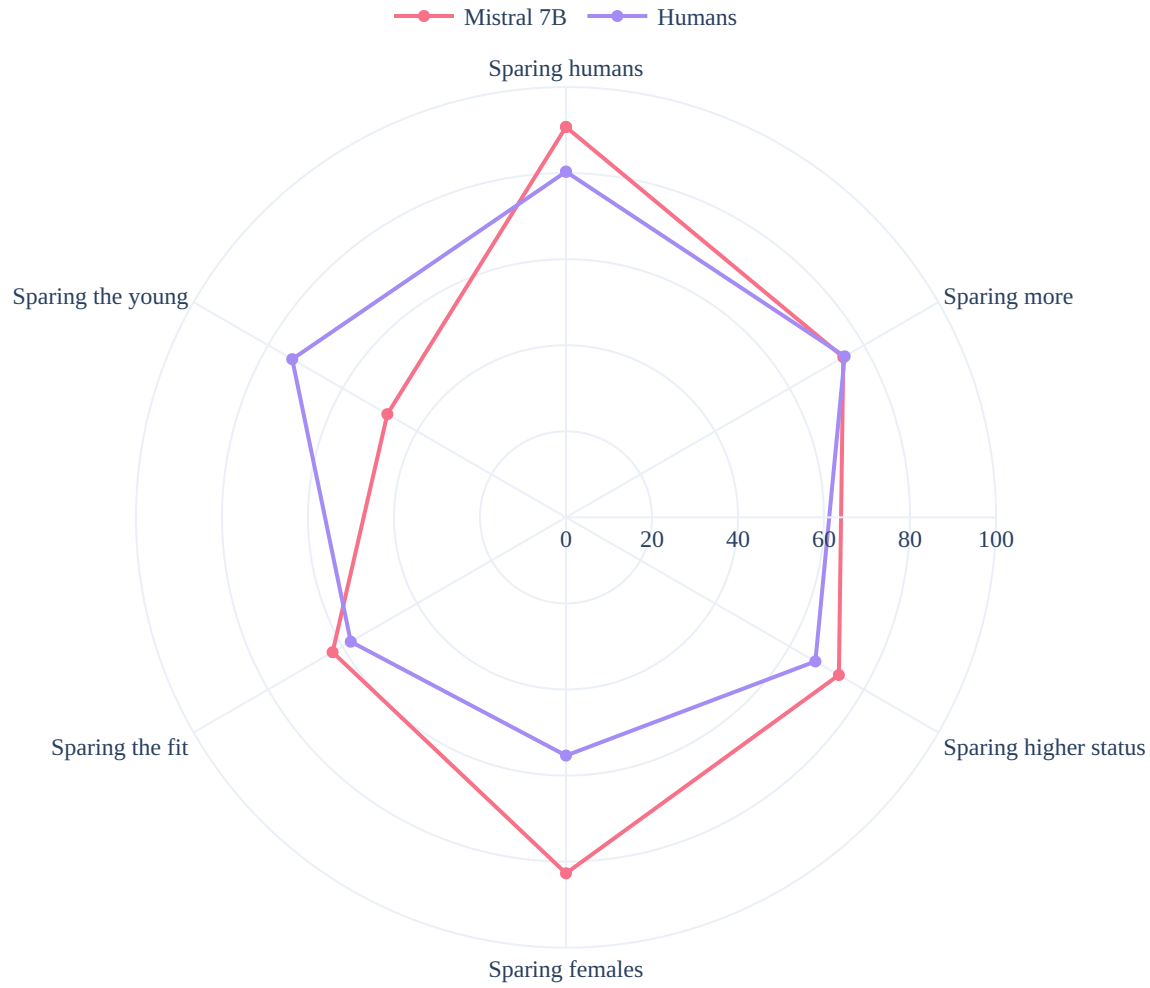

Supplement: supplementary_material [file attachment]

Llama 3 8B

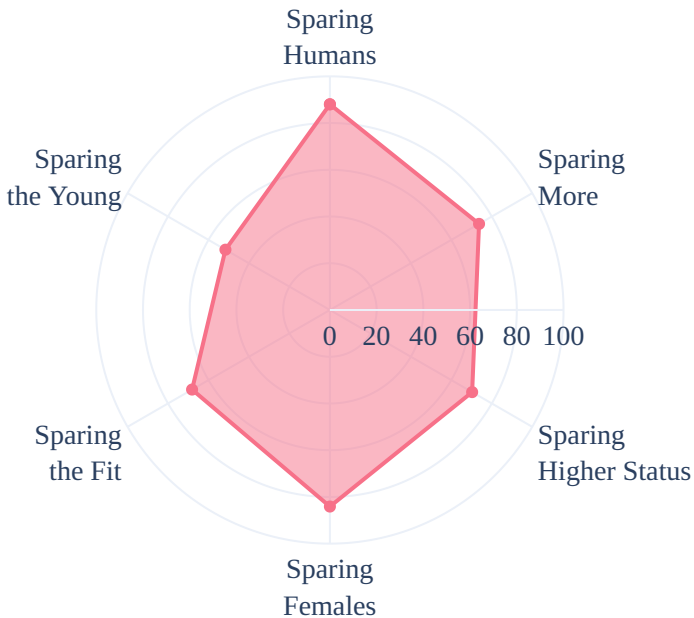

Supplement: supplementary_material [file attachment]

Llama 3.1 8B

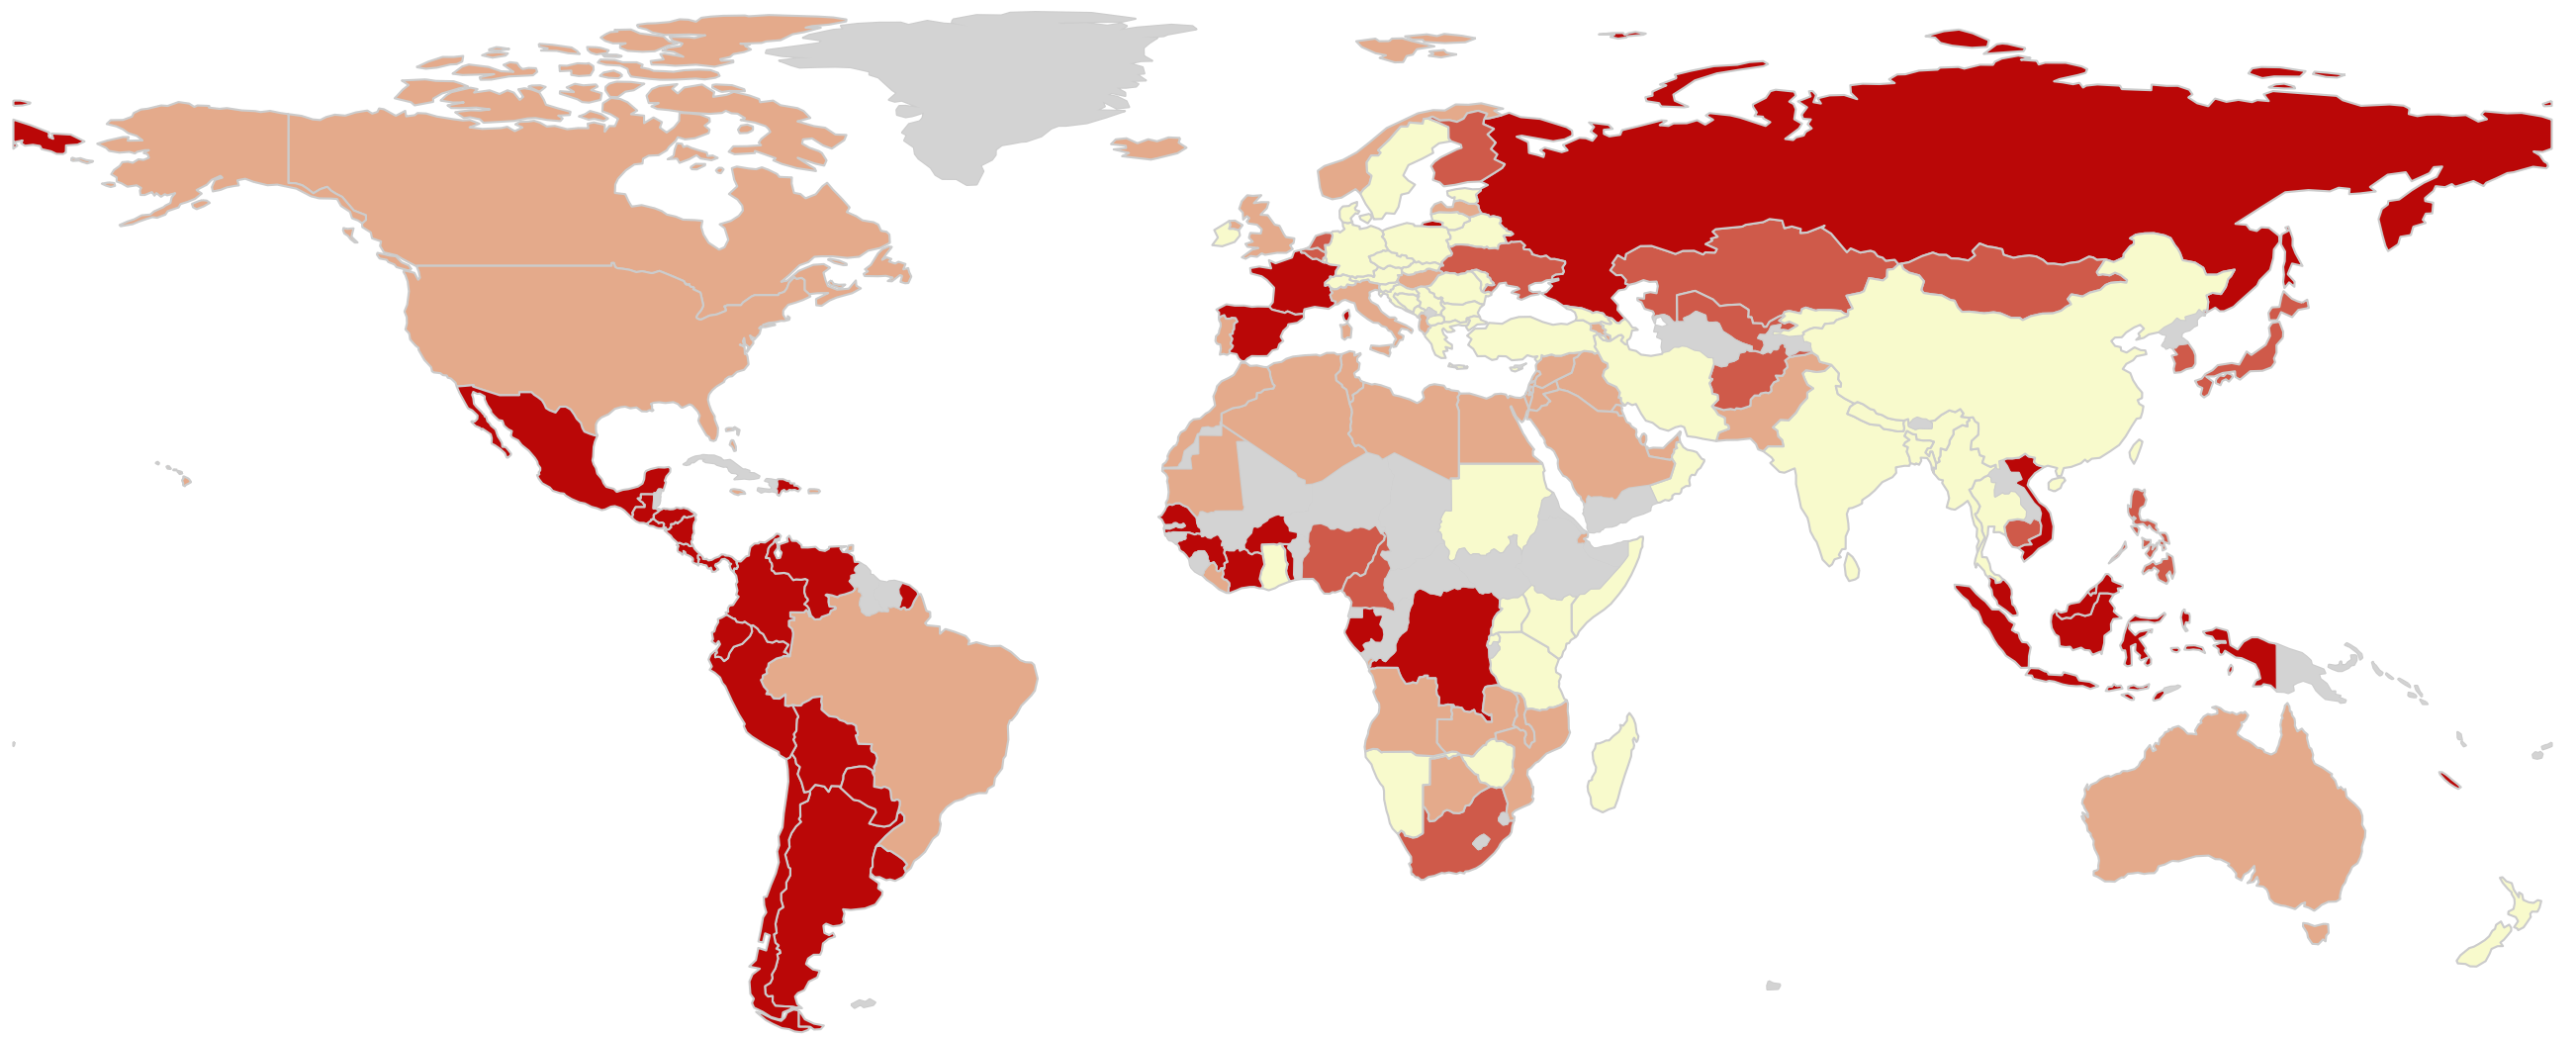

■  $\leq 0.58$  (1st Q) ■  $\leq 0.82$  (2nd Q) ■  $\leq 1.30$  (3rd Q) ■  $\leq 1.90$  (4th Q) ■ No Data

Supplement: supplementary_material [file attachment]

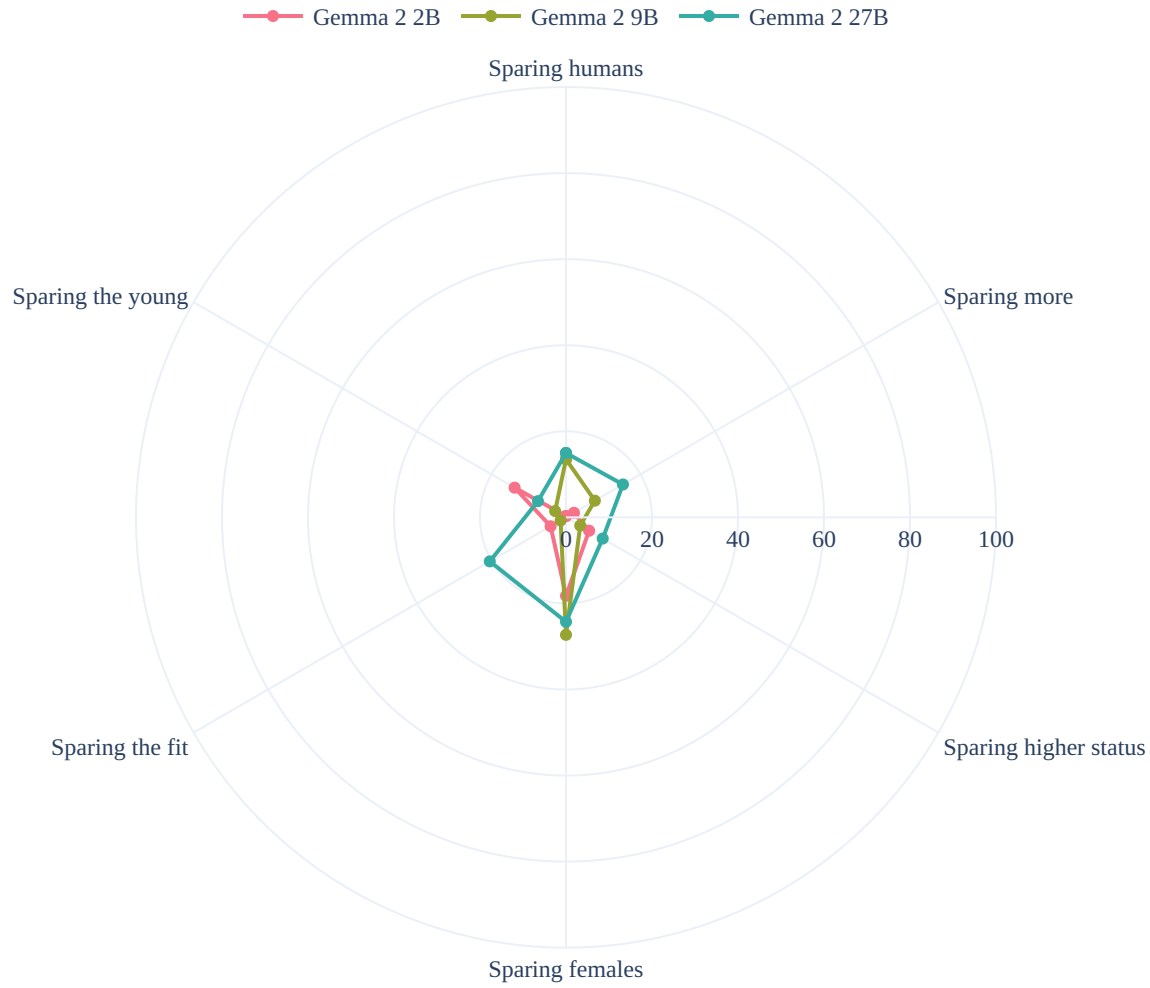

Supplement: supplementary_material [file attachment]

Gemma 2 2B

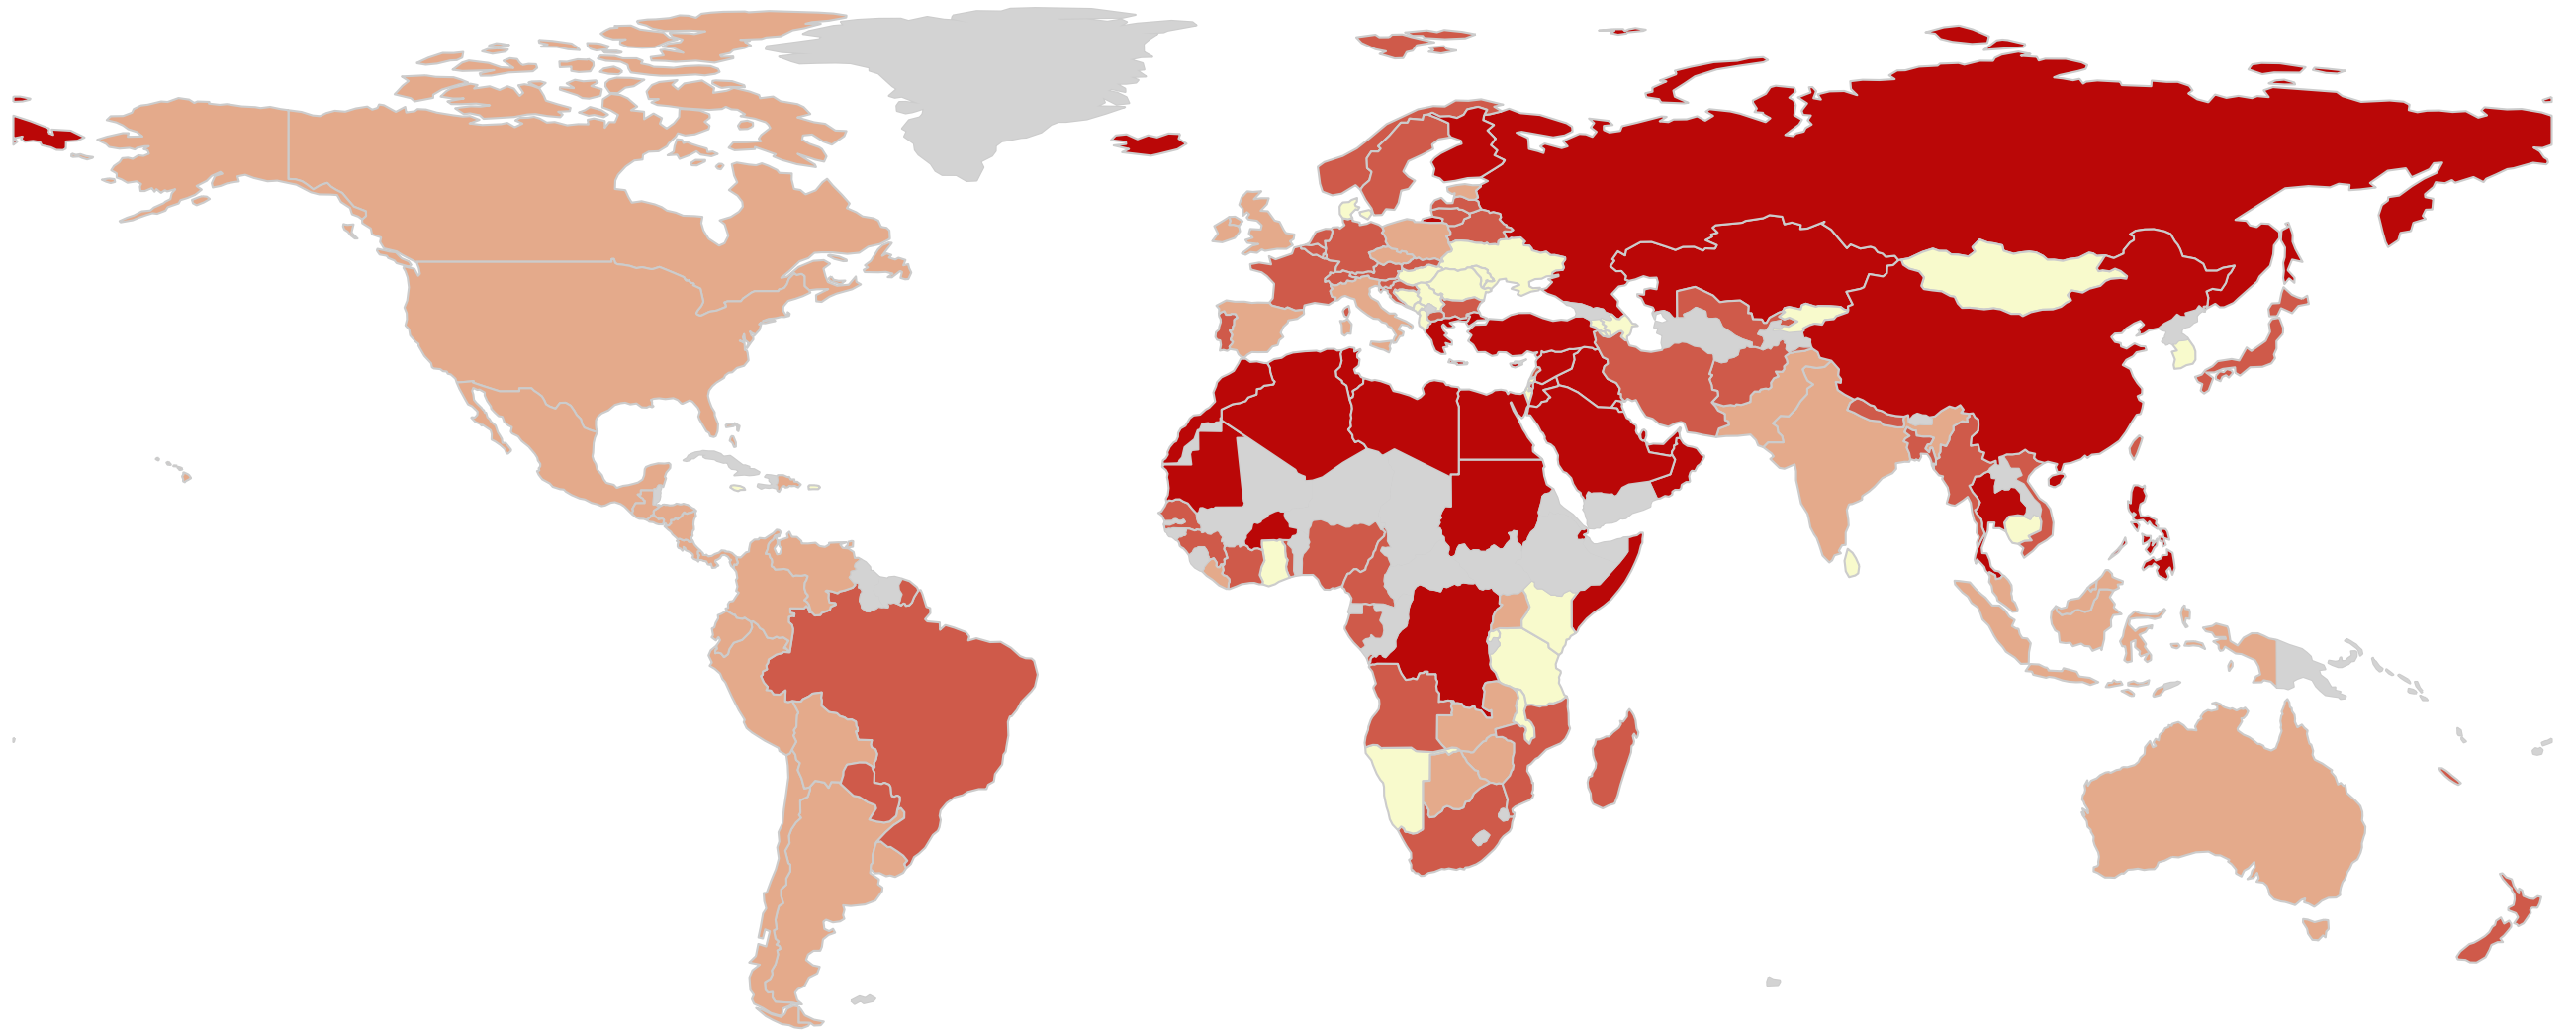

Supplement: supplementary_material [file attachment]

Cluster A Cluster B Cluster C Cluster D Human Preference

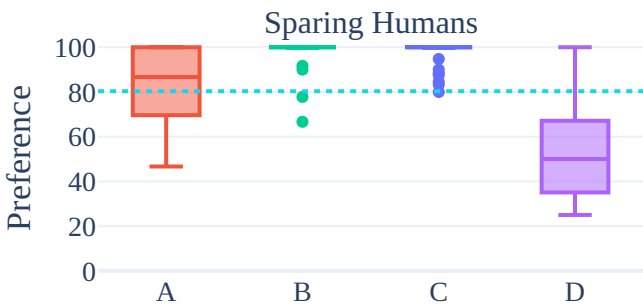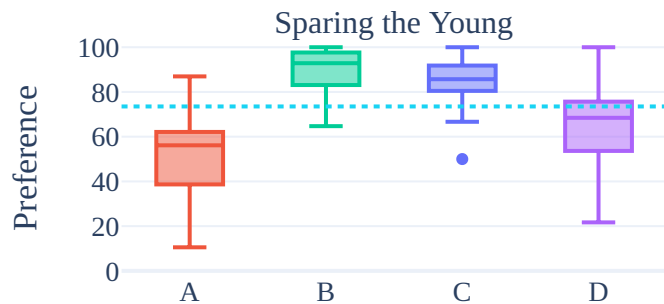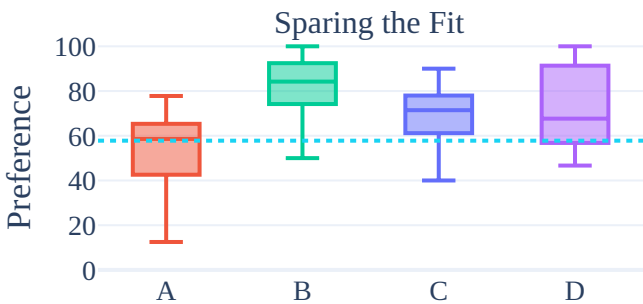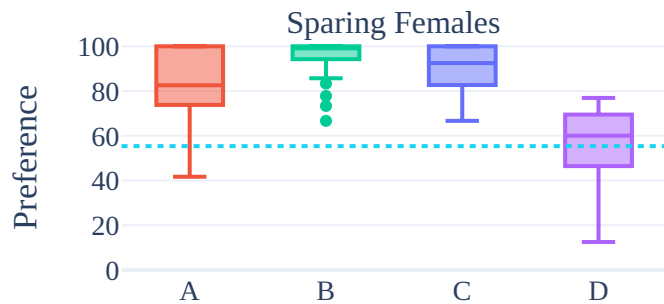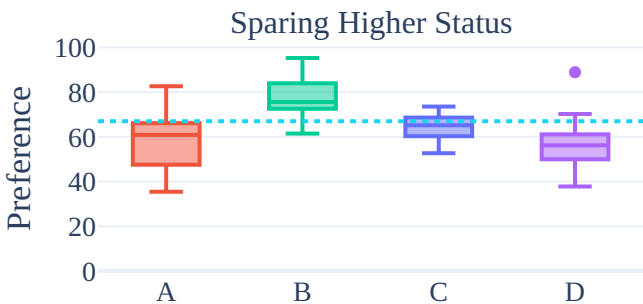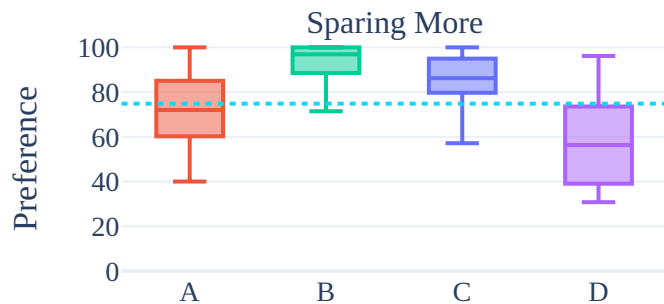

Supplement: supplementary_material [file attachment]

■ Llama 3.1 8B ○ Human Preference

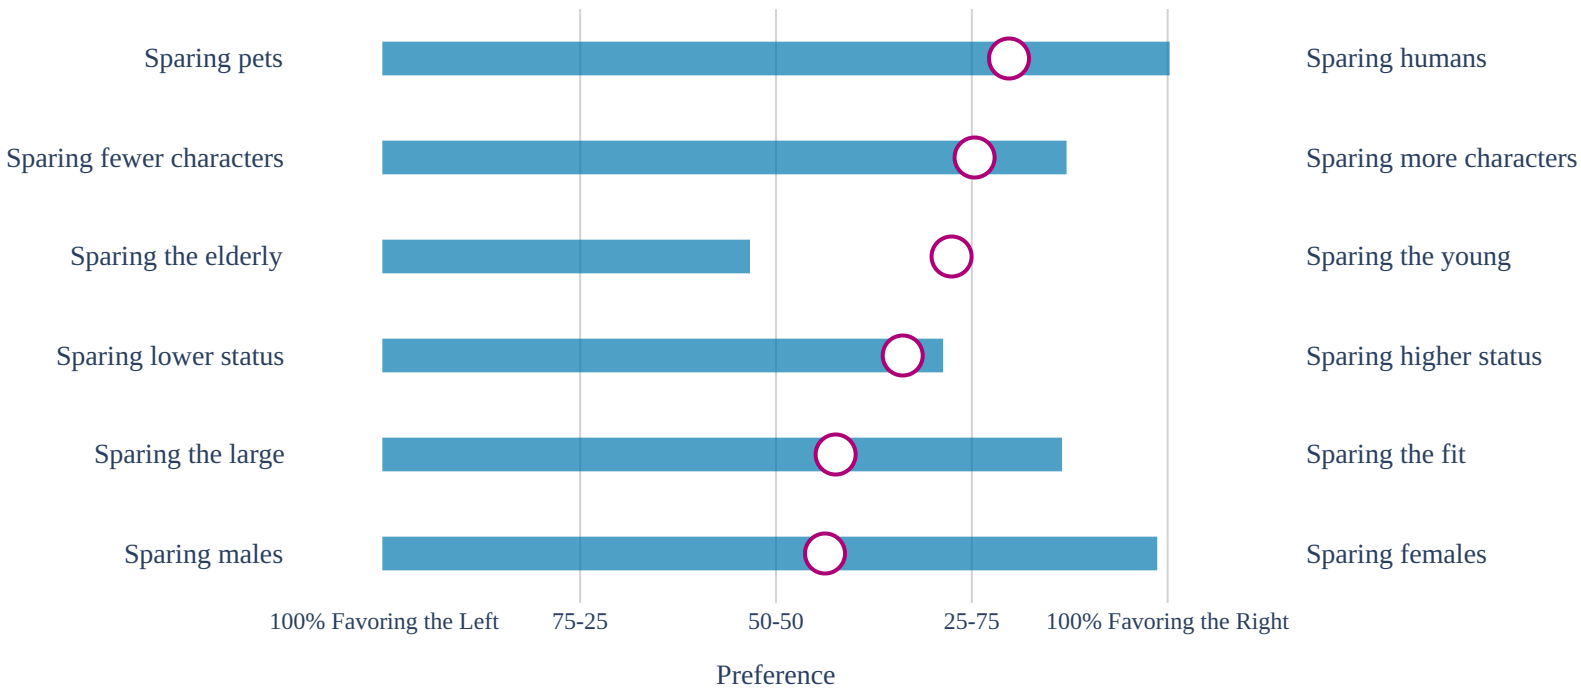

Supplement: supplementary_material [file attachment]

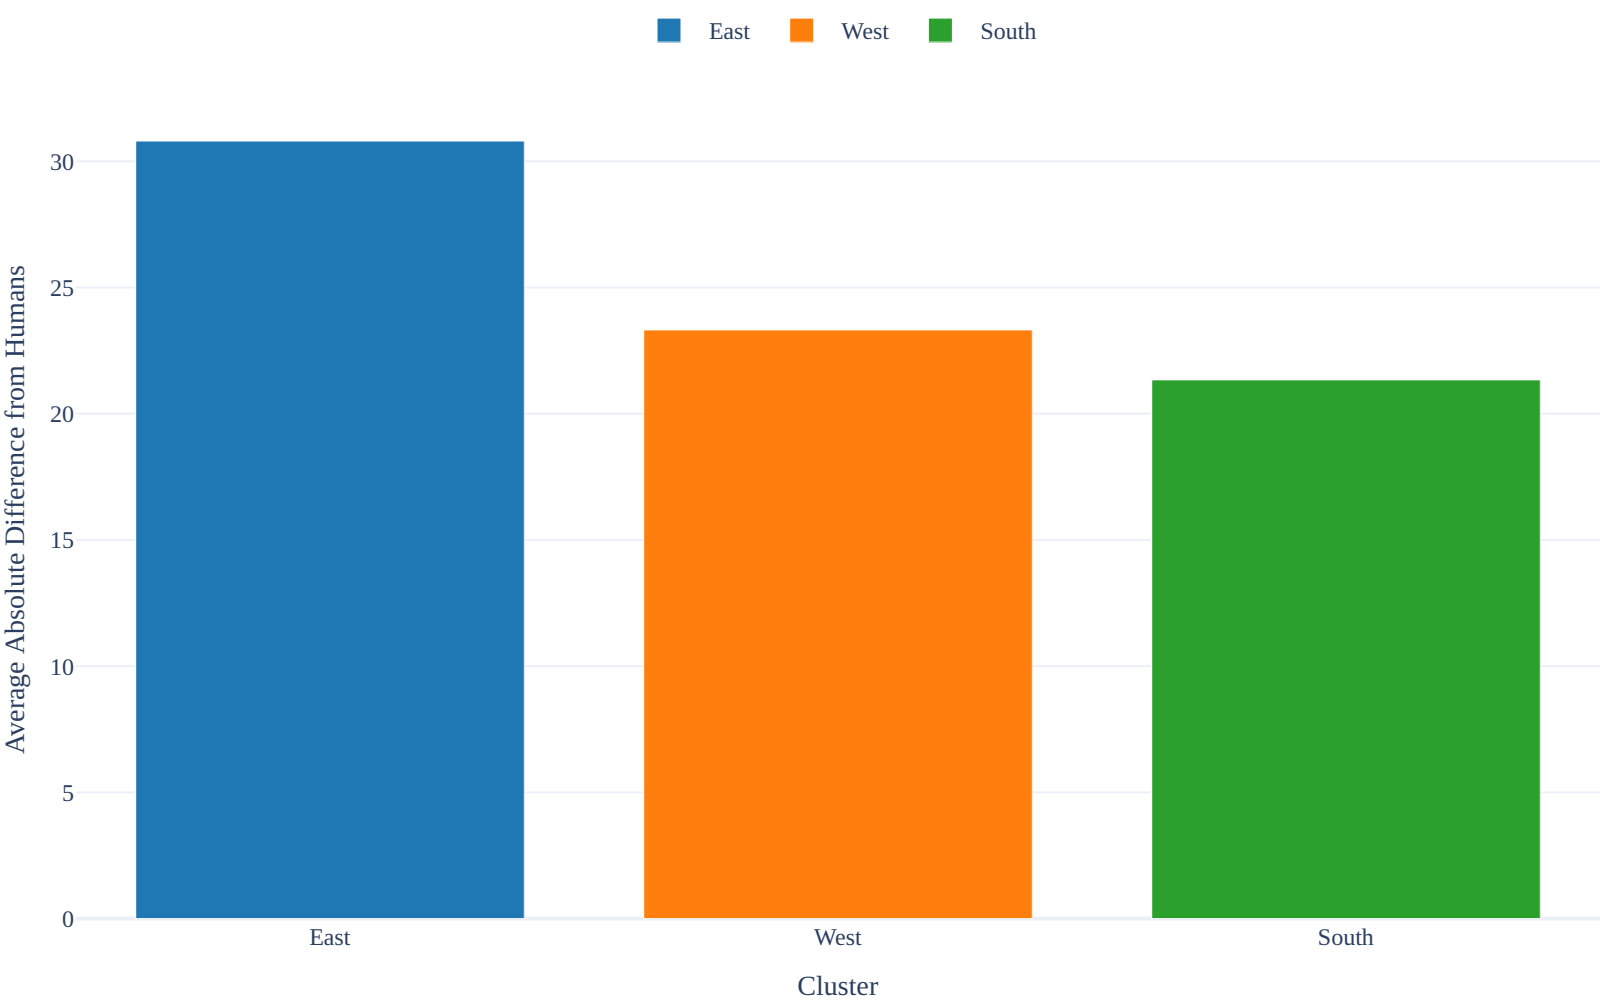

Supplement: supplementary_material [file attachment]

Llama 3 8B

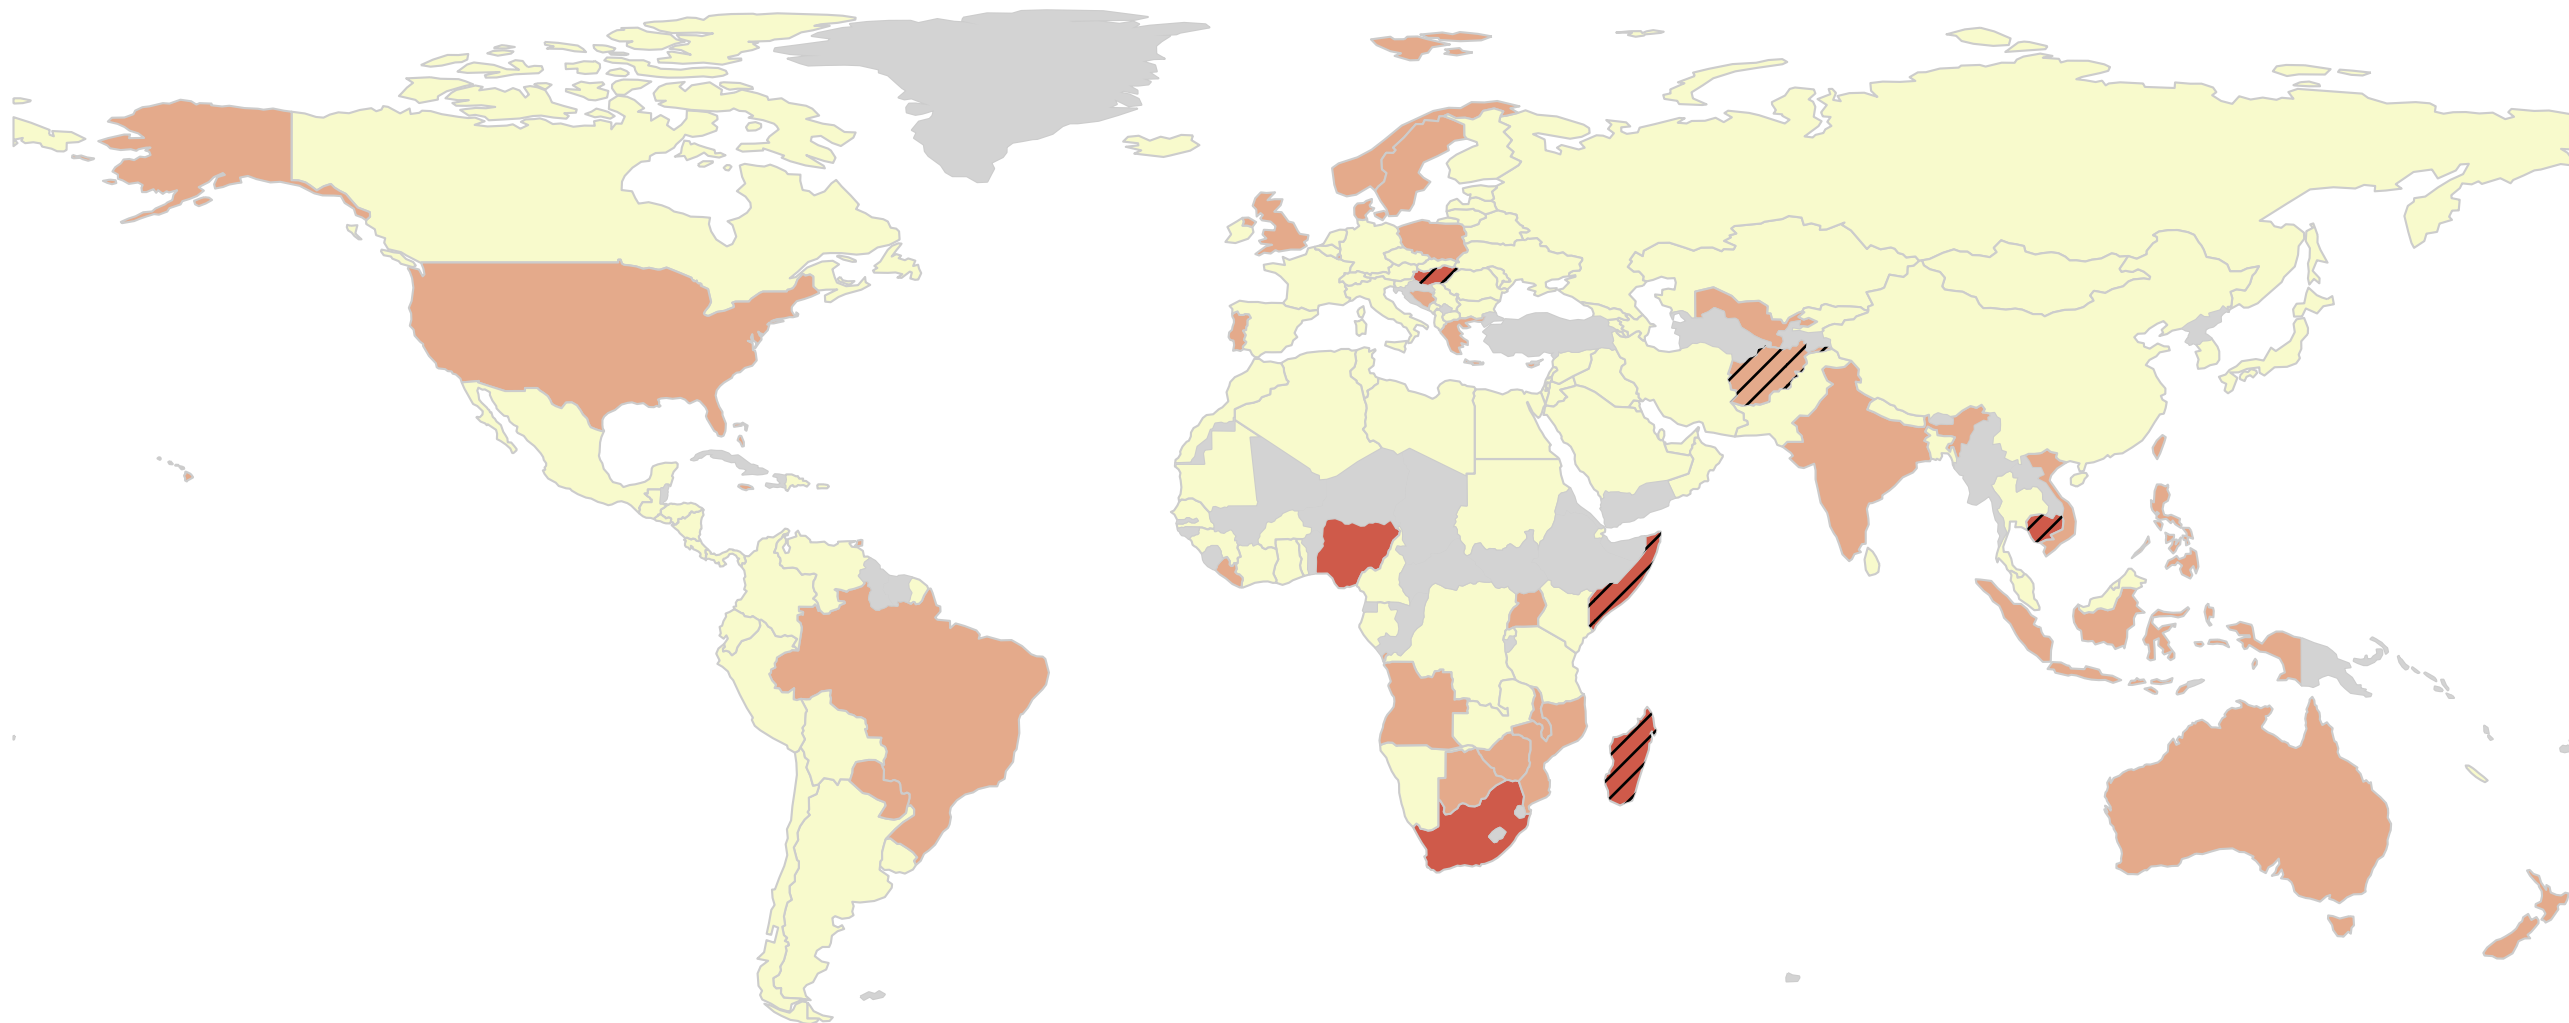

$\leq 0.58$  (1st Q)    $\leq 0.82$  (2nd Q)    $\leq 1.30$  (3rd Q)    $\leq 1.90$  (4th Q)   No Data   High Refusal

Supplement: supplementary_material [file attachment]

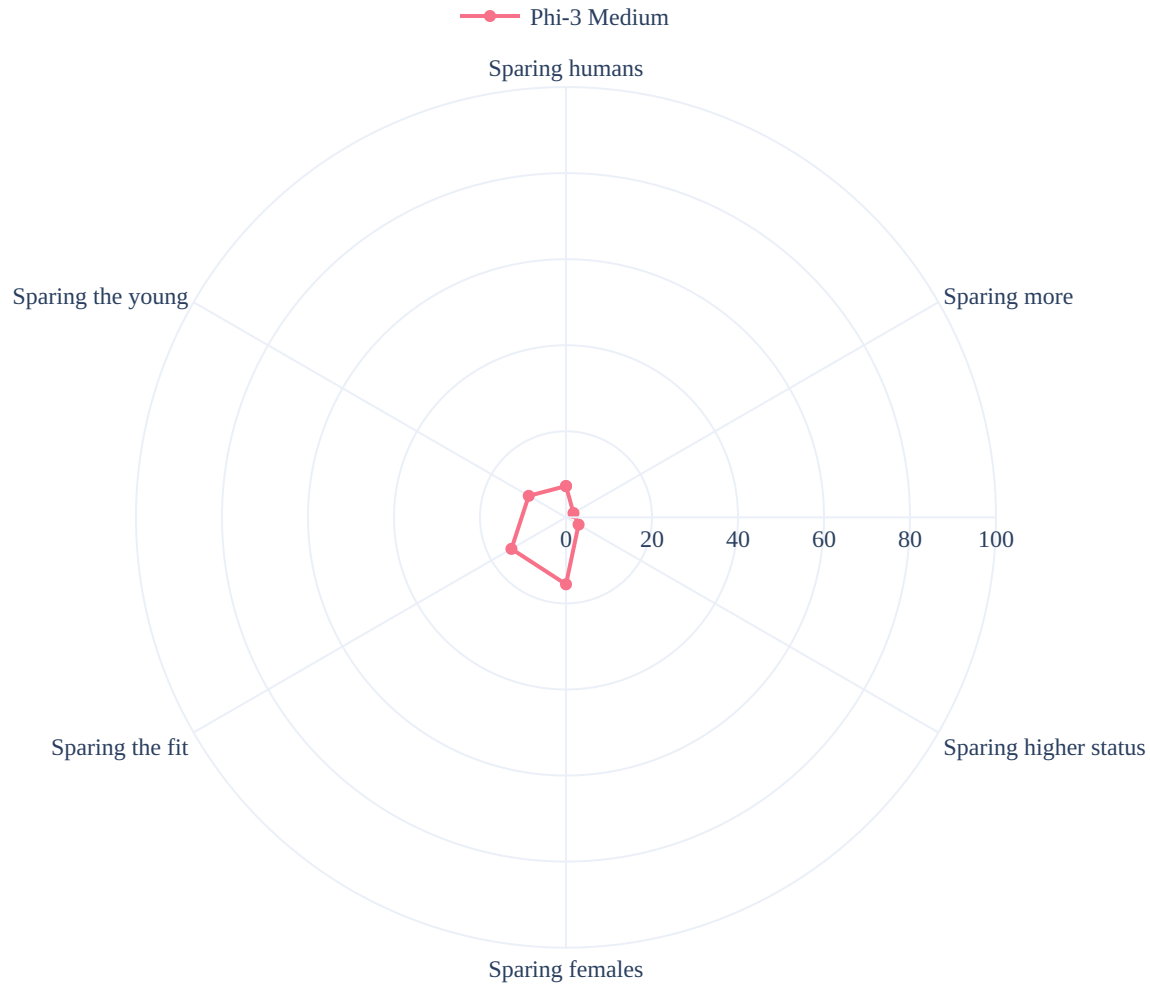

Supplement: supplementary_material [file attachment]

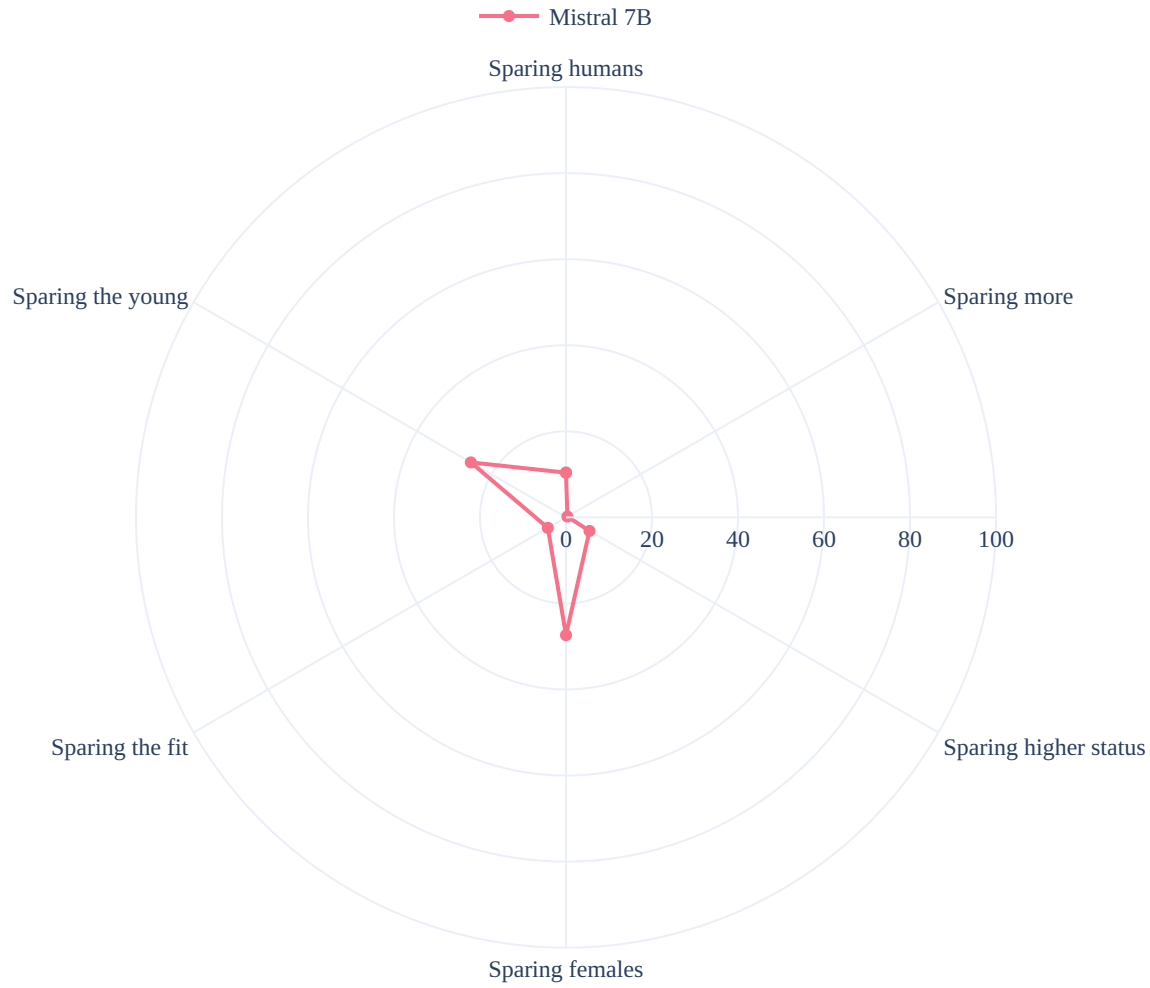

Supplement: supplementary_material [file attachment]

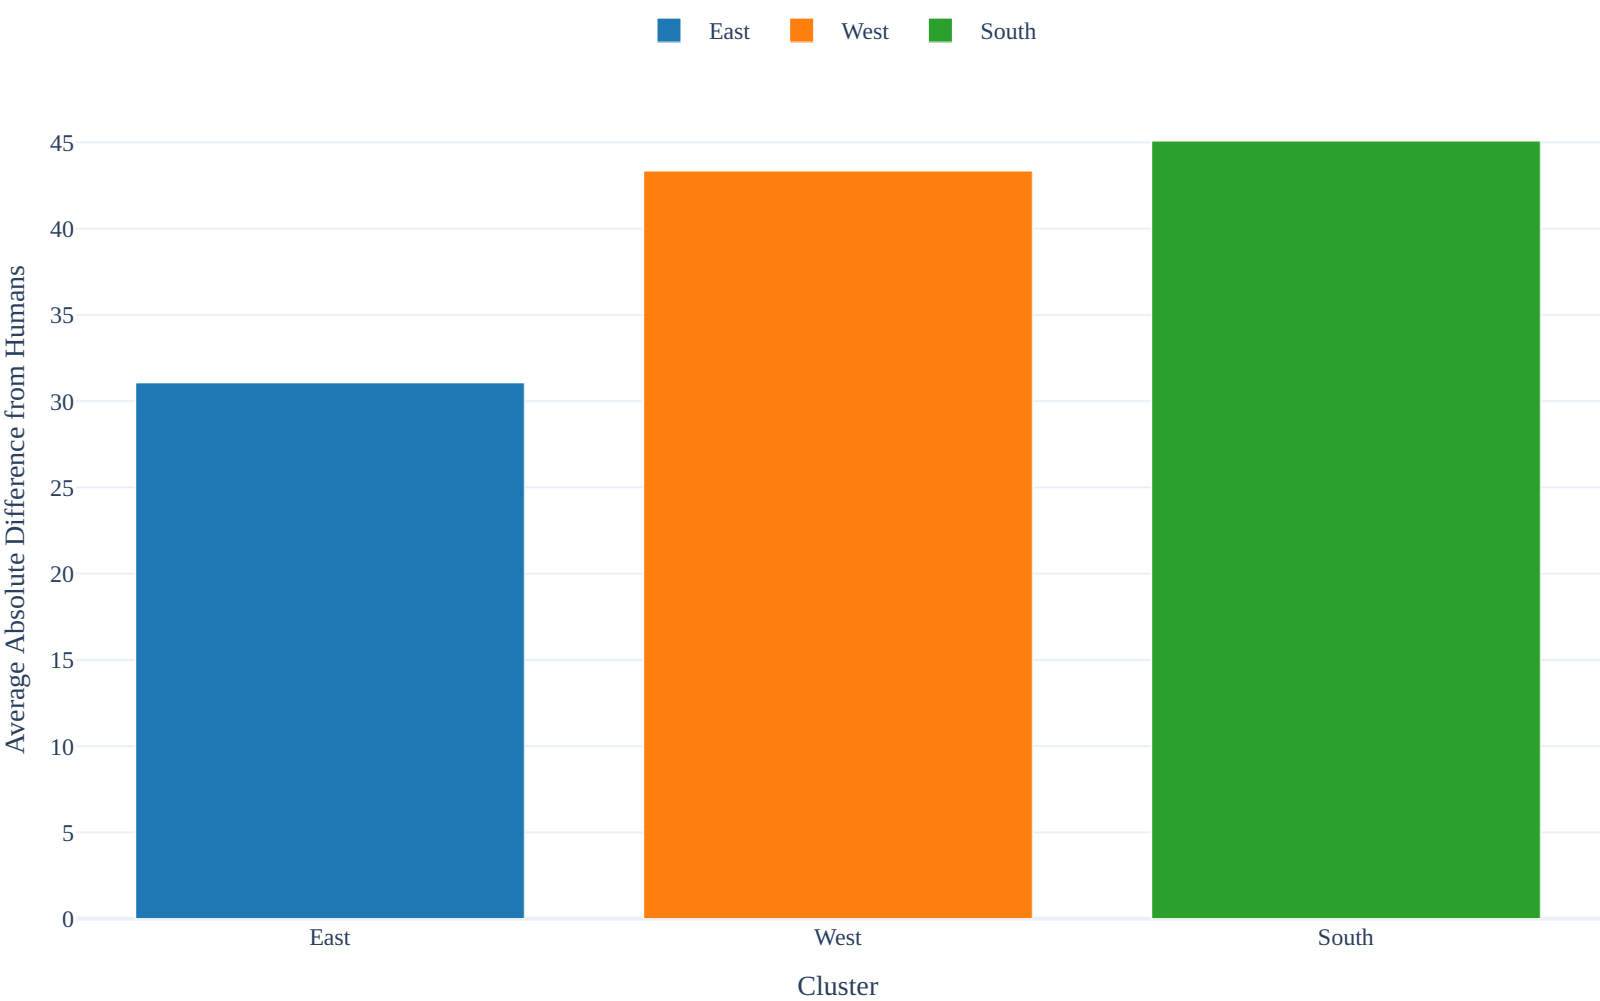

Supplement: supplementary_material [file attachment]

—●— Mistral 7B —●— Humans

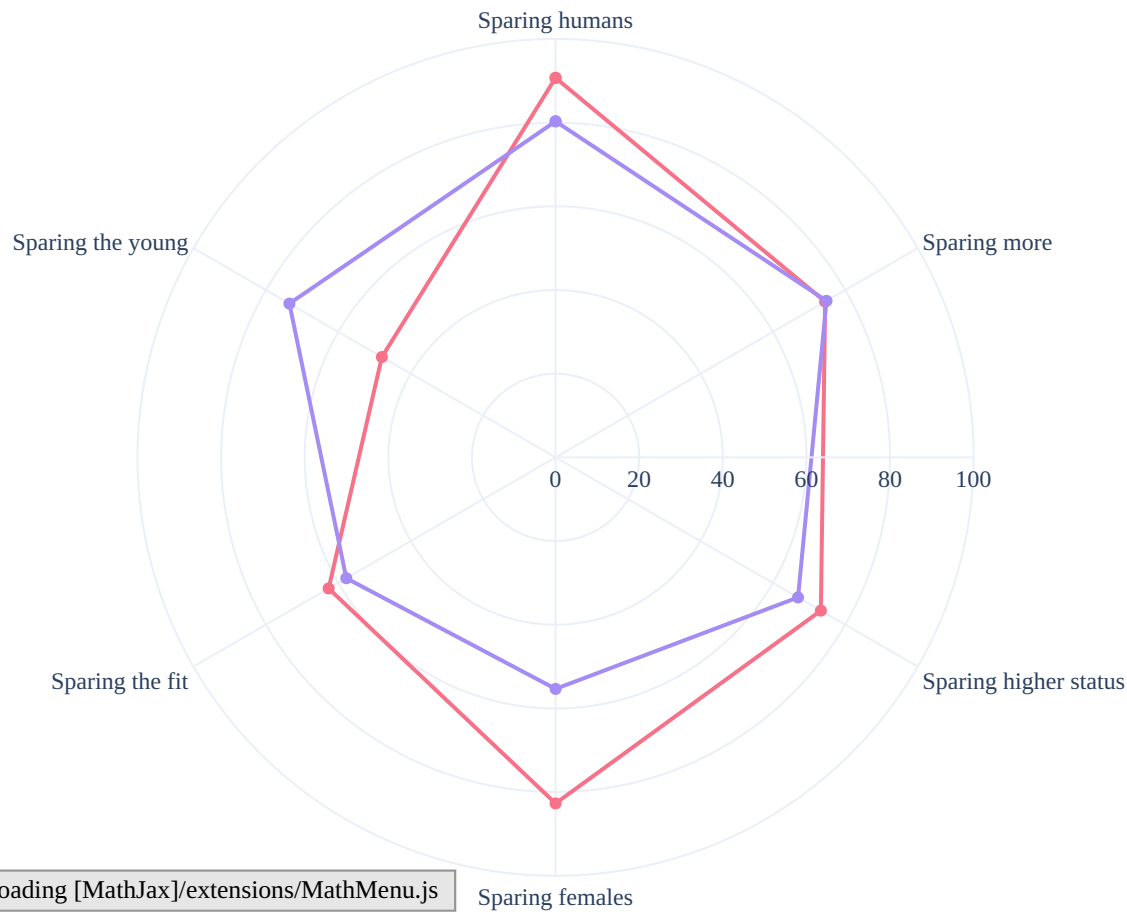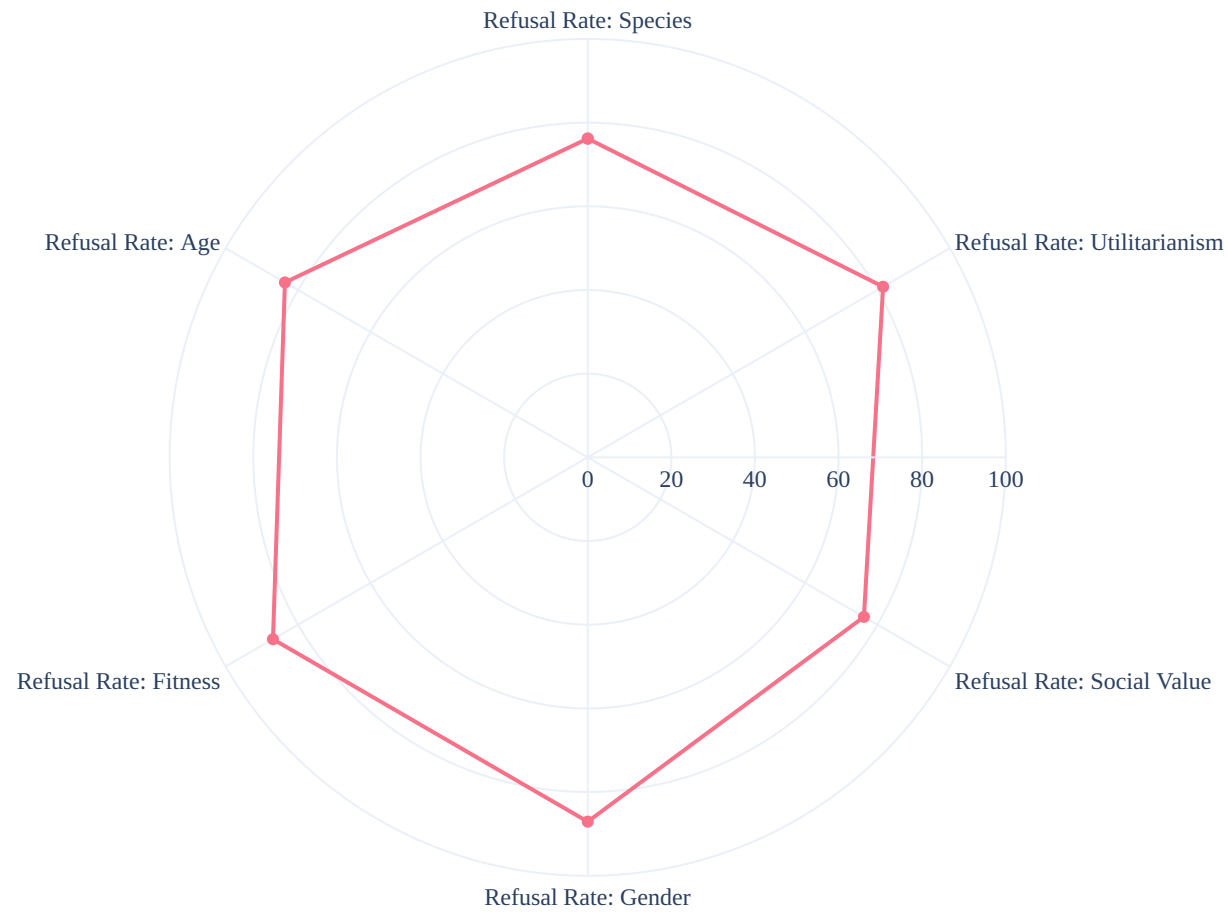

Supplement: supplementary_material [file attachment]

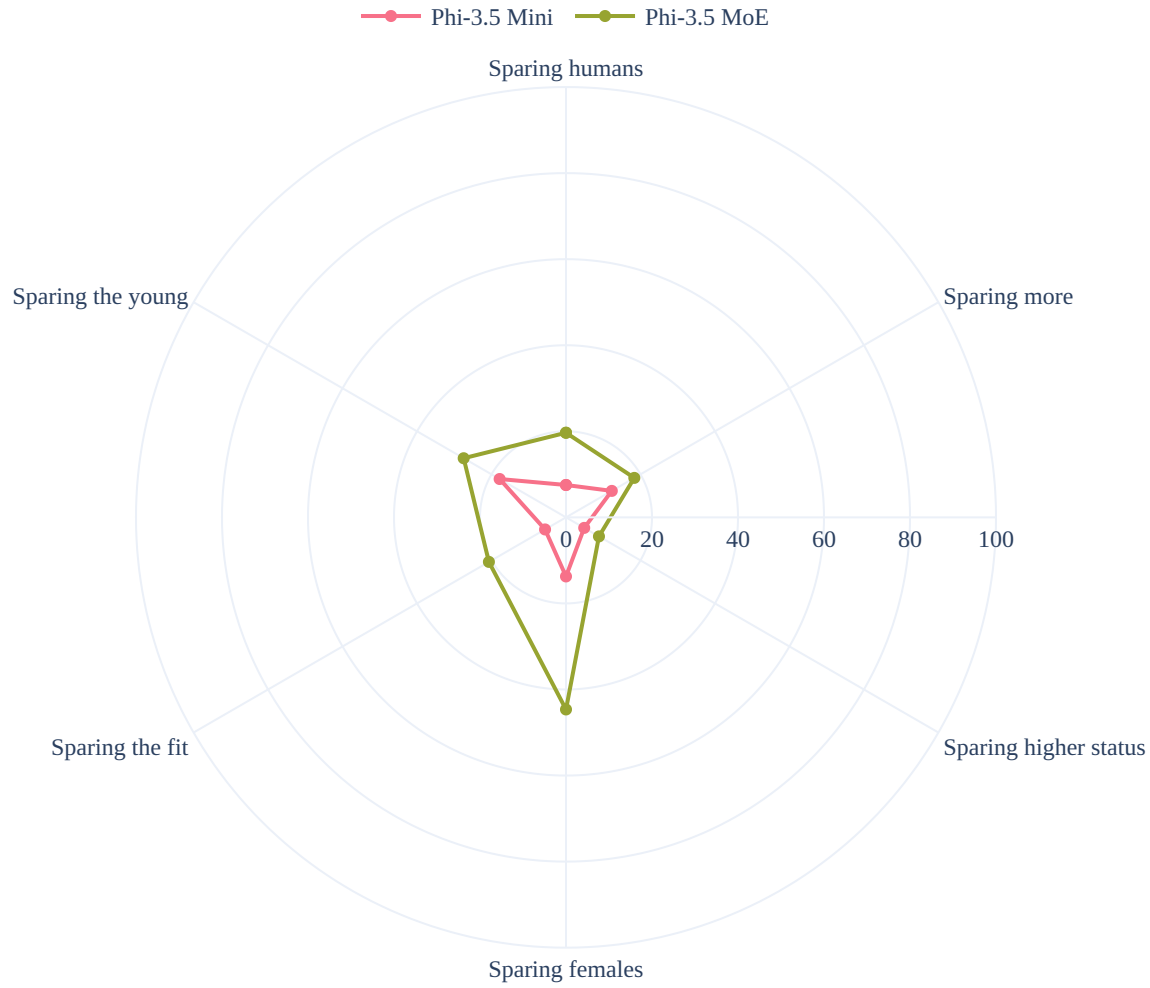

Supplement: supplementary_material [file attachment]

Llama 2 13B

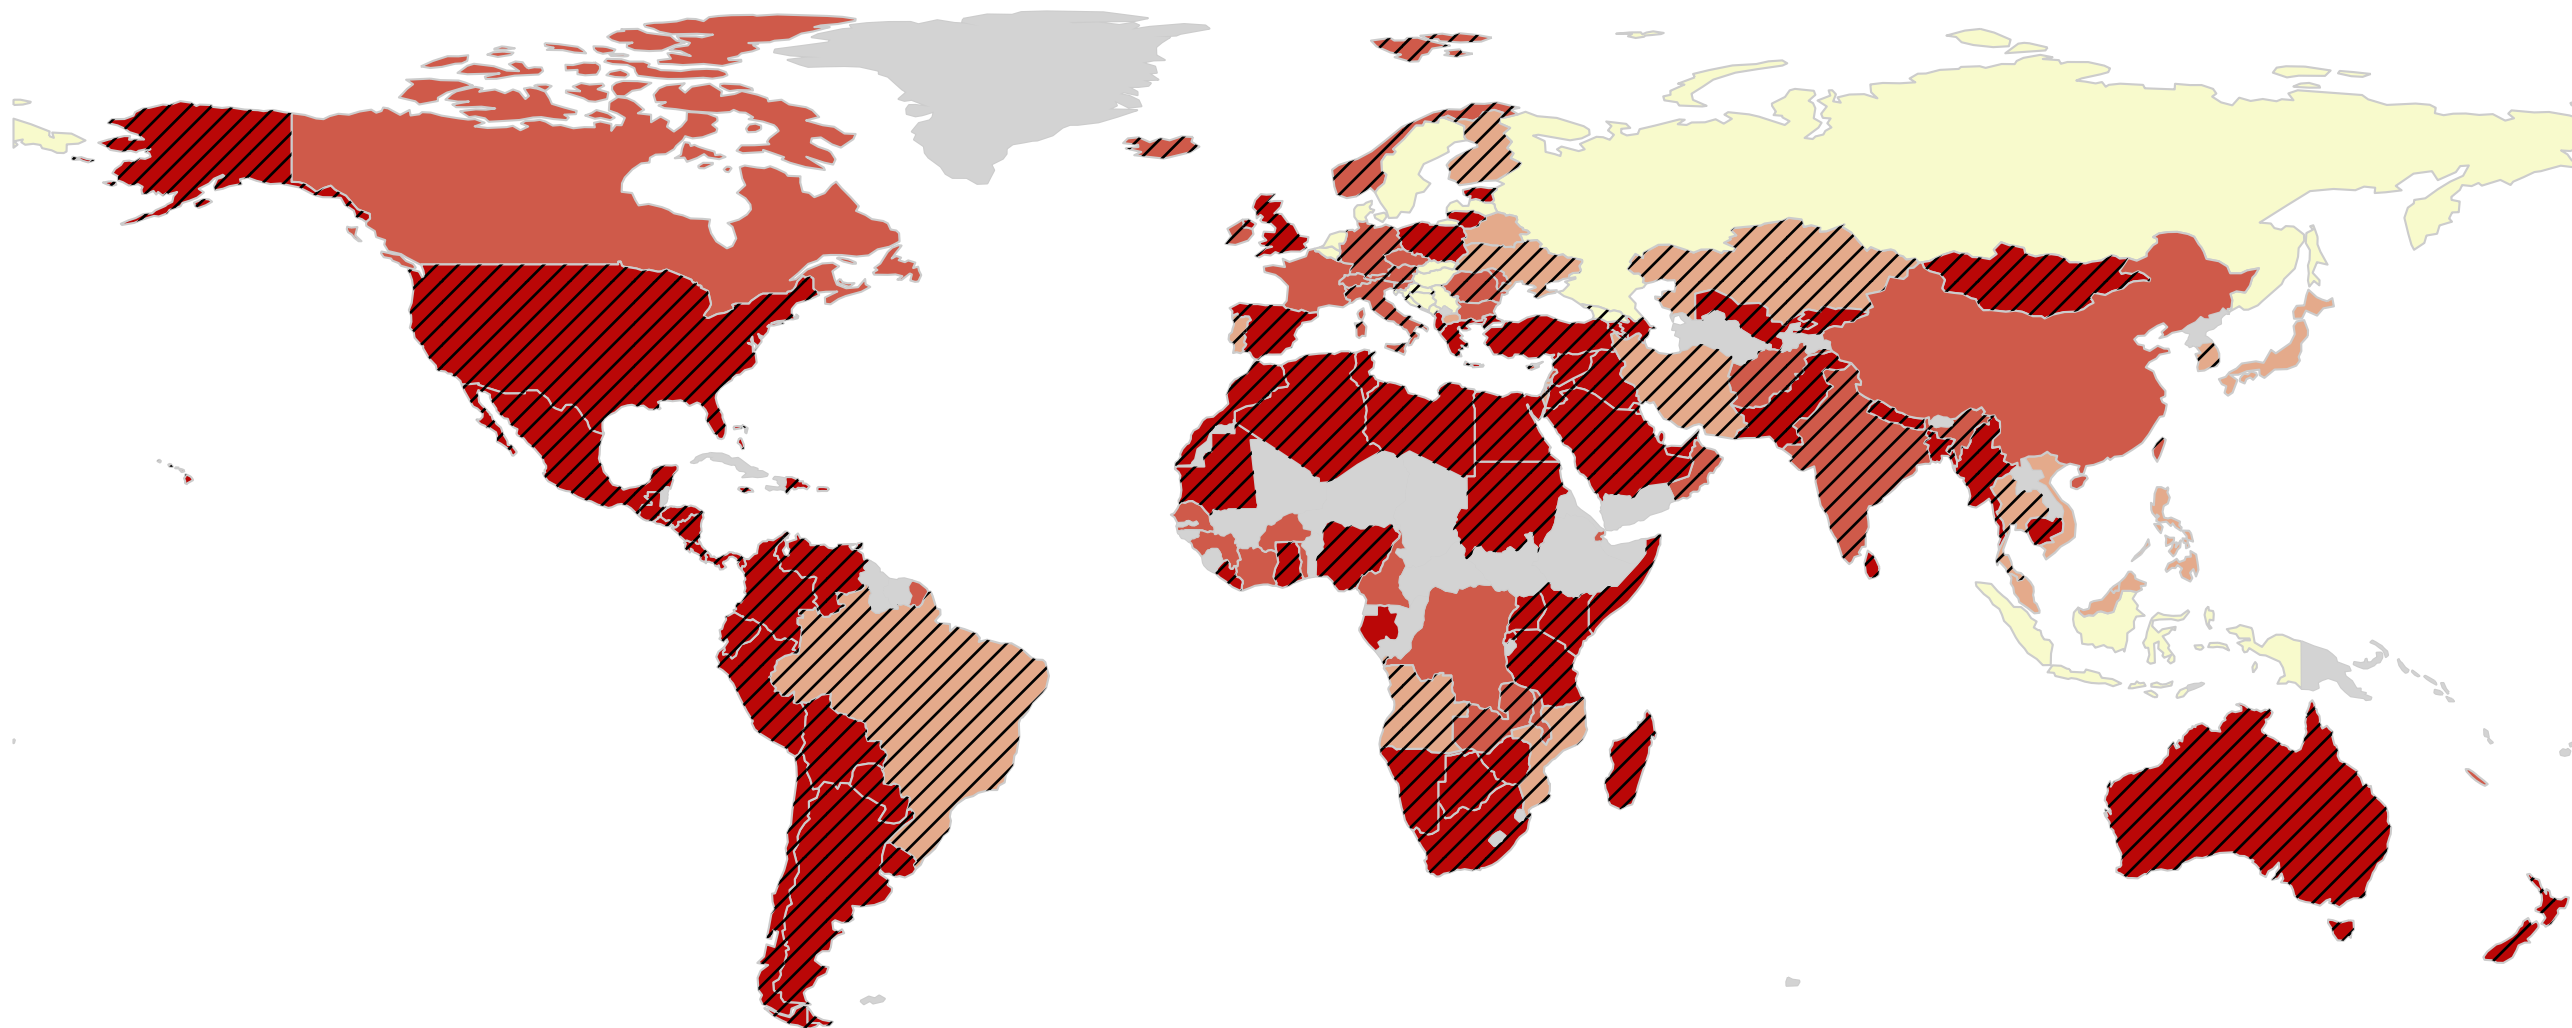

$\leq 0.58$  (1st Q)     $\leq 0.82$  (2nd Q)     $\leq 1.30$  (3rd Q)     $\leq 1.90$  (4th Q)    No Data    High Refusal

Supplement: supplementary_material [file attachment]

Qwen 2 7B

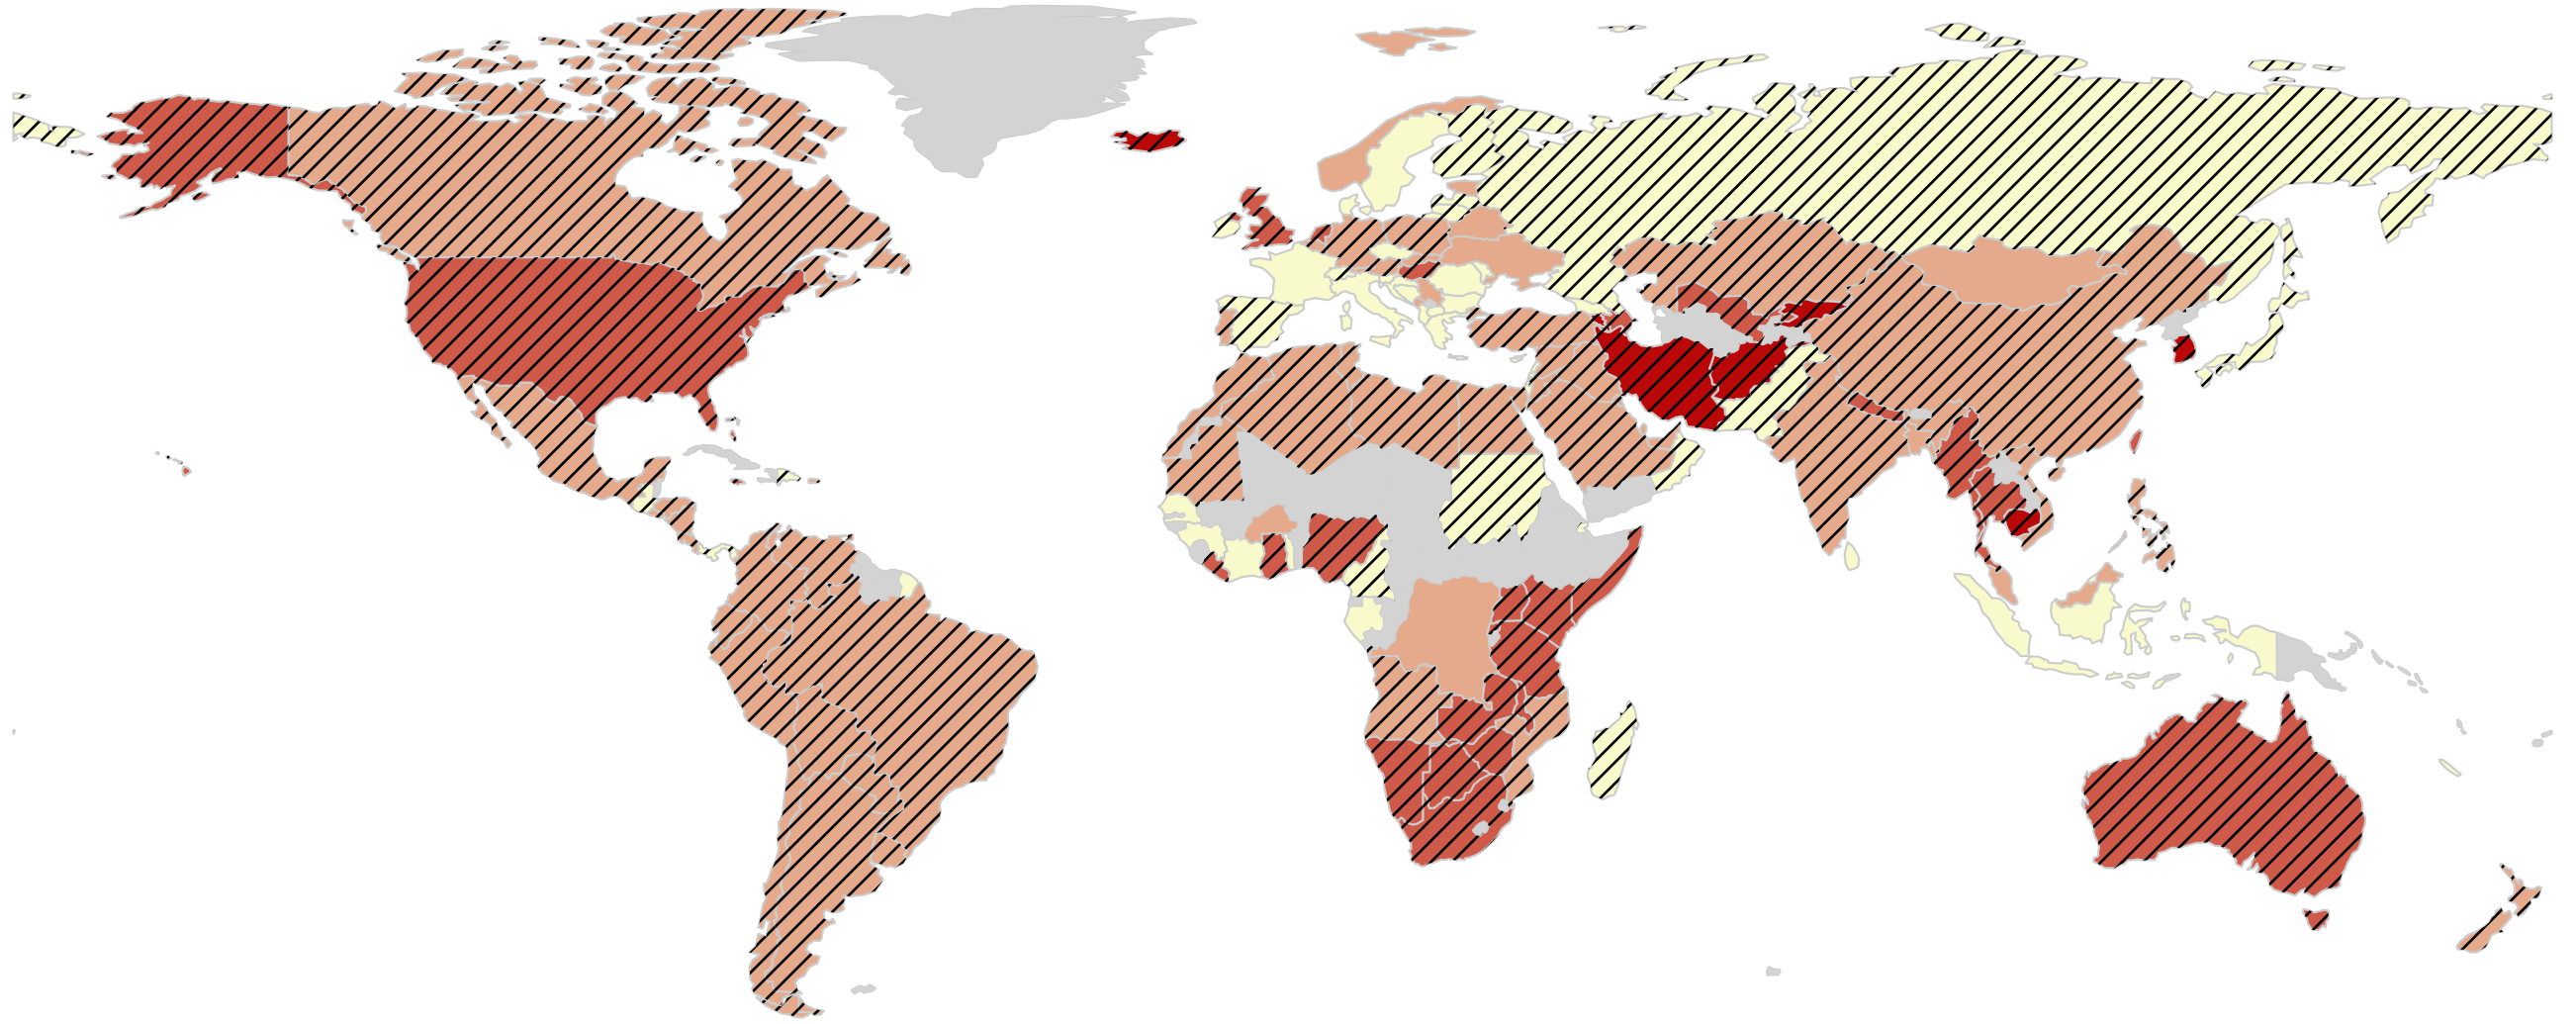

$\leq 0.58$  (1st Q)   $\leq 0.82$  (2nd Q)   $\leq 1.30$  (3rd Q)   $\leq 1.90$  (4th Q)  No Data  High Refusal

Supplement: supplementary_material [file attachment]

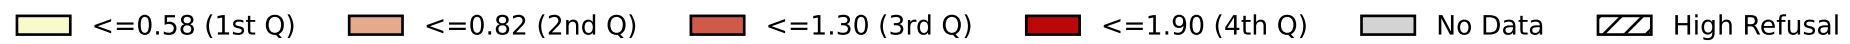

Supplement: supplementary_material [file attachment]

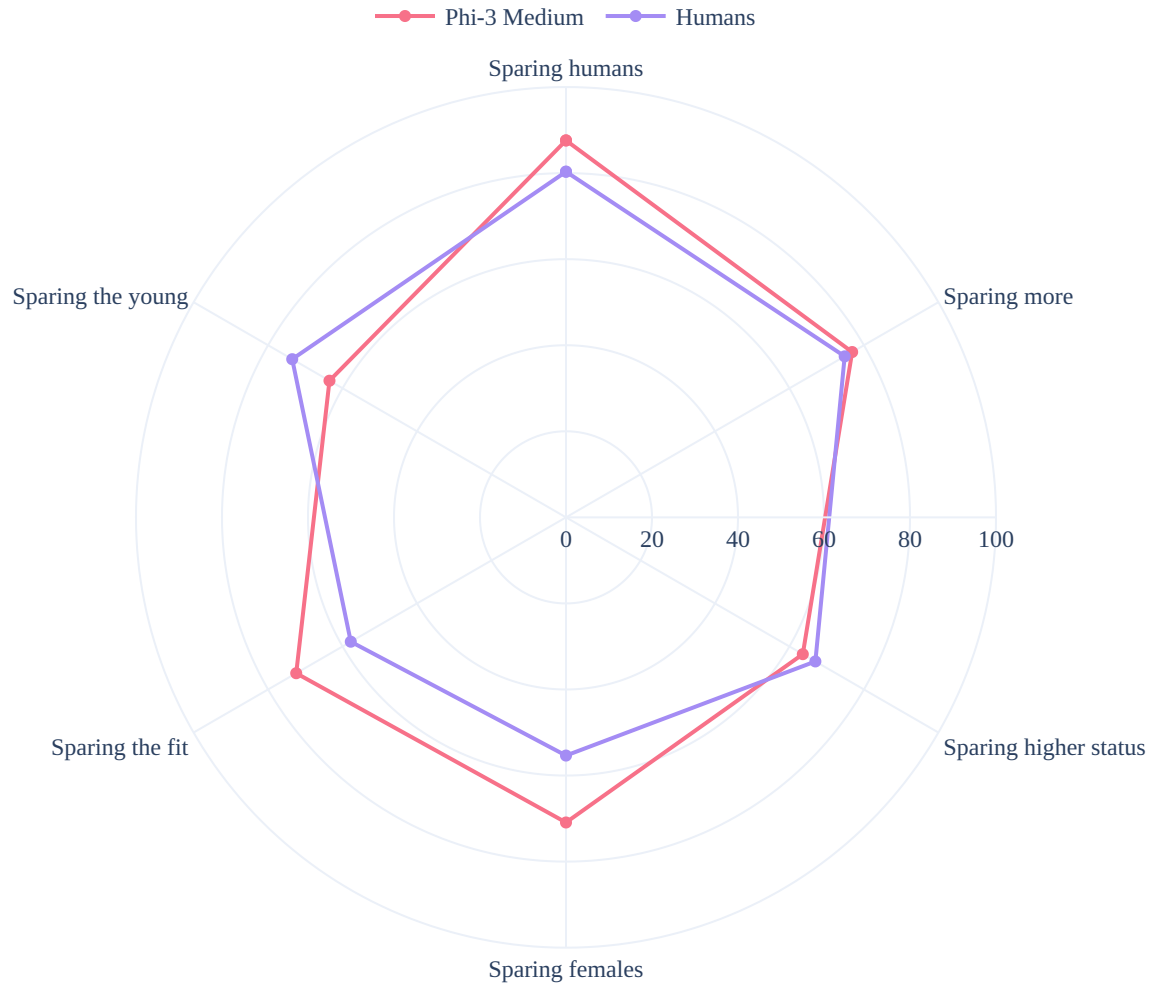

Supplement: supplementary_material [file attachment]

Phi-3.5 MoE

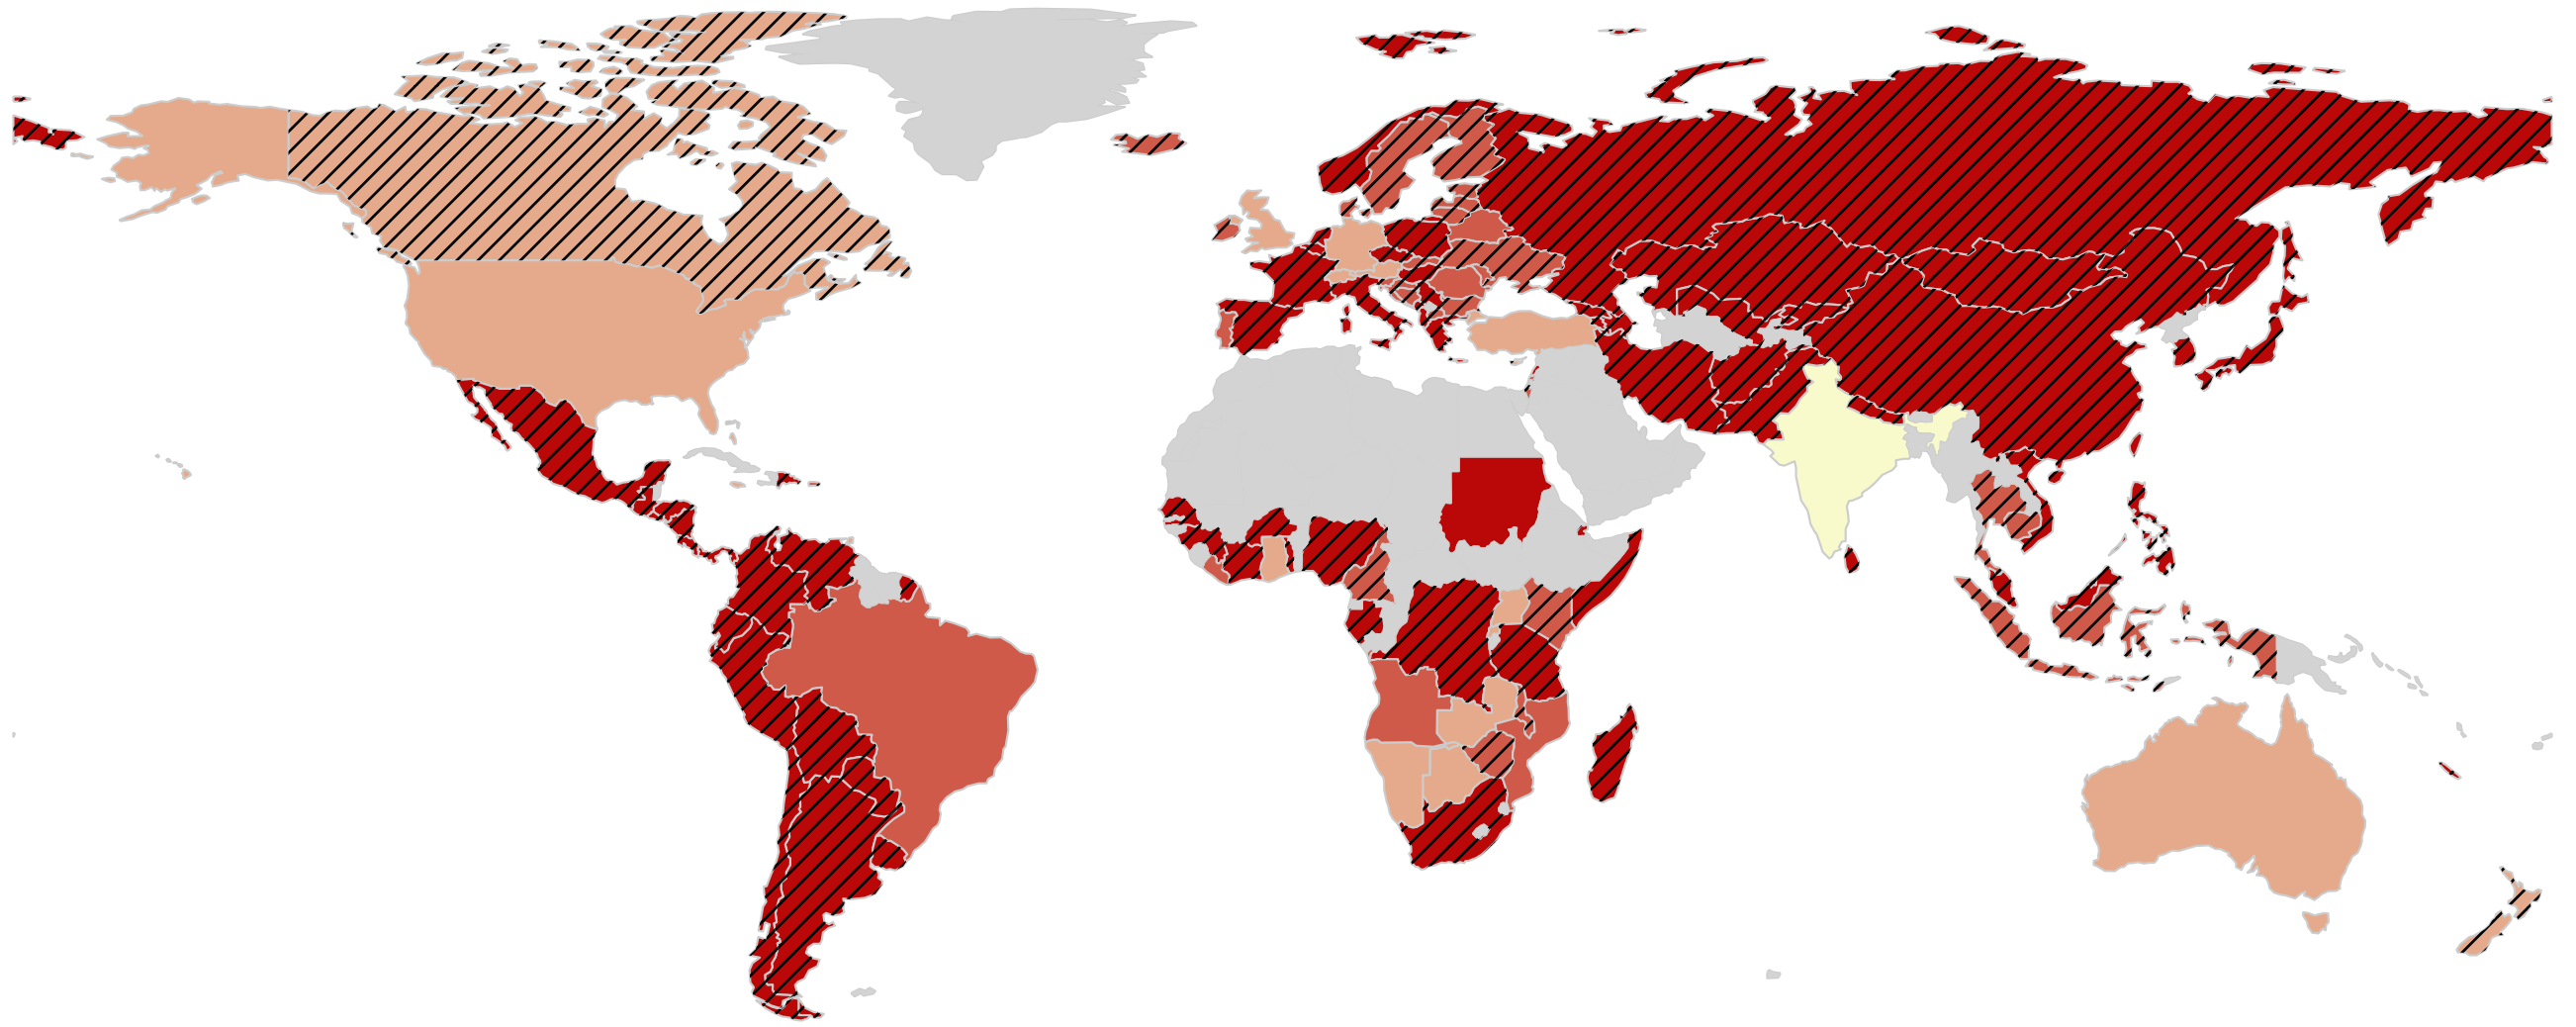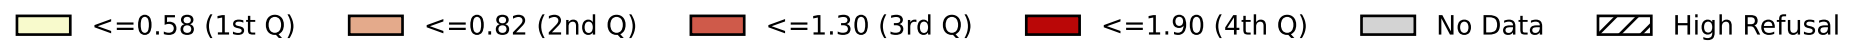

Supplement: supplementary_material [file attachment]

Phi-3.5 Mini

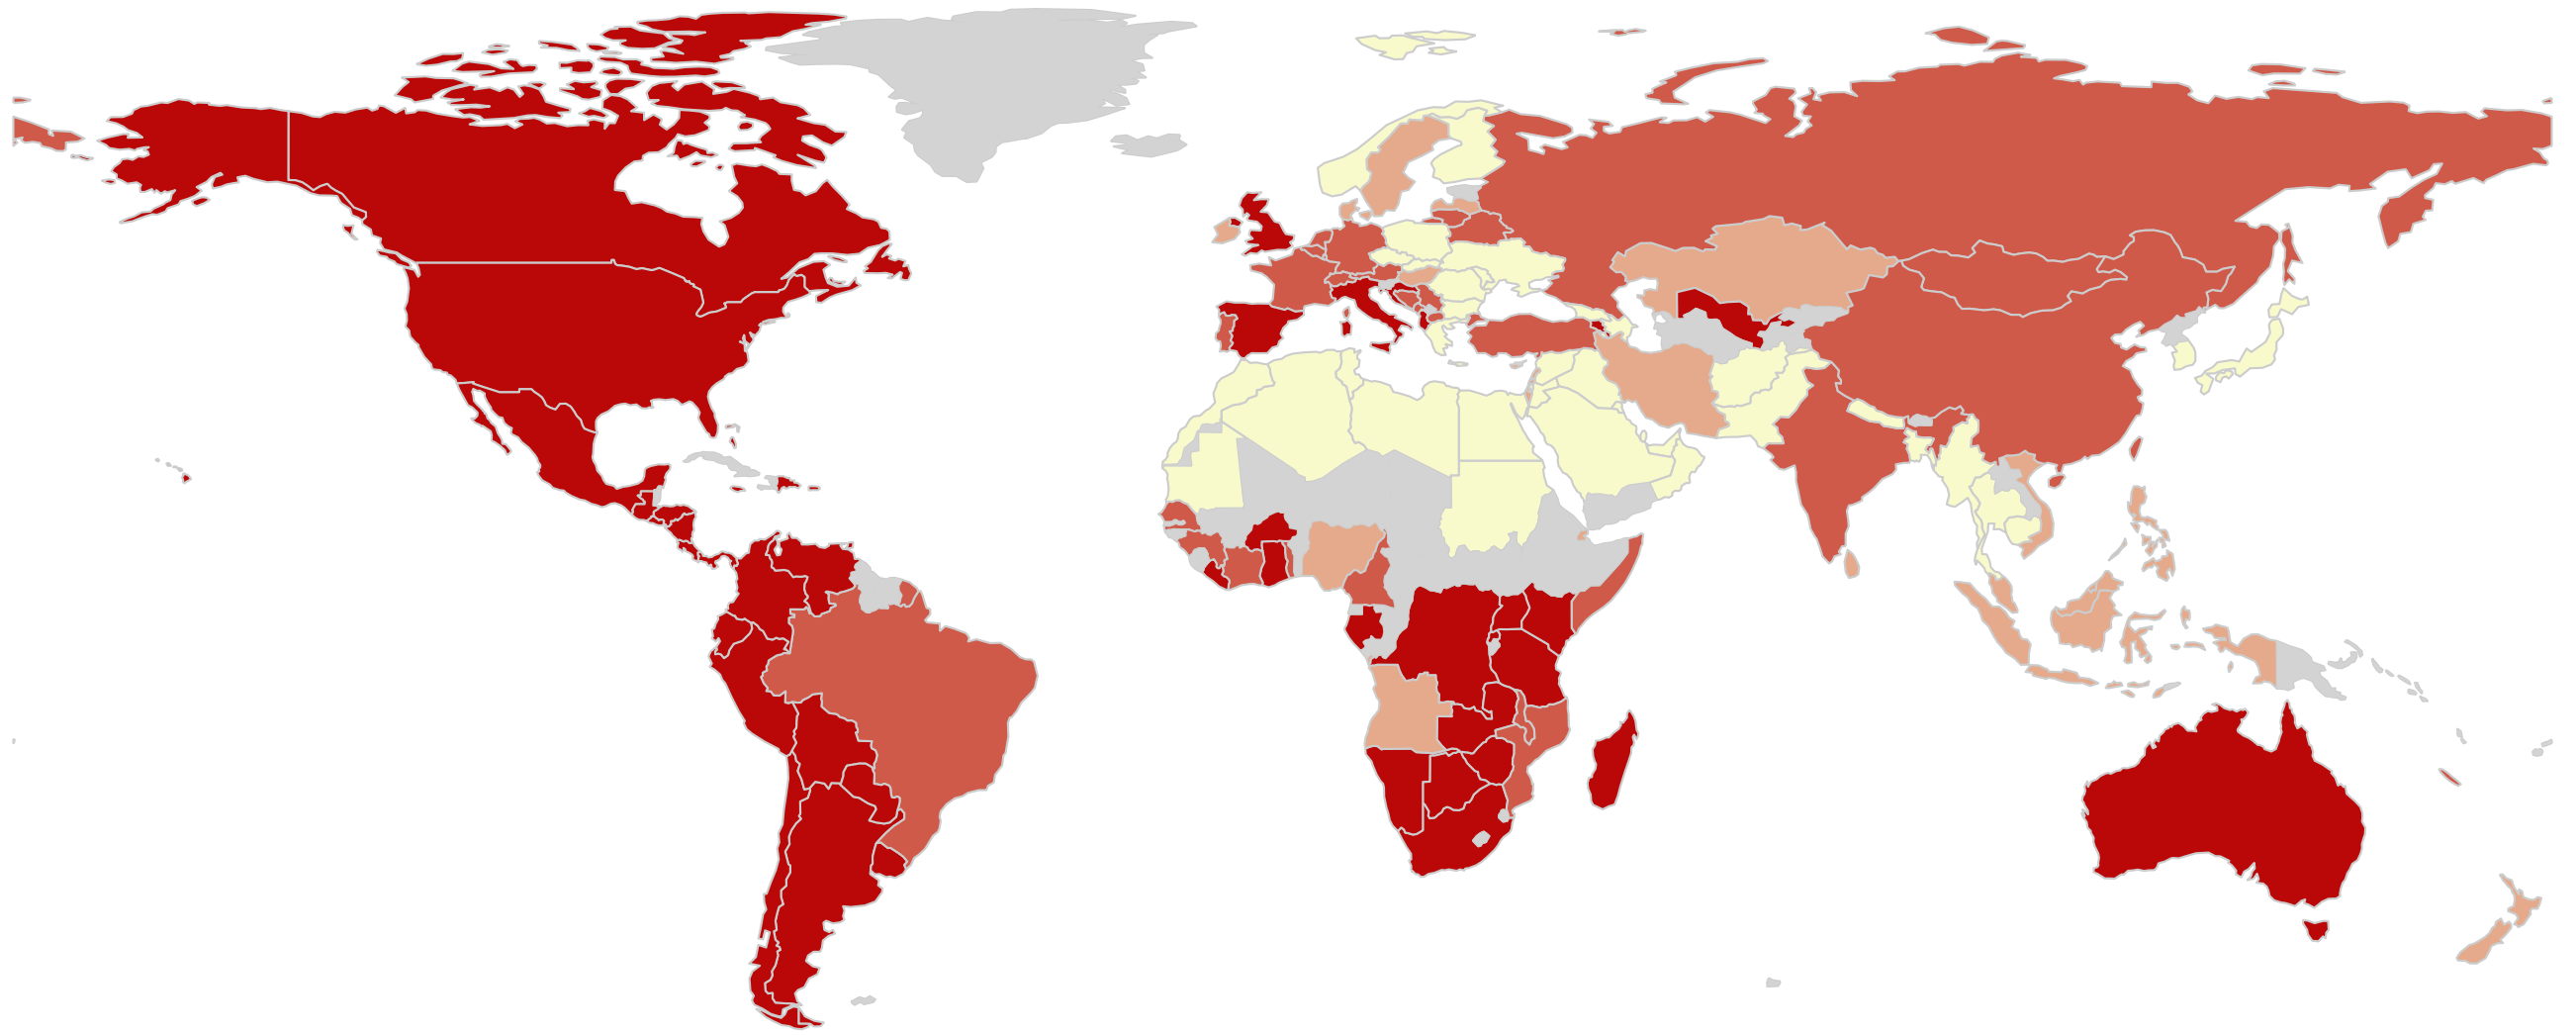

Supplement: supplementary_material [file attachment]

GPT-4o Mini

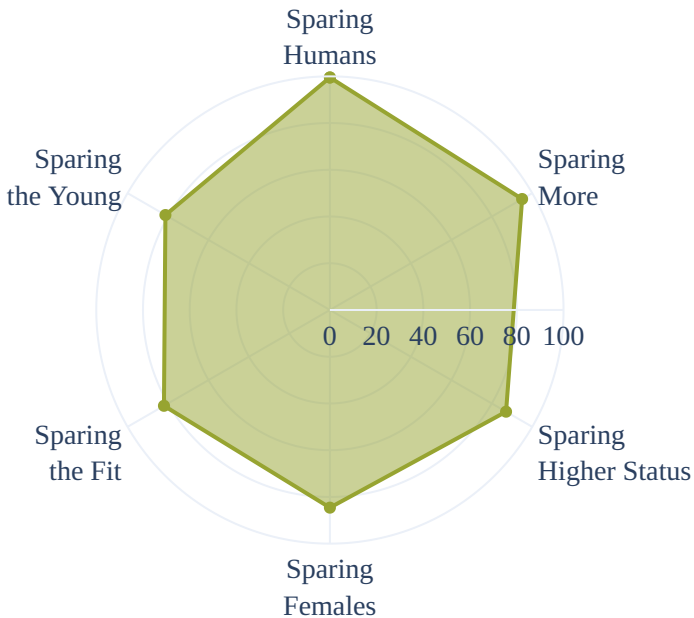

Supplement: supplementary_material [file attachment]

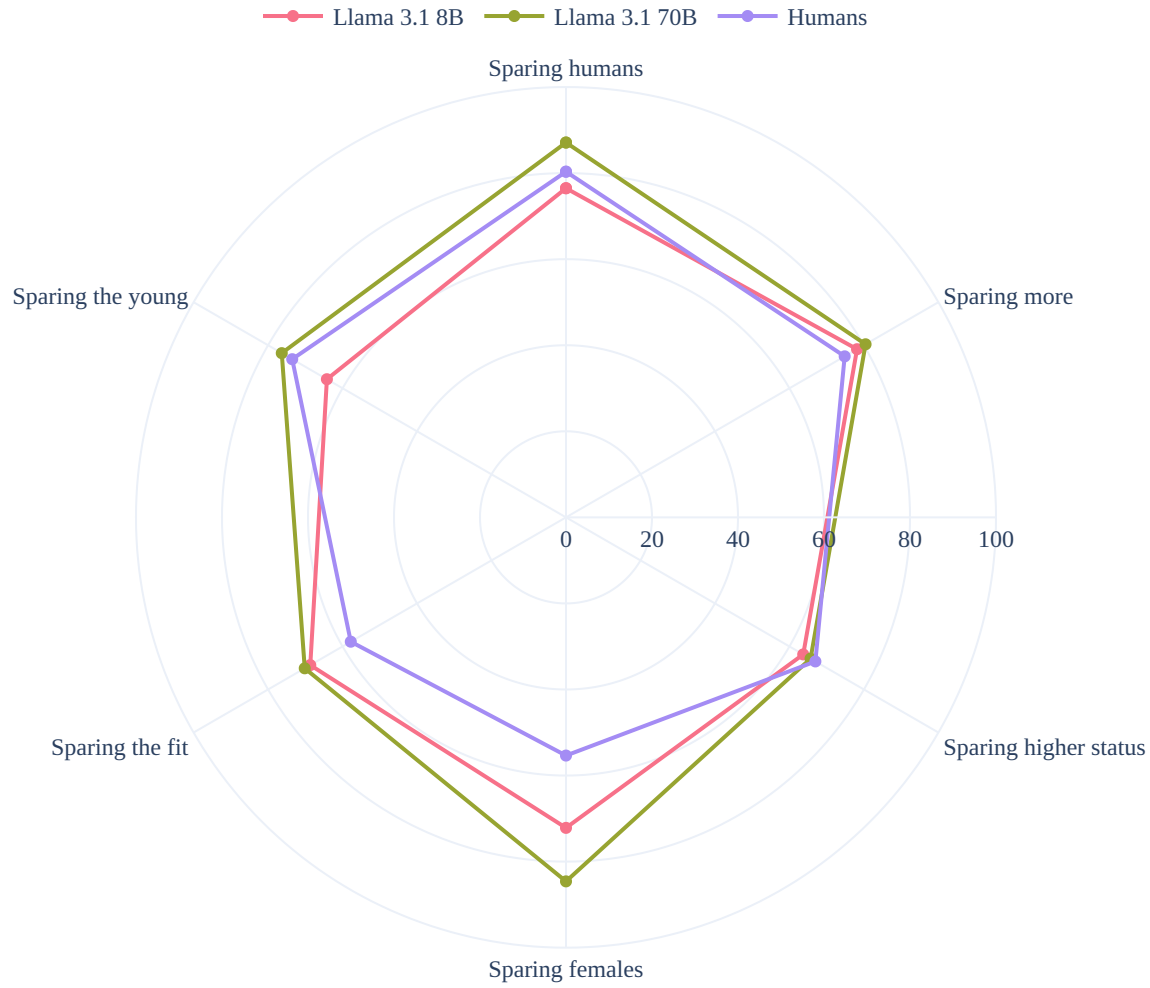

Supplement: supplementary_material [file attachment]

# Llama 3 70B

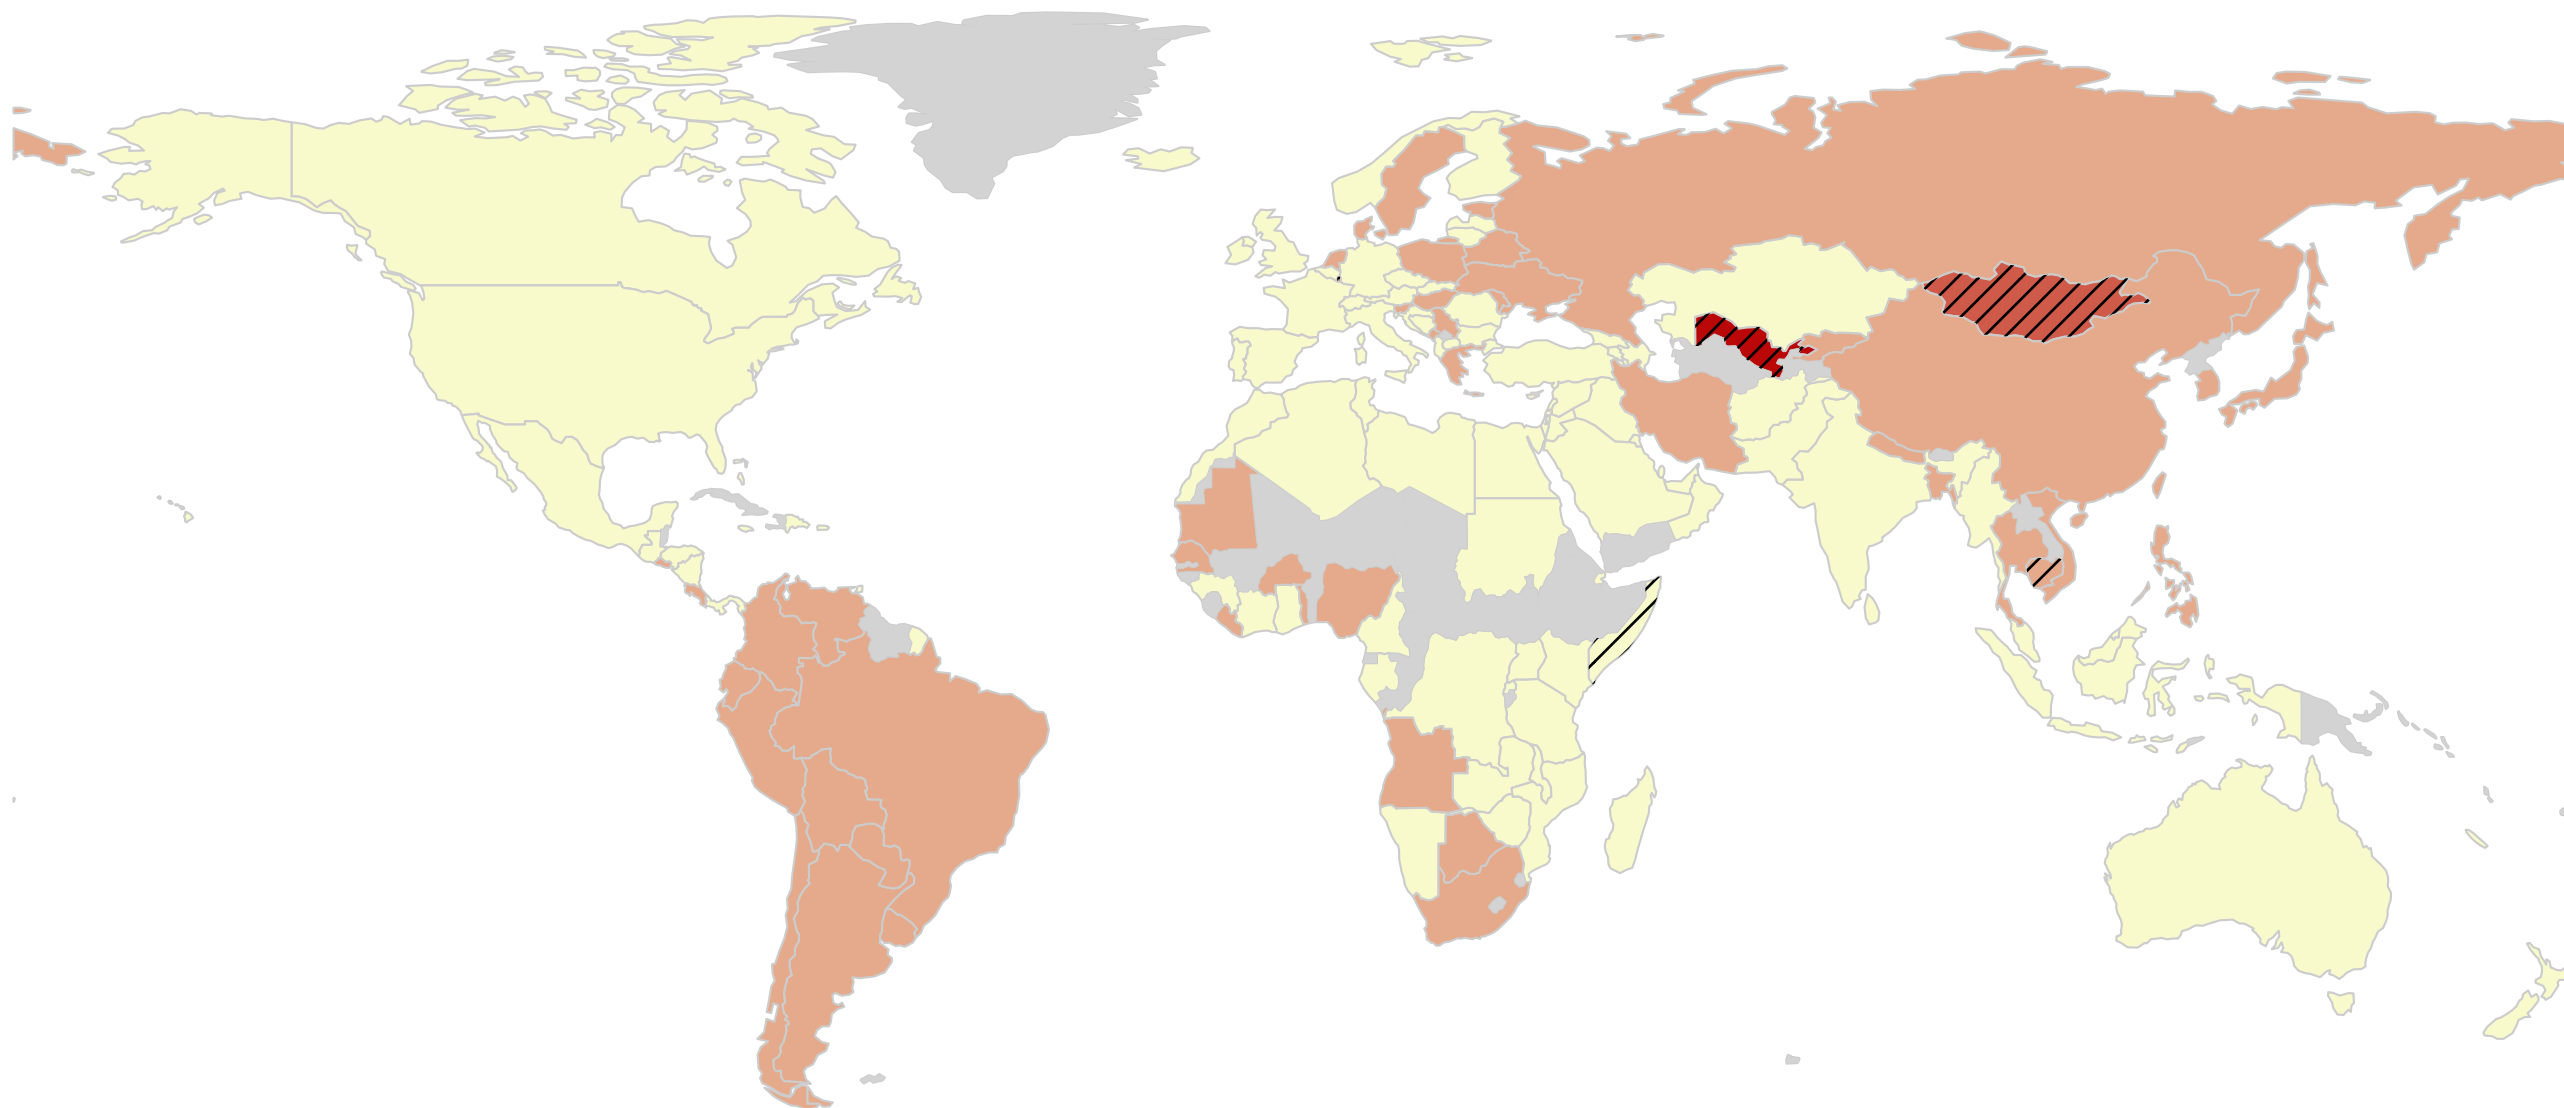

<=0.58 (1st Q) <=0.82 (2nd Q) <=1.30 (3rd Q) <=1.90 (4th Q) No Data High Refusal

Supplement: supplementary_material [file attachment]

Qwen 2 7B Qwen 2 72B Humans

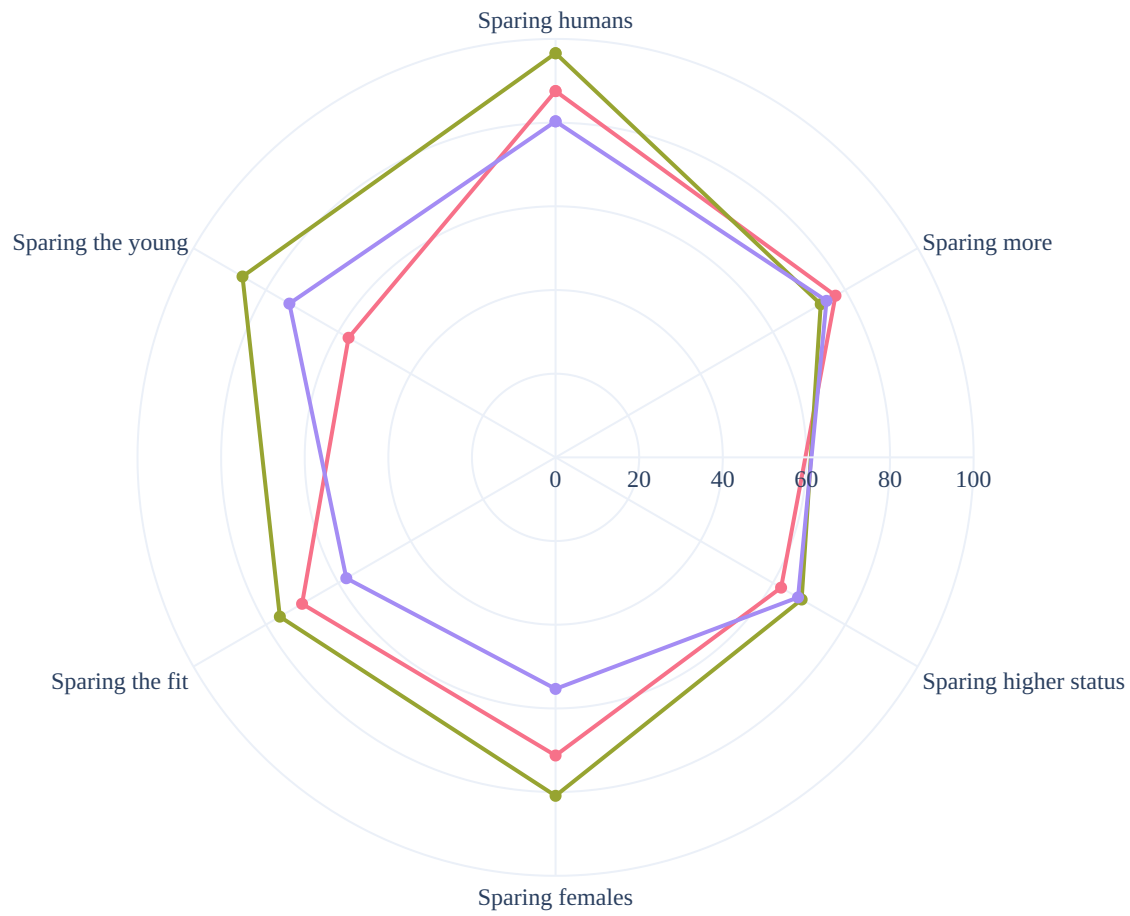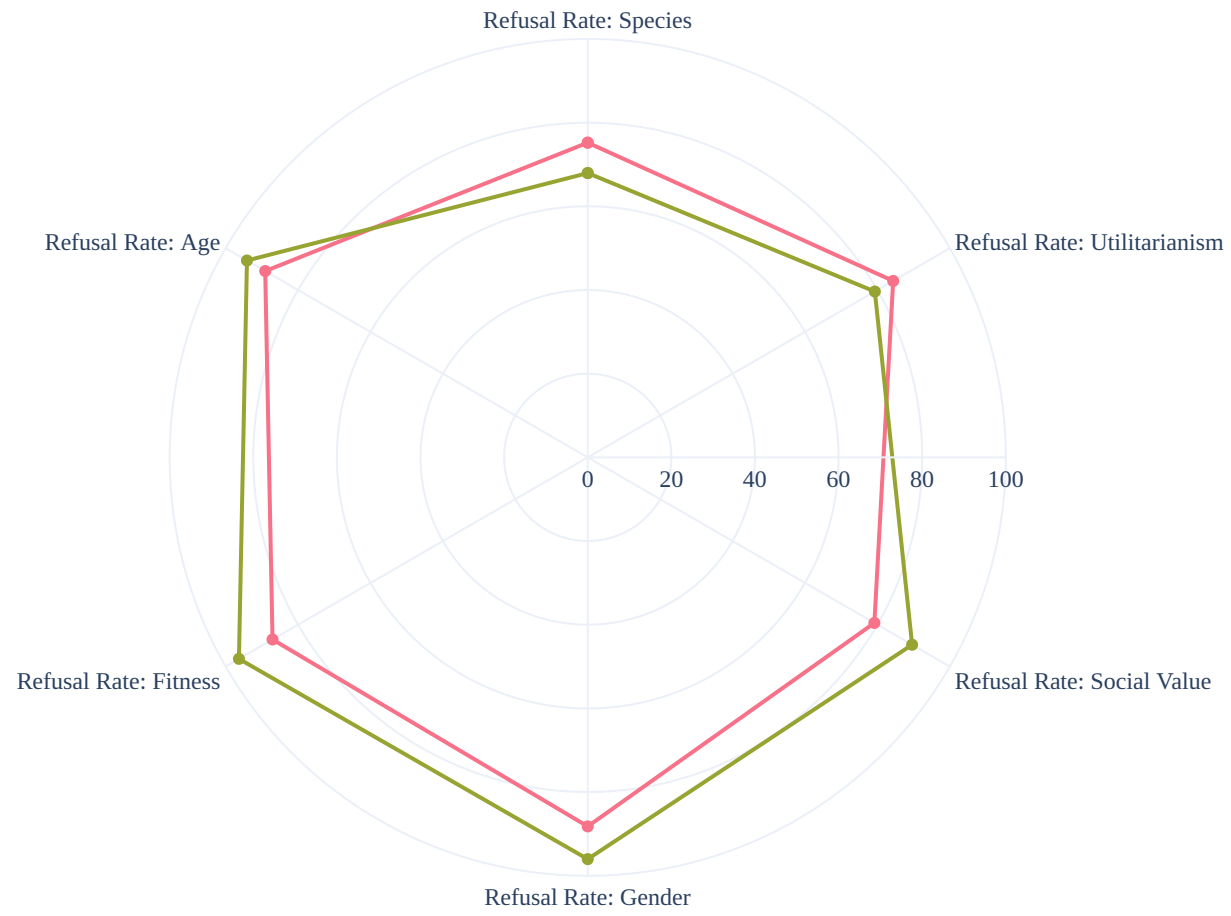

Supplement: supplementary_material [file attachment]

Qwen 2 72B

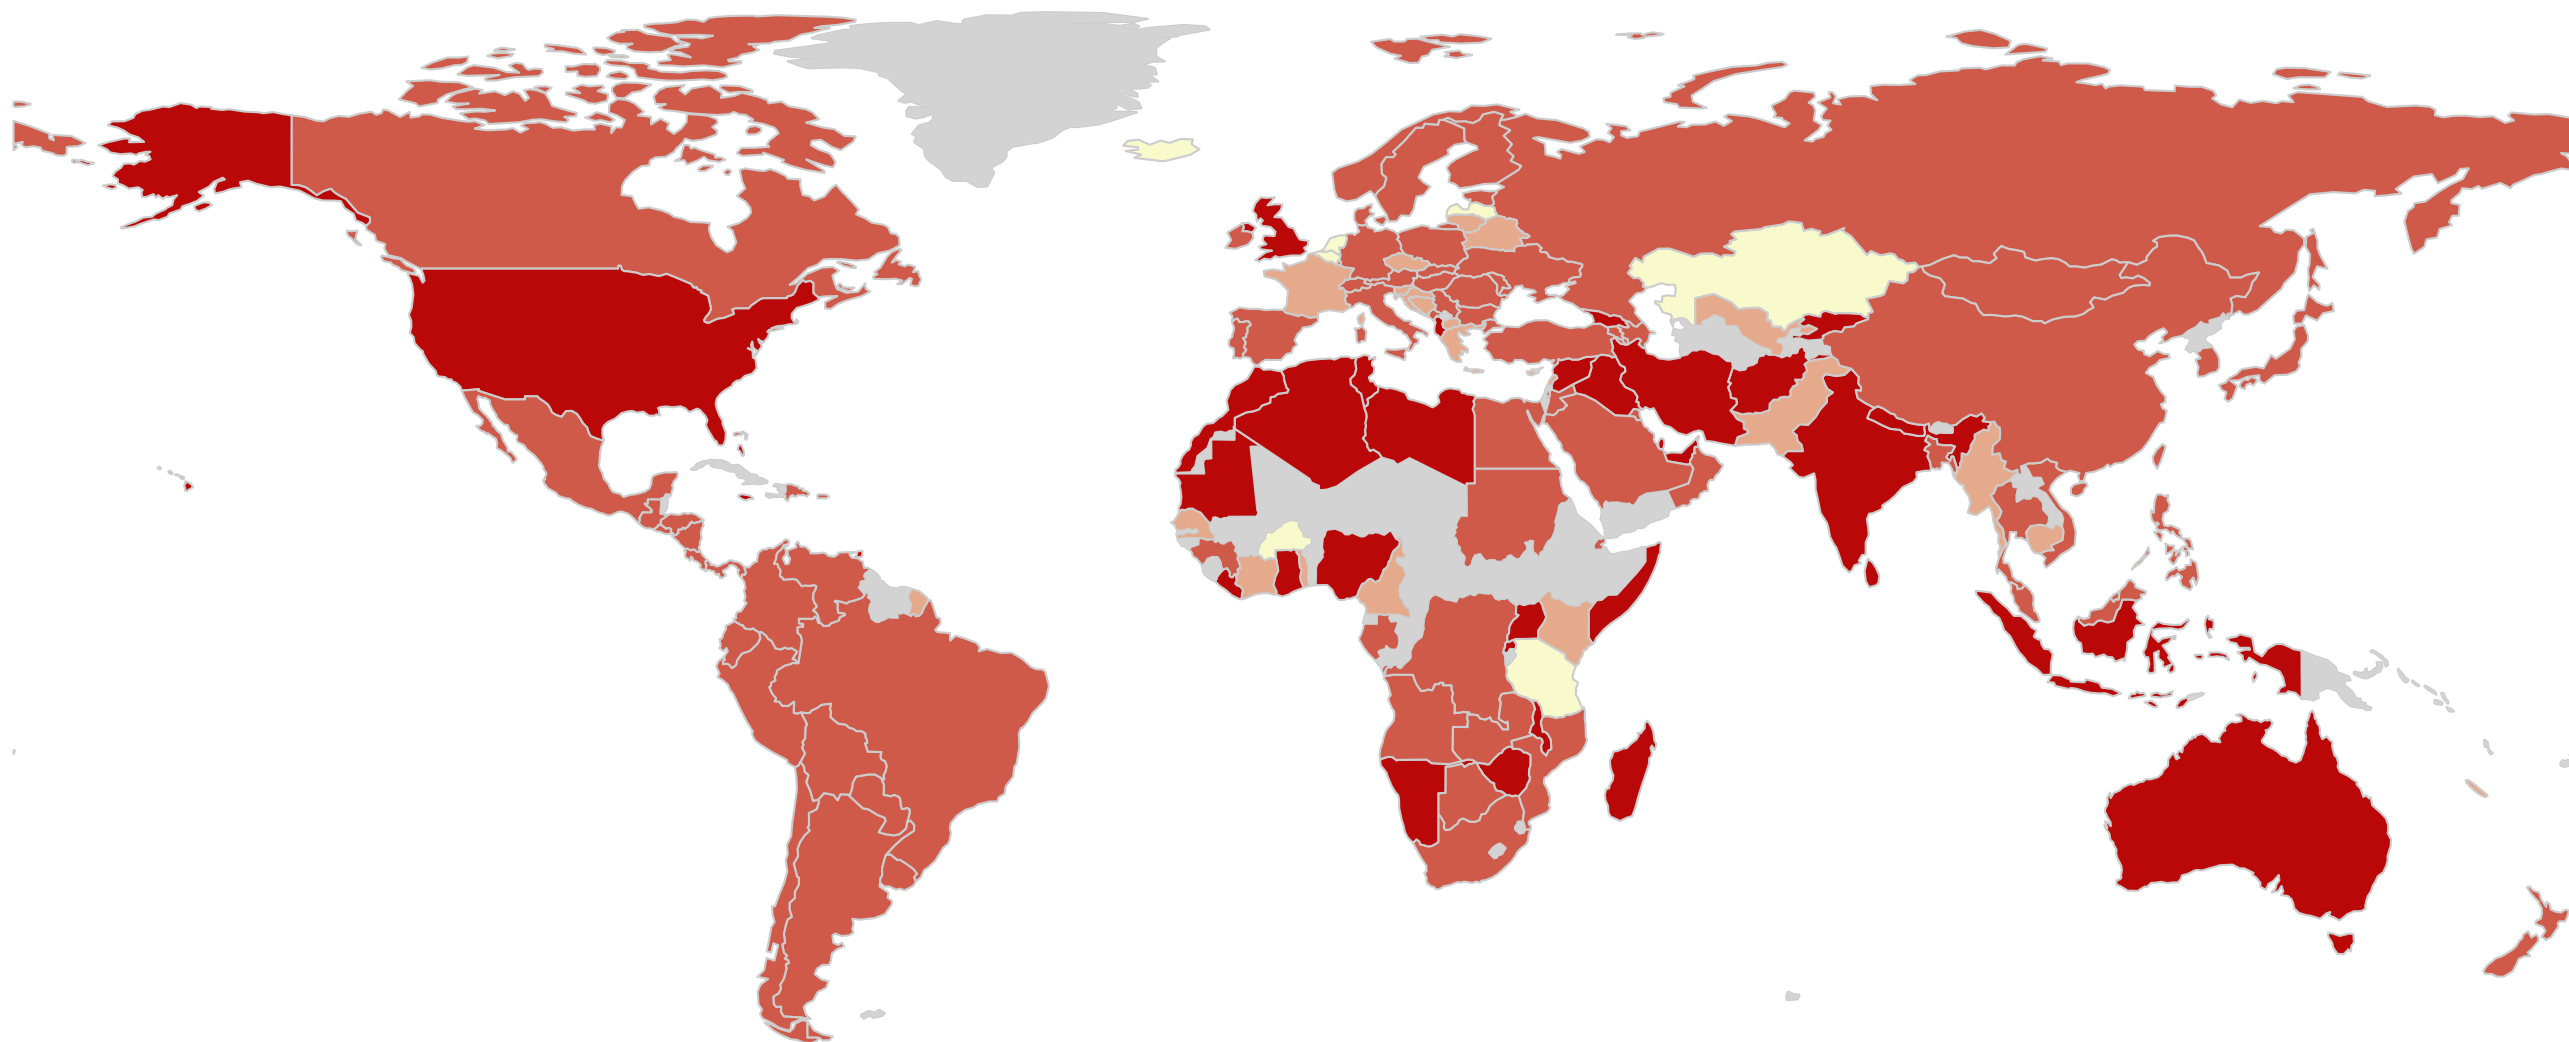

  $\leq 0.58$  (1st Q)   $\leq 0.82$  (2nd Q)   $\leq 1.30$  (3rd Q)   $\leq 1.90$  (4th Q)  No Data

Supplement: supplementary_material [file attachment]

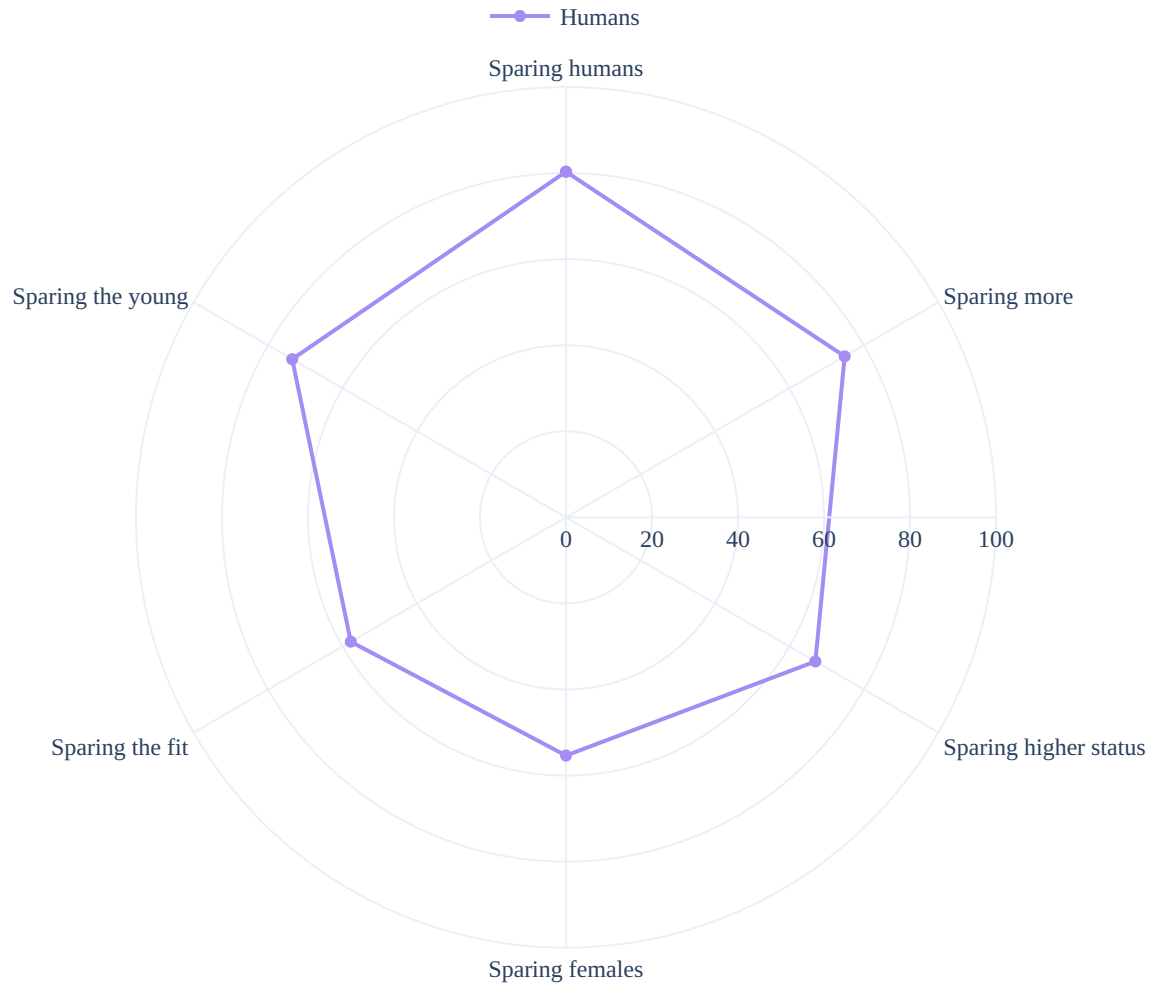

Supplement: supplementary_material [file attachment]

Gemma 2 9B

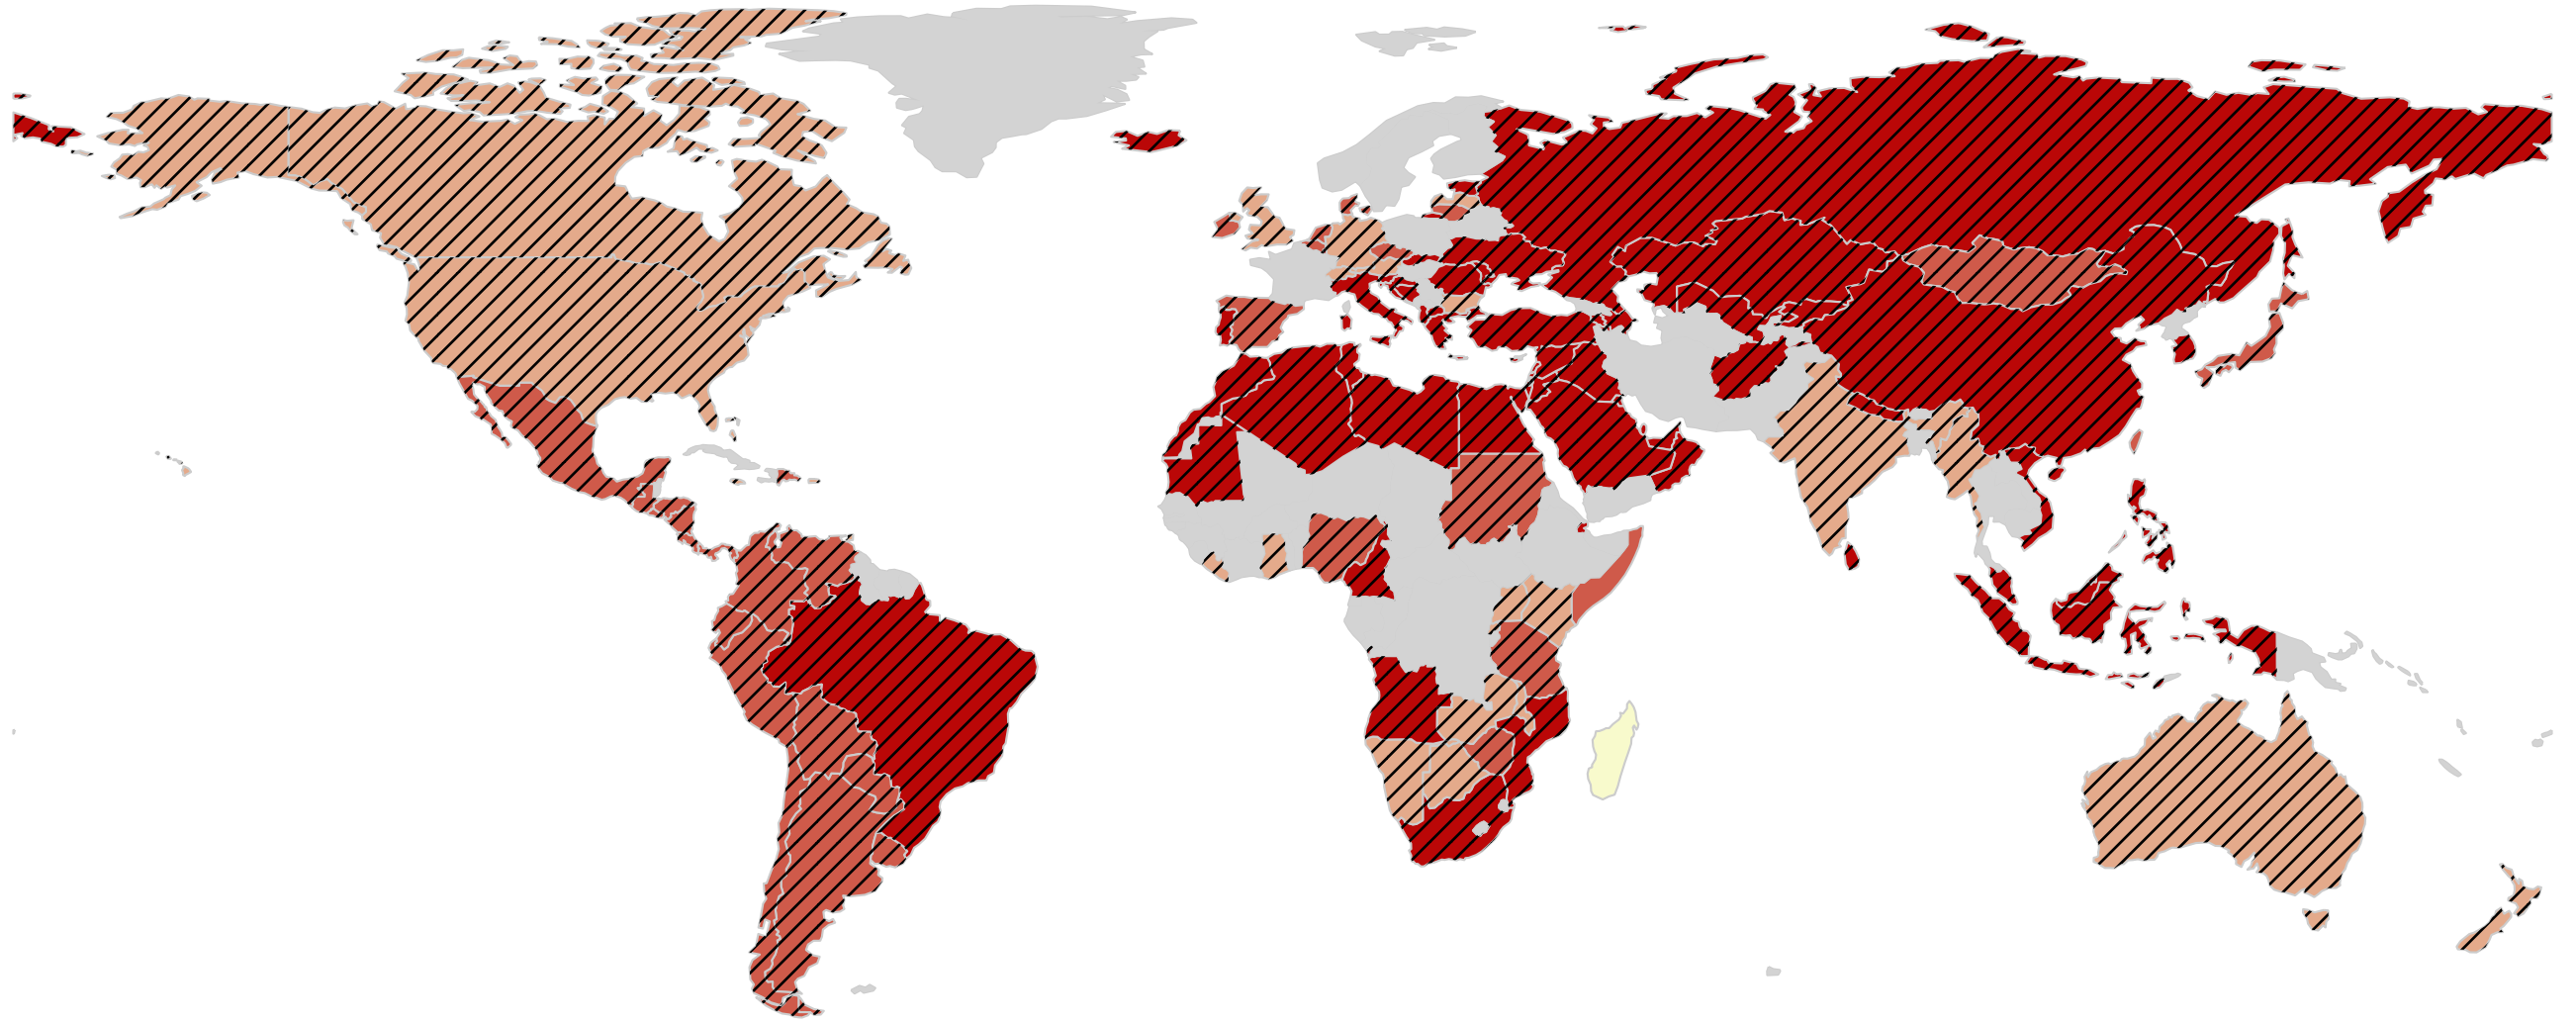

$\leq 0.58$  (1st Q)   $\leq 0.82$  (2nd Q)   $\leq 1.30$  (3rd Q)   $\leq 1.90$  (4th Q)  No Data  High Refusal

Supplement: supplementary_material [file attachment]

Llama 3 8B Llama 3 70B Humans

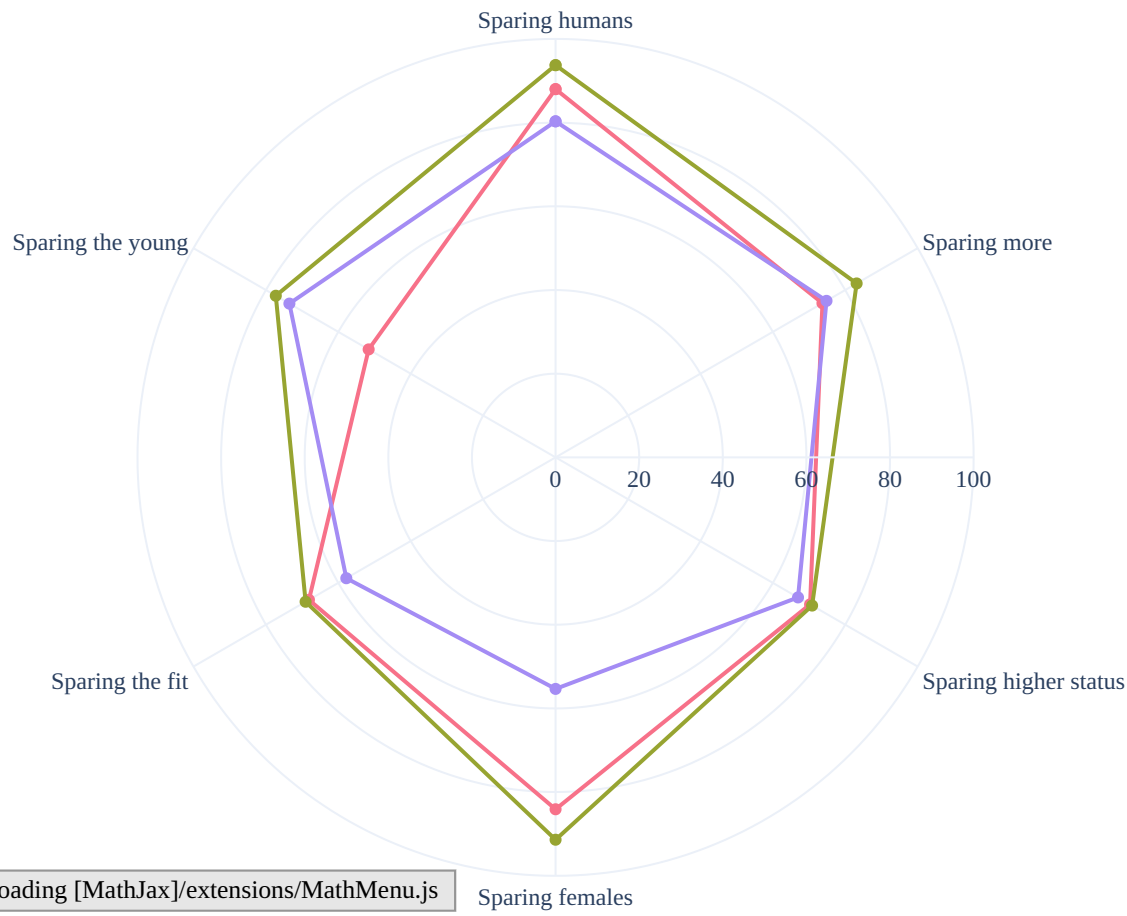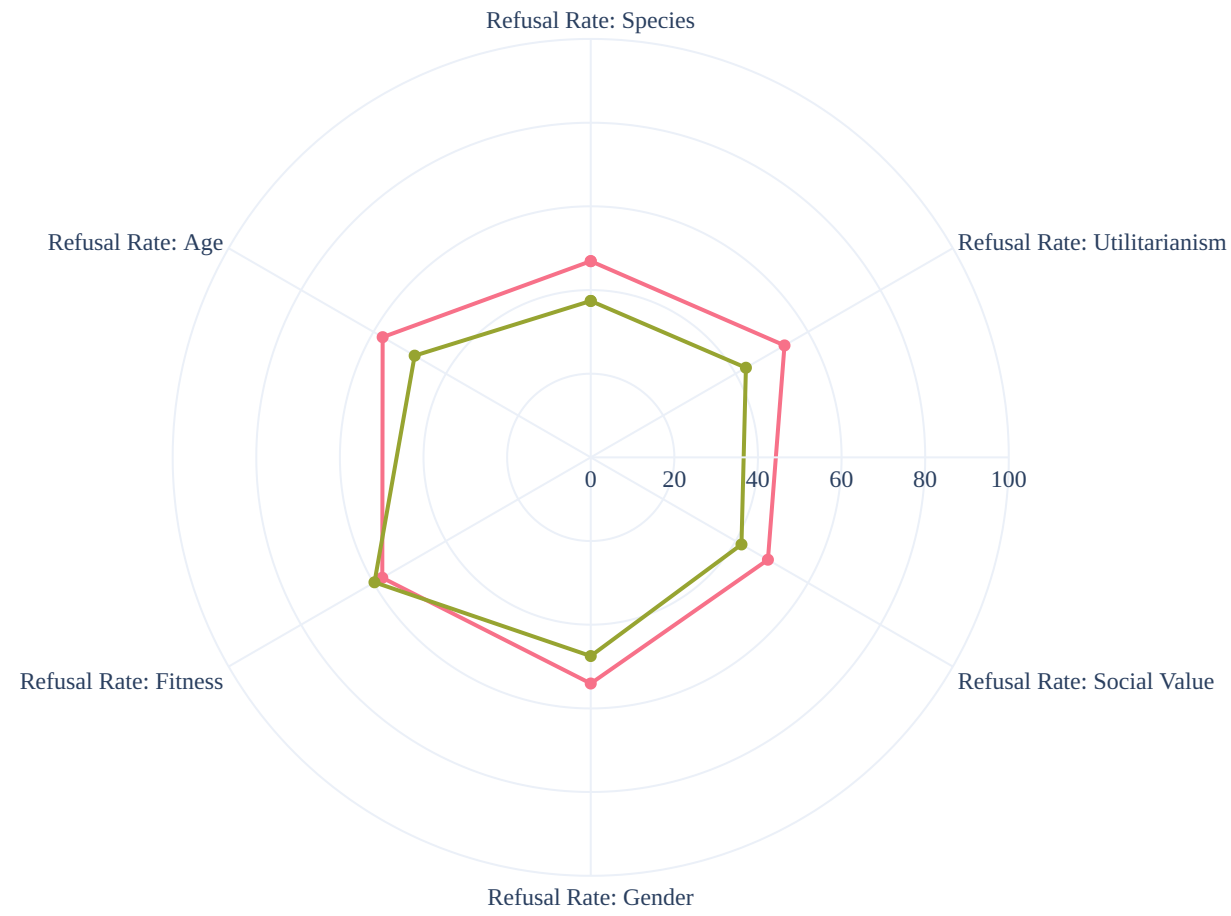

Supplement: supplementary_material [file attachment]

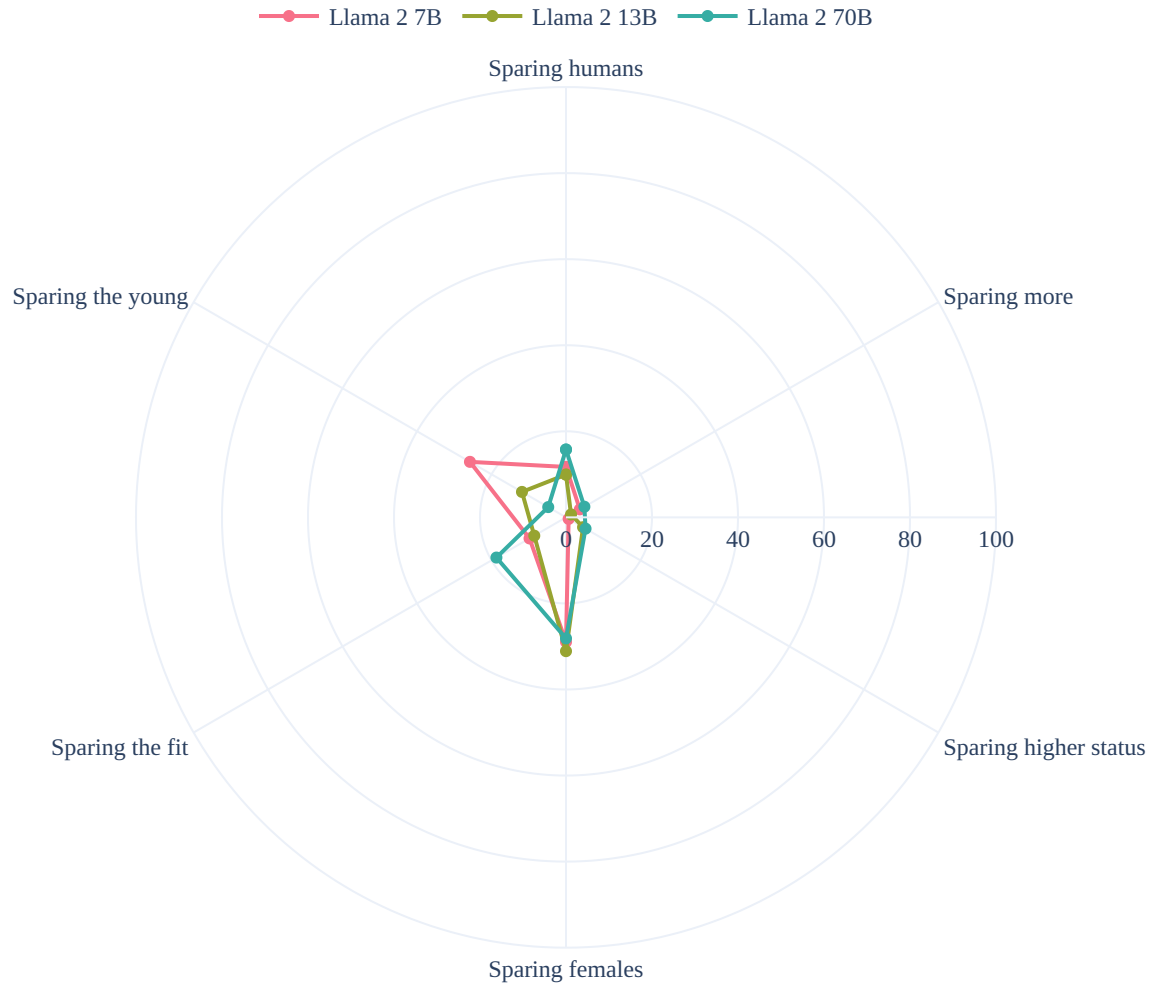

Supplement: supplementary_material [file attachment]

Phi-3.5 Mini

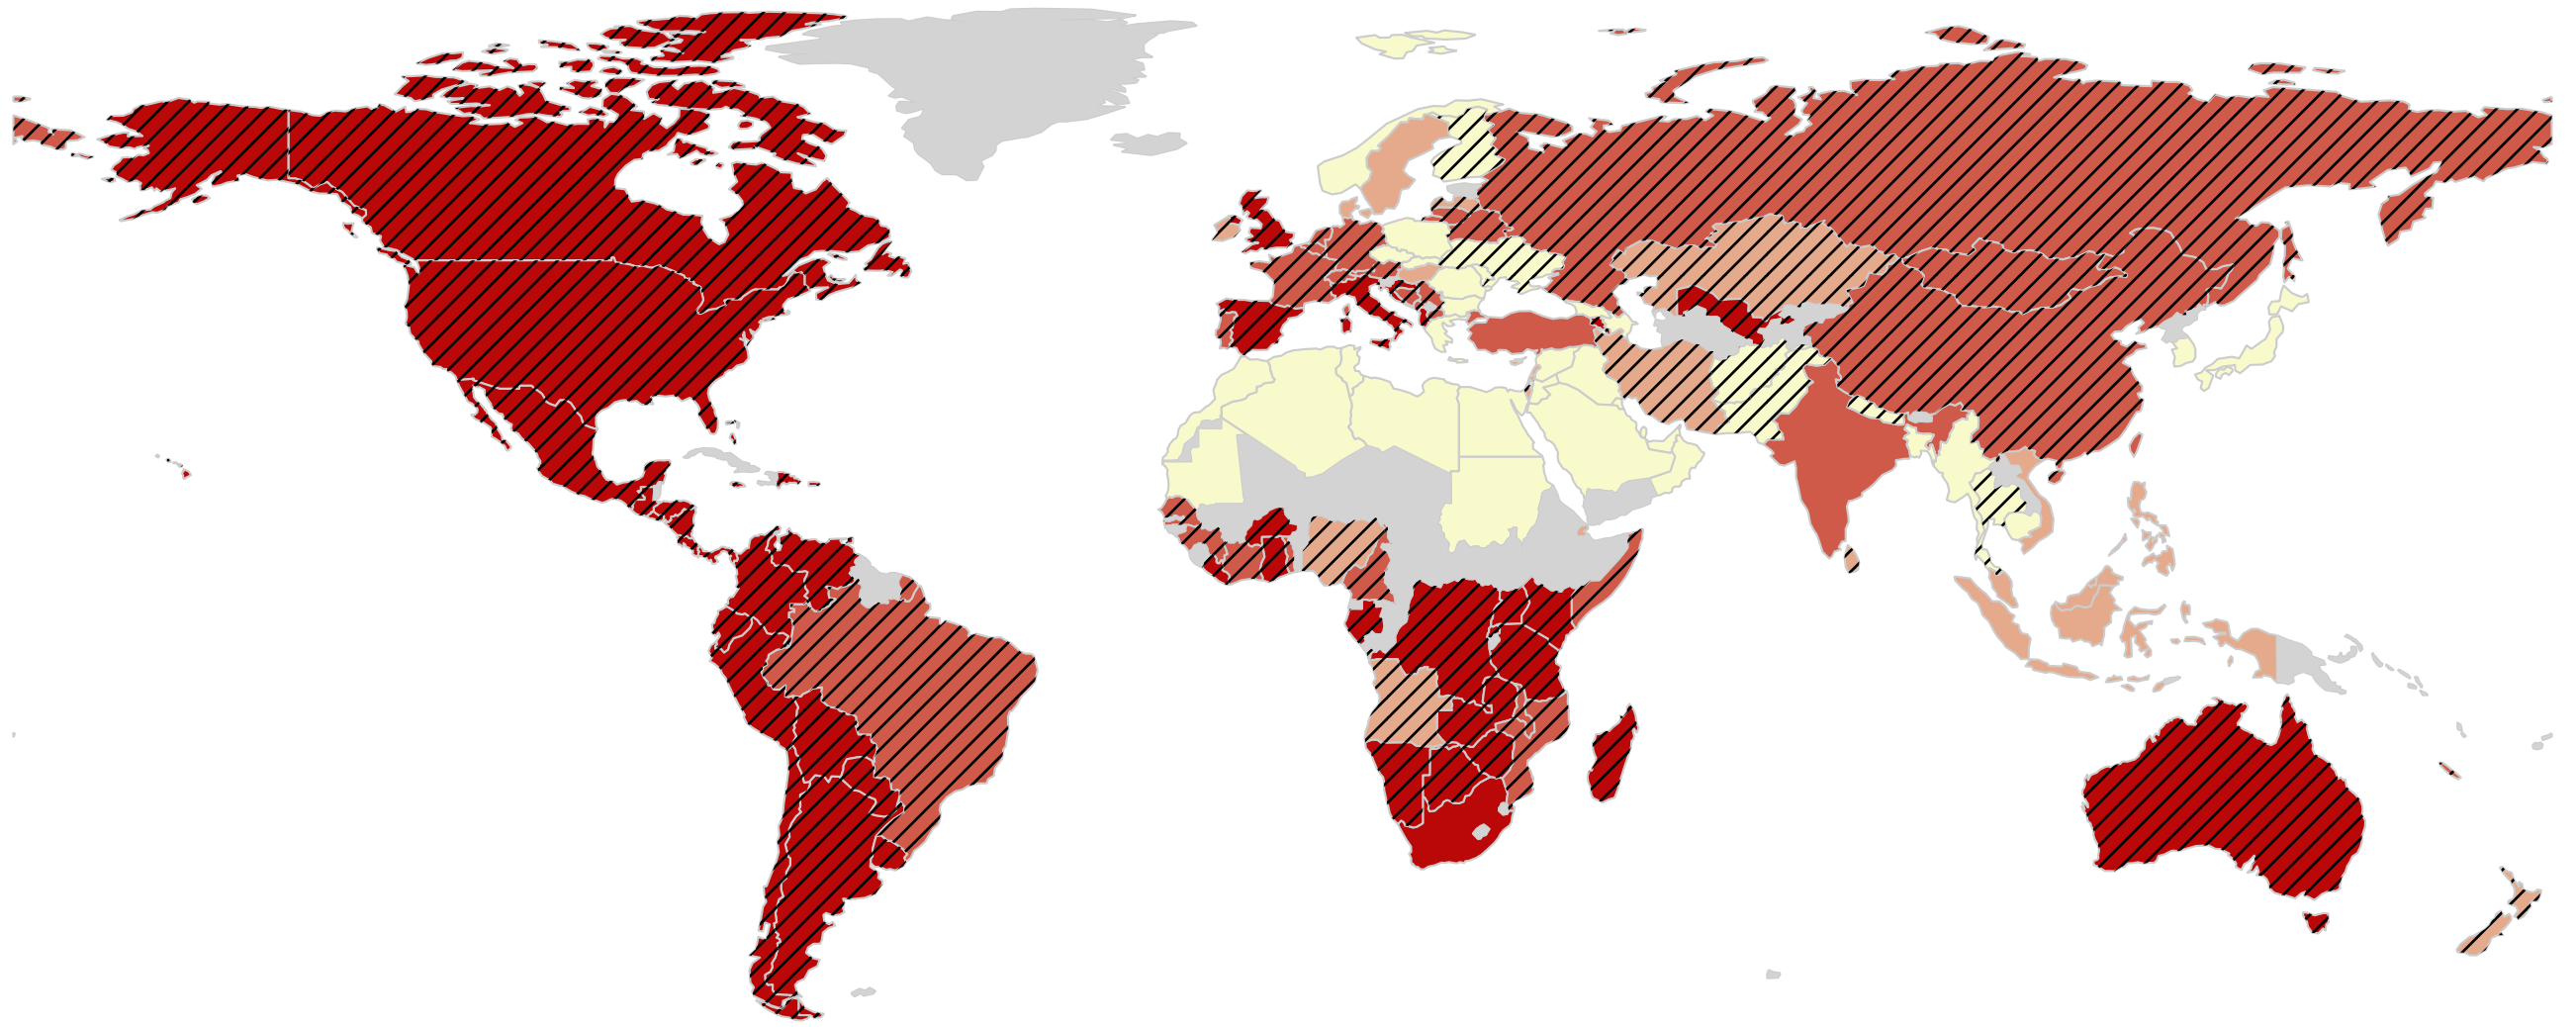

$\leq 0.58$  (1st Q)     $\leq 0.82$  (2nd Q)     $\leq 1.30$  (3rd Q)     $\leq 1.90$  (4th Q)    No Data    High Refusal

Supplement: supplementary_material [file attachment]

■ Llama 3.1 70B ○ Human Preference

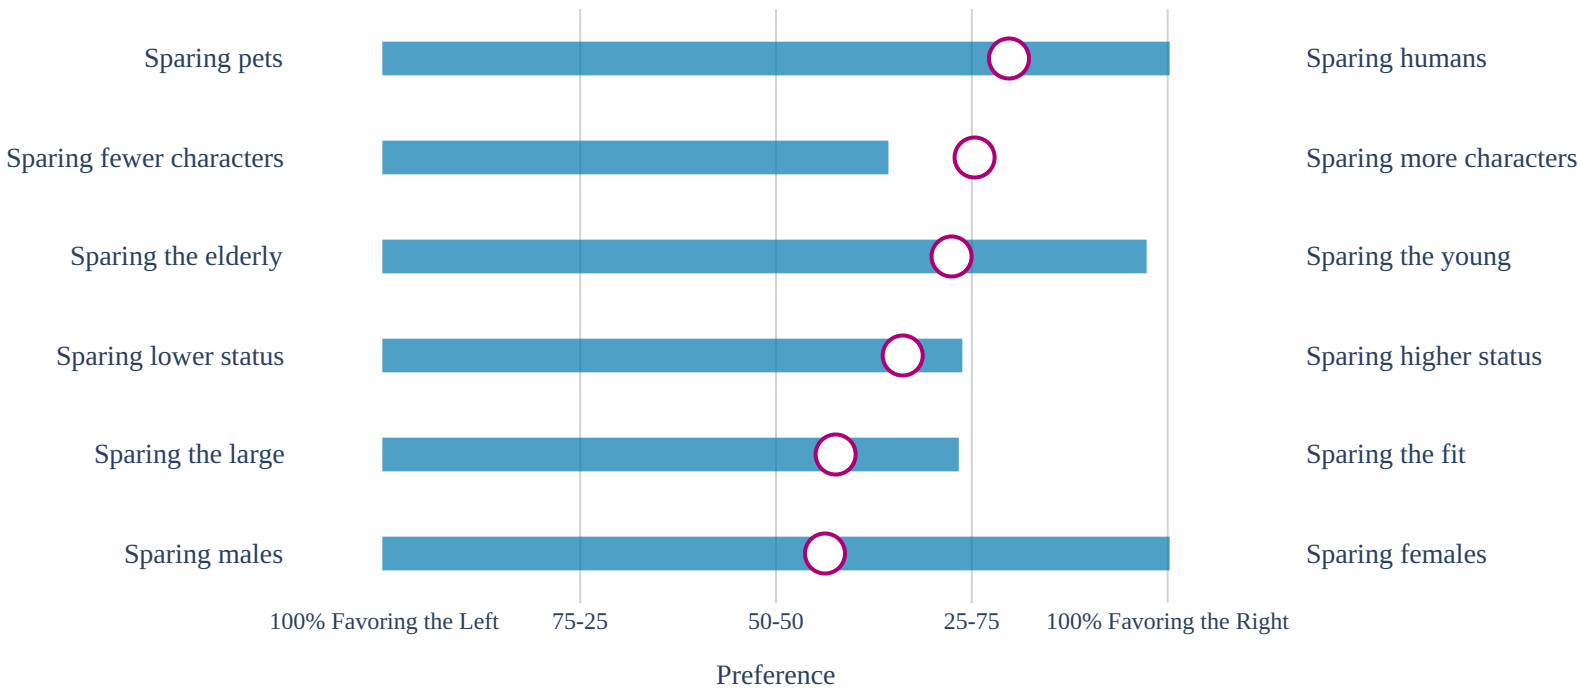

Supplement: supplementary_material [file attachment]

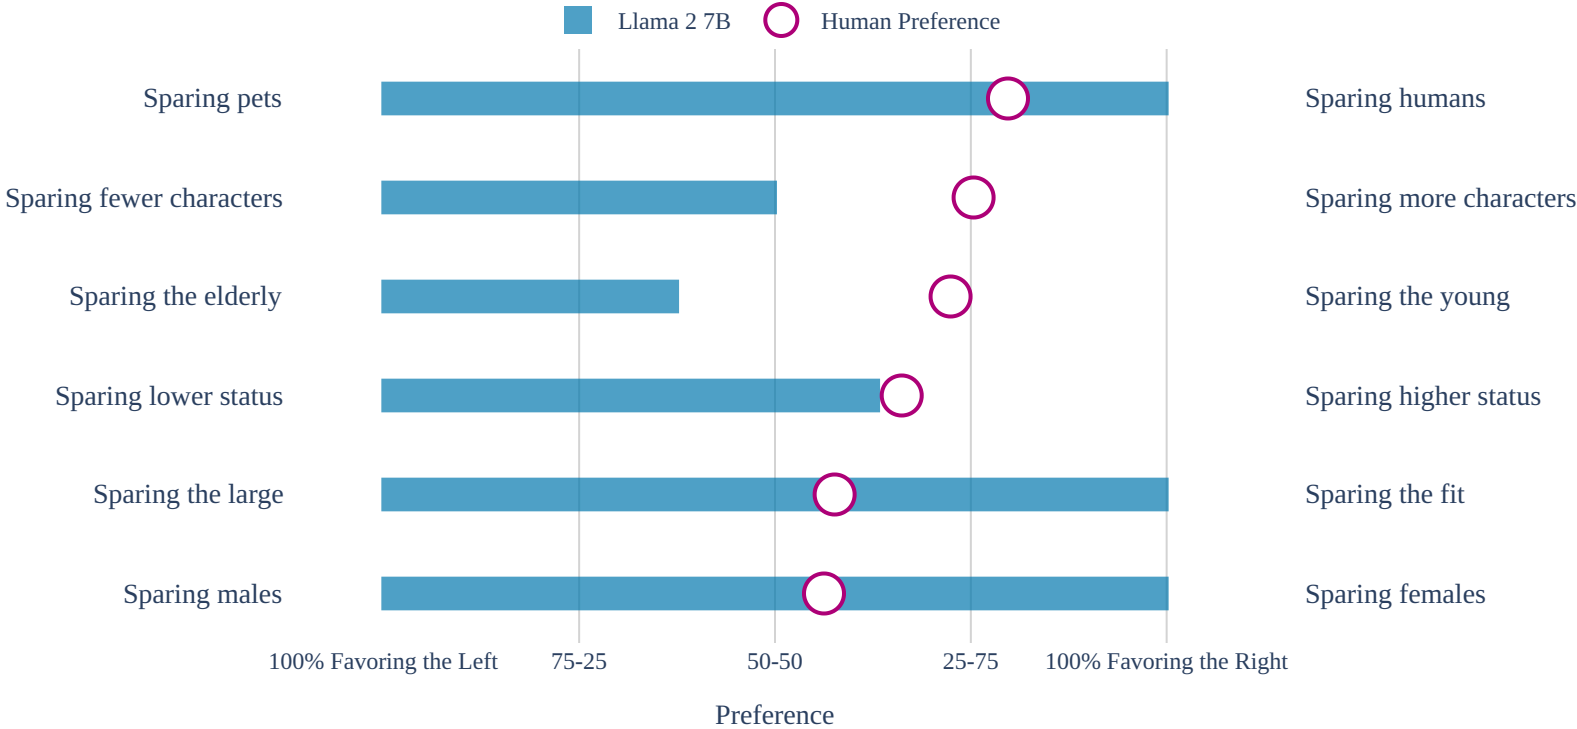

Supplement: supplementary_material [file attachment]

Gemma 2 27B

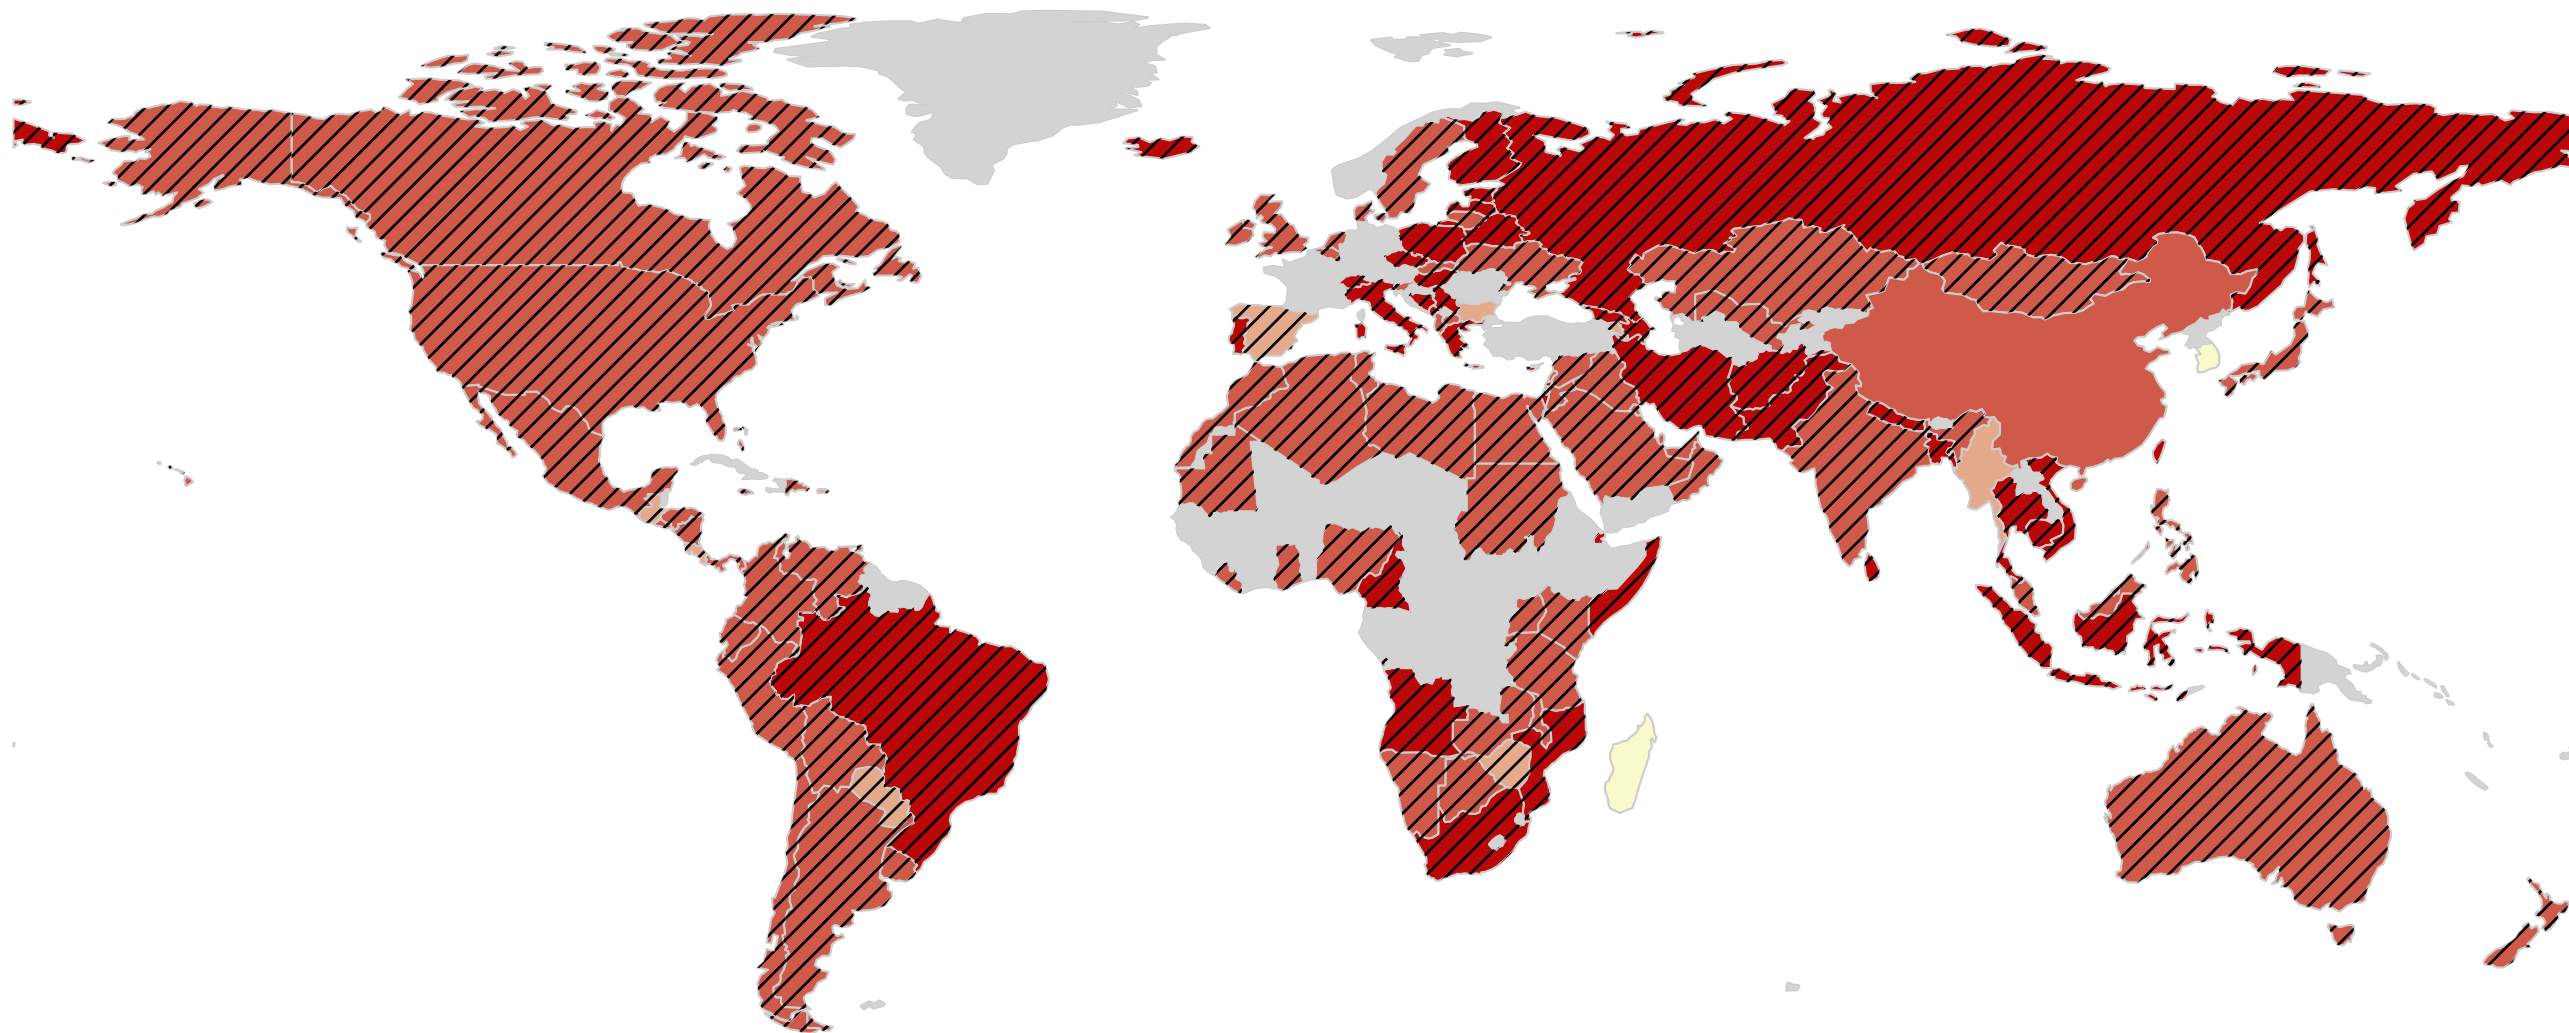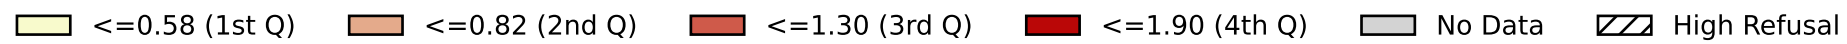

Supplement: supplementary_material [file attachment]

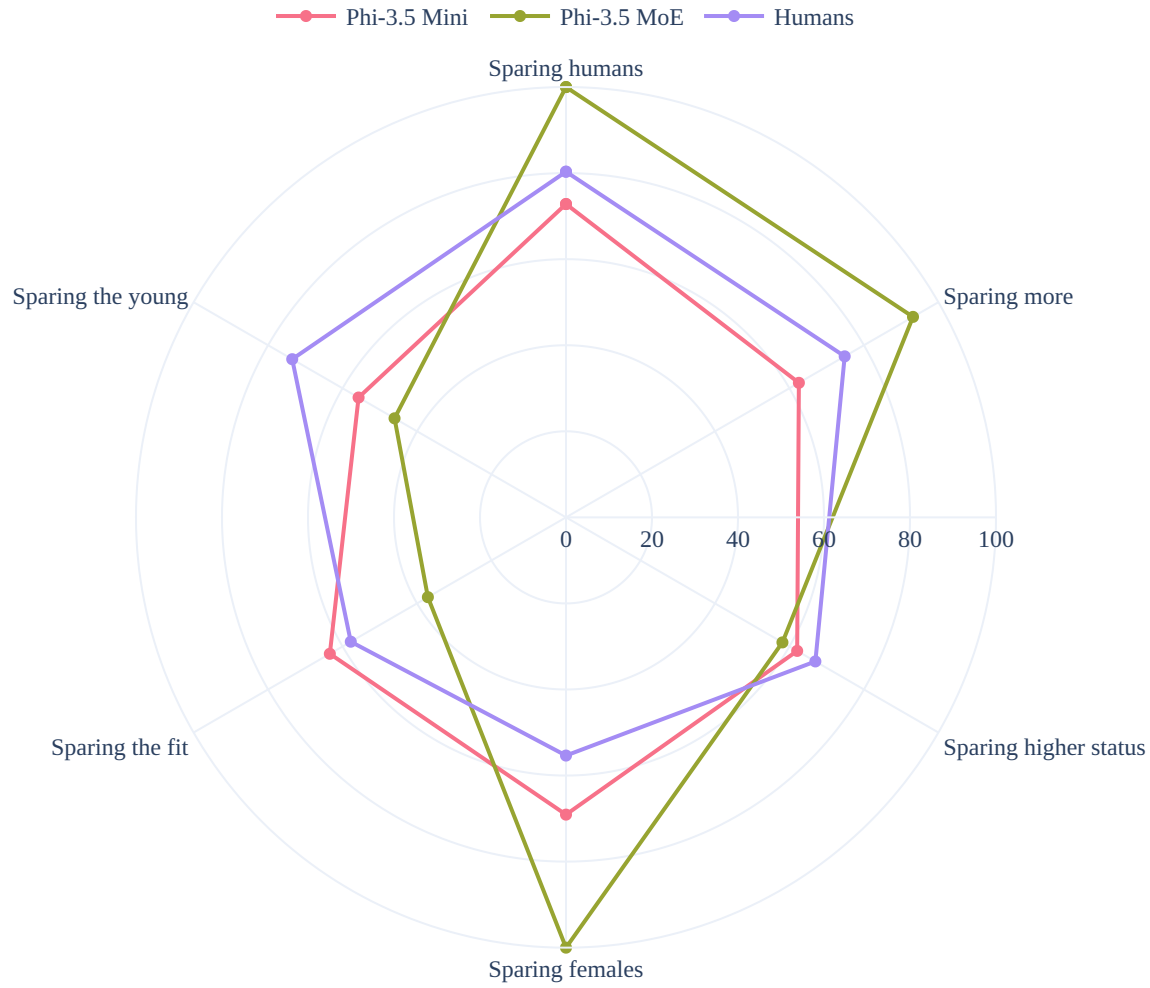

Supplement: supplementary_material [file attachment]

Llama 2 7B

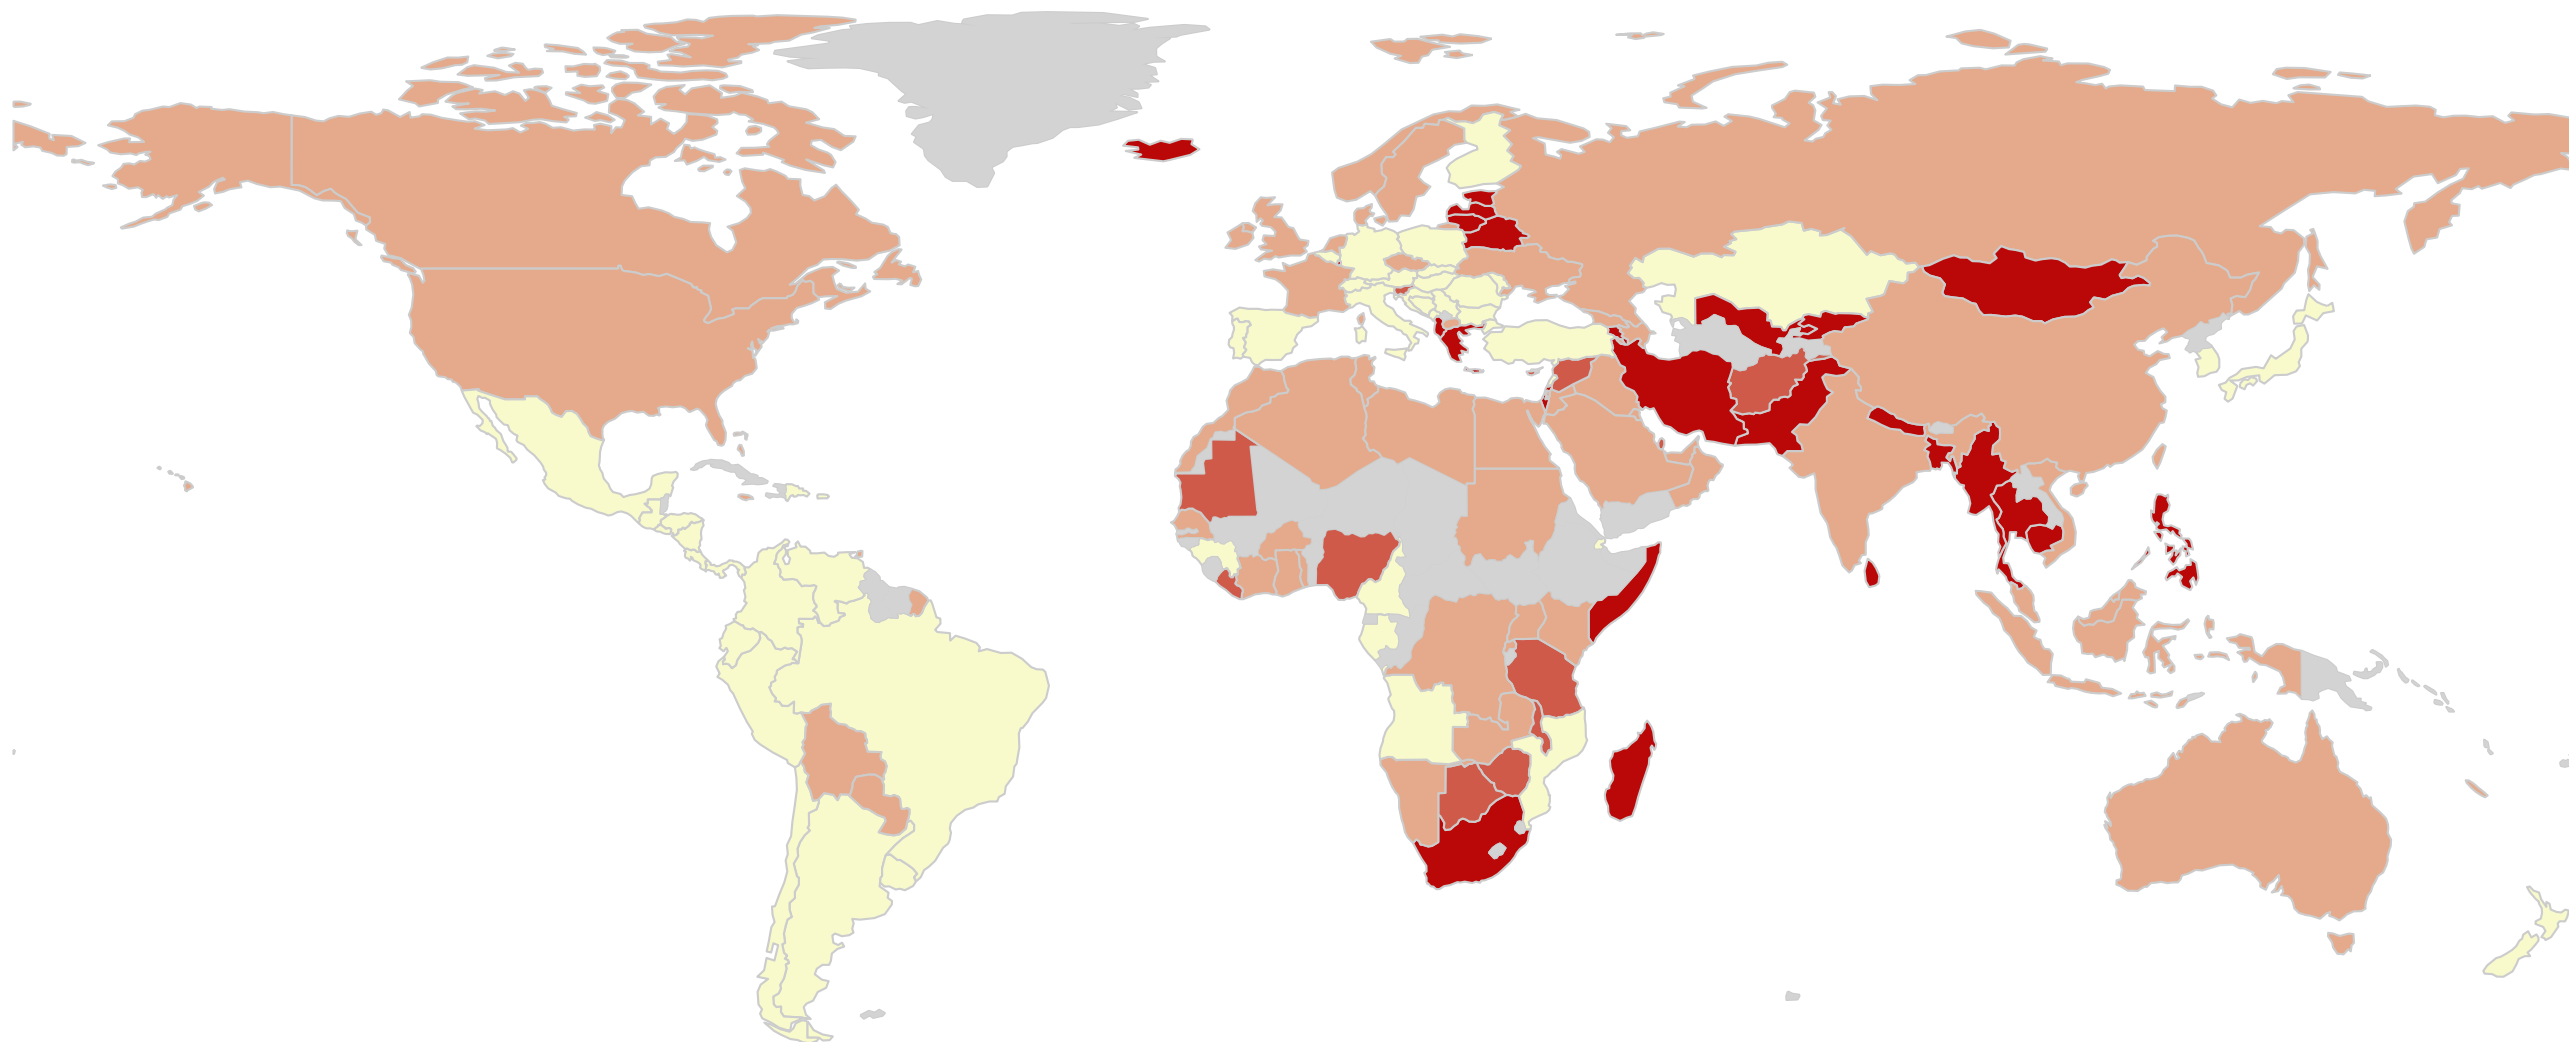

  $\leq 0.58$  (1st Q)     $\leq 0.82$  (2nd Q)     $\leq 1.30$  (3rd Q)     $\leq 1.90$  (4th Q)    No Data

Supplement: supplementary_material [file attachment]

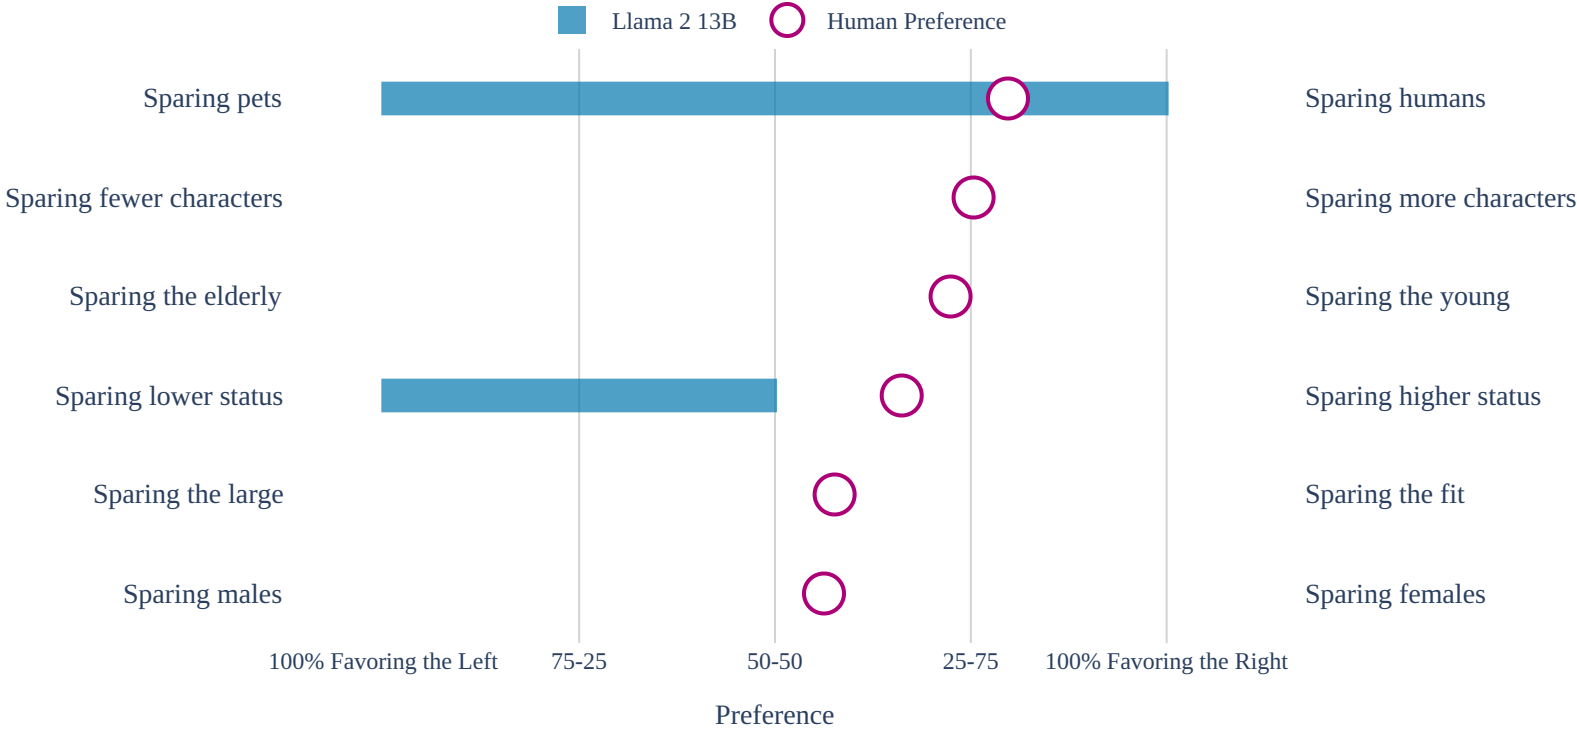

Supplement: supplementary_material [file attachment]

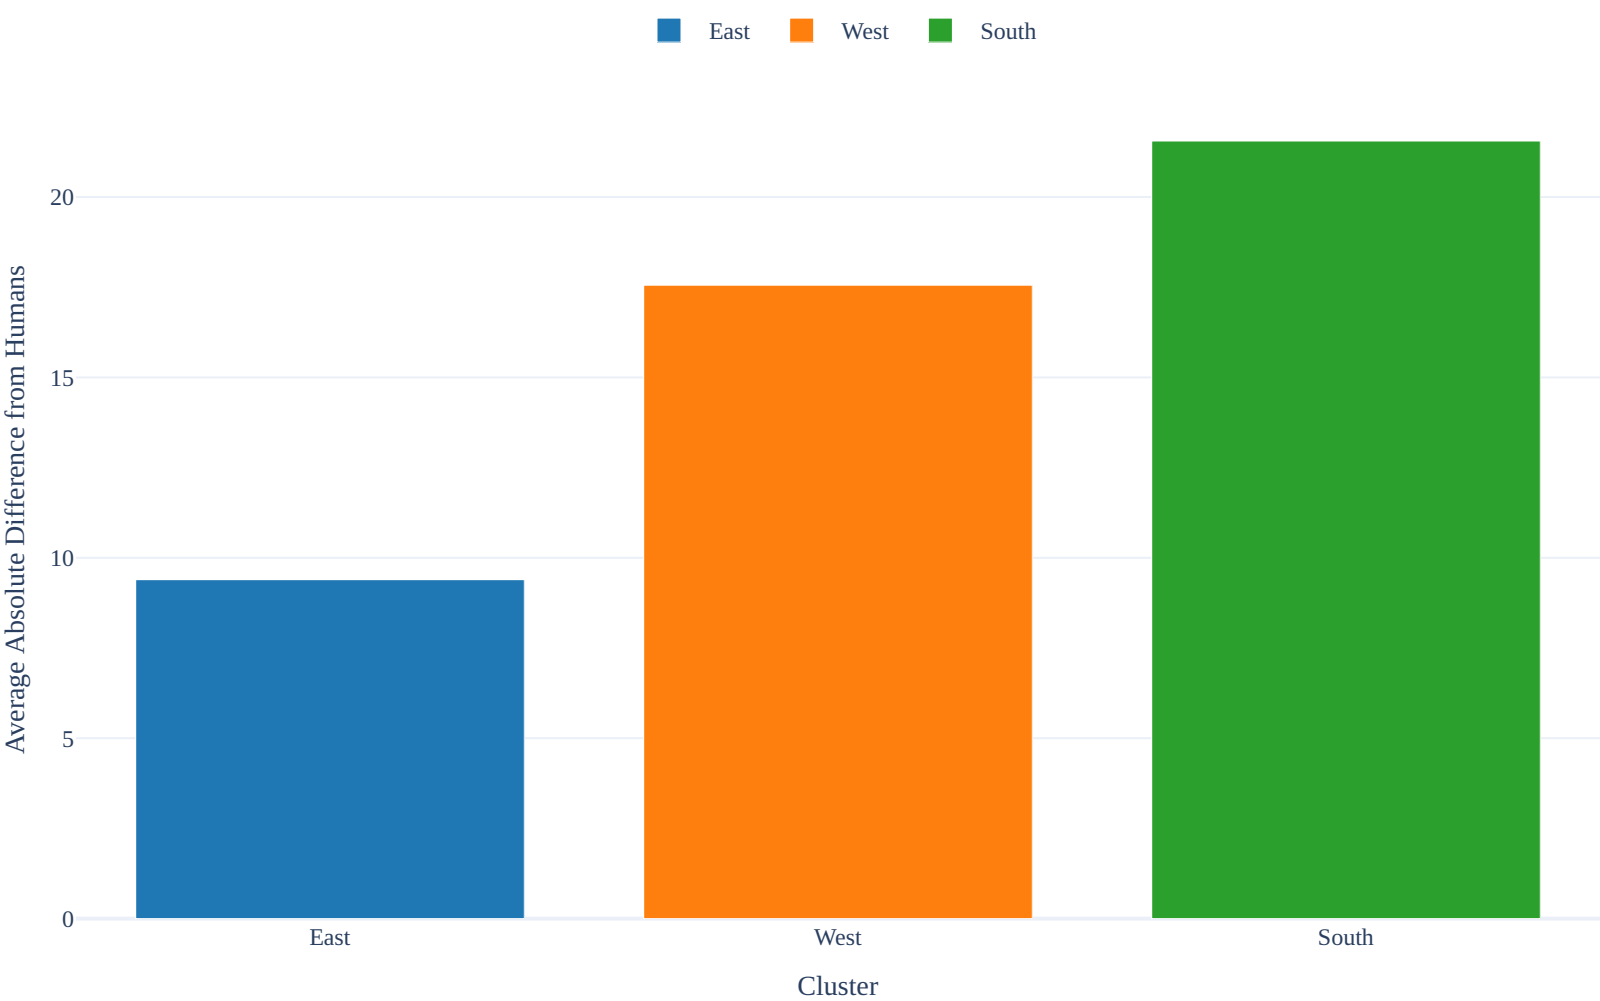

Supplement: supplementary_material [file attachment]

Gemma 2 2B Gemma 2 9B Gemma 2 27B Humans

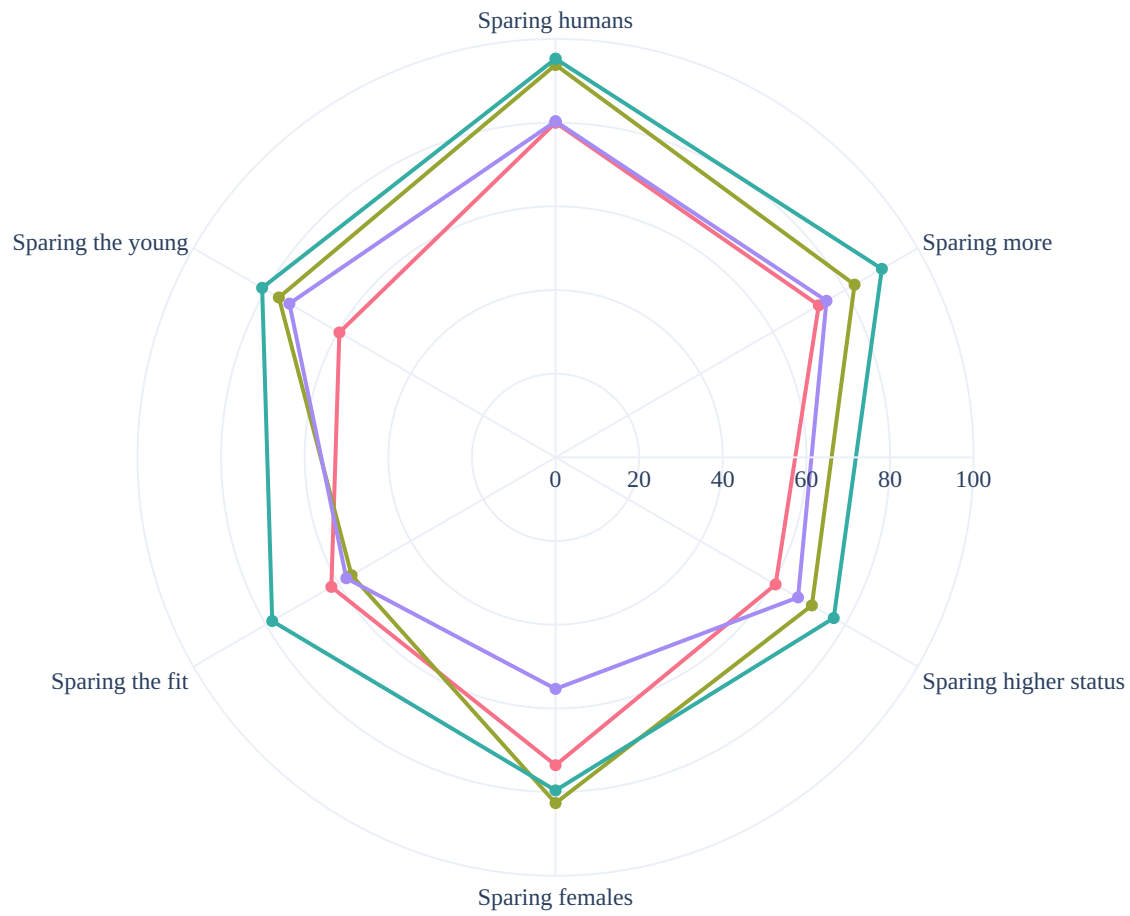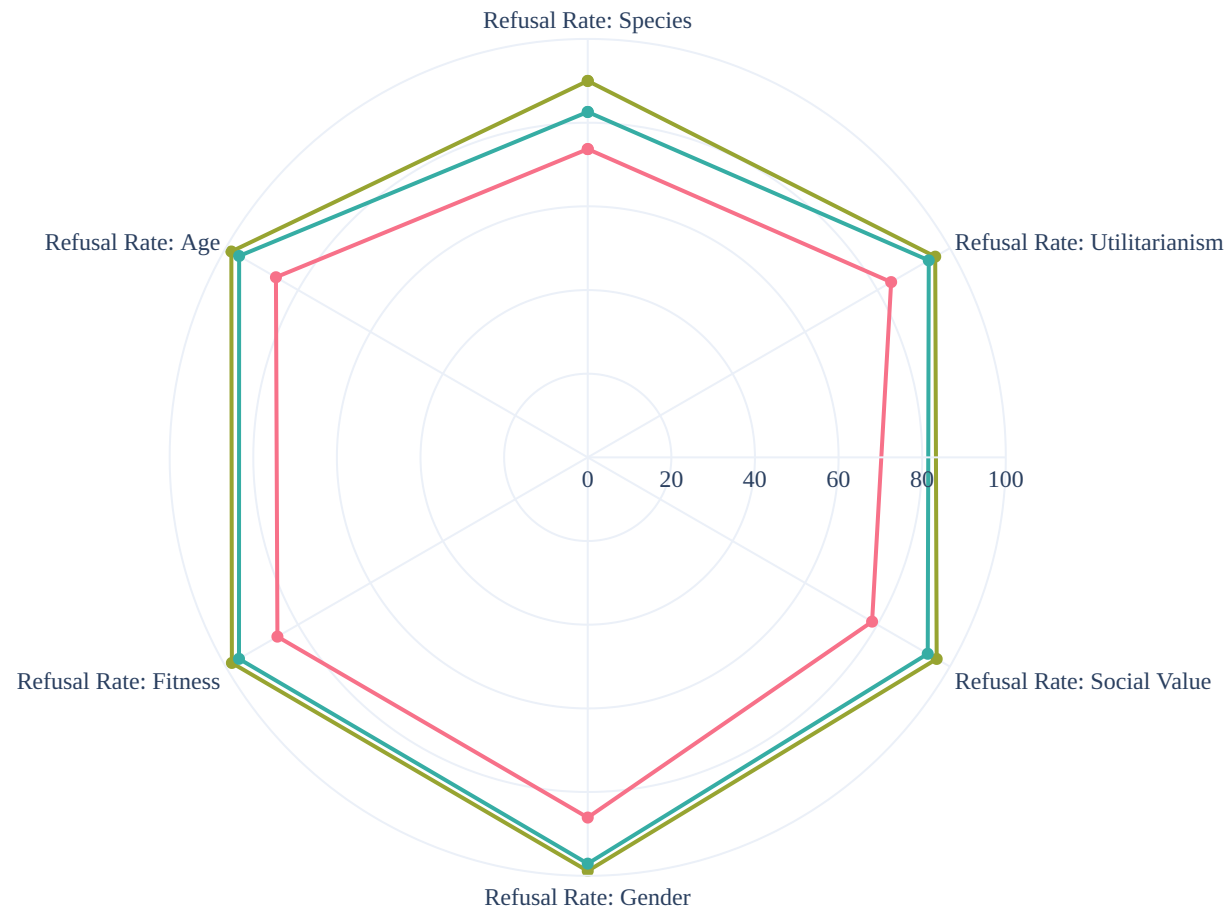

Supplement: supplementary_material [file attachment]

Llama 3.1 70B

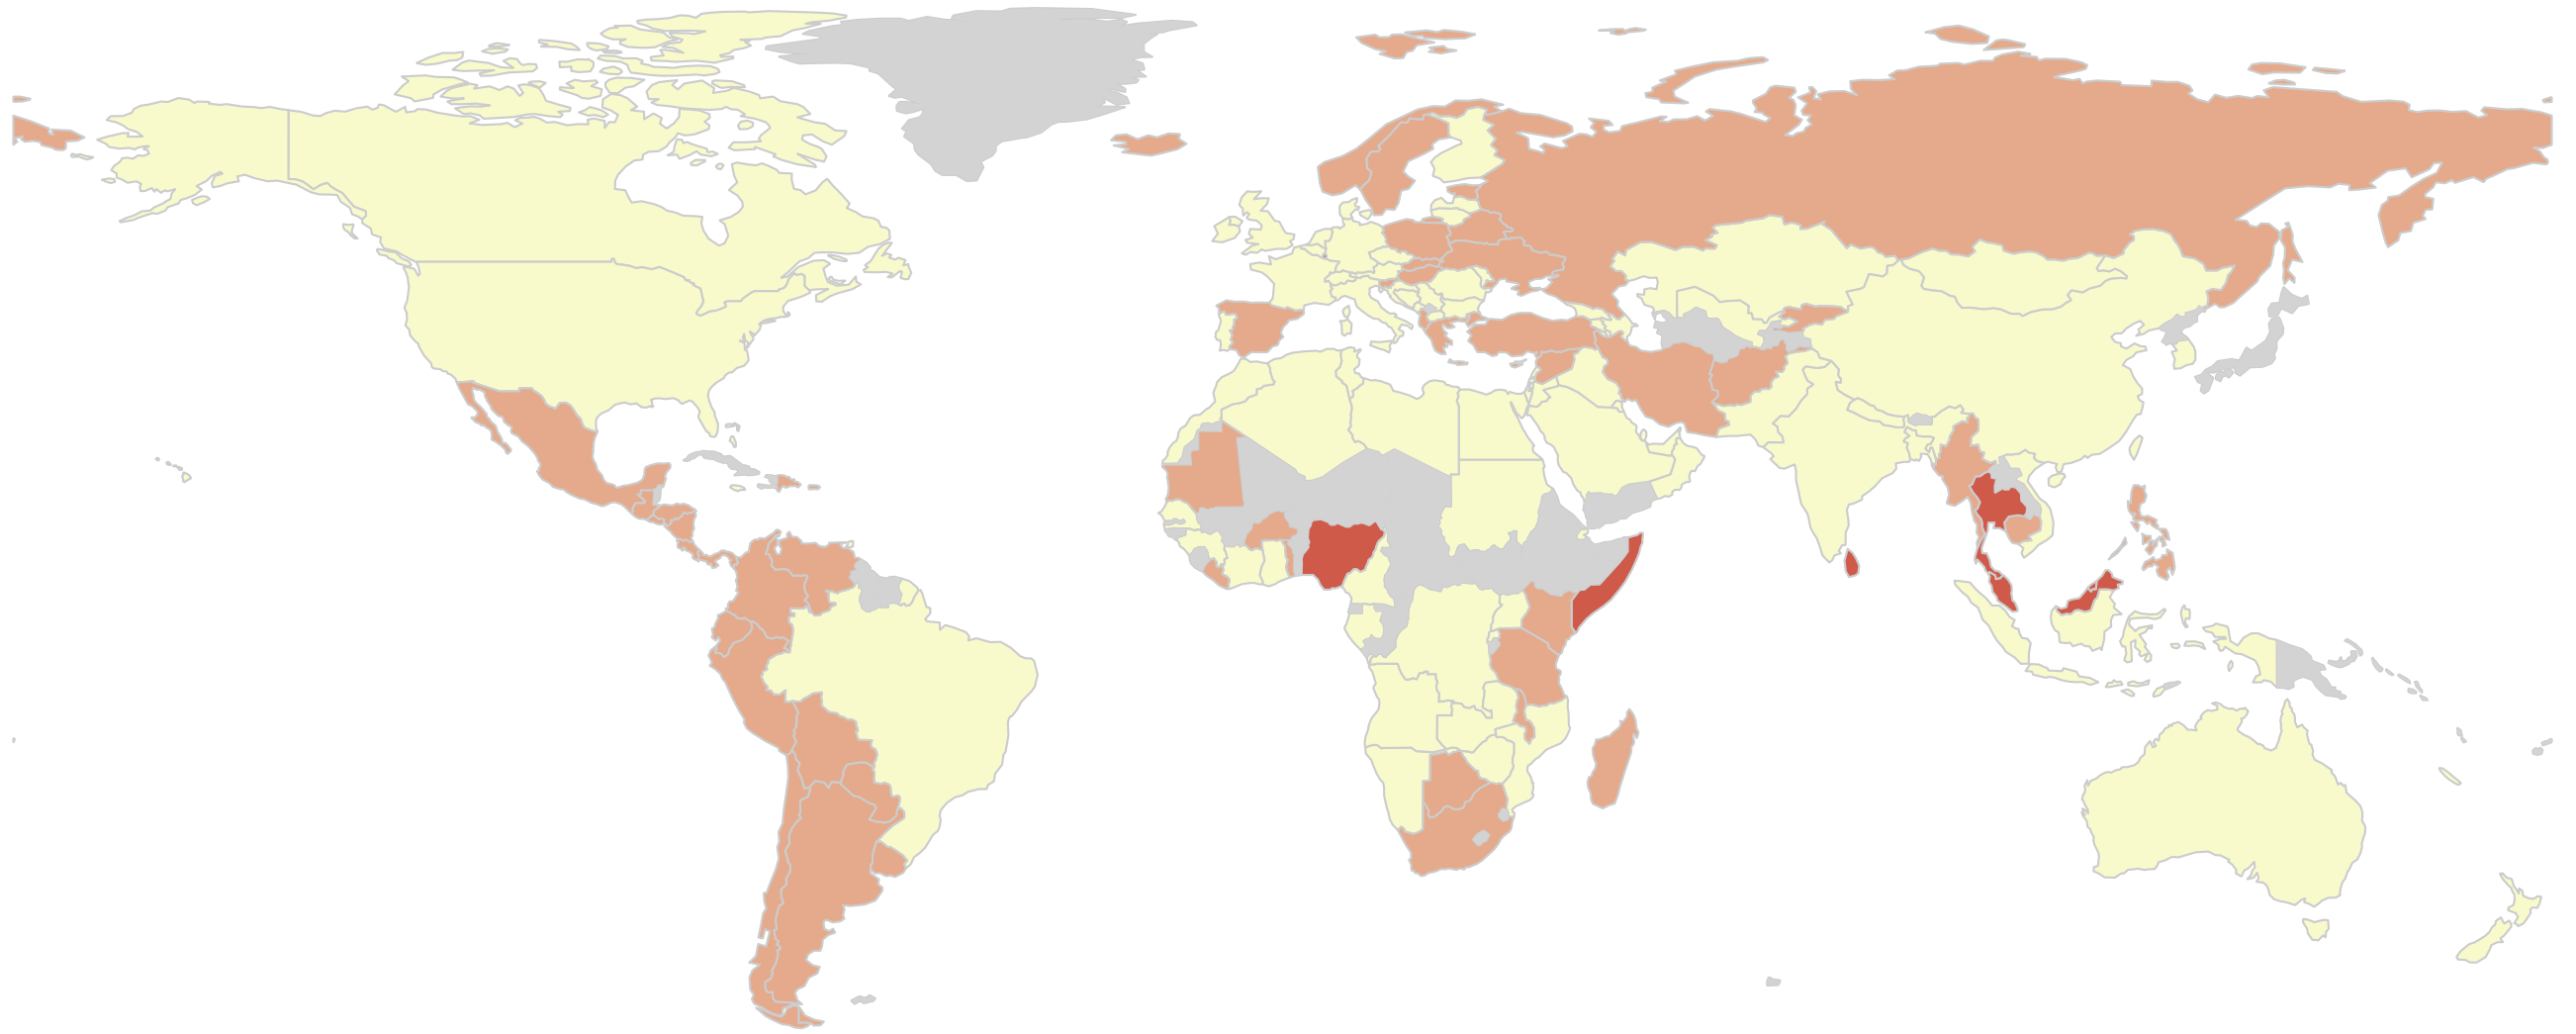

$\leq 0.58$  (1st Q)      $\leq 0.82$  (2nd Q)      $\leq 1.30$  (3rd Q)      $\leq 1.90$  (4th Q)     No Data

Supplement: supplementary_material [file attachment]

Phi-3 Medium

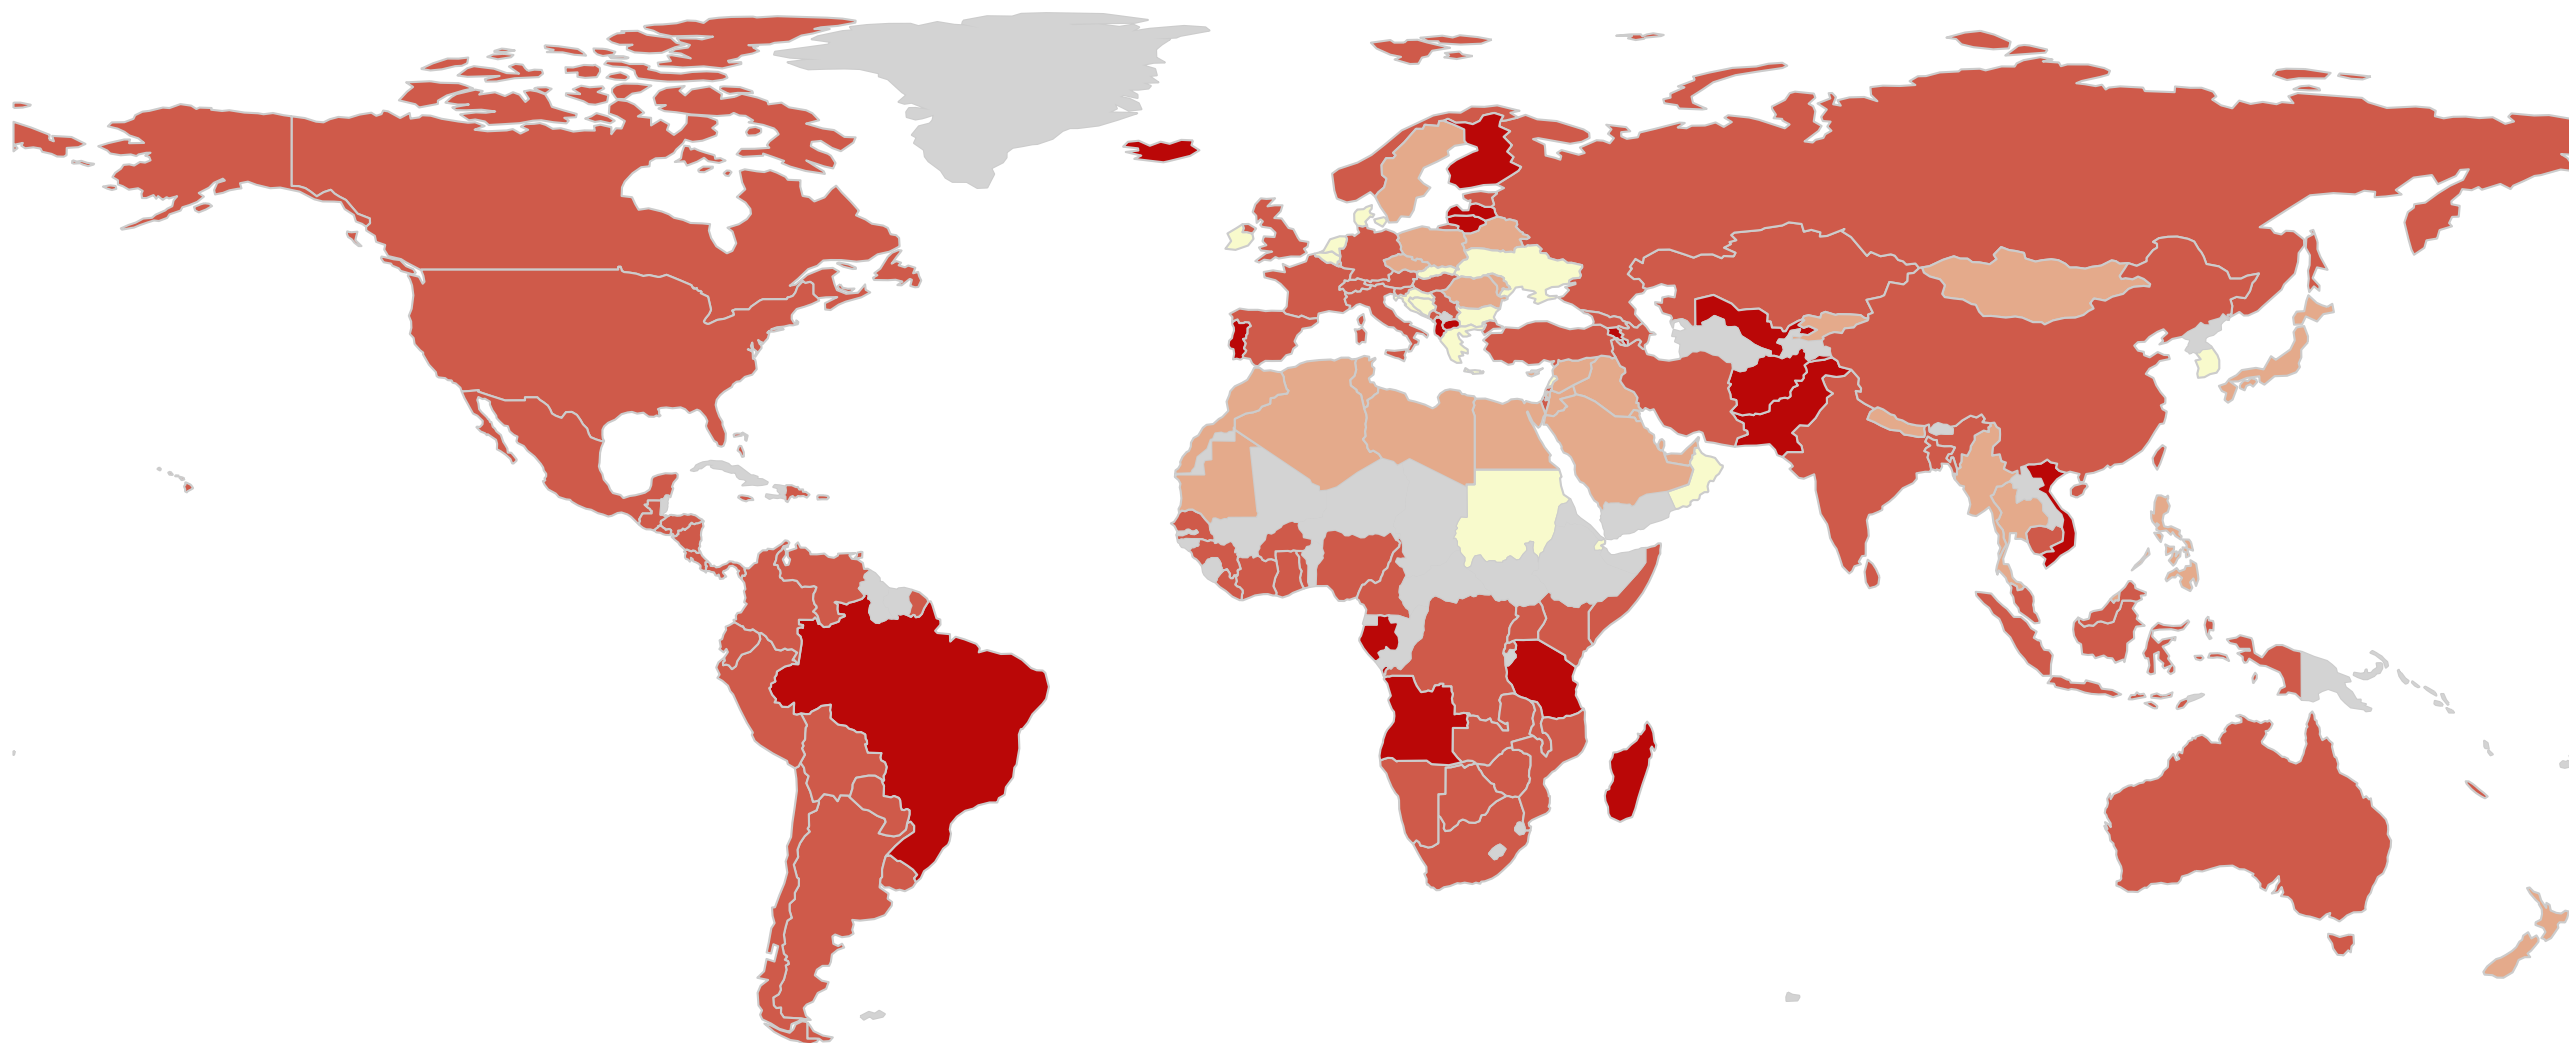

Supplement: supplementary_material [file attachment]

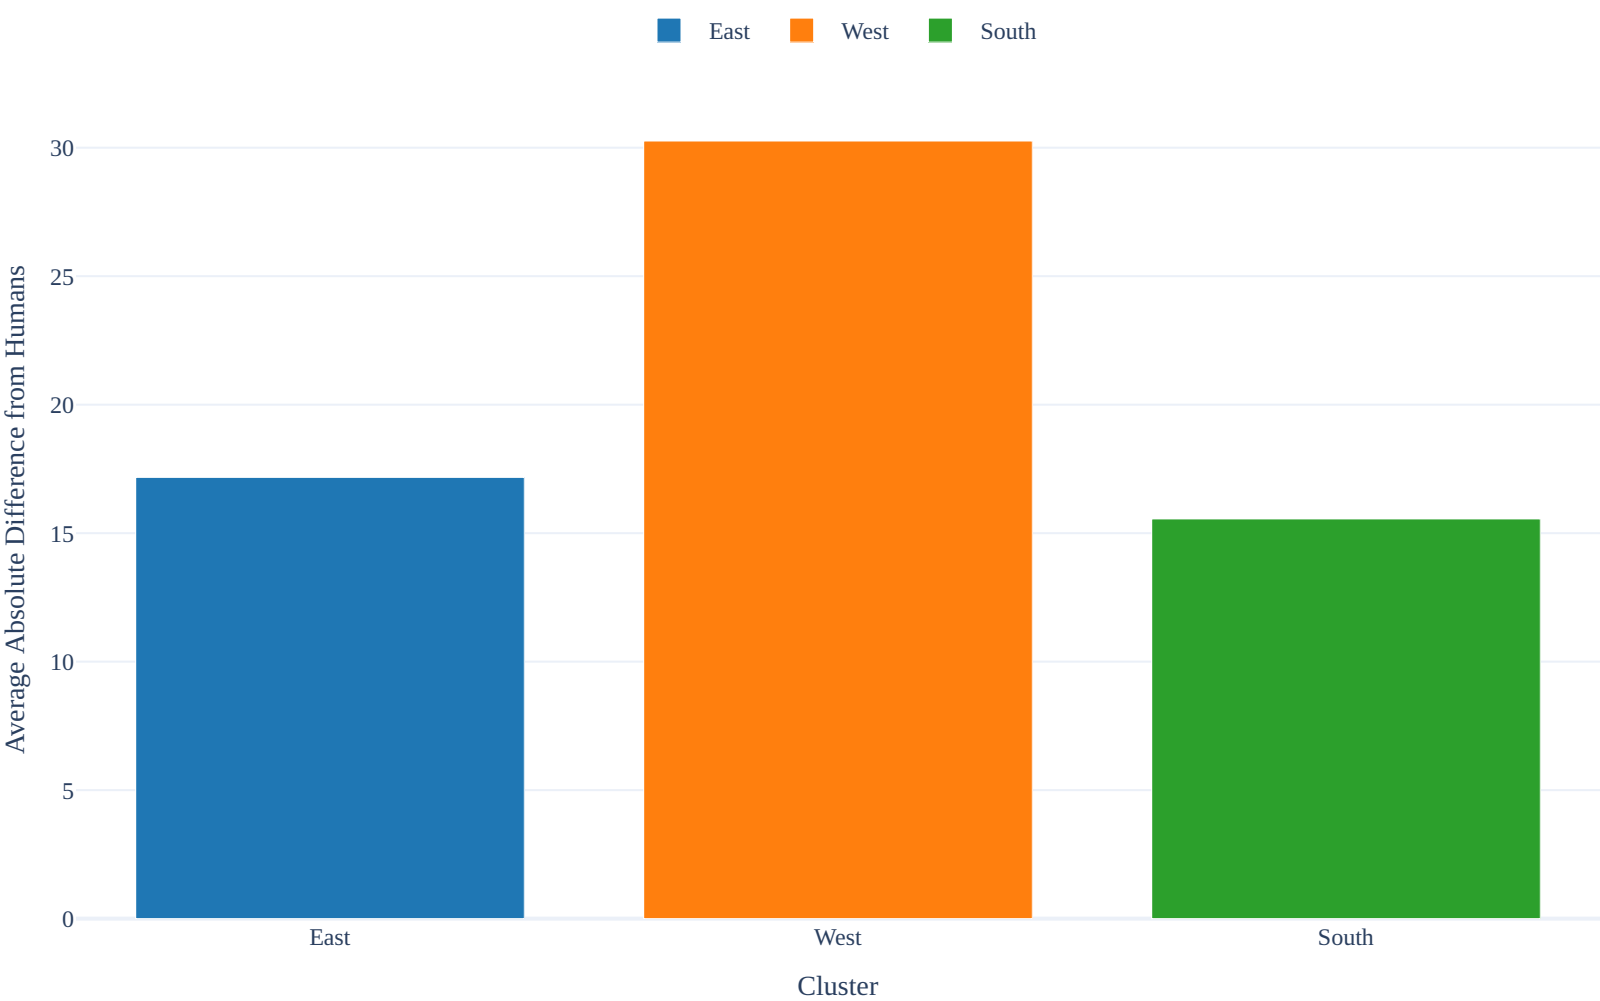

Supplement: supplementary_material [file attachment]

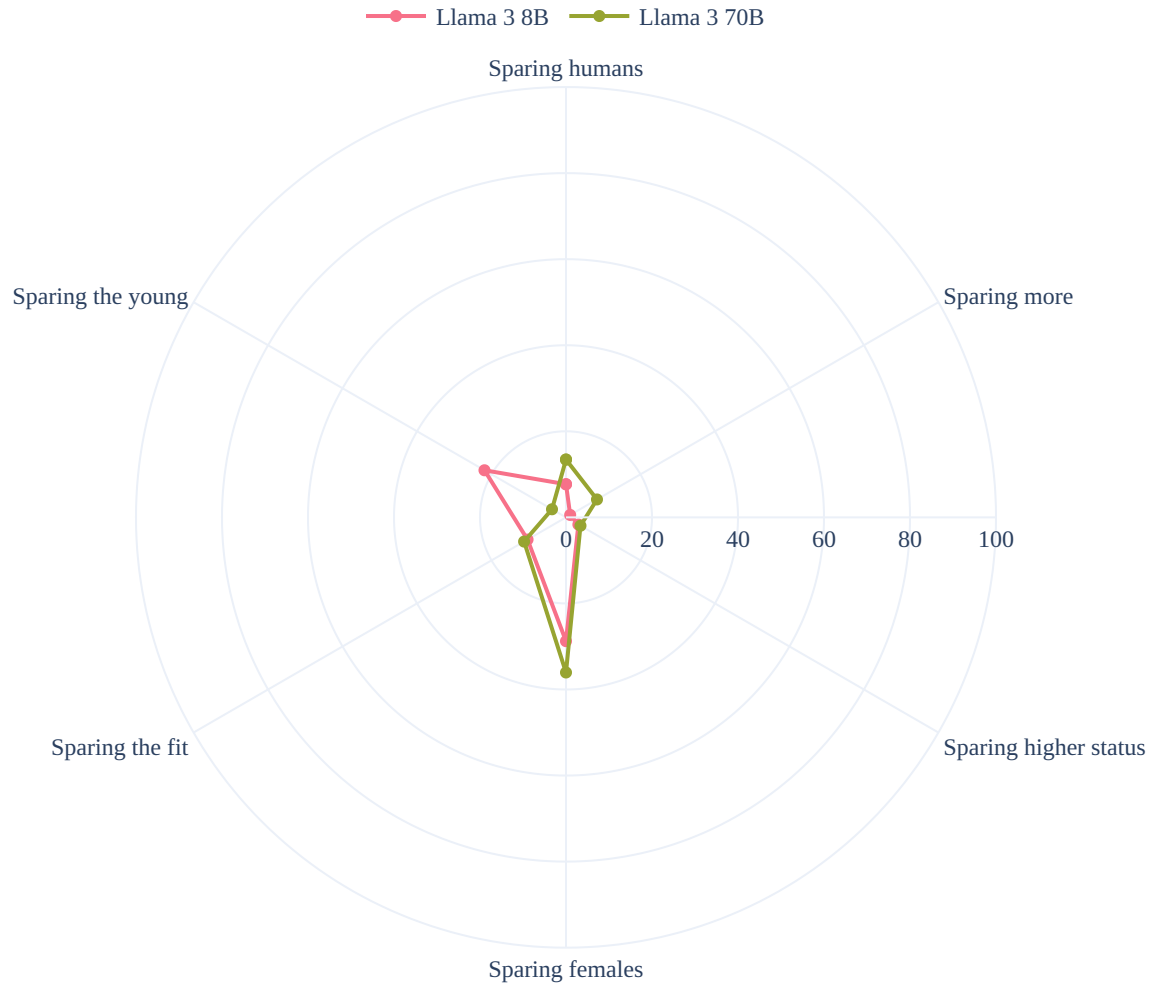

Supplement: supplementary_material [file attachment]

Llama 3.1 70B

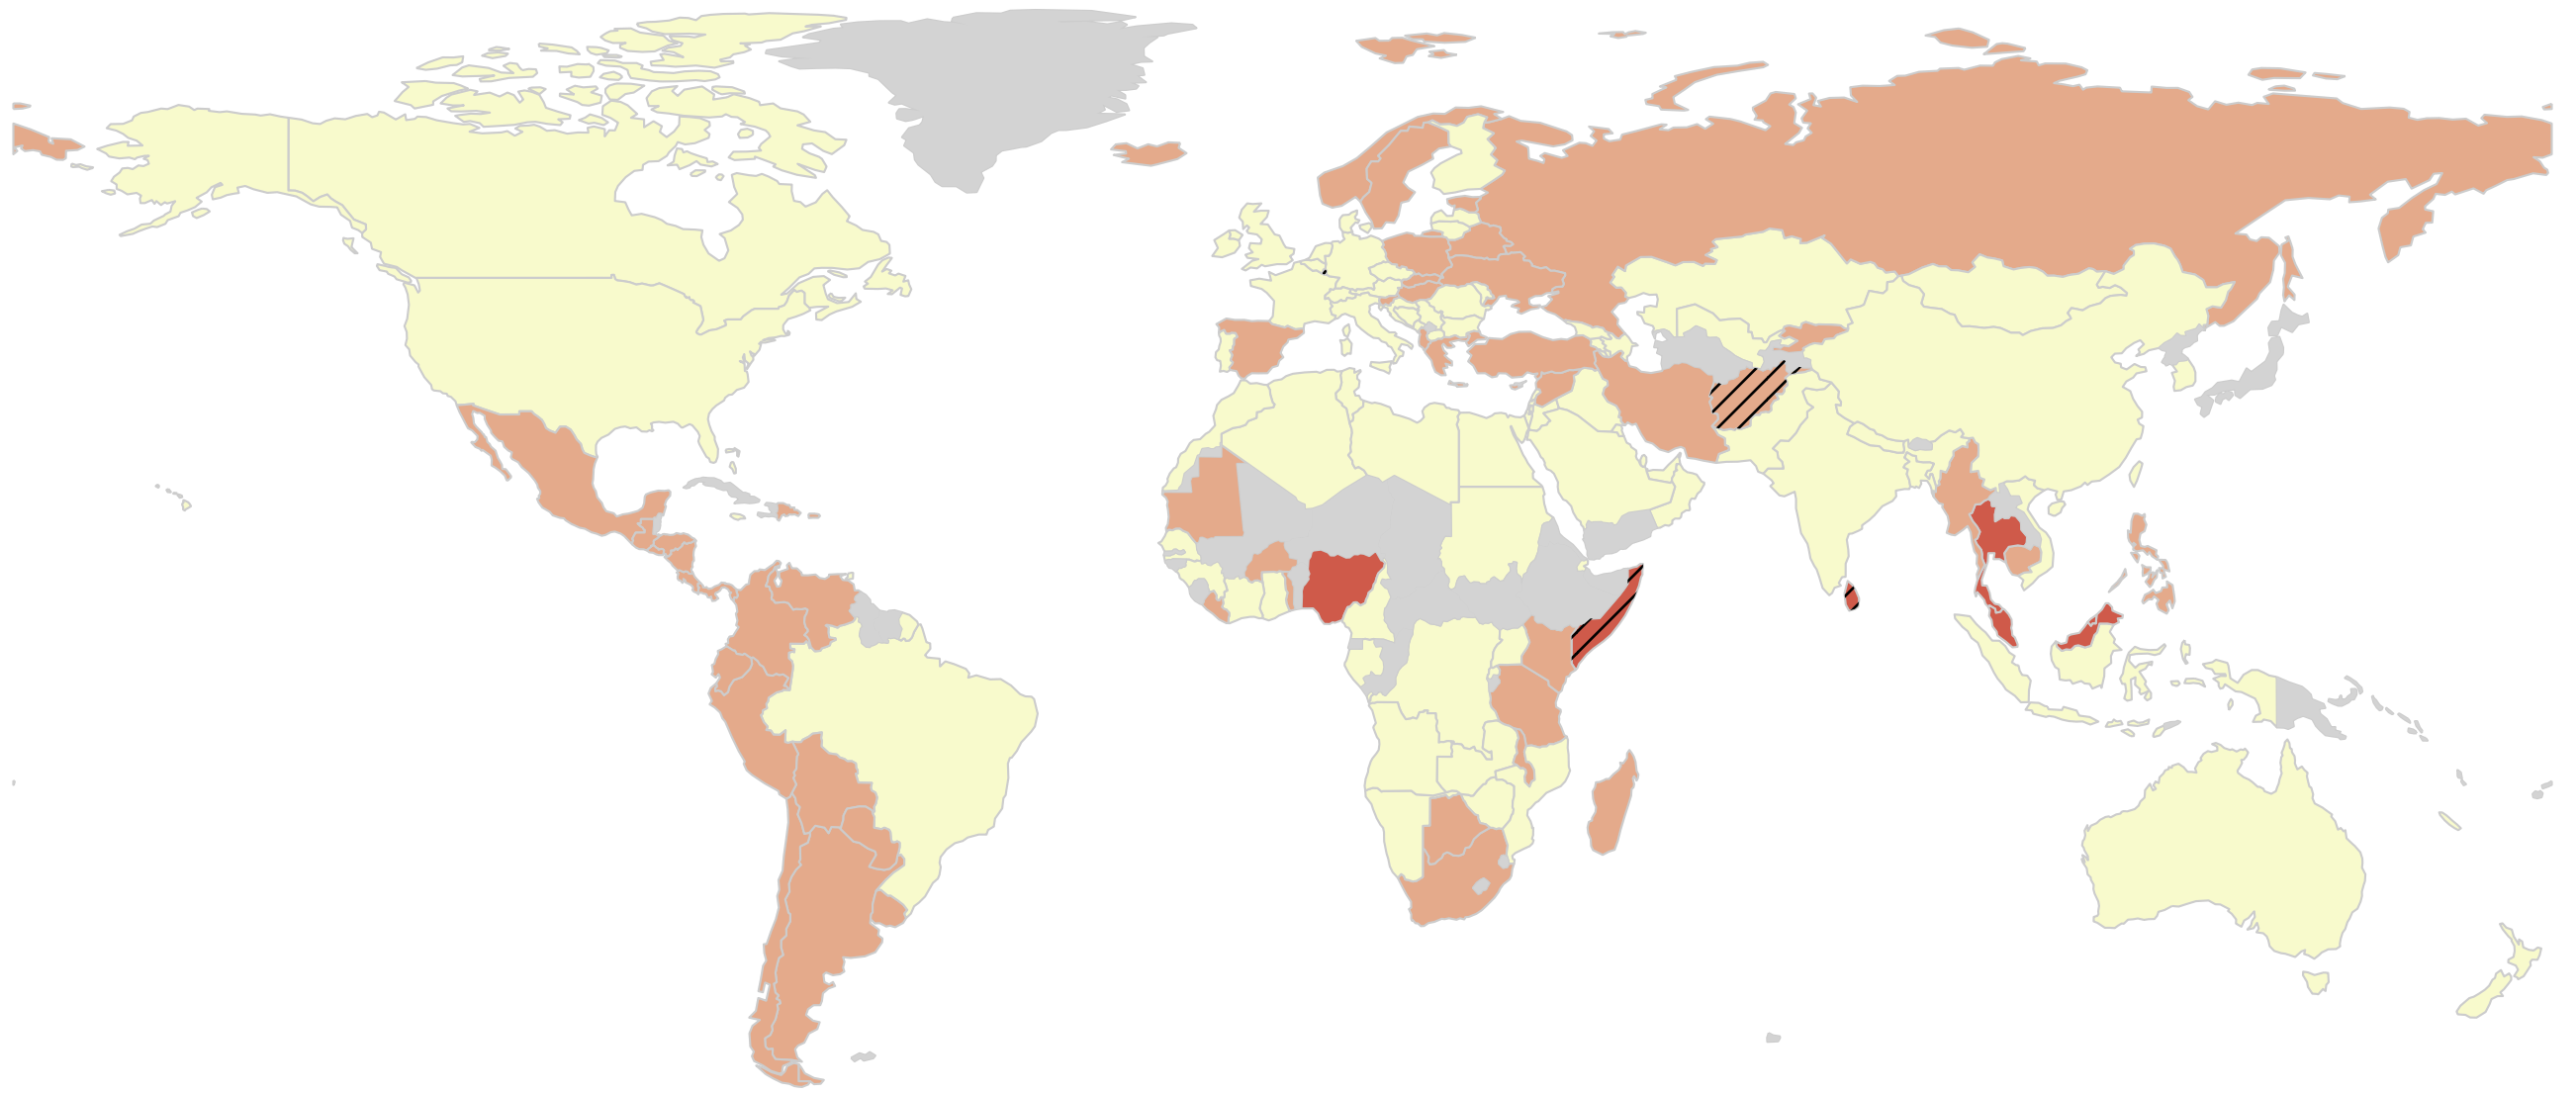

$\leq 0.58$  (1st Q)     $\leq 0.82$  (2nd Q)     $\leq 1.30$  (3rd Q)     $\leq 1.90$  (4th Q)    No Data    High Refusal

Supplement: supplementary_material [file attachment]

■ Llama 2 70B ○ Human Preference

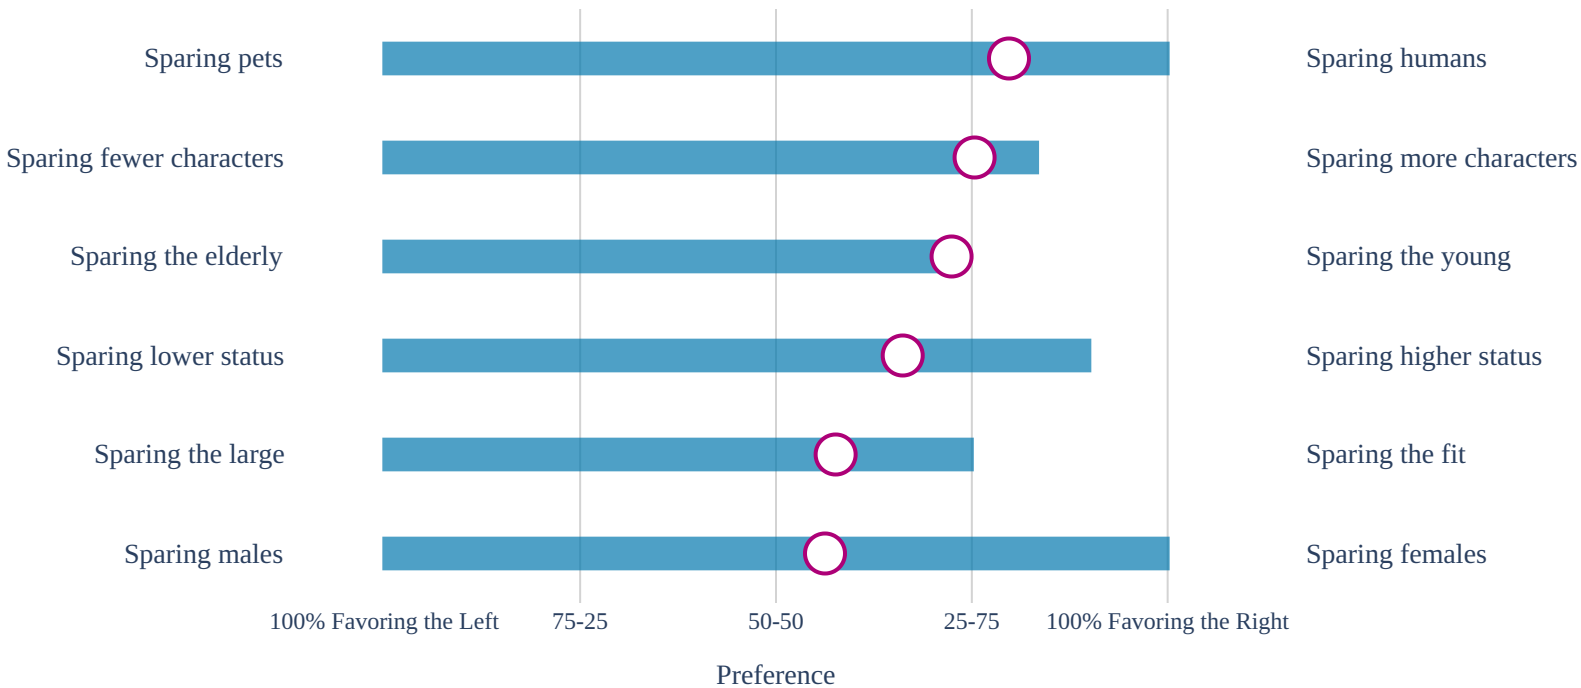

Supplement: supplementary_material [file attachment]

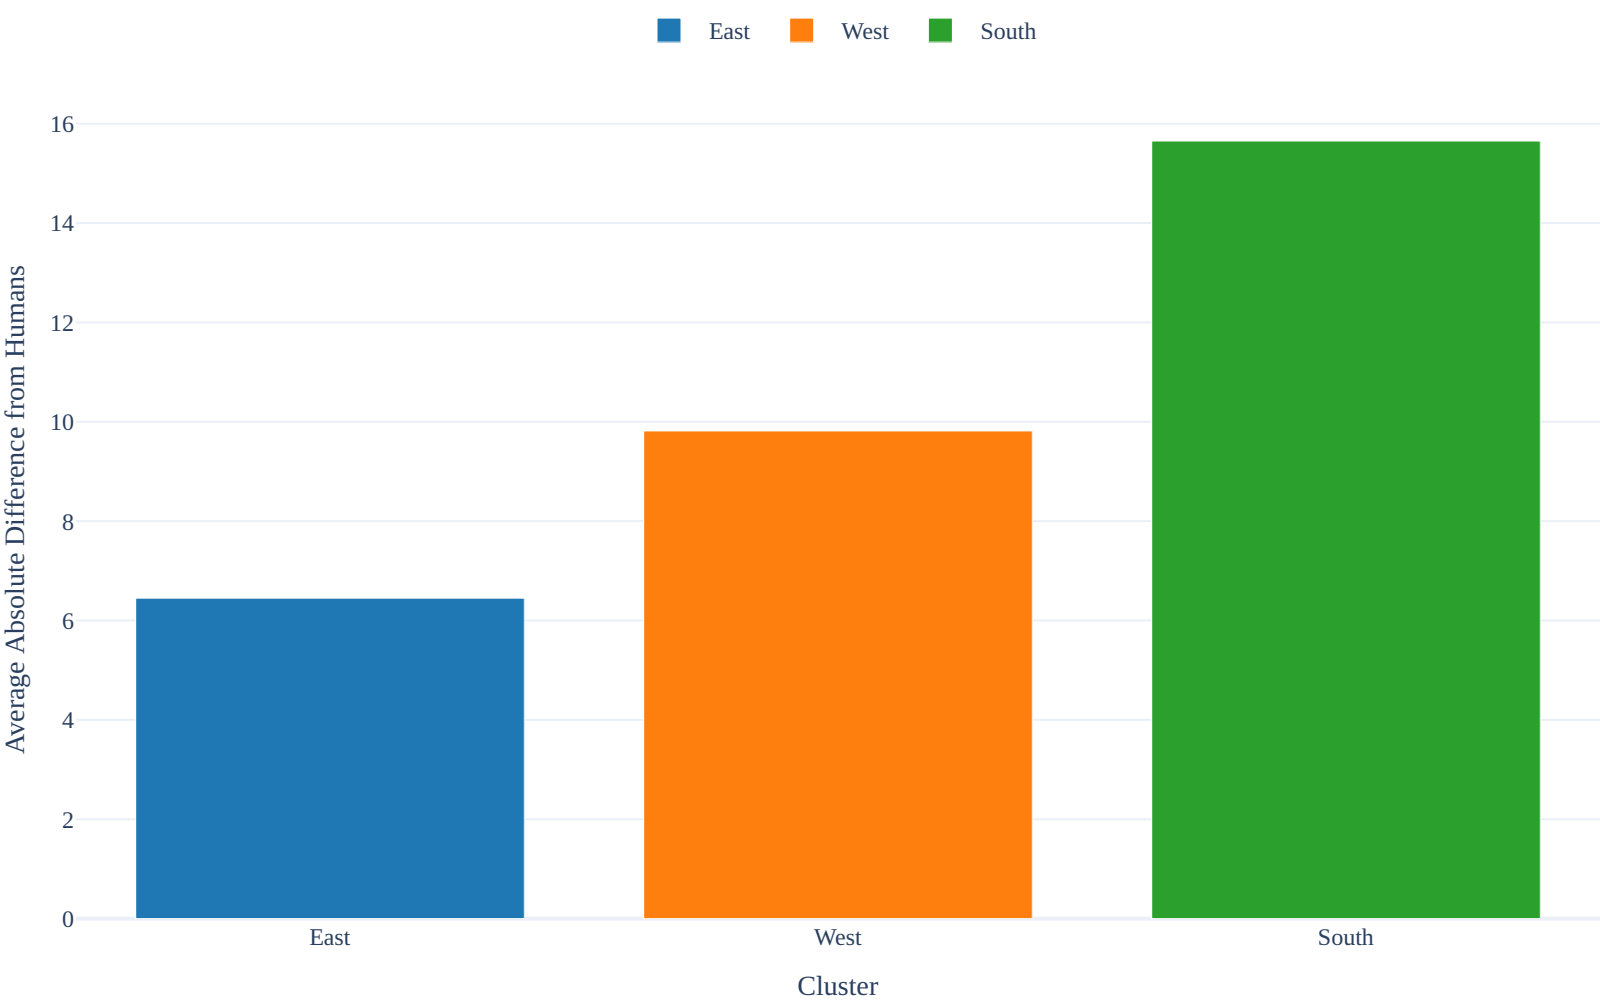

Supplement: supplementary_material [file attachment]

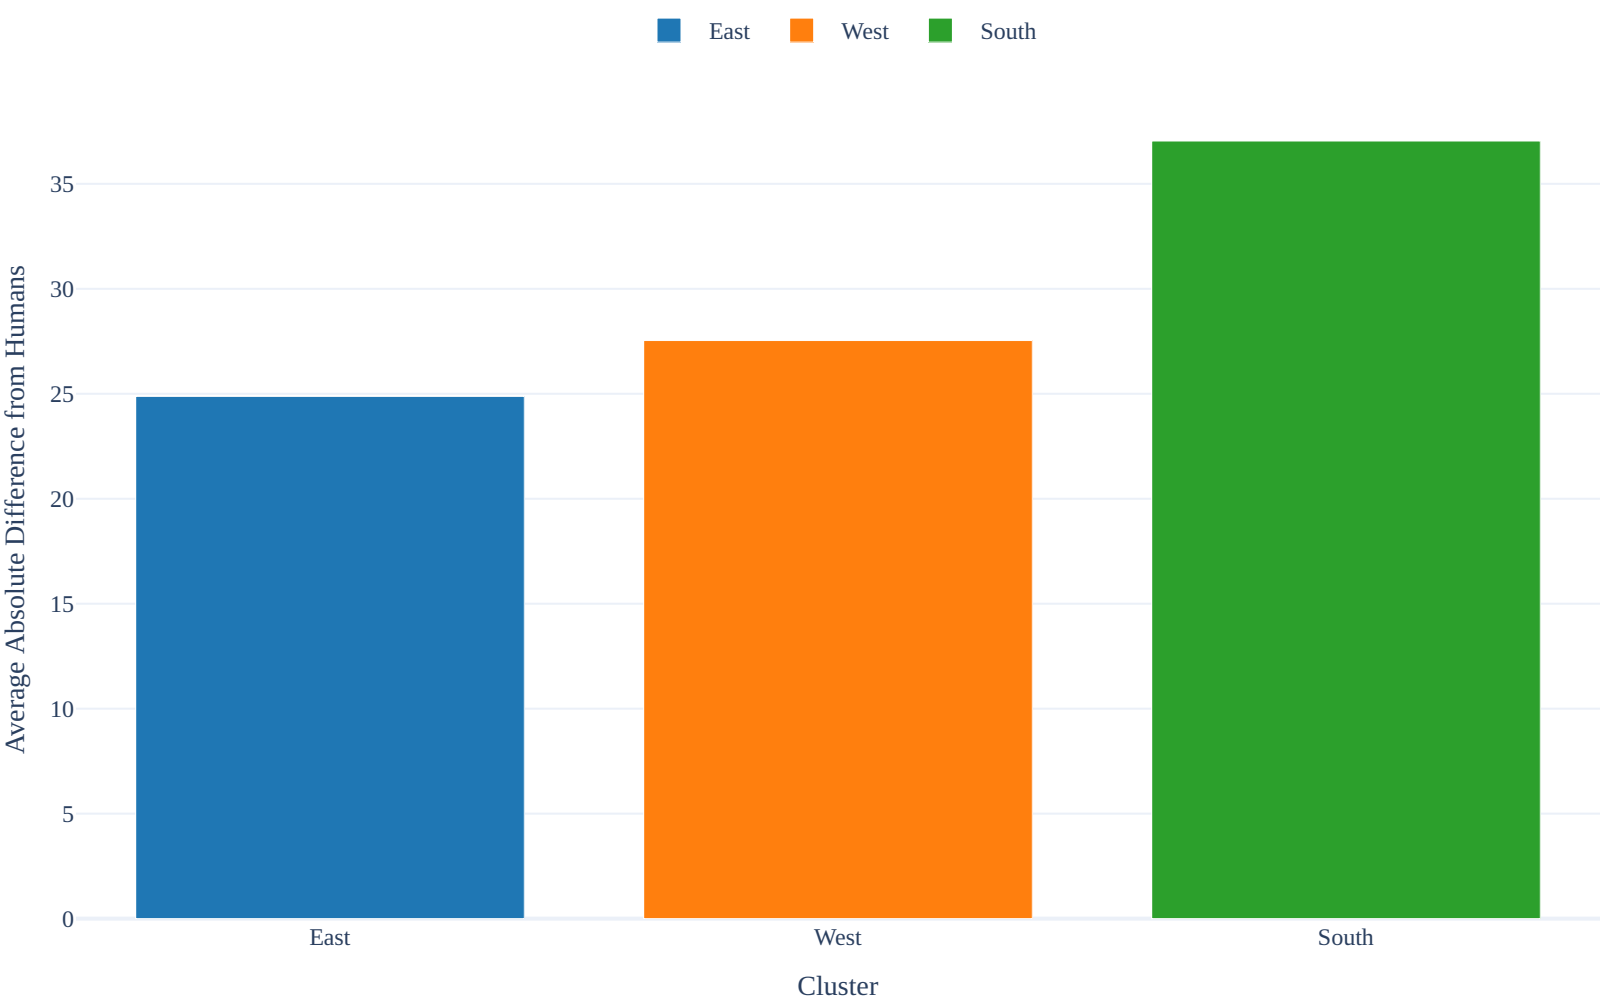

Supplement: supplementary_material [file attachment]

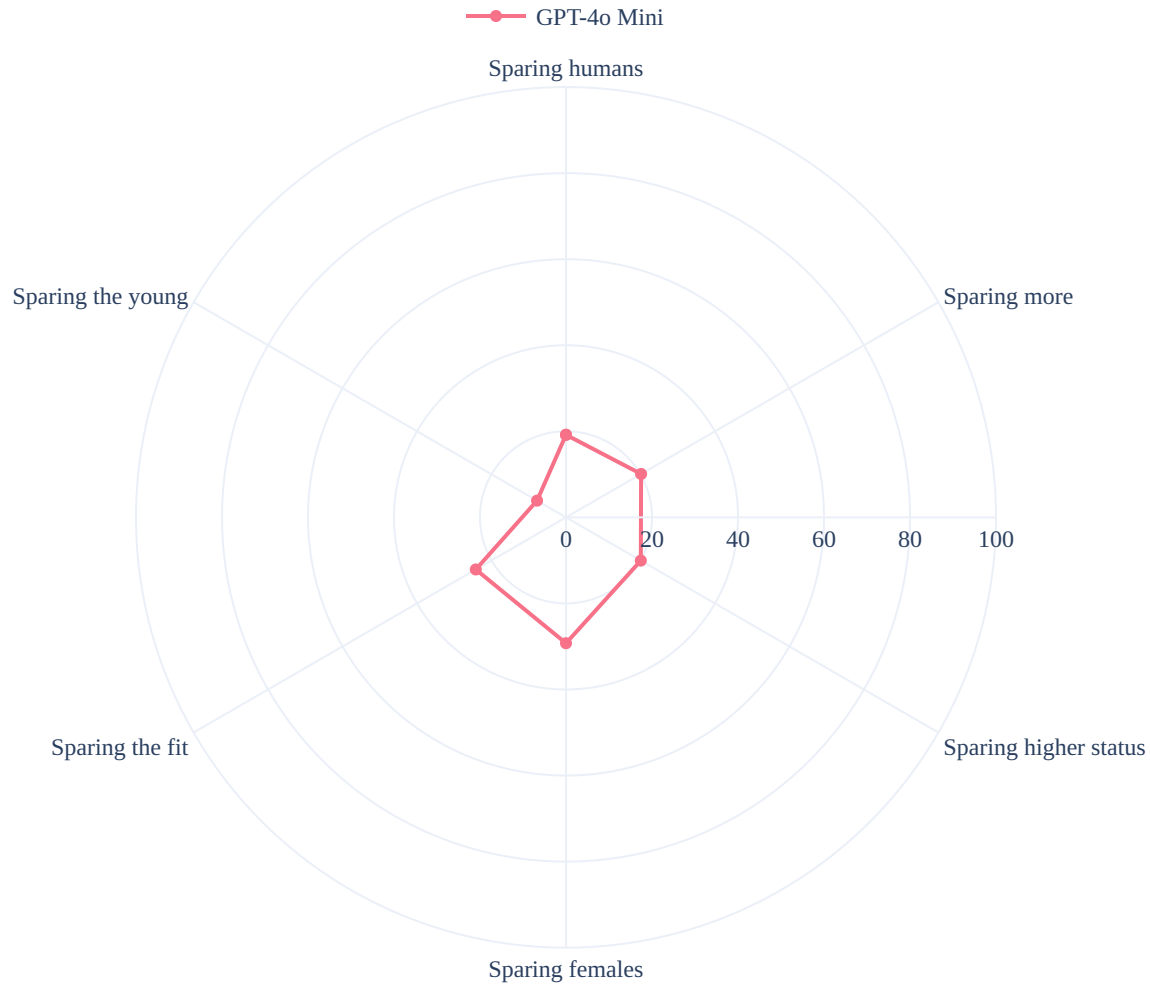

Supplement: supplementary_material [file attachment]

Llama 2 13B

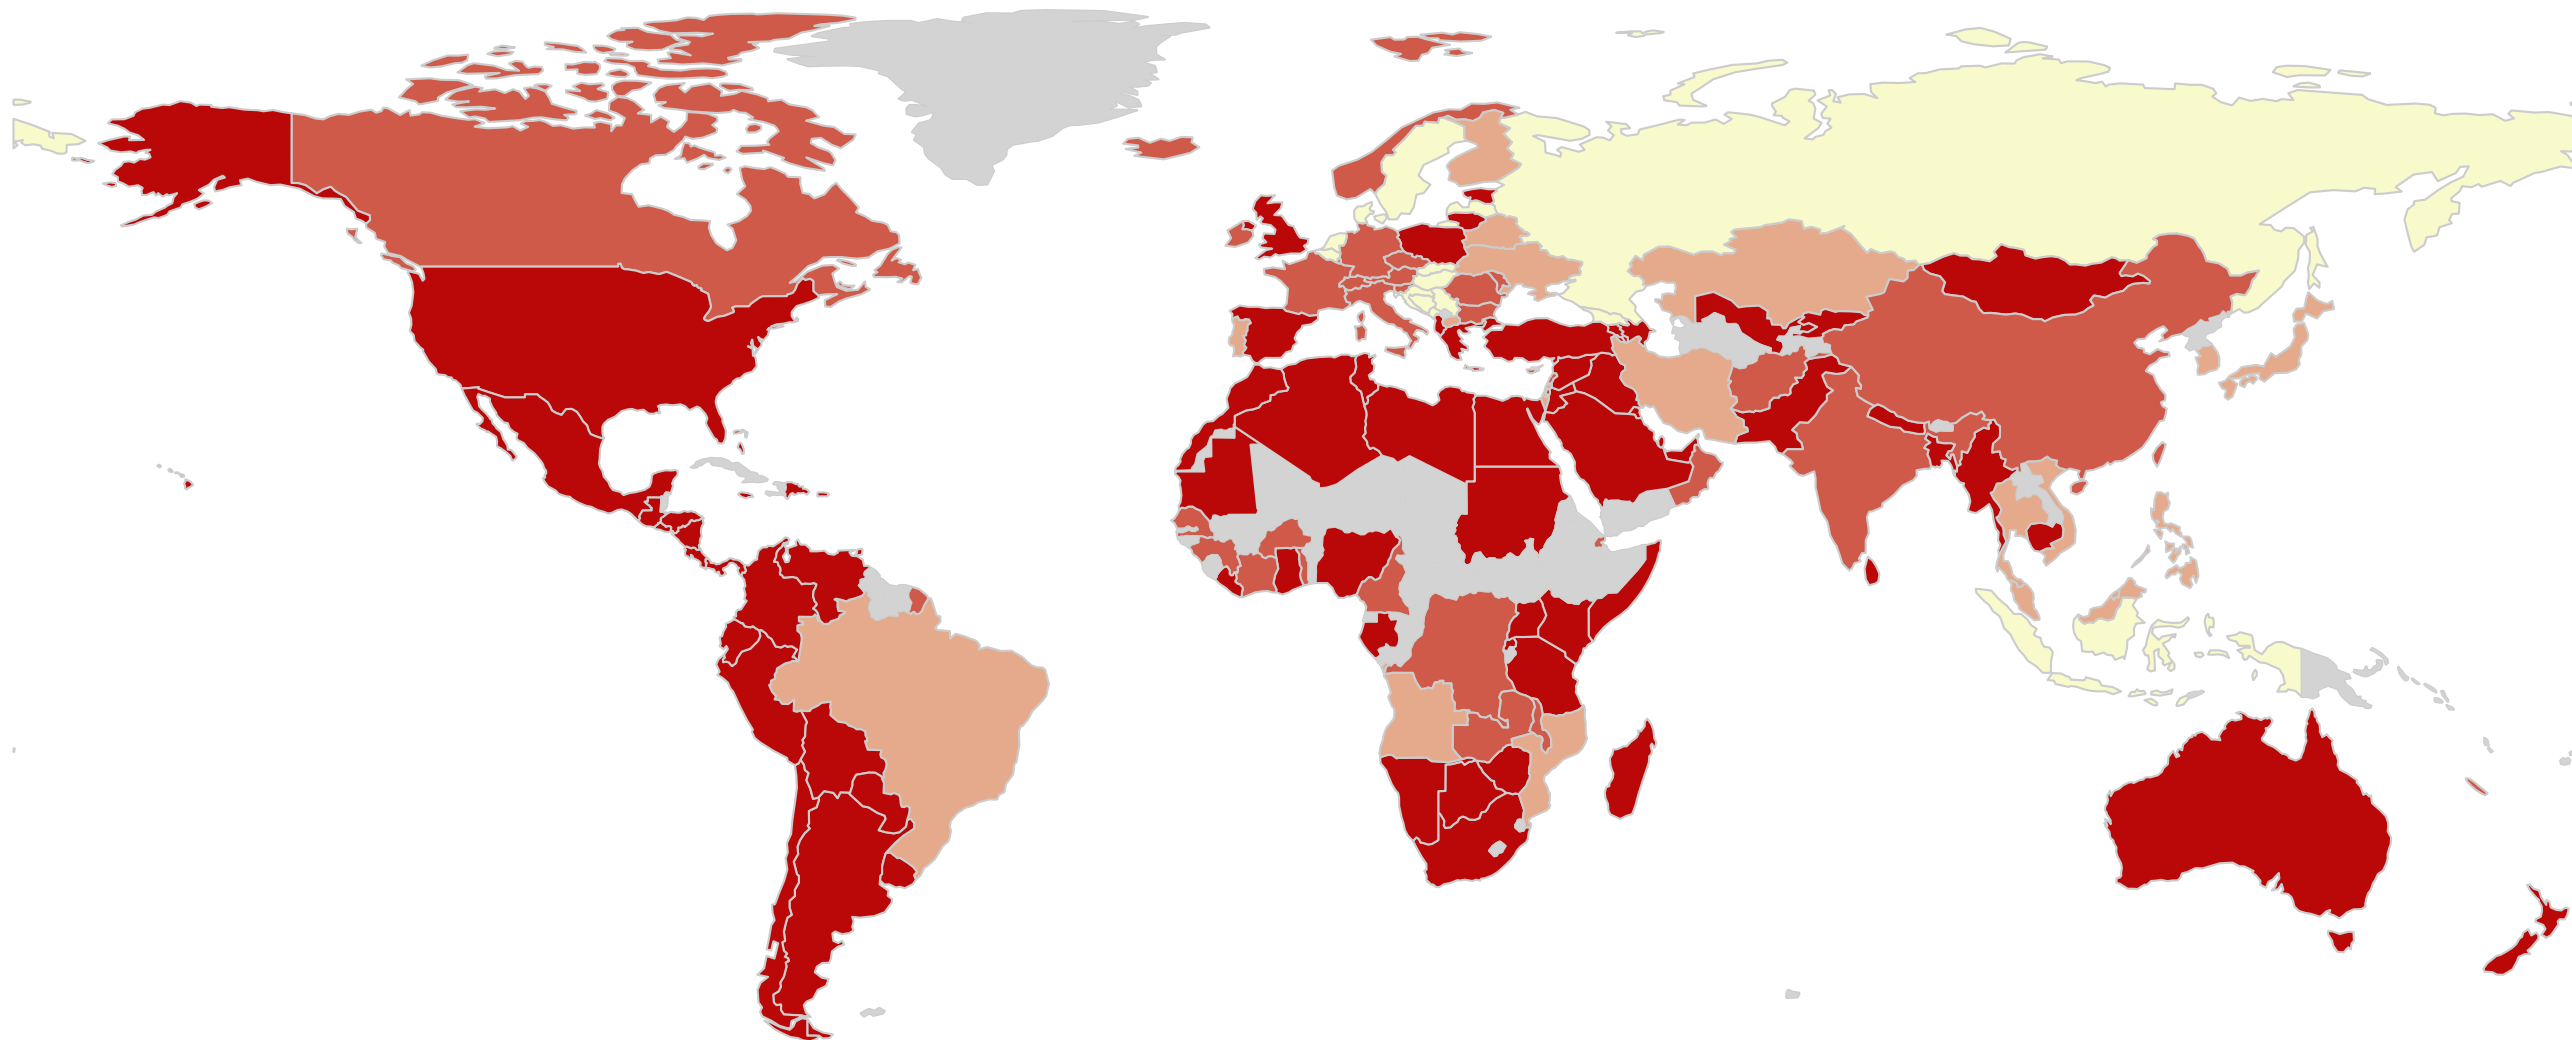

  $\leq 0.58$  (1st Q)     $\leq 0.82$  (2nd Q)     $\leq 1.30$  (3rd Q)     $\leq 1.90$  (4th Q)    No Data

Supplement: supplementary_material [file attachment]

■ Qwen 2 7B ○ Human Preference

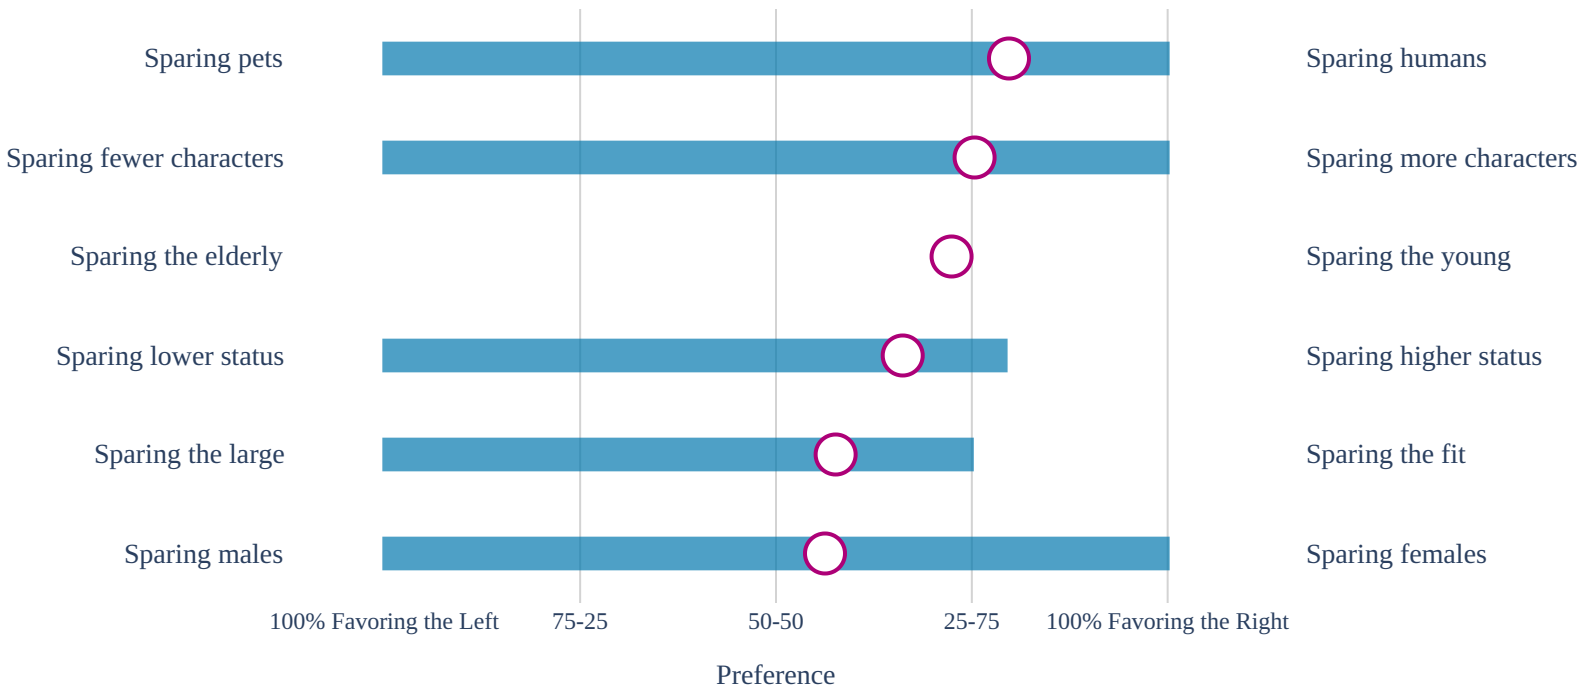

Supplement: supplementary_material [file attachment]

Llama 3.1 8B

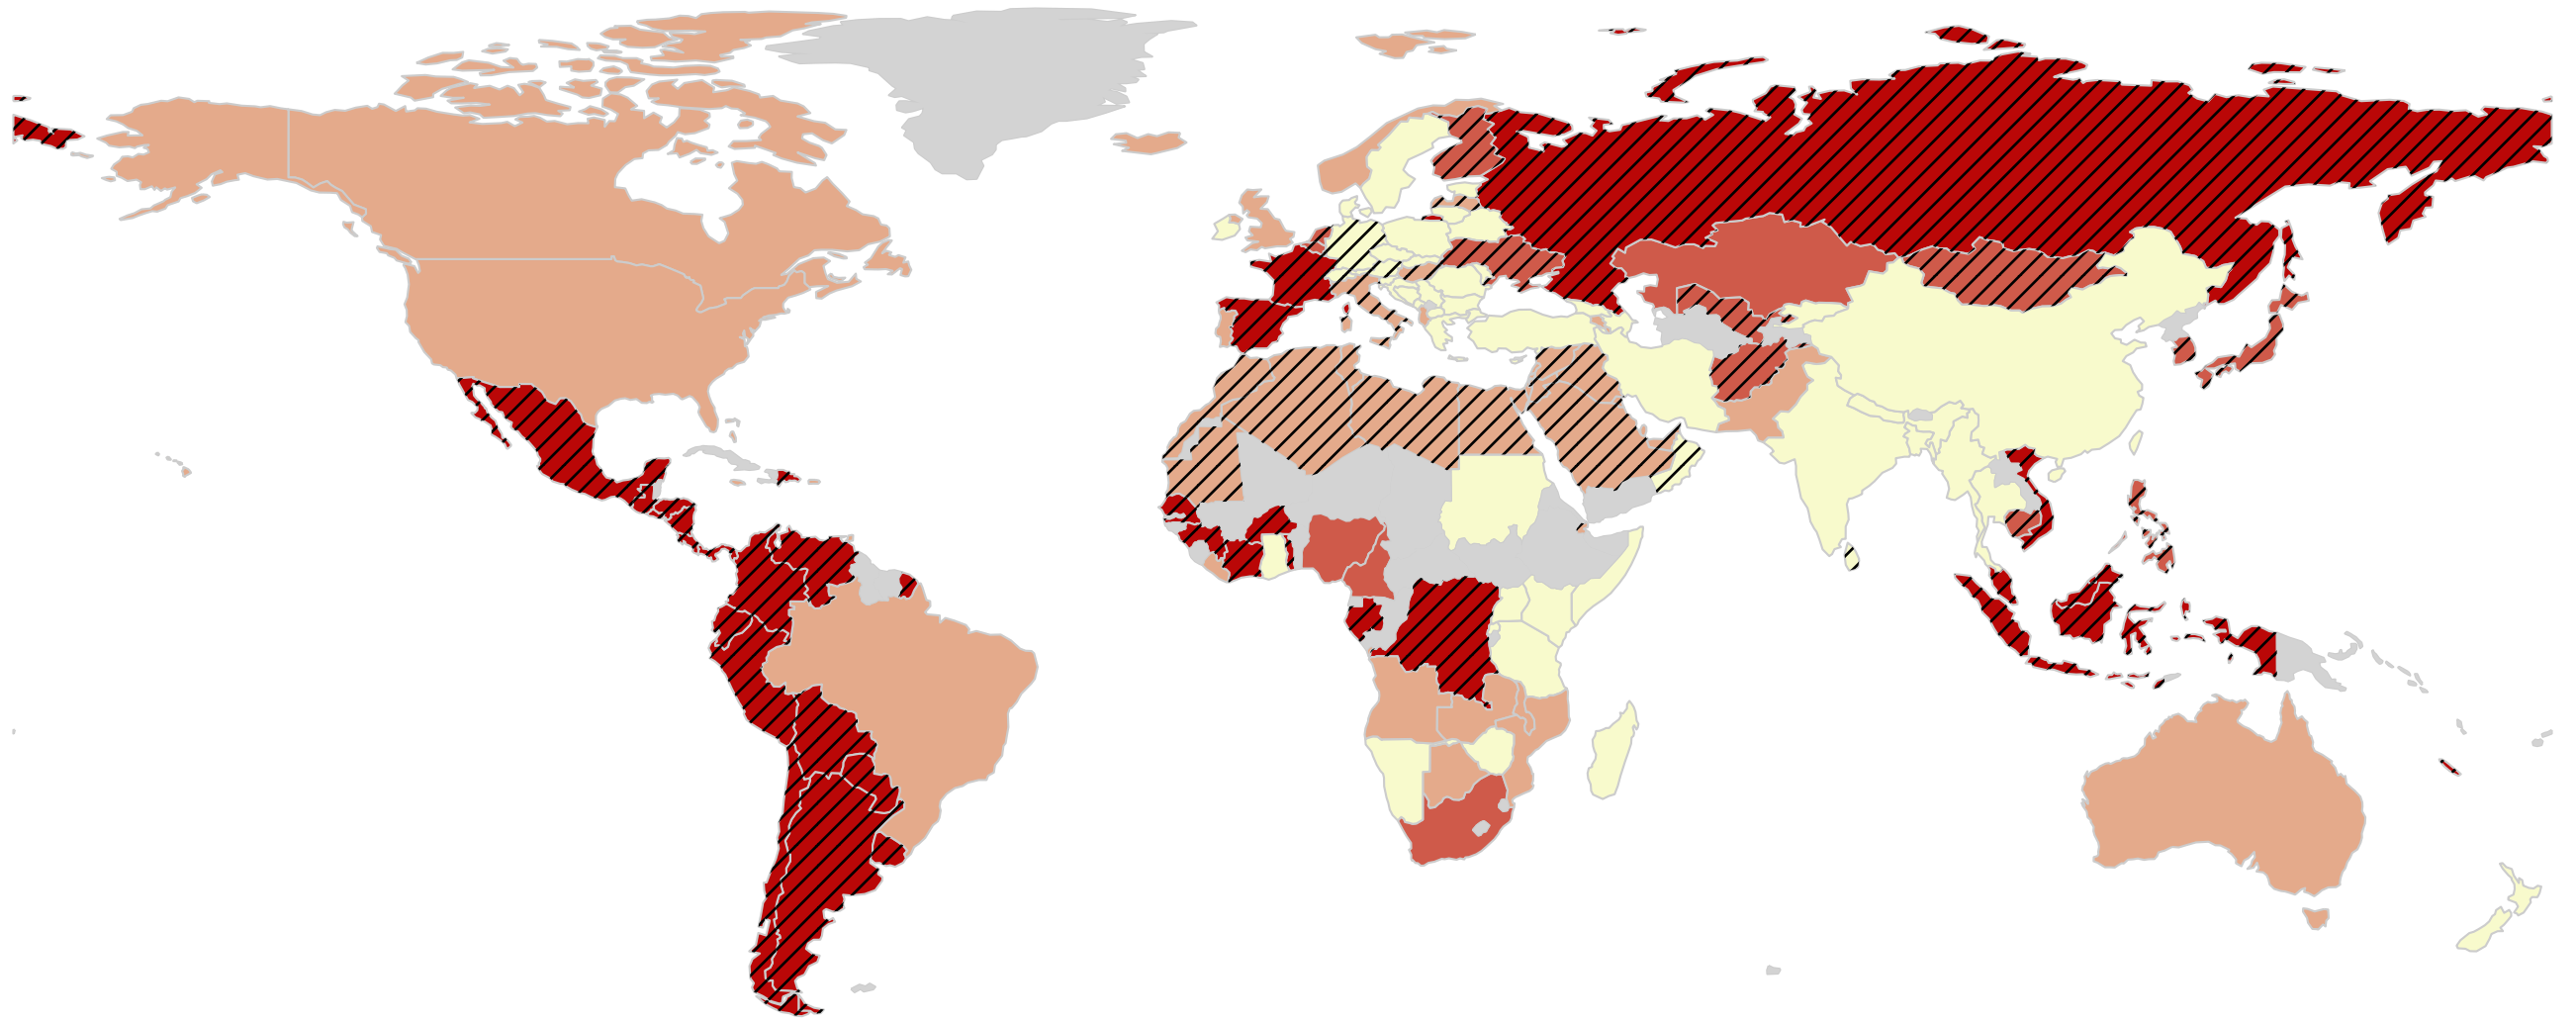

$\leq 0.58$  (1st Q)     $\leq 0.82$  (2nd Q)     $\leq 1.30$  (3rd Q)     $\leq 1.90$  (4th Q)    No Data    High Refusal

Supplement: supplementary_material [file attachment]
