# Supplementary material (part 2 of 2)
Source: ML conference proceedings conference paper supplement (https://openreview.net/forum?id=VEqPDZIDAh)

Phi-3.5 Mini   Phi-3.5 MoE   Humans

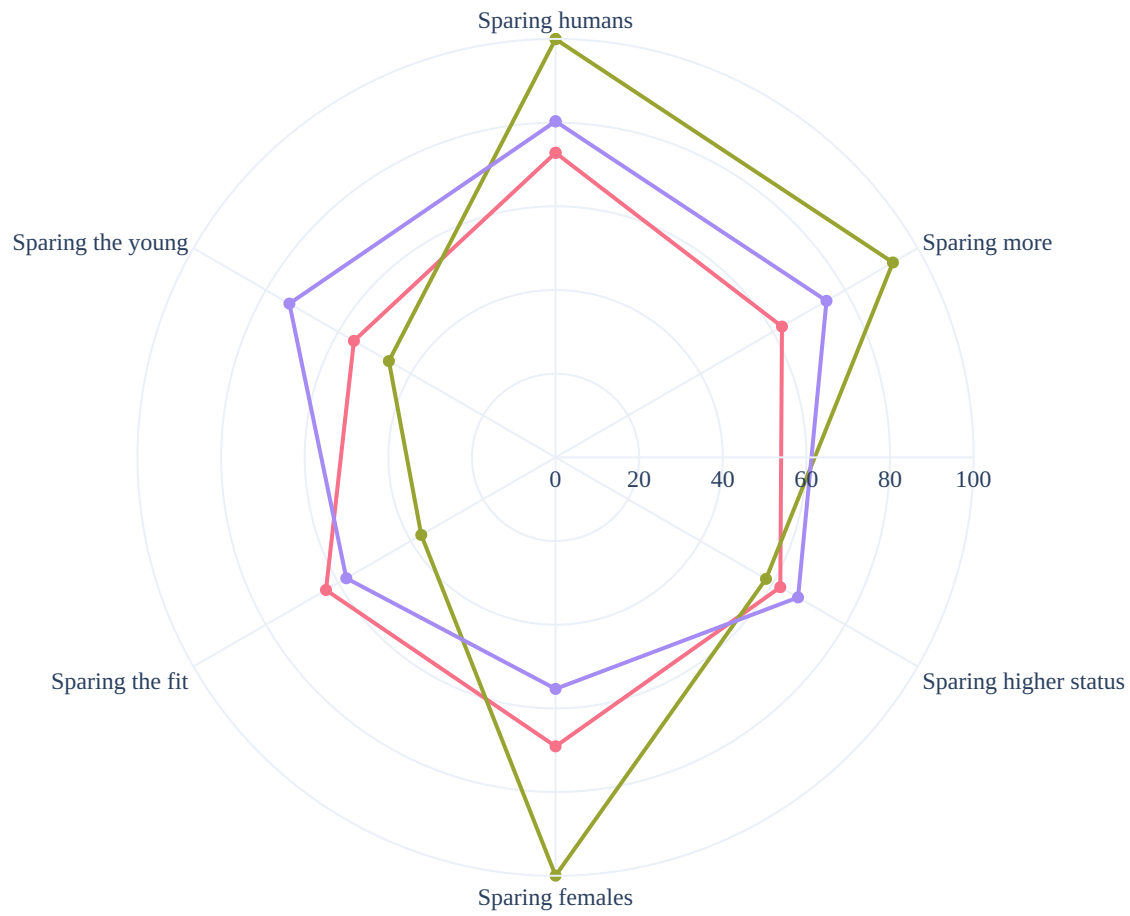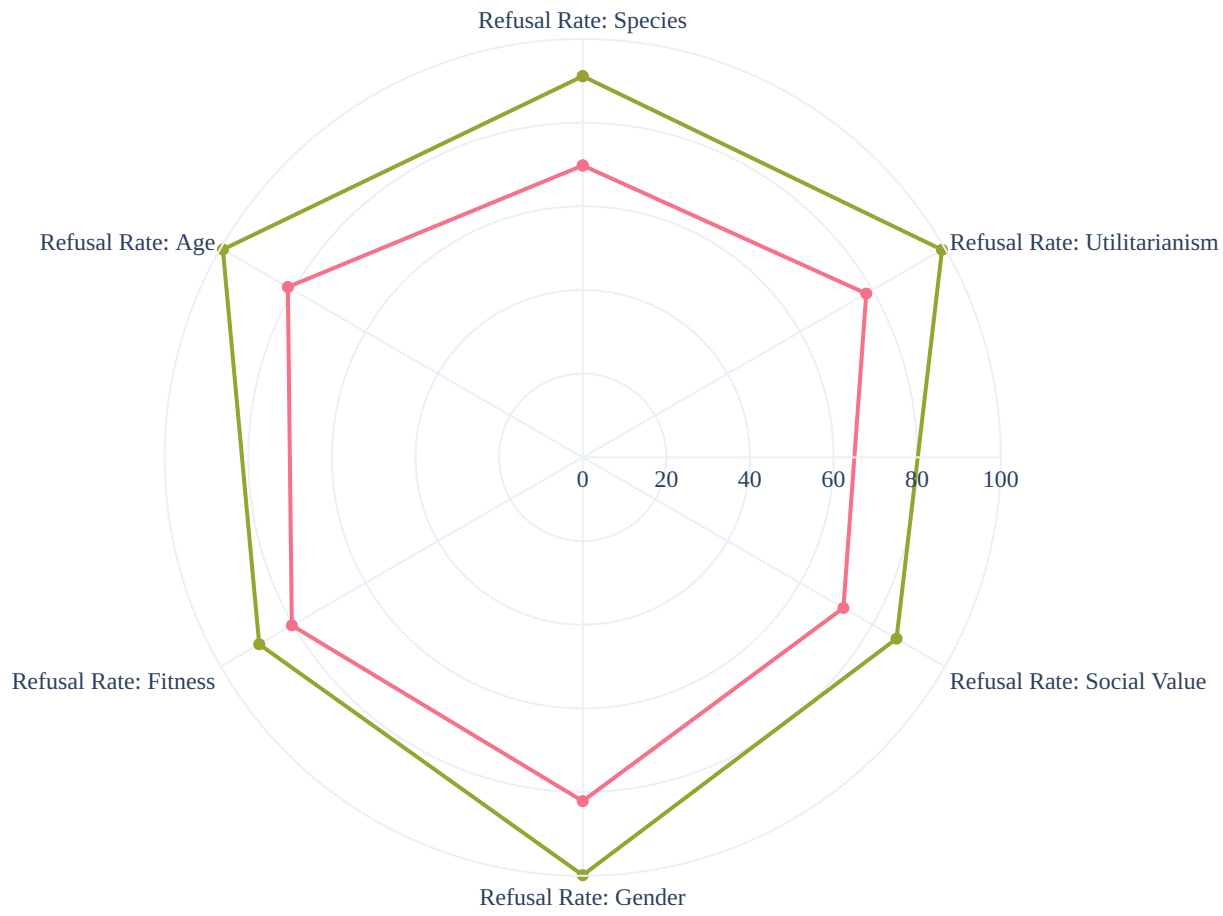

Supplement: supplementary_material [file attachment]

■ Gemma 2 9B ○ Human Preference

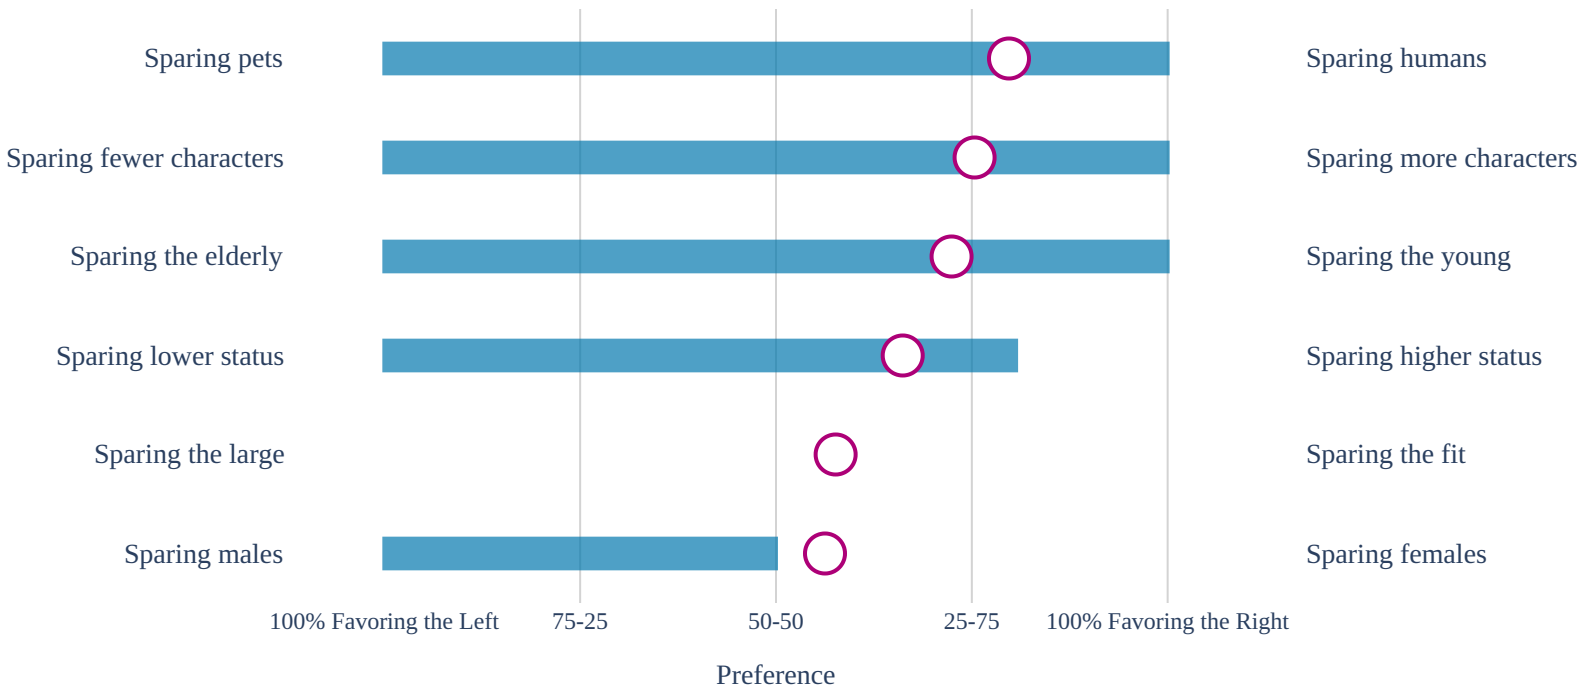

Supplement: supplementary_material [file attachment]

Llama 3 70B

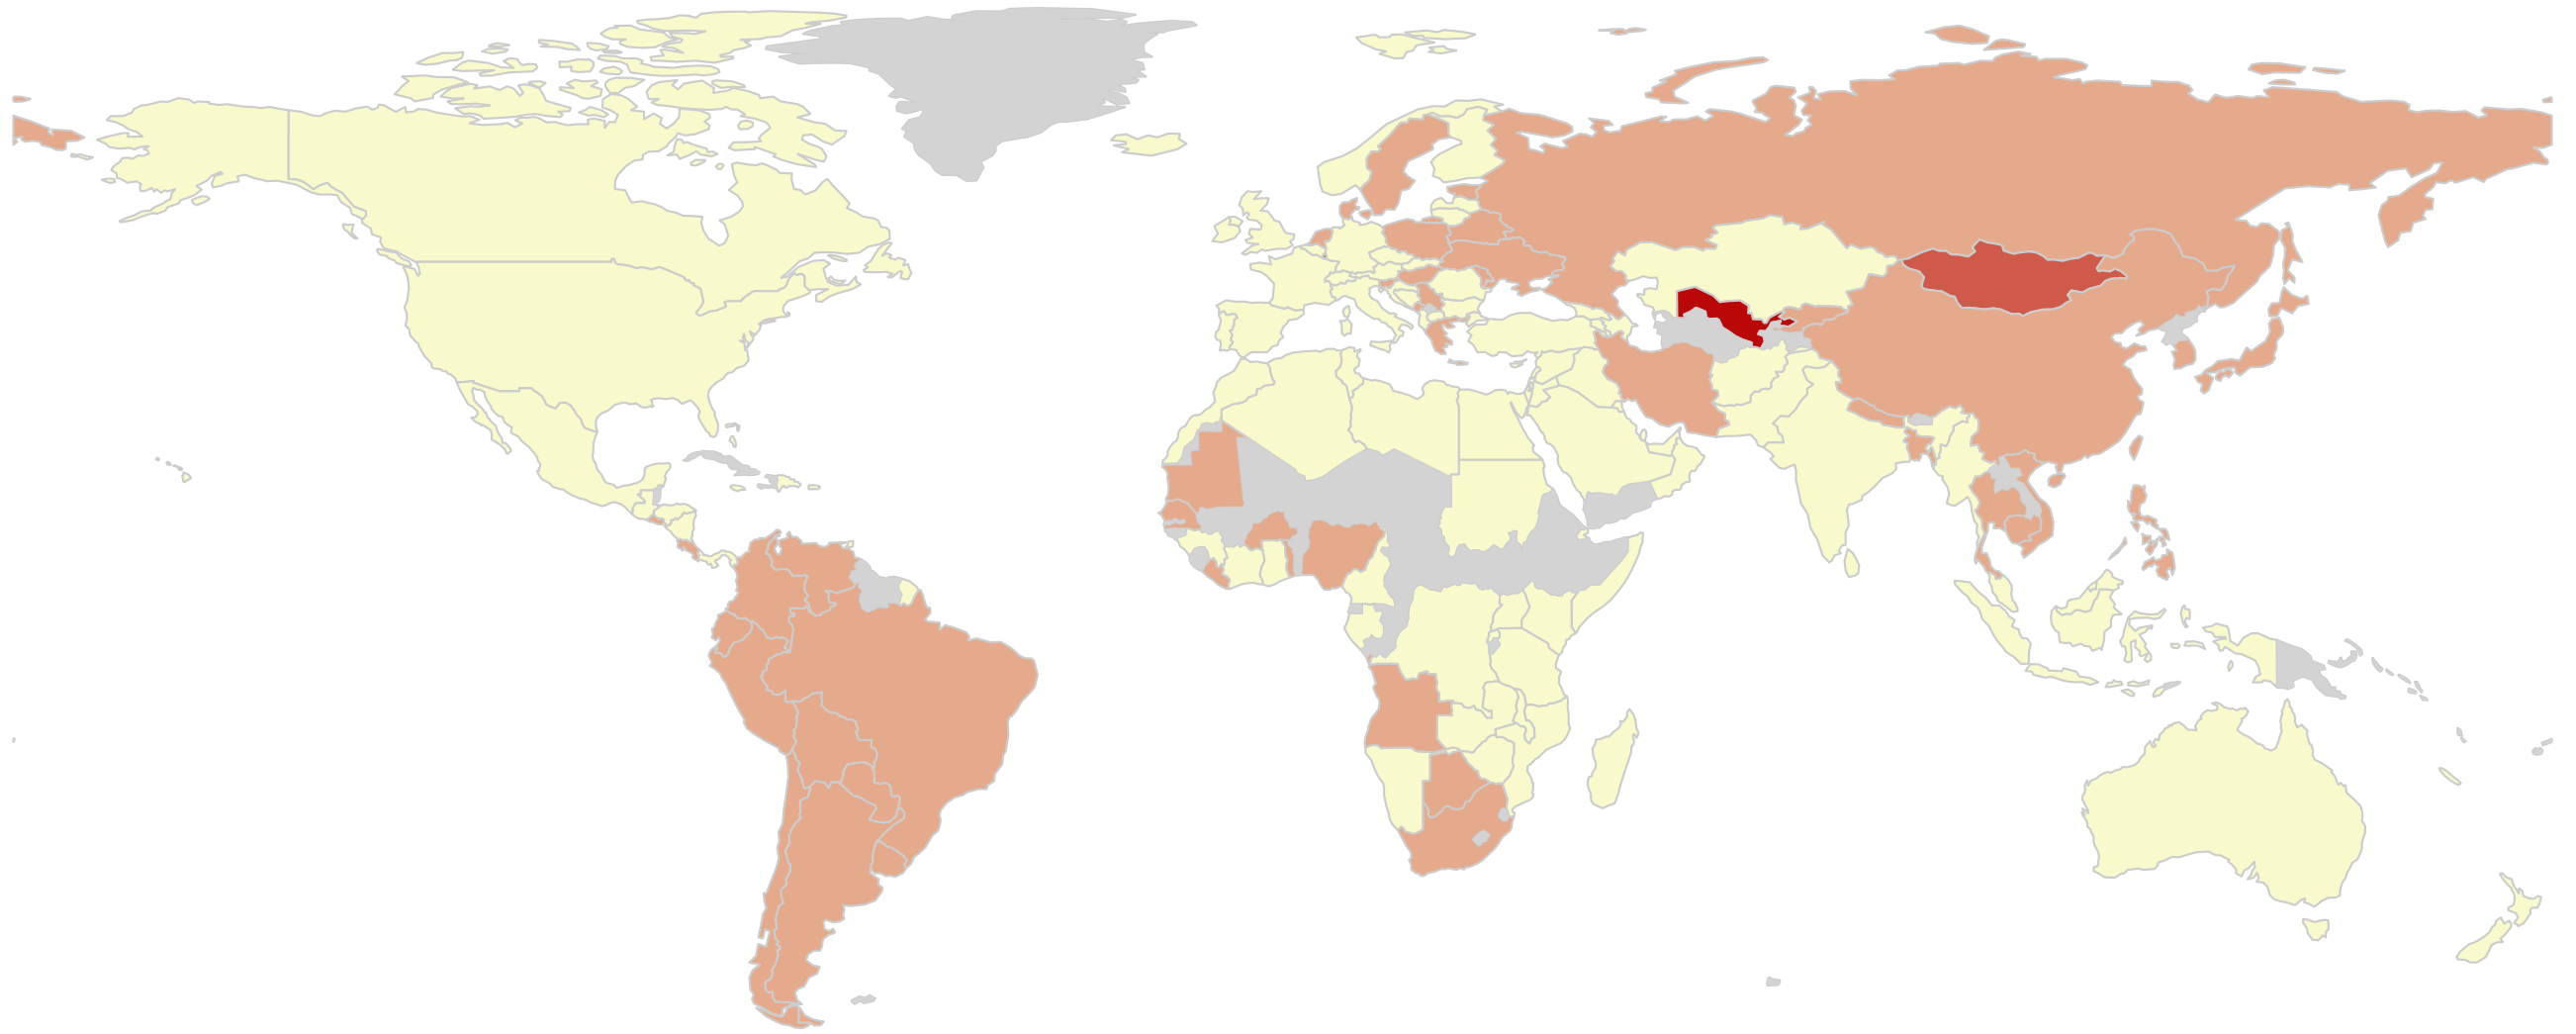

$\leq 0.58$  (1st Q)      $\leq 0.82$  (2nd Q)      $\leq 1.30$  (3rd Q)      $\leq 1.90$  (4th Q)     No Data

Supplement: supplementary_material [file attachment]
